# Supplementary material for: A mild catalytic synthesis of 2-oxazolines via oxetane ring-opening: rapid access to a diverse family of natural products
Source: PubMed Central journal article supplement — Chem Sci. 2019 Aug 26;10(41):9586–90. doi: 10.1039/c9sc03843d (PMC6993743; doi:10.1039/c9sc03843d), 2019-08-26
Supplement: SC-010-C9SC03843D-s001.pdf [file SC-010-C9SC03843D-s001.pdf]

## Supporting Information

### **A Mild Catalytic Synthesis of 2-Oxazolines via Oxetane Ring-Opening: Rapid Access to A Diverse Family of Natural Products**

Hai Huang,<sup>a</sup> Wen Yang,<sup>b</sup> Zuliang Chen,<sup>b</sup> Zengwei Lai<sup>b</sup> and Jianwei Sun<sup>\*a,b</sup>

<sup>a</sup> *Jiangsu Key Laboratory of Advanced Catalytic Materials & Technology, School of Petrochemical Engineering, Changzhou University, Changzhou 213164, China;*

<sup>b</sup> *Department of Chemistry, the Hong Kong University of Science and Technology, Clear Water Bay, Kowloon, Hong Kong SAR, China*

### **Table of Contents**

|                                                      |             |
|------------------------------------------------------|-------------|
| <b>I. General Information.....</b>                   | <b>S-2</b>  |
| <b>II. Synthesis of the Oxetane Substrates.....</b>  | <b>S-3</b>  |
| <b>III. Catalytic Synthesis of Oxazolines .....</b>  | <b>S-21</b> |
| <b>IV. Product Derivatizations and Utility .....</b> | <b>S-44</b> |
| <b>V. Synthesis of Diverse Natural Products.....</b> | <b>S-48</b> |
| <b>VI. Product Structure Determination .....</b>     | <b>S-51</b> |

### **NMR Spectra**

## I. General Information

Flash column chromatography was performed over silica gel (200-300 mesh) purchased from Qindao Puke Co., China. All air or moisture sensitive reactions were conducted in oven-dried glassware under nitrogen atmosphere using anhydrous solvents. Anhydrous toluene, acetonitrile, dichloromethane, chloroform, methanol, and tetrahydrofuran were purified by the Innovative® solvent purification system.  $^1\text{H}$ ,  $^{13}\text{C}$ , and  $^{19}\text{F}$  NMR spectra were collected on a Bruker AV 400 MHz NMR spectrometer using residue solvent peaks as an internal standard ( $^1\text{H}$  NMR:  $\text{CDCl}_3$  at 7.26 ppm,  $\text{DMSO-}d_6$  at 2.50 ppm, acetone- $d_6$  at 2.05 ppm;  $^{13}\text{C}$  NMR:  $\text{CDCl}_3$  at 77.0 ppm,  $\text{DMSO-}d_6$  at 39.5 ppm, acetone- $d_6$  at 29.8 ppm). Mass spectra were collected on an Agilent GC/MS 5975C system, a MALDI Micro MX mass spectrometer, or an API QSTAR XL System. IR spectra were recorded on Bruker TENSOR 27 spectrometer and reported in terms of frequency of absorption ( $\text{cm}^{-1}$ ).

## II. Synthesis of the Oxetane Substrates

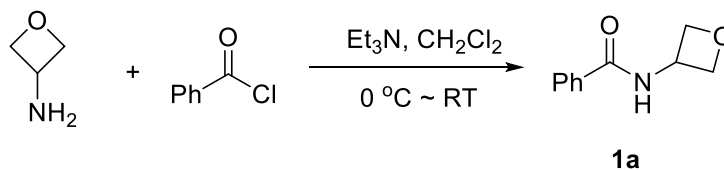

***N*-(Oxetan-3-yl)benzamide (1a).** At 0 °C, to a stirred solution of oxetan-3-amine (731 mg, 10.0 mmol) and trimethylamine (2.8 mL, 20.0 mmol) in anhydrous CH<sub>2</sub>Cl<sub>2</sub> (20 mL) was added dropwise a solution of benzoyl chloride (1.69 g, 12.0 mmol) in anhydrous CH<sub>2</sub>Cl<sub>2</sub> (10 mL). The mixture was allowed to warm to room temperature spontaneously. After stirring for 6 h, the mixture was quenched with saturated NH<sub>4</sub>Cl aqueous solution (20 mL) and diluted with CH<sub>2</sub>Cl<sub>2</sub> (60 mL). The organic layer was separated, washed with water (2×20 mL) and brine (20 mL), dried over anhydrous Na<sub>2</sub>SO<sub>4</sub>, and concentrated under reduced pressure. The residue was purified by simple recrystallization (hexanes and diethyl ether) to afford the pure amide **1a** (95% yield, white solid).

<sup>1</sup>H NMR (400 MHz, CDCl<sub>3</sub>) δ 7.82–7.77 (m, 2H), 7.53–7.49 (m, 1H), 7.44–7.40 (m, 2H), 6.96 (br s, 1H), 5.25–5.20 (m, 1H), 5.00 (dd, *J*<sub>1</sub> = 6.8 Hz, *J*<sub>2</sub> = 2.8 Hz, 2H), 4.60 (t, *J* = 6.4 Hz, 2H) ppm.

<sup>13</sup>C NMR (100 MHz, CDCl<sub>3</sub>) δ 167.1, 133.7, 131.8, 128.6, 127.0, 78.4, 45.3 ppm.

IR (thin film) 3297, 3071, 2961, 2877, 1642, 1547, 1293, 1192, 969, 884, 701 cm<sup>-1</sup>.

HRMS (CI<sup>+</sup>) Calcd for C<sub>10</sub>H<sub>12</sub>NO<sub>2</sub> [M + H]<sup>+</sup>: 178.0868, Found: 178.0875.

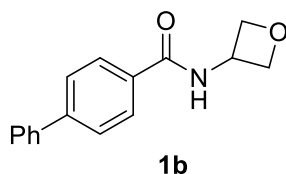

***N*-(oxetan-3-yl)-(1,1'-biphenyl)-4-carboxamide (1b)** was prepared by following the same procedure for the synthesis of **1a** (84% yield, white solid).

$^1\text{H NMR}$  (400 MHz,  $\text{DMSO-}d_6$ )  $\delta$  9.14 (d,  $J = 6.4$  Hz, 1H), 7.99 (d,  $J = 8.4$  Hz, 2H), 7.79 (d,  $J = 8.4$  Hz, 2H), 7.74 (d,  $J = 7.2$  Hz, 2H), 7.50 (t,  $J = 7.6$  Hz, 2H), 7.43–7.39 (m, 1H), 5.08–5.00 (m, 1H), 4.79 (dd,  $J_1 = 7.2$  Hz,  $J_2 = 6.4$  Hz, 2H), 4.62 (t,  $J = 6.4$  Hz, 2H) ppm.

$^{13}\text{C NMR}$  (100 MHz,  $\text{DMSO-}d_6$ )  $\delta$  165.6, 142.9, 139.1, 132.6, 129.0, 128.1, 128.0, 126.8, 126.5, 76.9, 44.6 ppm.

**IR** (thin film) 3445, 3277, 2959, 2813, 1632, 1534, 967, 849, 746, 699  $\text{cm}^{-1}$ .

**HRMS** (CI<sup>+</sup>) Calcd for  $\text{C}_{16}\text{H}_{16}\text{NO}_2$  [ $\text{M} + \text{H}$ ]<sup>+</sup>: 254.1181, Found: 254.1178.

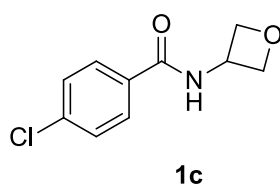

**4-Chloro-N-(oxetan-3-yl)benzamide (1c)** was prepared by following the same procedure for the synthesis of **1a** (92% yield, white solid).

$^1\text{H NMR}$  (400 MHz,  $\text{CDCl}_3$ )  $\delta$  7.73 (d,  $J = 8.0$  Hz, 2H), 7.40 (d,  $J = 8.0$  Hz, 2H), 7.01 (br s, 1H), 5.24–5.19 (m, 1H), 5.00 (t,  $J = 7.2$  Hz, 2H), 4.60 (t,  $J = 6.4$  Hz, 2H) ppm.

$^{13}\text{C NMR}$  (100 MHz,  $\text{CDCl}_3$ )  $\delta$  166.1, 138.2, 132.0, 128.9, 128.4, 78.4, 45.4 ppm.

**IR** (thin film) 3277, 3075, 2950, 2876, 1637, 1539, 1184, 1084, 967, 715, 674  $\text{cm}^{-1}$ .

**HRMS** (CI<sup>+</sup>) Calcd for  $\text{C}_{10}\text{H}_{11}\text{ClNO}_2$  [ $\text{M} + \text{H}$ ]<sup>+</sup>: 212.0478, Found: 212.0470.

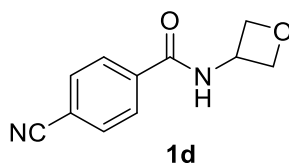

**4-Cyano-N-(oxetan-3-yl)benzamide (1d)** was prepared by following the same procedure for the synthesis of **1a** (92% yield, white solid).

$^1\text{H NMR}$  (400 MHz,  $\text{acetone-}d_6$ )  $\delta$  8.59 (br s, 1H), 8.10–8.07 (m, 2H), 7.91–7.88 (m, 2H), 5.21–5.12 (m, 1H), 4.85 (t,  $J = 7.2$  Hz, 2H), 4.65 (t,  $J = 6.4$  Hz, 2H) ppm.

$^{13}\text{C NMR}$  (100 MHz,  $\text{acetone-}d_6$ )  $\delta$  165.7, 139.3, 133.3, 129.1, 118.9, 115.7, 78.2, 46.4, ppm.

IR (thin film) 3440, 2222, 1632, 957, 739, 671  $\text{cm}^{-1}$ .

HRMS (CI+) Calcd for  $\text{C}_{11}\text{H}_{11}\text{N}_2\text{O}_2$   $[\text{M} + \text{H}]^+$ : 203.0821, Found: 203.0818.

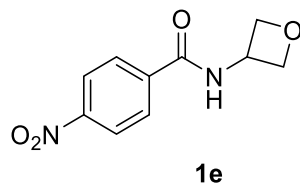

**4-Nitro-N-(oxetan-3-yl)benzamide (1e)** was prepared by following the same procedure for the synthesis of **1a** (90% yield, pale yellow solid).

$^1\text{H}$  NMR (400 MHz, acetone- $d_6$ )  $\delta$  8.69 (br s, 1H), 8.31 (dd,  $J_1 = 7.2$  Hz,  $J_2 = 2.0$  Hz, 2H), 8.15 (dd,  $J_1 = 7.2$  Hz,  $J_2 = 2.0$  Hz, 2H), 5.22–5.13 (m, 1H), 4.86 (t,  $J = 7.2$  Hz, 2H), 4.66 (t,  $J = 6.4$  Hz, 2H) ppm.

$^{13}\text{C}$  NMR (100 MHz, acetone- $d_6$ )  $\delta$  165.5, 150.6, 140.9, 129.7, 124.4, 78.2, 46.4 ppm.

IR (thin film) 3446, 1637, 1515, 1341, 1279, 963, 756, 705  $\text{cm}^{-1}$ .

HRMS (CI+) Calcd for  $\text{C}_{10}\text{H}_{11}\text{N}_2\text{O}_4$   $[\text{M} + \text{H}]^+$ : 223.0719, Found: 223.0716.

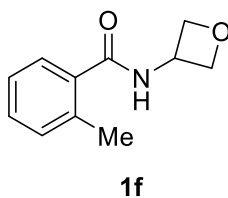

**2-Methyl-N-(oxetan-3-yl)benzamide (1f)** was prepared by following the same procedure for the synthesis of **1a** (87% yield, white solid).

$^1\text{H}$  NMR (400 MHz,  $\text{CDCl}_3$ )  $\delta$  7.36–7.31 (m, 2H), 7.23–7.18 (m, 2H), 6.46 (br s, 1H), 5.24–5.15 (m, 1H), 4.99 (t,  $J = 7.2$  Hz, 2H), 4.55 (t,  $J = 6.4$  Hz, 2H), 2.42 (s, 3H) ppm.

$^{13}\text{C}$  NMR (100 MHz,  $\text{CDCl}_3$ )  $\delta$  169.5, 136.3, 135.4, 131.2, 130.3, 126.6, 125.8, 78.5, 45.0, 19.8 ppm.

IR (thin film) 3453, 3279, 2951, 2879, 1642, 1539, 1290, 1188, 977, 889, 733  $\text{cm}^{-1}$ .

HRMS (CI+) Calcd for  $\text{C}_{11}\text{H}_{14}\text{NO}_2$   $[\text{M} + \text{H}]^+$ : 192.1025, Found: 192.1034.

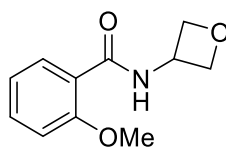

**1g**

**2-Methoxy-N-(oxetan-3-yl)benzamide (1g)** was prepared by following the same procedure for the synthesis of **1a** (95% yield, white solid).

<sup>1</sup>H NMR (400 MHz, CDCl<sub>3</sub>) δ 8.39 (br s, 1H), 8.16 (dd, *J*<sub>1</sub> = 8.0 Hz, *J*<sub>2</sub> = 2.0 Hz, 1H), 7.46 (td, *J*<sub>1</sub> = 4.4 Hz, *J*<sub>2</sub> = 2.0 Hz, 1H), 7.08 (t, *J* = 7.6 Hz, 1H), 6.99 (d, *J* = 8.4 Hz, 1H), 5.28–5.20 (m, 1H), 5.01 (t, *J* = 7.2 Hz, 2H), 4.61 (t, *J* = 6.8 Hz, 2H), 4.00 (s, 3H) ppm.

<sup>13</sup>C NMR (100 MHz, CDCl<sub>3</sub>) δ 164.8, 157.5, 133.2, 132.3, 121.4, 120.6, 111.3, 78.8, 56.0, 44.9 ppm.

IR (thin film) 3379, 2963, 2884, 1638, 1537, 1480, 1300, 1246, 1019, 965, 759 cm<sup>-1</sup>.

HRMS (CI<sup>+</sup>) Calcd for C<sub>11</sub>H<sub>14</sub>NO<sub>3</sub> [M + H]<sup>+</sup>: 208.0974, Found: 208.0973.

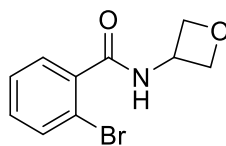

**1h**

**2-Bromo-N-(oxetan-3-yl)benzamide (1h)** was prepared by following the same procedure for the synthesis of **1a** (93% yield, white solid).

<sup>1</sup>H NMR (400 MHz, CDCl<sub>3</sub>) δ 7.58 (dd, *J*<sub>1</sub> = 8.0 Hz, *J*<sub>2</sub> = 1.2 Hz, 1H), 7.49 (dd, *J*<sub>1</sub> = 7.6 Hz, *J*<sub>2</sub> = 2.0 Hz, 1H), 7.35 (td, *J*<sub>1</sub> = 7.6 Hz, *J*<sub>2</sub> = 1.2 Hz, 1H), 7.29 (td, *J*<sub>1</sub> = 7.6 Hz, *J*<sub>2</sub> = 2.0 Hz, 1H), 6.81 (br s, 1H), 5.22–5.15 (m, 1H), 4.97 (t, *J* = 7.2 Hz, 2H), 4.59 (t, *J* = 6.8 Hz, 2H) ppm.

<sup>13</sup>C NMR (100 MHz, CDCl<sub>3</sub>) δ 167.0, 136.9, 133.4, 131.6, 129.6, 127.6, 119.2, 78.1, 45.2 ppm.

IR (thin film) 3269, 3068, 2947, 2875, 1648, 1540, 1364, 1540, 1364, 1313, 1023, 979, 891, 735, 685 cm<sup>-1</sup>.

HRMS (CI<sup>+</sup>) Calcd for C<sub>10</sub>H<sub>11</sub>BrNO<sub>2</sub> [M + H]<sup>+</sup>: 255.9973, Found: 255.9970.

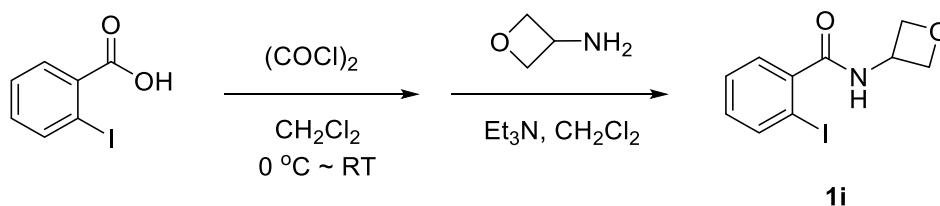

**2-Iodo-N-(oxetan-3-yl)benzamide (1i).** At 0 °C, to a stirred solution of 2-iodobenzoic acid (1.49 g, 6.0 mmol) and DMF (10  $\mu$ L) in anhydrous CH<sub>2</sub>Cl<sub>2</sub> (20 mL) was added dropwise oxalyl chloride (767  $\mu$ L, 9.0 mmol). After stirring at room temperature overnight, the mixture was concentrated to give the desired crude acyl chloride. Next, at 0 °C, to a stirred solution of oxetan-3-amine (439 mg, 6.0 mmol) and trimethylamine (1.3 mL, 9.0 mmol) in anhydrous CH<sub>2</sub>Cl<sub>2</sub> (20 mL) was added dropwise a solution of the crude acyl chloride in anhydrous CH<sub>2</sub>Cl<sub>2</sub> (10 mL). The mixture was then allowed to warm to room temperature spontaneously. After stirring for 6 h, the mixture was quenched with saturated NH<sub>4</sub>Cl aqueous solution (15 mL) and diluted with CH<sub>2</sub>Cl<sub>2</sub> (40 mL). The organic layer was separated, washed with water (2 $\times$ 20 mL) and brine (20 mL), dried over anhydrous Na<sub>2</sub>SO<sub>4</sub>, and concentrated under reduced pressure. The residue was purified by simple recrystallization (hexanes and diethyl ether) to afford the pure amide **1i** (88% yield, white solid).

<sup>1</sup>H NMR (400 MHz, CDCl<sub>3</sub>)  $\delta$  7.84 (d,  $J$  = 8.0 Hz, 1H), 7.38–7.34 (m, 2H), 7.12–7.08 (m, 1H), 6.69 (br s, 1H), 5.21–5.12 (m, 1H), 4.95 (t,  $J$  = 7.2 Hz, 2H), 4.61 (t,  $J$  = 6.4 Hz, 2H) ppm.

<sup>13</sup>C NMR (100 MHz, CDCl<sub>3</sub>)  $\delta$  168.8, 141.3, 139.8, 131.4, 128.2, 128.2, 92.3, 78.0, 45.2 ppm.

IR (thin film) 3285, 3063, 2960, 2880, 1642, 1536, 1298, 1016, 967, 885, 747 cm<sup>-1</sup>.

HRMS (CI<sup>+</sup>) Calcd for C<sub>10</sub>H<sub>11</sub>INO<sub>2</sub> [M + H]<sup>+</sup>: 303.9834, Found: 303.9841.

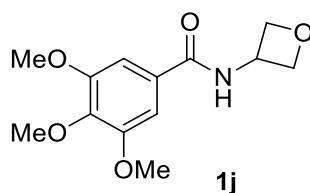

**3,4,5-Trimethoxy-N-(oxetan-3-yl)benzamide (1j)** was prepared by following the same procedure for the synthesis of **1a** (72% yield, white solid).

$^1\text{H NMR}$  (400 MHz,  $\text{CDCl}_3$ )  $\delta$  7.00 (s, 2H), 6.97 (br s, 1H), 5.22–5.17 (m, 1H), 4.99 (t,  $J = 7.2$  Hz, 2H), 4.60 (t,  $J = 6.4$  Hz, 2H), 3.86 (s, 9H) ppm.

$^{13}\text{C NMR}$  (100 MHz,  $\text{CDCl}_3$ )  $\delta$  166.8, 153.2, 141.1, 129.0, 104.4, 78.4, 60.9, 56.2, 45.4 ppm.

**IR** (thin film) 3445, 2954, 2885, 2839, 1638, 1586, 1499, 1339, 1237, 1126, 968, 872  $\text{cm}^{-1}$ .

**HRMS** (CI<sup>+</sup>) Calcd for  $\text{C}_{13}\text{H}_{18}\text{NO}_5$   $[\text{M} + \text{H}]^+$ : 268.1185, Found: 268.1190.

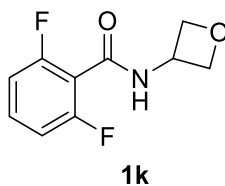

**2,6-Difluoro-N-(oxetan-3-yl)benzamide (1k)** was prepared by following the same procedure for the synthesis of **1a** (75% yield, white solid).

$^1\text{H NMR}$  (400 MHz,  $\text{CDCl}_3$ )  $\delta$  7.41–7.34 (m, 1H), 6.97–6.92 (m, 2H), 6.80 (br s, 1H), 5.26–5.17 (m, 1H), 4.97 (t,  $J = 7.2$  Hz, 2H), 4.57 (t,  $J = 6.4$  Hz, 2H) ppm.

$^{13}\text{C NMR}$  (100 MHz,  $\text{CDCl}_3$ )  $\delta$  160.0 (dd,  $J_1 = 251.0$  Hz,  $J_2 = 6.6$  Hz), 159.9, 132.0 (t like,  $J = 10.2$  Hz), 113.5 (t like,  $J = 19.3$  Hz), 111.9 (dt,  $J_1 = 20.1$  Hz,  $J_2 = 2.7$  Hz), 78.2, 45.2 ppm.

$^{19}\text{F NMR}$  (376.5 MHz,  $\text{CDCl}_3$ )  $\delta$  -112.1 ppm.

**IR** (thin film) 3260, 3074, 2965, 2875, 1632, 1560, 1470, 1238, 1009, 973, 885, 794  $\text{cm}^{-1}$ .

**HRMS** (CI<sup>+</sup>) Calcd for  $\text{C}_{10}\text{H}_{10}\text{F}_2\text{NO}_2$   $[\text{M} + \text{H}]^+$ : 214.0680, Found: 214.0686.



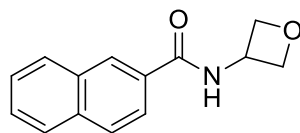

**1l**

**N-(Oxetan-3-yl)-2-naphthamide (1l)** was prepared by following the same procedure for the synthesis of **1a** (97% yield, white solid).

<sup>1</sup>H NMR (400 MHz, CDCl<sub>3</sub>) δ 8.31 (s, 1H), 7.90–7.82 (m, 4H), 7.59–7.52 (m, 2H), 7.06 (br s, 1H), 5.34–5.26 (m, 1H), 5.04 (t, *J* = 7.2 Hz, 2H), 4.67 (t, *J* = 6.8 Hz, 2H) ppm.

<sup>13</sup>C NMR (100 MHz, CDCl<sub>3</sub>) δ 167.2, 134.9, 132.5, 130.9, 128.9, 128.6, 127.9, 127.8, 127.6, 126.9, 123.4, 78.6, 45.4 ppm.

IR (thin film) 3446, 3248, 3060, 2965, 2881, 1621, 1545, 1301, 1033, 823, 772, 728 cm<sup>-1</sup>.

HRMS (CI<sup>+</sup>) Calcd for C<sub>14</sub>H<sub>14</sub>NO<sub>2</sub> [M + H]<sup>+</sup>: 228.1025, Found: 228.1026.

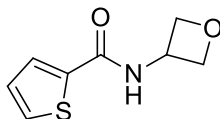

**1m**

**N-(Oxetan-3-yl)thiophene-2-carboxamide (1m)** was prepared by following the same procedure for the synthesis of **1a** (90% yield, white solid).

<sup>1</sup>H NMR (400 MHz, CDCl<sub>3</sub>) δ 7.59 (dd, *J*<sub>1</sub> = 3.6 Hz, *J*<sub>2</sub> = 0.8 Hz, 1H), 7.49 (dd, *J*<sub>1</sub> = 4.8 Hz, *J*<sub>2</sub> = 0.8 Hz, 1H), 7.07 (dd, *J*<sub>1</sub> = 4.8 Hz, *J*<sub>2</sub> = 3.6 Hz, 1H), 7.05 (br s, 1H), 5.24–5.17 (m, 1H), 4.97 (t, *J* = 7.2 Hz, 2H), 4.62 (t, *J* = 6.4 Hz, 2H) ppm.

<sup>13</sup>C NMR (100 MHz, CDCl<sub>3</sub>) δ 161.5, 138.1, 130.6, 128.6, 127.7, 78.3, 45.2 ppm.

IR (thin film) 3286, 3083, 2959, 2870, 1626, 1555, 1316, 1184, 958, 868, 723, 673 cm<sup>-1</sup>.

HRMS (CI<sup>+</sup>) Calcd for C<sub>8</sub>H<sub>10</sub>NO<sub>2</sub>S [M + H]<sup>+</sup>: 184.0432, Found: 184.0440.

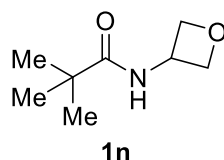

**N-(Oxetan-3-yl)pivalamide (1n)** was prepared by following the same procedure for the synthesis of **1a** (76% yield, white solid).

<sup>1</sup>H NMR (400 MHz, CDCl<sub>3</sub>) δ 6.24 (br s, 1H), 5.01–4.89 (m, 3H), 4.45 (t, *J* = 6.4 Hz, 2H), 1.19 (s, 9H) ppm.

<sup>13</sup>C NMR (100 MHz, CDCl<sub>3</sub>) δ 178.2, 78.5, 44.9, 38.5, 27.4 ppm.

IR (thin film) 3305, 3051, 2969, 2876, 1633, 1529, 1220, 970, 735, 642 cm<sup>-1</sup>.

HRMS (CI<sup>+</sup>) Calcd for C<sub>8</sub>H<sub>16</sub>NO<sub>2</sub> [M + H]<sup>+</sup>: 158.1181, Found: 158.1180.

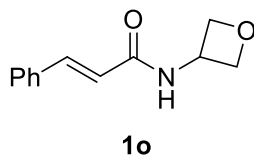

**N-(Oxetan-3-yl)cinnamamide (1o)** was prepared by following the same procedure for the synthesis of **1a** (89% yield, white solid).

<sup>1</sup>H NMR (400 MHz, CDCl<sub>3</sub>) δ 7.65 (d, *J* = 14.6 Hz, 1H), 7.50–7.45 (m, 2H), 7.36–7.34 (m, 3H), 6.61 (br s, 1H), 6.45 (d, *J* = 14.6 Hz, 1H), 5.23–5.16 (m, 1H), 4.98 (t, *J* = 7.2 Hz, 2H), 4.58 (t, *J* = 6.8 Hz, 2H) ppm.

<sup>13</sup>C NMR (100 MHz, CDCl<sub>3</sub>) δ 165.5, 142.0, 134.5, 129.9, 128.8, 127.8, 119.7, 78.5, 44.9 ppm.

IR (thin film) 3445, 3274, 2954, 2875, 1624, 1561, 1355, 1232, 978, 860, 728, 675 cm<sup>-1</sup>.

HRMS (CI<sup>+</sup>) Calcd for C<sub>12</sub>H<sub>14</sub>NO<sub>2</sub> [M + H]<sup>+</sup>: 204.1025, Found: 204.1024.

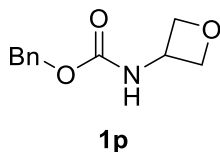

**Benzyl oxetan-3-ylcarbamate (1p)** was prepared by following the same procedure for the synthesis of **1a** (75% yield, white solid).

$^1\text{H NMR}$  (400 MHz,  $\text{CDCl}_3$ )  $\delta$  7.37–7.31 (m, 5H), 5.58 (br s, 1H), 5.10 (s, 2H), 4.87 (br s, 3H), 4.49 (br s, 2H) ppm.

$^{13}\text{C NMR}$  (100 MHz,  $\text{CDCl}_3$ )  $\delta$  155.3, 136.1, 128.5, 128.2, 128.1, 78.6, 66.9, 46.1 ppm.

**IR** (thin film) 3516, 3310, 3067, 2960, 2881, 1704, 1541, 1262, 1045, 971, 743, 699  $\text{cm}^{-1}$ .

**HRMS** (CI+) Calcd for  $\text{C}_{11}\text{H}_{14}\text{NO}_3$   $[\text{M} + \text{H}]^+$ : 208.0974, Found: 208.0976.

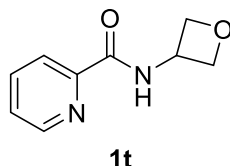

**N-(Oxetan-3-yl)picolinamide (1t)** was prepared by following the same procedure for the synthesis of **1i** (64% yield, white solid).

$^1\text{H NMR}$  (400 MHz,  $\text{CDCl}_3$ )  $\delta$  8.57 (d,  $J = 4.4$  Hz, 2H), 8.17 (d,  $J = 7.6$  Hz, 1H), 7.85 (td,  $J_1 = 8.0$  Hz,  $J_2 = 1.6$  Hz, 1H), 7.47–7.44 (m, 1H), 5.31–5.24 (m, 1H), 5.00 (t,  $J = 7.2$  Hz, 2H), 4.68 (t,  $J = 6.8$  Hz, 2H) ppm.

$^{13}\text{C NMR}$  (100 MHz,  $\text{CDCl}_3$ )  $\delta$  163.8, 149.2, 148.1, 137.5, 126.5, 122.3, 78.5, 44.5 ppm.

**IR** (thin film) 3448, 3333, 3056, 2953, 2885, 1658, 1528, 967, 752, 692  $\text{cm}^{-1}$ .

**HRMS** (CI+) Calcd for  $\text{C}_9\text{H}_{11}\text{N}_2\text{O}_2$   $[\text{M} + \text{H}]^+$ : 179.0821, Found: 179.0815.

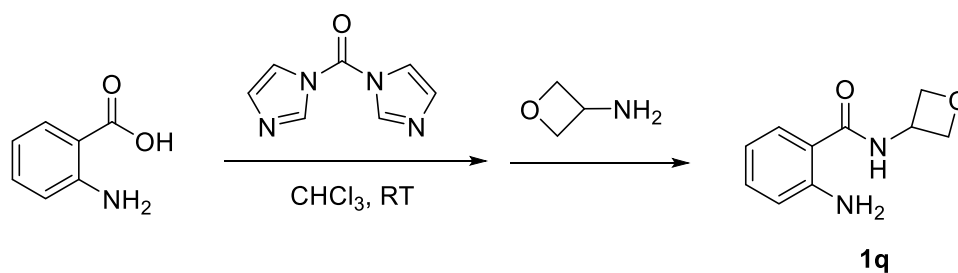

**2-Amino-N-(oxetan-3-yl)benzamide (1q)**. A mixture of 2-aminobenzoic acid (823 mg, 6.0 mmol) and 1,1'-carbonyldiimidazole (973 mg, 6.0 mmol) in chloroform (20 mL) was stirred at room temperature for 1 h. Then, a solution of oxetan-3-amine (439 mg, 6.0 mmol) in chloroform (5 mL) was added dropwise. After stirring overnight, the mixture was diluted with  $\text{CH}_2\text{Cl}_2$  (40 mL), washed with water (2×20 mL) and brine (20 mL), dried over anhydrous  $\text{Na}_2\text{SO}_4$ , and concentrated under reduced pressure.

The residue was purified by simple recrystallization (hexanes and diethyl ether) to afford the pure amide **1q** (63% yield, white solid).

<sup>1</sup>H NMR (400 MHz, CDCl<sub>3</sub>) δ 7.36 (dd, *J*<sub>1</sub> = 7.6 Hz, *J*<sub>2</sub> = 1.2 Hz, 1H), 7.23 (td, *J*<sub>1</sub> = 6.8 Hz, *J*<sub>2</sub> = 1.6 Hz, 1H), 6.69–6.65 (m, 2H), 6.60 (br s, 1H), 5.54 (br s, 2H), 5.22–5.13 (m, 1H), 5.00 (t, *J* = 7.2 Hz, 2H), 4.59 (t, *J* = 6.4 Hz, 2H) ppm.

<sup>13</sup>C NMR (100 MHz, CDCl<sub>3</sub>) δ 168.9, 148.9, 132.8, 127.1, 117.5, 116.7, 114.9, 78.6, 45.0 ppm.

IR (thin film) 3453, 3256, 2945, 1625, 1530, 1258, 970, 731, 681 cm<sup>-1</sup>.

HRMS (CI<sup>+</sup>) Calcd for C<sub>10</sub>H<sub>13</sub>N<sub>2</sub>O<sub>2</sub> [M + H]<sup>+</sup>: 193.0977, Found: 193.0979.

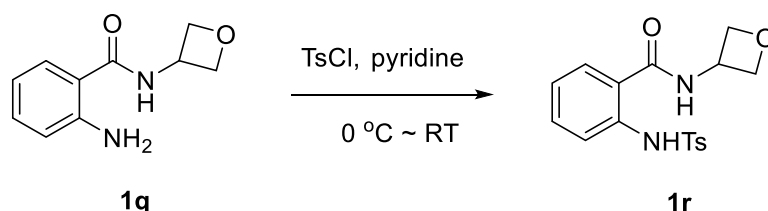

**2-(4-Methylphenylsulfonamido)-N-(oxetan-3-yl)benzamide (1r).** At 0 °C, to a stirred solution of **1q** (288 mg, 1.5 mmol) in anhydrous pyridine (5 mL) was added *p*-tosyl chloride (343 mg, 1.8 mmol) in three portions. After stirring at room temperature overnight, the mixture was diluted with ethyl acetate (30 mL), and washed with HCl aqueous solution (2 M, 2×15 mL), water (15 mL), and brine (15 mL). The organic layer was dried over anhydrous Na<sub>2</sub>SO<sub>4</sub>, and concentrated under reduced pressure. The residue was purified by simple recrystallization (hexanes and diethyl ether) to afford the pure amide **1r** (88% yield, white solid).

<sup>1</sup>H NMR (400 MHz, acetone-*d*<sub>6</sub>) δ 11.16 (s, 1H), 8.51 (br s, 1H), 7.73 (dd, *J*<sub>1</sub> = 8.0 Hz, *J*<sub>2</sub> = 1.2 Hz, 1H), 7.69–7.62 (m, 3H), 7.48 (td, *J*<sub>1</sub> = 7.6 Hz, *J*<sub>2</sub> = 1.6 Hz, 1H), 7.30 (dd, *J*<sub>1</sub> = 8.8 Hz, *J*<sub>2</sub> = 0.8 Hz, 2H), 7.12 (td, *J*<sub>1</sub> = 7.6 Hz, *J*<sub>2</sub> = 0.8 Hz, 1H), 5.08–5.04 (m, 1H), 4.83 (t, *J* = 7.2 Hz, 2H), 4.58 (t, *J* = 6.8 Hz, 2H), 2.34 (s, 3H) ppm.

<sup>13</sup>C NMR (100 MHz, acetone-*d*<sub>6</sub>) δ 169.1, 144.8, 140.2, 137.7, 133.6, 130.6, 128.9, 128.0, 124.5, 122.0, 121.8, 77.9, 46.2, 21.5 ppm.

IR (thin film) 3410, 2964, 2883, 1635, 1537, 1332, 1264, 1158, 934, 760 cm<sup>-1</sup>.

HRMS (CI+) Calcd for C<sub>17</sub>H<sub>19</sub>N<sub>2</sub>O<sub>4</sub>S [M + H]<sup>+</sup>: 347.1066, Found: 347.1042.

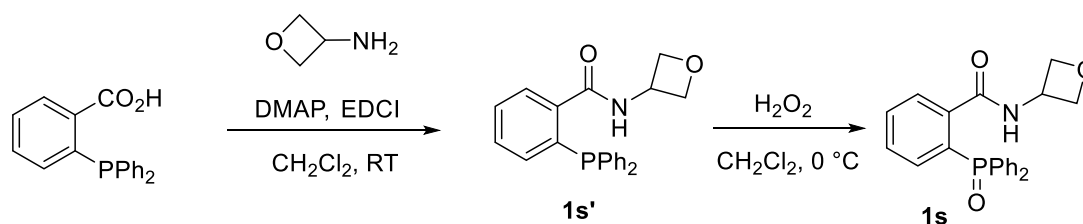

**2-(Diphenylphosphino)-N-(oxetan-3-yl)benzamide (1s')**. To a stirred solution of 2-(diphenylphosphino)benzoic acid (306 mg, 1.0 mmol), EDCI (230 mg, 1.2 mmol), and DMAP (6.1 mg, 5 mol%) in anhydrous CH<sub>2</sub>Cl<sub>2</sub> (10 mL) was added a solution of oxetan-3-amine (81 mg, 1.1 mmol) in anhydrous CH<sub>2</sub>Cl<sub>2</sub> (2 mL). After stirring at room temperature overnight, the mixture was quenched with saturated NH<sub>4</sub>Cl aqueous solution (5 mL) and diluted with CH<sub>2</sub>Cl<sub>2</sub> (10 mL). The organic layer was separated, washed with water (2×10 mL) and brine (10 mL), dried over anhydrous Na<sub>2</sub>SO<sub>4</sub>, and concentrated under reduced pressure. The residue was purified by simple recrystallization (hexanes and diethyl ether) to afford the pure amide **1s'** (78% yield, white solid).

<sup>1</sup>H NMR (400 MHz, CDCl<sub>3</sub>) δ 7.63–7.60 (m, 1H), 7.39–7.27 (m, 12H), 6.96–6.93 (m, 1H), 6.67 (br s, 1H), 5.06–4.97 (m, 1H), 4.79 (t, *J* = 7.2 Hz, 2H), 4.29 (t, *J* = 6.4 Hz, 2H) ppm.

<sup>13</sup>C NMR (100 MHz, CDCl<sub>3</sub>) δ 168.4, 140.3 (d, *J* = 24.3 Hz), 136.4 (d, *J* = 9.9 Hz), 135.8 (d, *J* = 20.1 Hz), 133.88 (d, *J* = 20.0 Hz), 133.93, 130.5, 129.1, 128.8, 128.7 (d, *J* = 7.2 Hz), 128.2, 128.1, 78.0, 45.0 ppm.

IR (thin film) 3265, 3058, 2962, 2877, 1642, 1537, 1298, 971, 744, 696 cm<sup>-1</sup>.

HRMS (CI+) Calcd for C<sub>22</sub>H<sub>21</sub>NO<sub>2</sub>P [M + H]<sup>+</sup>: 362.1310, Found: 362.1315.

**2-(Diphenylphosphoryl)-N-(oxetan-3-yl)benzamide (1s)**. At 0 °C, to a stirred solution of 2-(diphenylphosphino)-N-(oxetan-3-yl)benzamide **1s'** (222 mg, 0.62 mmol) in CH<sub>2</sub>Cl<sub>2</sub> (5 mL) was added 35% H<sub>2</sub>O<sub>2</sub> (0.5 mL). After stirring at 0 °C for 1 hour, the mixture was quenched with saturated Na<sub>2</sub>S<sub>2</sub>O<sub>3</sub> aqueous solution (2 mL) and diluted with CH<sub>2</sub>Cl<sub>2</sub> (10 mL). The organic layer was separated, washed with water (2×10 mL)

and brine (10 mL), dried over anhydrous  $\text{Na}_2\text{SO}_4$ , and concentrated under reduced pressure. The residue was purified by flash column chromatography (DCM/MeOH = 20:1) to afford **1s** (196 mg, 85% yield, white solid).

$^1\text{H}$  NMR (400 MHz,  $\text{CDCl}_3$ )  $\delta$  9.65 (d,  $J$  = 4.8 Hz, 1H), 8.03 (q,  $J$  = 4.0 Hz, 1H), 7.69–7.36 (m, 12H), 7.04 (dd,  $J_1$  = 14.4 Hz,  $J_2$  = 7.6 Hz, 1H), 4.69–4.54 (m, 3H), 4.34 (t,  $J$  = 6.0 Hz, 2H) ppm.

$^{13}\text{C}$  NMR (100 MHz,  $\text{CDCl}_3$ )  $\delta$  166.8 (d,  $J$  = 14.8 Hz), 140.2 (d,  $J$  = 31.2 Hz), 133.4 (d,  $J$  = 47.6 Hz), 132.7 (d,  $J$  = 8.4 Hz), 132.6 (d,  $J$  = 10.8 Hz), 132.1 (d,  $J$  = 37.6 Hz), 131.7 (d,  $J$  = 39.2 Hz), 131.4, 130.3 (d,  $J$  = 23.2 Hz), 130.1, 129.6, 128.9 (d,  $J$  = 49.2 Hz), 128.6, 77.3, 45.3 ppm.

$^{31}\text{P}$  NMR (162 MHz,  $\text{CDCl}_3$ )  $\delta$  36.51 ppm.

IR (thin film) 3230, 3056, 2960, 2878, 1650, 1543, 1437, 1302, 1118, 722, 693  $\text{cm}^{-1}$ .

HRMS (CI+) Calcd for  $\text{C}_{22}\text{H}_{21}\text{NO}_3\text{P}$  [ $\text{M} + \text{H}$ ] $^+$ : 378.1259, Found: 378.1265.

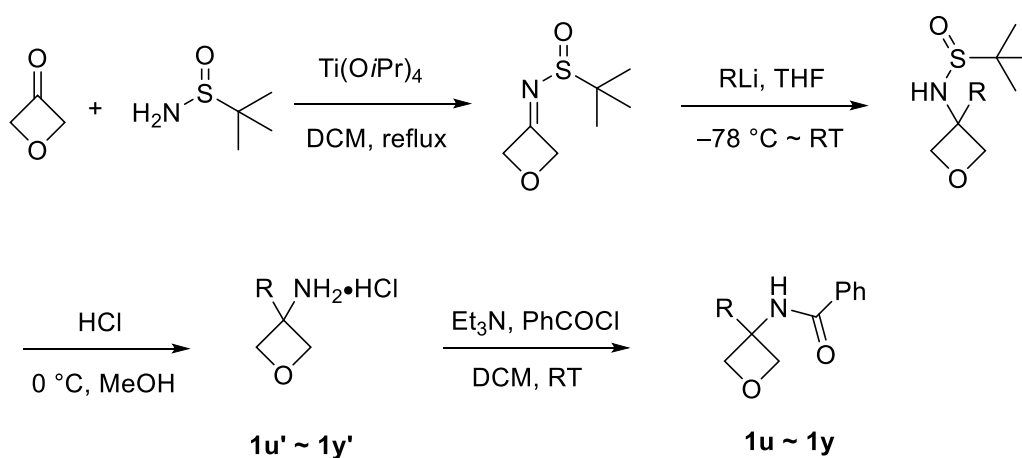

The precursors **1u'** ~ **1y'** were synthesized according to the reported procedure.<sup>[1]</sup> Their spectroscopic data were consistent with those reported in the literature. The starting materials **1u** ~ **1y** were synthesized by following the same procedure for the synthesis of **1i**.

[1] P. J. Hamzik and J. D. Brubaker, *Org. Lett.* **2010**, *12*, 1116–1119.

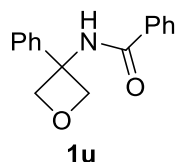

**N-(3-Phenyloxetan-3-yl)benzamide (1u)** was prepared from **1u'** by following the same procedure for the synthesis of **1a** (65% yield, white solid).

<sup>1</sup>H NMR (400 MHz, CDCl<sub>3</sub>) δ 7.81 (d, *J* = 7.2 Hz, 2H), 7.57–7.49 (m, 3H), 7.46–7.34 (m, 4H), 7.33–7.24 (m, 1H), 7.17 (s, 1H), 5.10 (d, *J* = 6.8 Hz, 2H), 4.95 (d, *J* = 6.8 Hz, 2H) ppm.

<sup>13</sup>C NMR (100 MHz, CDCl<sub>3</sub>) δ 166.6, 141.3, 133.6, 132.0, 128.7 (2C), 127.6, 127.0, 124.8, 83.0, 59.2 ppm.

IR (thin film) 3300, 2960, 1636, 1527, 1489, 1265, 982, 732, 698 cm<sup>-1</sup>.

HRMS (CI<sup>+</sup>) Calcd for C<sub>16</sub>H<sub>16</sub>NO<sub>2</sub> [M + H]<sup>+</sup>: 254.1181, Found: 254.1183.

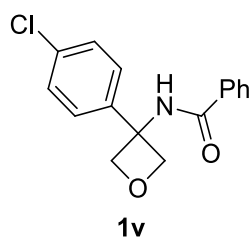

**N-(3-(4-Chlorophenyl)oxetan-3-yl)benzamide (1v)** was prepared from **1v'** by following the same procedure for the synthesis of **1a** (75% yield, white solid).

<sup>1</sup>H NMR (400 MHz, CDCl<sub>3</sub>) δ 7.80 (d, *J* = 7.2 Hz, 2H), 7.55 (t, *J* = 7.6 Hz, 1H), 7.50–7.39 (m, 4H), 7.33 (d, *J* = 8.4 Hz, 2H), 7.16 (s, 1H), 5.07 (d, *J* = 6.8 Hz, 2H), 4.90 (d, *J* = 6.8 Hz, 2H) ppm.

<sup>13</sup>C NMR (100 MHz, CDCl<sub>3</sub>) δ 166.6, 139.9, 133.5, 133.3, 132.1, 128.8, 128.7, 127.0, 126.3, 82.9, 58.9 ppm

IR (thin film) 3283, 2960, 1633, 1526, 1484, 1310, 1098, 980, 826, 734, 692 cm<sup>-1</sup>.

HRMS (CI<sup>+</sup>) Calcd for C<sub>16</sub>H<sub>15</sub>ClNO<sub>2</sub> [M + H]<sup>+</sup>: 288.0791, Found: 288.0790.

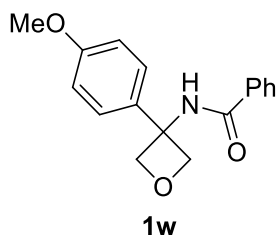

**N-(3-(4-Methoxyphenyl)oxetan-3-yl)benzamide (1w)** was prepared from **1w'** by following the same procedure for the synthesis of **1a** (82% yield, white solid).

<sup>1</sup>H NMR (400 MHz, CDCl<sub>3</sub>) δ 7.80 (d, *J* = 7.2 Hz, 2H), 7.53–7.36 (m, 5H), 7.28–7.22 (m, 1H), 6.88 (d, *J* = 6.4 Hz, 2H), 5.08 (d, *J* = 6.4 Hz, 2H), 4.91 (d, *J* = 6.4 Hz, 2H), 3.79 (s, 3H) ppm.

<sup>13</sup>C NMR (100 MHz, CDCl<sub>3</sub>) δ 166.6, 158.9, 133.7, 133.5, 131.9, 128.6, 127.0, 126.1, 114.0, 83.0, 58.9, 55.3 ppm.

IR (thin film) 3318, 2956, 1628, 1531, 1478, 1248, 1030, 982, 735, 715 cm<sup>-1</sup>.

HRMS (CI<sup>+</sup>) Calcd for C<sub>17</sub>H<sub>18</sub>NO<sub>3</sub> [M + H]<sup>+</sup>: 284.1287, Found: 284.1276.

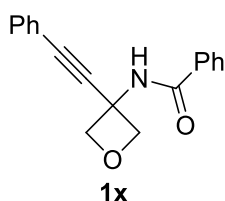

**N-(3-(Phenylethynyl)oxetan-3-yl)benzamide (1x)** was prepared from **1x'** by following the same procedure for the synthesis of **1a** (78% yield, white solid).

<sup>1</sup>H NMR (400 MHz, CDCl<sub>3</sub>) δ 7.84 (d, *J* = 7.2 Hz, 2H), 7.55–7.24 (m, 8H), 7.14 (s, 1H), 5.05 (d, *J* = 6.4 Hz, 2H), 5.00 (d, *J* = 6.4 Hz, 2H) ppm.

<sup>13</sup>C NMR (100 MHz, CDCl<sub>3</sub>) δ 166.8, 133.4, 132.0, 131.8, 128.6, 128.5, 128.2, 127.1, 122.2, 87.7, 84.4, 81.7, 50.4 ppm.

IR (thin film) 3289, 2957, 1636, 1520, 1487, 1293, 985, 756, 699 cm<sup>-1</sup>.

HRMS (CI<sup>+</sup>) Calcd for C<sub>18</sub>H<sub>16</sub>NO<sub>2</sub> [M + H]<sup>+</sup>: 278.1181, Found: 278.1168.



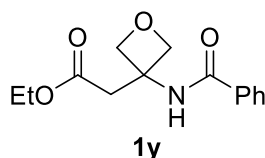

**Ethyl 2-(3-Benzamidooxetan-3-yl)acetate (1y)** was prepared from **1y'** by following the same procedure for the synthesis of **1a** (74% yield, yellow oil).

<sup>1</sup>H NMR (400 MHz, CDCl<sub>3</sub>) δ 7.76–7.70 (m, 2H), 7.52–7.43 (m, 1H), 7.42–7.33 (m, 2H), 7.18 (s, 1H), 4.84 (d, *J* = 7.2 Hz, 2H), 4.61 (d, *J* = 7.2 Hz, 2H), 4.08 (q, *J* = 7.2 Hz, 2H), 3.27 (s, 2H), 1.20 (t, *J* = 7.2 Hz, 3H) ppm.

<sup>13</sup>C NMR (100 MHz, CDCl<sub>3</sub>) δ 171.2, 166.6, 133.6, 131.7, 128.5, 126.9, 80.2, 60.7, 54.5, 39.7, 14.0 ppm.

IR (thin film) 3305, 2979, 1726, 1638, 1524, 1482, 1196, 1027, 731, 692 cm<sup>-1</sup>.

HRMS (CI<sup>+</sup>) Calcd for C<sub>14</sub>H<sub>18</sub>NO<sub>4</sub> [M + H]<sup>+</sup>: 264.1236, Found: 264.1228.

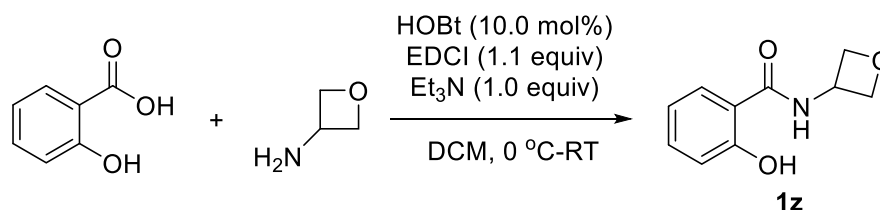

**2-Hydroxy-N-(oxetan-3-yl)benzamide (1z)**. At 0 °C, to a solution of oxetan-3-amine (2.0 mL, 28.6 mmol), salicylic acid (3.60 g, 26 mmol), HOBT (354 mg, 2.6 mmol), and Et<sub>3</sub>N (3.6 mL, 26 mmol) in CH<sub>2</sub>Cl<sub>2</sub> (75 mL) was added a solution of EDCI (5.48 g, 28.6 mmol) in CH<sub>2</sub>Cl<sub>2</sub> (75 mL). After stirring at 6 °C for 12 h, CH<sub>2</sub>Cl<sub>2</sub> was removed in vacuo and the residue was dissolved in EtOAc (100 mL). The resulting solution was washed with an aqueous solution of HCl (80 mL, 1 M), a saturated aqueous solution of NaHCO<sub>3</sub> (2 × 100 mL), and brine (100 mL), dried over Na<sub>2</sub>SO<sub>4</sub> and concentrated. The residue was purified by simple recrystallization (hexanes and diethyl ether) to afford the pure amide **1z** (4.1 g, 82% yield, white solid).

<sup>1</sup>H NMR (400 MHz, CDCl<sub>3</sub>) δ 12.0 (s, 1H), 7.46–7.38 (m, 2H), 7.01–6.85 (m, 3H), 5.25–5.15 (m, 1H), 5.03 (t, *J* = 7.2 Hz, 2H), 4.64 (t, *J* = 6.4 Hz, 2H).

$^{13}\text{C}$  NMR (100 MHz,  $\text{CDCl}_3$ )  $\delta$  169.7, 161.6, 134.7, 125.5, 118.8, 118.7, 113.6, 78.1, 45.0 ppm.

IR (thin film) 3329, 2960, 2882, 1635, 1593, 1545, 1493, 1378, 1231, 955  $\text{cm}^{-1}$ .

HRMS (CI+) Calcd for  $\text{C}_{10}\text{H}_{12}\text{NO}_3$   $[\text{M} + \text{H}]^+$ : 194.0812, Found: 194.0811.

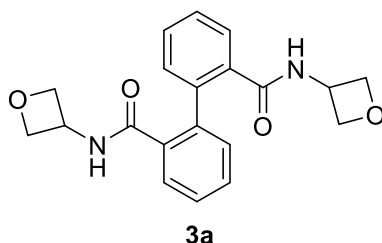

*N,N'*-Di(oxetan-3-yl)-[1,1'-biphenyl]-2,2'-dicarboxamide (**3a**) was prepared by following the same procedure for the synthesis of **1i** (white solid, 80% yield).

$^1\text{H}$  NMR (400 MHz,  $\text{CDCl}_3$ )  $\delta$  8.10-7.98 (m, 2H), 7.58-7.52 (m, 2H), 7.45-7.34 (m, 4H), 7.10-7.01 (m, 2H), 4.97-4.88 (m, 2H), 4.82-4.74 (m, 2H), 4.73-4.66 (m, 2H), 4.34 (t,  $J = 6.4$  Hz 2H), 3.98 (t,  $J = 6.4$  Hz 2H) ppm.

$^{13}\text{C}$  NMR (100 MHz,  $\text{CDCl}_3$ )  $\delta$  169.6, 138.9, 135.5, 129.9, 129.4, 128.1, 126.9, 78.0, 77.9, 44.8 ppm.

IR (thin film) 3490, 3242, 3056, 2960, 2876, 1634, 1545, 1484, 1329, 972, 879, 758, 731  $\text{cm}^{-1}$ .

HRMS (CI+) Calcd for  $\text{C}_{20}\text{H}_{21}\text{N}_2\text{O}_4$   $[\text{M} + \text{H}]^+$ : 353.1501, Found: 353.1495.

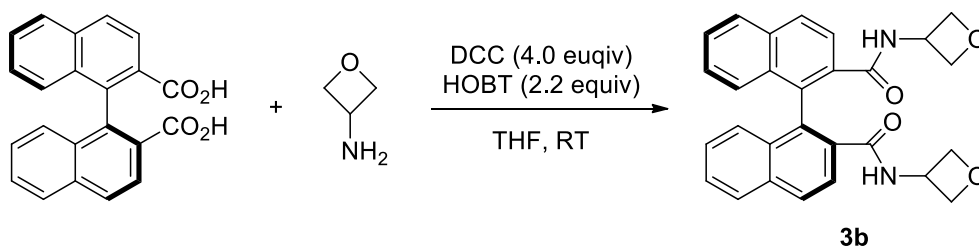

(*S*)-*N,N'*-Di(oxetan-3-yl)-[1,1'-binaphthalene]-2,2'-dicarboxamide (**3b**). To a stirred solution of (*S*)-[1,1'-binaphthalene]-2,2'-dicarboxylic acid (513 mg, 1.5 mmol), DCC (810 mg, 6.0 mmol), and HOBT (680 mg, 3.3 mmol) in anhydrous THF (20 mL) was added a solution of oxetan-3-amine (243 mg, 3.3 mmol) in anhydrous THF (4 mL). After stirring at room temperature overnight, the mixture was quenched with

saturated NH<sub>4</sub>Cl aqueous solution (10 mL) and diluted with CH<sub>2</sub>Cl<sub>2</sub> (20 mL). The layers were separated, and the organic layer was washed with water (2×20 mL) and brine (20 mL), dried over anhydrous Na<sub>2</sub>SO<sub>4</sub>, and concentrated under reduced pressure. The residue was purified by flash column chromatography (1→3% MeOH in DCM) to afford the pure amide **3b** (500 mg, 73% yield, white solid).

$[\alpha]_{\text{D}}^{25} = -250.0$  (*c* 1.0, CHCl<sub>3</sub>).

<sup>1</sup>H NMR (400 MHz, CDCl<sub>3</sub>) δ 8.03 (d, *J* = 8.4 Hz, 2H), 7.93 (d, *J* = 8.4 Hz, 2H), 7.78 (d, *J* = 8.0 Hz, 2H), 7.69 (d, *J* = 8.4 Hz, 2H), 7.52 (td, *J*<sub>1</sub> = 7.2 Hz, *J*<sub>2</sub> = 0.8 Hz, 2H), 7.32 (td, *J*<sub>1</sub> = 8.4 Hz, *J*<sub>2</sub> = 1.2 Hz, 2H), 7.21 (d, *J* = 8.4 Hz, 2H), 4.53 (t, *J* = 6.8 Hz, 2H), 4.52 (t, *J* = 6.8 Hz, 2H), 3.85 (t, *J* = 6.4 Hz, 2H), 3.76 (t, *J* = 6.4 Hz, 2H) ppm.

<sup>13</sup>C NMR (100 MHz, CDCl<sub>3</sub>) δ 169.9, 134.5, 134.0, 133.0, 132.1, 129.2, 128.9, 127.5, 127.4, 126.2, 123.4, 77.8, 44.5 ppm.

IR (thin film) 3238, 3055, 2958, 2875, 1636, 1549, 971 cm<sup>-1</sup>.

HRMS (CI<sup>+</sup>) Calcd for C<sub>28</sub>H<sub>25</sub>N<sub>2</sub>O<sub>4</sub> [M + H]<sup>+</sup>: 453.1809, Found: 453.1806.

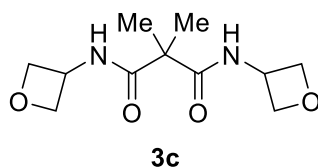

**2,2-Dimethyl-N<sup>1</sup>,N<sup>3</sup>-di(oxetan-3-yl)malonamide (3c)** was prepared by following the same procedure for the synthesis of **1i** (white solid, 25% yield).

<sup>1</sup>H NMR (400 MHz, CDCl<sub>3</sub>) δ 7.19 (d, *J* = 4.8 Hz, 2H), 5.01-4.87 (m, 6H), 4.47 (t, *J* = 6.4 Hz, 4H), 1.47 (s, 6H) ppm.

<sup>13</sup>C NMR (100 MHz, CDCl<sub>3</sub>) δ 173.1, 78.1, 49.0, 45.1, 23.9 ppm.

IR (thin film) 3292, 3039, 2968, 2873, 1633, 1519, 1274, 1206, 970 cm<sup>-1</sup>.

HRMS (CI<sup>+</sup>) Calcd for C<sub>11</sub>H<sub>19</sub>N<sub>2</sub>O<sub>4</sub> [M + H]<sup>+</sup>: 243.1339, Found: 243.1355.

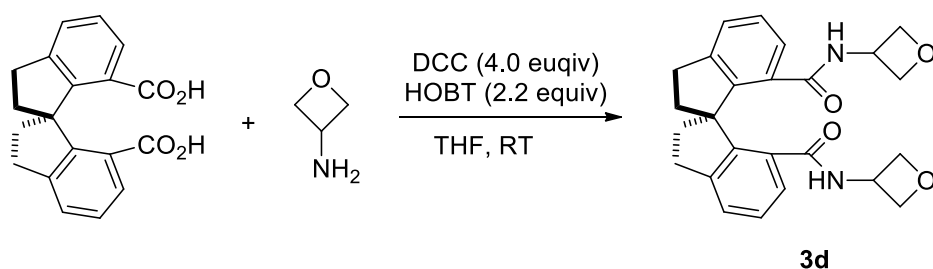

**(R)-N',N'-Di(oxetan-3-yl)-2,2',3,3'-tetrahydro-1,1'-spirobi[indene]-7,7'-dicarboxamide (3d).** To a stirred solution of (R)-2,2',3,3'-tetrahydro-1,1'-spirobi[indene]-7,7'-dicarboxylic acid (185 mg, 0.6 mmol), DCC (495 mg, 2.4 mmol), and HOBT (270 mg, 1.32 mmol) in anhydrous THF (10 mL) was added oxetan-3-amine (96 mg, 1.32 mmol) in anhydrous THF (2 mL). After stirring at room temperature overnight, the mixture was quenched with saturated NH<sub>4</sub>Cl aqueous solution (5 mL) and diluted with CH<sub>2</sub>Cl<sub>2</sub> (10 mL). The layers were separated, and the organic layer was washed with water (2×10 mL) and brine (10 mL), dried over anhydrous Na<sub>2</sub>SO<sub>4</sub>, and concentrated under reduced pressure. The residue was purified by flash column chromatography (1→3% MeOH in DCM) to afford the pure amide **3d** (253 mg, 95% yield, white solid).

$[\alpha]_D^{25} = +73.5$  (*c* 1.0, CHCl<sub>3</sub>).

<sup>1</sup>H NMR (400 MHz, CDCl<sub>3</sub>) δ 7.32–7.19 (m, 6H), 7.08 (d, *J* = 7.2 Hz, 2H), 4.67 (t, *J* = 6.8 Hz, 2H), 4.60–4.46 (m, 4H), 4.19 (t, *J* = 6.0 Hz, 2H), 3.89 (d, *J* = 6.0 Hz, 2H), 3.09–2.94 (m, 4H), 2.50–2.38 (m, 2H), 2.37–2.27 (m, 2H) ppm.

<sup>13</sup>C NMR (100 MHz, CDCl<sub>3</sub>) δ 170.0, 144.7, 144.6, 133.7, 127.2, 125.8, 125.7, 77.4, 61.4, 44.6, 40.1, 30.5 ppm.

IR (thin film) 3245, 3058, 2932, 1637, 1538, 1268, 1113, 968 cm<sup>-1</sup>.

HRMS (CI+) Calcd for C<sub>25</sub>H<sub>27</sub>N<sub>2</sub>O<sub>4</sub> [M + H]<sup>+</sup>: 419.1965, Found: 419.1979.

### III. Catalytic Synthesis of Oxazolines

#### General Procedure A.

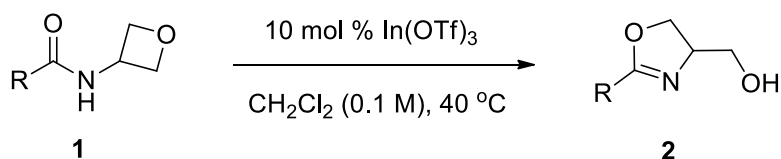

At room temperature under  $\text{N}_2$ , to a solution of oxetane **1** (0.50 mmol) in dichloromethane (5.0 mL) was added indium(III) trifluoromethanesulfonate (28.1 mg, 10 mol%). The mixture was heated to 40 °C and kept stirring at the same temperature for a specified period of time before it was quenched with an aqueous solution of NaOH (3 mL, 10% solution) and stirred for 10 min. The mixture was then diluted with water (5 mL), and extracted with dichloromethane (2×15 mL). The combined organic layers were washed with water and brine, dried over anhydrous  $\text{Na}_2\text{SO}_4$ , and concentrated under reduced pressure. The residue was purified by silica gel column chromatography to afford the desired oxazoline **2**.

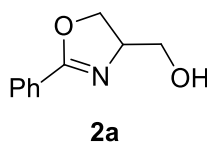

**(2-Phenyl-4,5-dihydrooxazol-4-yl)methanol (2a)** was prepared from oxetane **1a** (reaction time: 24 h) according to the General Procedure A (purification by flash column chromatography: 50% EtOAc in hexanes→EtOAc, 82.6 mg, white solid, 93% yield).

$^1\text{H NMR}$  (400 MHz,  $\text{CDCl}_3$ )  $\delta$  7.79 (d,  $J = 8.4$  Hz, 2H), 7.43–7.38 (m, 1H), 7.30 (t,  $J = 7.6$  Hz, 2H), 4.44–4.38 (m, 1H), 3.37–4.30 (m, 2H), 4.08 (br s, 1H), 3.92 (dd,  $J_1 = 11.6$  Hz,  $J_2 = 3.2$  Hz, 1H), 3.64 (dd,  $J_1 = 11.6$  Hz,  $J_2 = 3.6$  Hz, 1H) ppm.

$^{13}\text{C NMR}$  (100 MHz,  $\text{CDCl}_3$ )  $\delta$  165.4, 131.4, 128.2, 128.1, 127.0, 69.2, 67.9, 63.5 ppm.

**IR** (thin film) 3380, 2912, 1645, 1455, 1363, 1100, 1060, 967, 695  $\text{cm}^{-1}$ .

**HRMS** (CI<sup>+</sup>) Calcd for  $\text{C}_{10}\text{H}_{12}\text{NO}_2$  [ $\text{M} + \text{H}$ ]<sup>+</sup>: 178.0868, Found: 178.0866.

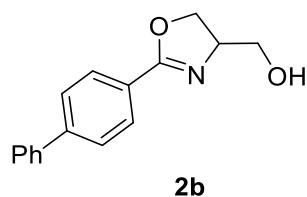

**(2-([1,1'-Biphenyl]-4-yl)-4,5-dihydrooxazol-4-yl)methanol (2b)** was prepared from oxetane **1k** (reaction time: 36 h) according to the General Procedure A (purification by flash column chromatography: 5% MeOH in dichloromethane, 111.5 mg, white solid, 88% yield).

<sup>1</sup>H NMR (400 MHz, CDCl<sub>3</sub>) δ 7.92 (d, *J* = 8.4 Hz, 2H), 7.61–7.56 (m, 4H), 7.46 (t, *J* = 7.6 Hz, 2H), 7.38 (t, *J* = 7.2 Hz, 1H), 4.53–4.36 (m, 3H), 4.00 (dd, *J*<sub>1</sub> = 11.6 Hz, *J*<sub>2</sub> = 2.8 Hz, 1H), 3.69 (dd, *J*<sub>1</sub> = 11.6 Hz, *J*<sub>2</sub> = 3.2 Hz, 1H), 3.31 (br s, 1H) ppm.

<sup>13</sup>C NMR (100 MHz, CDCl<sub>3</sub>) δ 165.4, 144.2, 140.1, 128.9, 128.8, 127.9, 127.1, 126.9, 126.0, 69.2, 68.1, 63.9 ppm.

IR (thin film) 3419, 1638, 1480, 1400, 1371, 1094, 1068, 979, 848, 737, 690 cm<sup>-1</sup>.

HRMS (CI<sup>+</sup>) Calcd for C<sub>16</sub>H<sub>16</sub>NO<sub>2</sub> [M + H]<sup>+</sup>: 254.1181, Found: 254.1187.

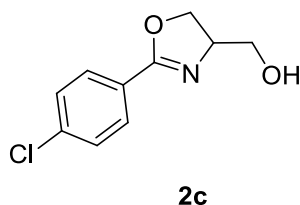

**(2-(4-Chlorophenyl)-4,5-dihydrooxazol-4-yl)methanol (2c)** was prepared from oxetane **1c** (reaction time: 36 h) according to the General Procedure A (purification by flash column chromatography: 67% EtOAc in hexanes→EtOAc, 97.6 mg, white solid, 92% yield).

<sup>1</sup>H NMR (400 MHz, CDCl<sub>3</sub>) δ 7.77 (d, *J* = 8.4 Hz, 2H), 7.31 (d, *J* = 8.8 Hz, 2H), 4.49 (dd, *J*<sub>1</sub> = 8.8 Hz, *J*<sub>2</sub> = 6.4 Hz, 1H), 4.44–4.34 (m, 2H), 3.97 (dd, *J*<sub>1</sub> = 11.6 Hz, *J*<sub>2</sub> = 3.2 Hz, 1H), 3.65 (dd, *J*<sub>1</sub> = 11.6 Hz, *J*<sub>2</sub> = 3.6 Hz, 1H), 3.24 (br s, 1H) ppm.

<sup>13</sup>C NMR (100 MHz, CDCl<sub>3</sub>) δ 164.7, 137.8, 129.7, 128.6, 125.5, 69.4, 68.0, 63.6 ppm.

IR (thin film) 3428, 3034, 2905, 1639, 1403, 1355, 1266, 1085, 958, 837, 732 cm<sup>-1</sup>.

HRMS (CI<sup>+</sup>) Calcd for C<sub>10</sub>H<sub>11</sub>ClNO<sub>2</sub> [M + H]<sup>+</sup>: 212.0478, Found: 212.0481.

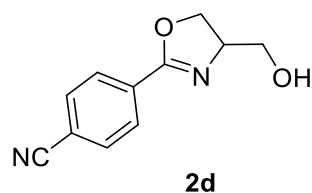

**4-(4-(Hydroxymethyl)-4,5-dihydrooxazol-2-yl)benzonitrile (2d)** was prepared from oxetane **1f** (reaction time: 36 h) according to the General Procedure A (purification by flash column chromatography: 67% EtOAc in hexanes→EtOAc, 89.4 mg, white solid, 88% yield).

<sup>1</sup>H NMR (400 MHz, CDCl<sub>3</sub>) δ 7.92 (d, *J* = 8.4 Hz, 2H), 7.62 (d, *J* = 8.4 Hz, 2H), 4.52 (dd, *J*<sub>1</sub> = 8.8 Hz, *J*<sub>2</sub> = 6.4 Hz, 1H), 4.47–4.37 (m, 2H), 3.97 (dd, *J*<sub>1</sub> = 11.6 Hz, *J*<sub>2</sub> = 3.2 Hz, 1H), 3.67 (dd, *J*<sub>1</sub> = 11.6 Hz, *J*<sub>2</sub> = 3.6 Hz, 1H), 3.15 (br s, 1H) ppm.

<sup>13</sup>C NMR (100 MHz, CDCl<sub>3</sub>) δ 163.8, 132.0, 131.1, 128.8, 118.0, 114.9, 69.6, 68.2, 63.4 ppm.

IR (thin film) 3429, 2915, 2228, 1641, 1408, 1361, 1091, 963, 852, 675 cm<sup>-1</sup>.

HRMS (CI<sup>+</sup>) Calcd for C<sub>11</sub>H<sub>11</sub>N<sub>2</sub>O<sub>2</sub> [M + H]<sup>+</sup>: 203.0821, Found: 203.0820.

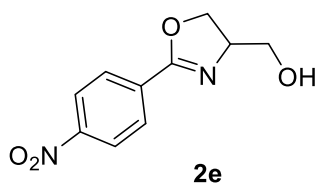

**(2-(4-Nitrophenyl)-4,5-dihydrooxazol-4-yl)methanol (2e)** was prepared from oxetane **1g** (reaction time: 36 h) according to the General Procedure A (purification by flash column chromatography: 5% MeOH in dichloromethane, 100.1 mg, white solid, 90% yield).

<sup>1</sup>H NMR (400 MHz, CDCl<sub>3</sub>) δ 8.21 (d, *J* = 8.8 Hz, 2H), 8.05 (d, *J* = 8.8 Hz, 2H), 4.57 (dd, *J*<sub>1</sub> = 9.6 Hz, *J*<sub>2</sub> = 7.2 Hz, 1H), 4.52–4.47 (m, 1H), 4.43 (dd, *J*<sub>1</sub> = 11.6 Hz, *J*<sub>2</sub> = 3.2 Hz, 1H), 3.99 (dd, *J*<sub>1</sub> = 11.6 Hz, *J*<sub>2</sub> = 3.6 Hz, 1H), 3.70 (dd, *J*<sub>1</sub> = 11.6 Hz, *J*<sub>2</sub> = 4.0 Hz, 1H), 2.79 (br s, 1H) ppm.

<sup>13</sup>C NMR (100 MHz, CDCl<sub>3</sub>) δ 163.7, 149.6, 132.8, 129.4, 123.5, 69.7, 68.3, 63.6 ppm.

IR (thin film) 3406, 3236, 2924, 1649, 1600, 1522, 1346, 1265, 1093, 860, 693 cm<sup>-1</sup>.

HRMS (CI+) Calcd for C<sub>10</sub>H<sub>11</sub>N<sub>2</sub>O<sub>4</sub> [M + H]<sup>+</sup>: 223.0719, Found: 223.0716.

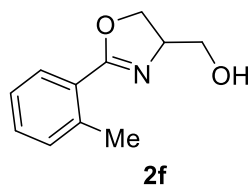

(2-(*o*-Tolyl)-4,5-dihydrooxazol-4-yl)methanol (**2f**) was prepared from oxetane **1h** (reaction time: 36 h) according to the General Procedure A (purification by flash column chromatography: 50% EtOAc in hexanes→EtOAc, 86.4 mg, colorless oil, 90% yield).

<sup>1</sup>H NMR (400 MHz, CDCl<sub>3</sub>) δ 7.71 (d, *J* = 8.0 Hz, 1H), 7.33–7.29 (m, 1H), 7.20–7.16 (m, 2H), 4.40–4.34 (m, 2H), 4.25–4.18 (m, 1H), 3.78 (dd, *J*<sub>1</sub> = 11.6 Hz, *J*<sub>2</sub> = 4.0 Hz, 1H), 3.61 (dd, *J*<sub>1</sub> = 11.6 Hz, *J*<sub>2</sub> = 4.0 Hz, 1H), 3.56 (br s, 1H), 2.49 (s, 3H) ppm.

<sup>13</sup>C NMR (100 MHz, CDCl<sub>3</sub>) δ 166.2, 138.4, 131.0, 130.6, 129.7, 126.8, 125.5, 68.9, 68.1, 63.9, 21.4 ppm.

IR (thin film) 3411, 2926, 1728, 1641, 1456, 1356, 1255, 1047, 965, 732 cm<sup>-1</sup>.

HRMS (CI+) Calcd for C<sub>11</sub>H<sub>14</sub>NO<sub>2</sub> [M + H]<sup>+</sup>: 192.1025, Found: 192.1033.

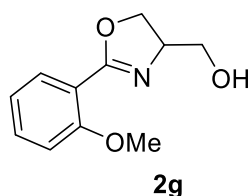

(2-(2-Methoxyphenyl)-4,5-dihydrooxazol-4-yl)methanol (**2g**) was prepared from oxetane **1i** (reaction time: 36 h) according to the General Procedure A (purification by flash column chromatography: 67% EtOAc in hexanes→EtOAc, 86.1 mg, colorless oil, 83% yield).

<sup>1</sup>H NMR (400 MHz, CDCl<sub>3</sub>) δ 7.71 (d, *J* = 8.0 Hz, 1H), 7.42–7.37 (m, 1H), 6.95–6.92 (m, 2H), 4.44–4.38 (m, 2H), 4.23 (t, *J* = 6.4 Hz, 1H), 3.89–3.84 (m, 4H), 3.63 (dd, *J*<sub>1</sub> = 11.6 Hz, *J*<sub>2</sub> = 4.0 Hz, 1H), 3.56 (br s, 1H) ppm.



$^{13}\text{C}$  NMR (100 MHz,  $\text{CDCl}_3$ )  $\delta$  164.0, 158.3, 132.5, 131.1, 120.2, 116.4, 111.5, 68.7, 68.3, 64.0, 55.8 ppm.

IR (thin film) 3455, 2939, 2844, 1720, 1641, 1538, 1490, 1360, 1249, 1050, 968  $\text{cm}^{-1}$ .

HRMS (CI+) Calcd for  $\text{C}_{11}\text{H}_{14}\text{NO}_3$   $[\text{M} + \text{H}]^+$ : 208.0974, Found: 208.0976.

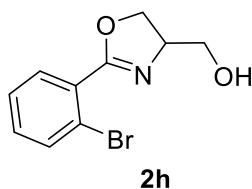

**(2-(2-Bromophenyl)-4,5-dihydrooxazol-4-yl)methanol (2h)** was prepared from oxetane **1d** (reaction time: 30 h) according to the General Procedure A (purification by flash column chromatography: 67% EtOAc in hexanes  $\rightarrow$  EtOAc, 108.9 mg, white solid, 85% yield).

$^1\text{H}$  NMR (400 MHz,  $\text{CDCl}_3$ )  $\delta$  7.61–7.59 (m, 2H), 7.33–7.23 (m, 2H), 4.47–4.37 (m, 2H), 4.28 (t,  $J = 6.0$  Hz, 1H), 3.81 (dd,  $J_1 = 11.6$  Hz,  $J_2 = 4.0$  Hz, 1H), 3.62 (dd,  $J_1 = 11.6$  Hz,  $J_2 = 4.0$  Hz, 1H), 3.32 (br s, 1H) ppm.

$^{13}\text{C}$  NMR (100 MHz,  $\text{CDCl}_3$ )  $\delta$  164.8, 133.6, 131.8, 131.1, 129.4, 127.1, 121.6, 69.7, 68.2, 63.7 ppm.

IR (thin film) 3392, 2928, 1653, 1472, 1433, 1360, 1106, 1035, 956, 762  $\text{cm}^{-1}$ .

HRMS (CI+) Calcd for  $\text{C}_{10}\text{H}_{11}\text{BrNO}_2$   $[\text{M} + \text{H}]^+$ : 255.9973, Found: 255.9976.

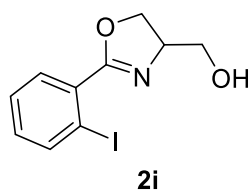

**(2-(2-Iodophenyl)-4,5-dihydrooxazol-4-yl)methanol (2i)** was prepared from oxetane **1e** (reaction time: 48 h) according to the General Procedure A (purification by flash column chromatography: 67% EtOAc in hexanes  $\rightarrow$  EtOAc, 122.6 mg, white solid, 81% yield).

$^1\text{H NMR}$  (400 MHz,  $\text{CDCl}_3$ )  $\delta$  7.92 (d,  $J = 7.6$  Hz, 1H), 7.59 (dd,  $J_1 = 7.6$  Hz,  $J_2 = 1.6$  Hz, 1H), 7.37 (td,  $J_1 = 7.6$  Hz,  $J_2 = 1.2$  Hz, 1H), 7.12 (td,  $J_1 = 7.6$  Hz,  $J_2 = 1.6$  Hz, 1H), 4.52–4.45 (m, 2H), 4.35–4.32 (m, 1H), 3.92 (dd,  $J_1 = 11.6$  Hz,  $J_2 = 3.6$  Hz, 1H), 3.67 (dd,  $J_1 = 11.6$  Hz,  $J_2 = 4.4$  Hz, 1H), 2.61 (br s, 1H) ppm.

$^{13}\text{C NMR}$  (100 MHz,  $\text{CDCl}_3$ )  $\delta$  166.0, 140.3, 133.2, 131.8, 130.5, 127.9, 94.8, 69.7, 68.3, 64.0 ppm.

IR (thin film) 3378, 2927, 1729, 1653, 1469, 1429, 1359, 1246, 1103, 1045, 955, 760  $\text{cm}^{-1}$ .

HRMS (CI+) Calcd for  $\text{C}_{10}\text{H}_{11}\text{INO}_2$  [ $\text{M} + \text{H}$ ] $^+$ : 303.9834, Found: 303.9832.

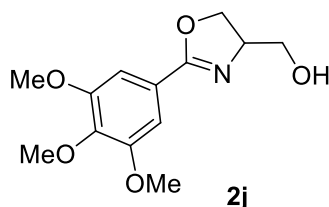

**(2-(3,4,5-Trimethoxyphenyl)-4,5-dihydrooxazol-4-yl)methanol (2j)** was prepared from oxetane **1j** (reaction time: 16 h) according to the General Procedure A (purification by flash column chromatography: 5% MeOH in dichloromethane, 115.0 mg, white solid, 86% yield).

$^1\text{H NMR}$  (400 MHz,  $\text{CDCl}_3$ )  $\delta$  7.03 (s, 2H), 4.46–4.43 (m, 1H), 4.41–4.33 (m, 2H), 4.24 (br s, 1H), 4.00 (dd,  $J_1 = 11.6$  Hz,  $J_2 = 2.8$  Hz, 1H), 3.83 (s, 9H), 3.63 (dd,  $J_1 = 11.6$  Hz,  $J_2 = 3.2$  Hz, 1H) ppm.

$^{13}\text{C NMR}$  (100 MHz,  $\text{CDCl}_3$ )  $\delta$  165.3, 152.7, 140.7, 121.9, 105.4, 69.2, 67.8, 63.3, 60.8, 56.0 ppm.

IR (thin film) 3382, 2941, 2842, 1643, 1588, 1505, 1463, 1371, 1234, 1123, 989, 855  $\text{cm}^{-1}$ .

HRMS (CI+) Calcd for  $\text{C}_{13}\text{H}_{18}\text{NO}_5$  [ $\text{M} + \text{H}$ ] $^+$ : 268.1185, Found: 268.1178.

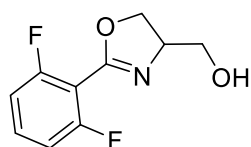

**2k**

**(2-(2,6-Difluorophenyl)-4,5-dihydrooxazol-4-yl)methanol (2k)** was prepared from oxetane **1b** (reaction time: 36 h) according to the General Procedure A (purification by flash column chromatography: 67% EtOAc in hexanes→EtOAc, 93.2 mg, white solid, 87% yield).

<sup>1</sup>H NMR (400 MHz, CDCl<sub>3</sub>) δ 7.40–7.35 (m, 1H), 6.93 (td, *J*<sub>1</sub> = 11.6 Hz, *J*<sub>2</sub> = 3.6 Hz, 2H), 4.51–4.43 (m, 2H), 4.36–4.31 (m, 1H), 3.86 (dd, *J*<sub>1</sub> = 11.6 Hz, *J*<sub>2</sub> = 3.6 Hz, 1H), 3.66 (dd, *J*<sub>1</sub> = 11.6 Hz, *J*<sub>2</sub> = 4.0 Hz, 1H), 2.95 (br s, 1H) ppm.

<sup>13</sup>C NMR (100 MHz, CDCl<sub>3</sub>) δ 161.0 (dd, *J*<sub>1</sub> = 254.6 Hz, *J*<sub>2</sub> = 5.8 Hz), 158.1, 132.4 (t like, *J* = 10.4 Hz), 111.9 (dt, *J*<sub>1</sub> = 20.2 Hz, *J*<sub>2</sub> = 2.5 Hz), 106.9 (t like, *J* = 17.4 Hz), 69.5, 68.2, 63.7 ppm.

IR (thin film) 3407, 2913, 1663, 1473, 1358, 1247, 1106, 1055, 1011, 795 cm<sup>-1</sup>.

HRMS (CI<sup>+</sup>) Calcd for C<sub>10</sub>H<sub>10</sub>F<sub>2</sub>NO<sub>2</sub> [M + H]<sup>+</sup>: 214.0680, Found: 214.0675.

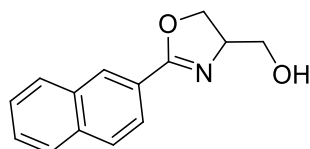

**2l**

**(2-(Naphthalen-2-yl)-4,5-dihydrooxazol-4-yl)methanol (2l)** was prepared from oxetane **1l** (reaction time: 36 h) according to the General Procedure A (purification by flash column chromatography: 67% EtOAc in hexanes→EtOAc, 102.3 mg, white solid, 90% yield).

<sup>1</sup>H NMR (400 MHz, CDCl<sub>3</sub>) δ 8.16 (s, 1H), 7.87 (dd, *J*<sub>1</sub> = 8.4 Hz, *J*<sub>2</sub> = 1.2 Hz, 1H), 7.79 (d, *J* = 8.0 Hz, 1H), 7.69 (t, *J* = 8.4 Hz, 2H), 7.52 (t, *J* = 7.2 Hz, 1H), 7.42 (t, *J* = 7.6 Hz, 1H), 4.53–4.43 (m, 3H), 4.06 (dd, *J*<sub>1</sub> = 12.0 Hz, *J*<sub>2</sub> = 2.0 Hz, 1H), 3.87 (br s, 1H), 3.72 (dd, *J*<sub>1</sub> = 12.0 Hz, *J*<sub>2</sub> = 2.8 Hz, 1H) ppm.

<sup>13</sup>C NMR (100 MHz, CDCl<sub>3</sub>) δ 165.7, 134.6, 132.4, 129.0, 128.9, 127.9, 127.6 (2C), 126.4, 124.5, 124.1, 69.3, 68.0, 63.6 ppm.

IR (thin film) 3446, 2866, 1640, 1472, 1375, 1103, 1067, 966, 750 cm<sup>-1</sup>.

HRMS (CI<sup>+</sup>) Calcd for C<sub>14</sub>H<sub>14</sub>NO<sub>2</sub> [M + H]<sup>+</sup>: 228.1025, Found: 228.1022.

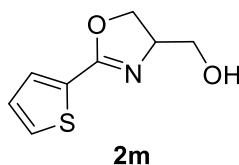

**(2-(Thiophen-2-yl)-4,5-dihydrooxazol-4-yl)methanol (2m)** was prepared from oxetane **1m** (reaction time: 36 h) according to the General Procedure A (purification by flash column chromatography: 50% EtOAc in hexanes → EtOAc, 82.4 mg, colorless oil, 90% yield).

<sup>1</sup>H NMR (400 MHz, CDCl<sub>3</sub>) δ 7.58 (dd, *J*<sub>1</sub> = 3.6 Hz, *J*<sub>2</sub> = 1.2 Hz, 1H), 7.43 (dd, *J*<sub>1</sub> = 5.2 Hz, *J*<sub>2</sub> = 1.2 Hz, 1H), 7.03 (dd, *J*<sub>1</sub> = 5.2 Hz, *J*<sub>2</sub> = 3.6 Hz, 1H), 4.48 (dd, *J*<sub>1</sub> = 8.8 Hz, *J*<sub>2</sub> = 6.4 Hz, 1H), 4.43–4.34 (m, 2H), 3.94 (dd, *J*<sub>1</sub> = 11.6 Hz, *J*<sub>2</sub> = 3.2 Hz, 1H), 3.66 (dd, *J*<sub>1</sub> = 11.6 Hz, *J*<sub>2</sub> = 3.6 Hz, 1H), 3.01 (br s, 1H) ppm.

<sup>13</sup>C NMR (100 MHz, CDCl<sub>3</sub>) δ 161.1, 130.8, 130.1, 129.6, 127.5, 69.7, 68.1, 63.5 ppm.

IR (thin film) 3375, 3104, 2919, 1642, 1525, 1430, 1372, 1061, 1032, 954, 851, 721 cm<sup>-1</sup>.

HRMS (CI<sup>+</sup>) Calcd for C<sub>8</sub>H<sub>10</sub>NO<sub>2</sub>S [M + H]<sup>+</sup>: 184.0432, Found: 184.0440.

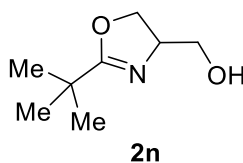

**(2-(*tert*-Butyl)-4,5-dihydrooxazol-4-yl)methanol (2n)** was prepared from oxetane **1o** (reaction time: 24 h) according to the General Procedure A (purification by flash column chromatography: 50% EtOAc in hexanes → EtOAc, 73.9 mg, colorless oil, 94% yield).

$^1\text{H NMR}$  (400 MHz,  $\text{CDCl}_3$ )  $\delta$  4.26 (dd,  $J_1 = 9.6$  Hz,  $J_2 = 7.6$  Hz, 1H), 4.19–4.13 (m, 1H), 4.05 (t like,  $J = 7.6$  Hz, 1H), 3.69 (dd,  $J_1 = 11.2$  Hz,  $J_2 = 4.4$  Hz, 1H), 3.54 (dd,  $J_1 = 11.2$  Hz,  $J_2 = 4.8$  Hz, 1H), 3.38 (br s, 1H), 1.18 (s, 9H) ppm.

$^{13}\text{C NMR}$  (100 MHz,  $\text{CDCl}_3$ )  $\delta$  176.2, 69.5, 67.4, 64.1, 33.3, 27.8 ppm.

**IR** (thin film) 3383, 2972, 2919, 1645, 1473, 1358, 1153, 1052, 977  $\text{cm}^{-1}$ .

**HRMS** (CI+) Calcd for  $\text{C}_8\text{H}_{16}\text{NO}_2$   $[\text{M} + \text{H}]^+$ : 158.1181, Found: 158.1186.

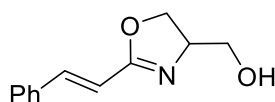

**2o**

**(E)-(2-Styryl-4,5-dihydrooxazol-4-yl)methanol (2o)** was prepared from oxetane **1n** in DCE with 20 mol% of  $\text{In}(\text{OTf})_3$  at 60 °C according to the General Procedure A (reaction time: 24 h, purification by flash column chromatography: 67% EtOAc in hexanes  $\rightarrow$  EtOAc, 100.4 mg, white solid, 99% yield).

$^1\text{H NMR}$  (400 MHz,  $\text{CDCl}_3$ )  $\delta$  7.35–7.29 (m, 5H), 7.24 (d,  $J = 16.4$  Hz, 1H), 6.54 (d,  $J = 16.0$  Hz, 1H), 4.47 (br s, 1H), 4.43–4.29 (m, 3H), 3.92 (d,  $J = 10.0$  Hz, 1H), 3.62 (d,  $J_1 = 9.6$  Hz,  $J_2 = 2.0$  Hz, 1H) ppm.

$^{13}\text{C NMR}$  (100 MHz,  $\text{CDCl}_3$ )  $\delta$  165.2, 140.6, 134.9, 129.5, 128.7, 127.5, 114.3, 68.9, 67.8, 63.3 ppm.

**IR** (thin film) 3410, 2909, 1653, 1607, 1370, 1264, 1053, 984, 760, 690  $\text{cm}^{-1}$ .

**HRMS** (CI+) Calcd for  $\text{C}_{12}\text{H}_{14}\text{NO}_2$   $[\text{M} + \text{H}]^+$ : 204.1025, Found: 204.1031.

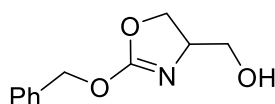

**2p**

**(2-(Benzyloxy)-4,5-dihydrooxazol-4-yl)methanol (2p)** was prepared from oxetane **1p** (reaction time: 24 h) according to the General Procedure A (purification by flash column chromatography: 50% EtOAc in hexanes, 85.2 mg, colorless oil, 82% yield). The reaction was quenched with  $\text{Et}_3\text{N}$  (0.5 mL) instead of aqueous solution of NaOH.

$^1\text{H NMR}$  (400 MHz,  $\text{CDCl}_3$ )  $\delta$  7.36–7.28 (m, 5H), 6.61 (br s, 1H), 4.51 (s, 2H), 4.39 (t,  $J$  = 8.8 Hz, 1H), 4.12 (dd,  $J_1$  = 8.8 Hz,  $J_2$  = 4.8 Hz, 1H), 4.01–3.95 (m, 1H), 3.44 (dd,  $J_1$  = 6.4 Hz,  $J_2$  = 1.2 Hz, 2H) ppm.

$^{13}\text{C NMR}$  (100 MHz,  $\text{CDCl}_3$ )  $\delta$  159.9, 137.3, 128.3, 127.8, 127.6, 73.3, 71.3, 67.2, 51.7 ppm.

**IR** (thin film) 3291, 2916, 2864, 1753, 1411, 1233, 1108, 1031, 939, 745, 703  $\text{cm}^{-1}$ .

**HRMS** (CI+) Calcd for  $\text{C}_{11}\text{H}_{14}\text{NO}_3$  [ $\text{M} + \text{H}$ ] $^+$ : 208.0974, Found: 208.0971.

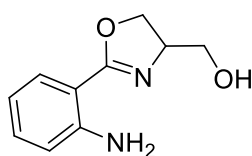

**2q**

**(2-(2-Aminophenyl)-4,5-dihydrooxazol-4-yl)methanol (2q)** was prepared from oxetane **1q** (reaction time: 18 h) according to the General Procedure A (purification by flash column chromatography: 50% EtOAc in hexanes  $\rightarrow$  EtOAc, 86.3 mg, pale yellow oil, 90% yield).

$^1\text{H NMR}$  (400 MHz,  $\text{CDCl}_3$ )  $\delta$  7.70 (d,  $J$  = 8.4 Hz, 1H), 7.20 (td,  $J_1$  = 7.6 Hz,  $J_2$  = 1.6 Hz, 1H), 6.69–6.65 (m, 2H), 4.85 (br s, 3H), 4.46–4.40 (m, 1H), 4.33 (dd,  $J_1$  = 8.0 Hz,  $J_2$  = 4.0 Hz, 1H), 4.18 (t,  $J$  = 8.0 Hz, 1H), 3.82 (dd,  $J_1$  = 11.6 Hz,  $J_2$  = 4.0 Hz, 1H), 3.61 (dd,  $J_1$  = 11.2 Hz,  $J_2$  = 4.4 Hz, 1H) ppm.

$^{13}\text{C NMR}$  (100 MHz,  $\text{CDCl}_3$ )  $\delta$  165.4, 148.4, 132.3, 129.7, 116.3, 115.8, 108.9, 68.0, 67.5, 64.2 ppm.

**IR** (thin film) 3376, 2934, 1633, 1524, 1257, 1160, 1100, 1047, 971, 749, 693  $\text{cm}^{-1}$ .

**HRMS** (CI+) Calcd for  $\text{C}_{10}\text{H}_{13}\text{N}_2\text{O}_2$  [ $\text{M} + \text{H}$ ] $^+$ : 193.0977, Found: 193.0976.

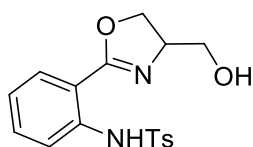

**2r**

**N-(2-(4-(Hydroxymethyl)-4,5-dihydrooxazol-2-yl)phenyl)-4-methylbenzenesulfonamide (2r)** was prepared from oxetane **1r** (reaction time: 24 h) according to the General Procedure A (purification by flash column chromatography: 67% EtOAc in hexanes→EtOAc, 161.3 mg, white solid, 93% yield). The reaction was quenched with Et<sub>3</sub>N (0.5 mL) instead of aqueous solution of NaOH.

<sup>1</sup>H NMR (400 MHz, CDCl<sub>3</sub>) δ 12.1 (br s, 1H), 7.74–7.71 (m, 3H), 7.65 (d, *J* = 8.4 Hz, 1H), 7.35 (td, *J*<sub>1</sub> = 8.4 Hz, *J*<sub>2</sub> = 1.6 Hz, 1H), 7.19 (d, *J* = 8.4 Hz, 2H), 7.01 (td, *J*<sub>1</sub> = 8.0 Hz, *J*<sub>2</sub> = 0.8 Hz, 1H), 4.53–4.48 (m, 1H), 4.40 (dd, *J*<sub>1</sub> = 9.6 Hz, *J*<sub>2</sub> = 8.0 Hz, 1H), 4.28 (t, *J* = 8.0 Hz, 1H), 3.87 (dd, *J*<sub>1</sub> = 11.6 Hz, *J*<sub>2</sub> = 4.4 Hz, 1H), 3.73 (dd, *J*<sub>1</sub> = 11.2 Hz, *J*<sub>2</sub> = 4.0 Hz, 1H), 2.35 (s, 3H), 2.15 (br s, 1H) ppm.

<sup>13</sup>C NMR (100 MHz, CDCl<sub>3</sub>) δ 165.1, 143.7, 139.1, 136.7, 132.6, 129.5 (2C), 127.0, 122.6, 118.3, 113.5, 68.3, 67.7, 63.9, 21.4 ppm.

IR (thin film) 3527, 2916, 1634, 1593, 1502, 1335, 1269, 1159, 1058, 952, 762 cm<sup>-1</sup>.

HRMS (CI<sup>+</sup>) Calcd for C<sub>17</sub>H<sub>19</sub>N<sub>2</sub>O<sub>4</sub>S [M + H]<sup>+</sup>: 347.1066, Found: 347.1076.

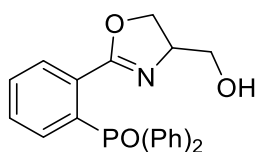

**2s**

**(2-(4-(Hydroxymethyl)-4,5-dihydrooxazol-2-yl)phenyl)diphenylphosphine oxide (2s)** was prepared from oxetane **1s** (0.3 mmol scale) in DCE with 10 mol% of In(OTf)<sub>3</sub> at 60 °C according to the General Procedure A (reaction time: 48 h, purification by flash column chromatography: DCM/MeOH = 25/1, 79 mg, white solid, 70% yield).

$^1\text{H NMR}$  (400 MHz,  $\text{CDCl}_3$ )  $\delta$  7.82-7.75 (m, 1H), 7.70-7.34 (m, 12H), 7.09 (dd,  $J_1 = 14.0$  Hz,  $J_2 = 7.6$  Hz, 1H), 5.53 (brs, 1H), 4.60-4.53 (m, 1H), 4.34-4.25 (m, 1H), 4.21-4.13 (m, 1H), 3.89-3.82 (m, 1H), 3.47-3.40 (m, 1H) ppm.

$^{13}\text{C NMR}$  (100 MHz,  $\text{CDCl}_3$ )  $\delta$  163.8, 133.4 (d,  $J = 48.4$  Hz), 133.8 (d,  $J = 139.6$  Hz), 133.2 (d,  $J = 20.8$  Hz), 132.7 (d,  $J = 134.8$  Hz), 132.2 (d,  $J = 38.0$  Hz), 132.0, 131.8 (dd,  $J_1 = 16.8$ ,  $J_2 = 11.2$  Hz), 131.5 (d,  $J = 10.4$  Hz), 130.9 (d,  $J = 40.4$  Hz), 130.6 (d,  $J = 34.0$  Hz), 129.5 (d,  $J = 50.4$  Hz), 128.5 (d,  $J = 9.2$  Hz), 128.4 (d,  $J = 12.8$  Hz), 69.4, 69.0, 63.5 ppm.

**IR** (thin film) 3290, 2926, 1663, 1588, 1482, 1437, 1354, 1177, 1111, 1043, 721, 694  $\text{cm}^{-1}$ .

$^{31}\text{P NMR}$  (162 MHz,  $\text{CDCl}_3$ )  $\delta$  33.54 ppm.

**HRMS** (CI+) Calcd for  $\text{C}_{22}\text{H}_{21}\text{N}_2\text{O}_3\text{P}$  [ $\text{M} + \text{H}$ ] $^+$ : 378.1259, Found: 378.1242.

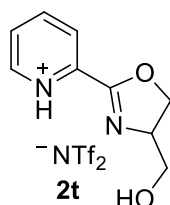

**2-(4-(Hydroxymethyl)-4,5-dihydrooxazol-2-yl)pyridin-1-ium bis((trifluoromethyl)sulfonyl)amide (2t)** was prepared from oxetane **1t** in DCM with one equivalent of  $\text{HNTf}_2$  at 40 °C according to the General Procedure A (reaction time: 12 h, purification by flash column chromatography: DCM/MeOH = 10:1, 115 mg, oil, 50% yield).

$^1\text{H NMR}$  (400 MHz,  $\text{CDCl}_3$ )  $\delta$  8.67-8.61 (m, 1H), 7.96-7.90 (m, 1H), 7.77-7.69 (m, 1H), 7.39-7.32 (m, 1H), 4.60-4.38 (m, 3H), 3.97 (dd,  $J_1 = 11.6$  Hz,  $J_2 = 3.6$  Hz 1H), 3.70 (dd,  $J_1 = 11.6$  Hz,  $J_2 = 3.6$  Hz 1H) ppm.

$^{13}\text{C NMR}$  (100 MHz,  $\text{CDCl}_3$ )  $\delta$  164.3, 149.7, 146.1, 136.7, 125.7, 123.9, 69.9, 68.4, 63.9 ppm.

$^{19}\text{F NMR}$  (376 MHz,  $\text{CDCl}_3$ )  $\delta$  -78.88 ppm.

**IR** (thin film) 3314, 2906, 1734, 1642, 1583, 1470, 1362, 1105, 1043, 959, 800, 724, 678  $\text{cm}^{-1}$ .

**HRMS** (CI+) Calcd for  $\text{C}_9\text{H}_{11}\text{N}_2\text{O}_2$  [ $\text{M} - \text{NTf}_2$ ] $^+$ : 179.0821, Found: 179.0831.



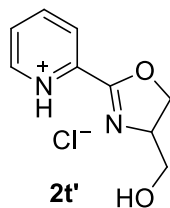

**2-(4-(Hydroxymethyl)-4,5-dihydrooxazol-2-yl)pyridin-1-ium chloride (2t')** was prepared from oxetane **1t** in DCE with 2.5 equivalents of HCl (4 M in MeOH) in place of In(OTf)<sub>3</sub> at 60 °C according to the General Procedure A (reaction time: 72 h, purification by flash column chromatography: 67% EtOAc in hexanes→EtOAc, 43 mg, oil, 48% yield).

<sup>1</sup>H NMR (400 MHz, CDCl<sub>3</sub>) δ 8.57-8.45 (m, 2H), 8.16 (d, *J* = 7.6 Hz 1H), 7.88-7.80 (m, 1H), 7.47-7.40 (m, 1H), 4.48-4.38 (m, 1H), 4.02-3.93 (m, 1H), 3.92-3.76 (m, 3H) ppm.

<sup>13</sup>C NMR (100 MHz, CDCl<sub>3</sub>) δ 164.6, 149.2, 148.2, 137.4, 126.5, 122.4, 61.8, 51.8, 43.9 ppm.

IR (thin film) 3368, 2954, 1662, 1580, 1517, 1464, 1045, 906, 725, 698 cm<sup>-1</sup>.

HRMS (CI<sup>+</sup>) Calcd for C<sub>9</sub>H<sub>12</sub>ClN<sub>2</sub>O<sub>2</sub> [M + H]<sup>+</sup>: 215.0593, Found: 215.0596.

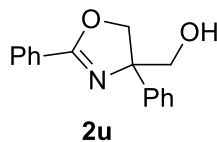

**(2,4-Diphenyl-4,5-dihydrooxazol-4-yl)methanol (2u)** was prepared from oxetane **1u** (reaction time: 22 h) according to the General Procedure A (purification by flash column chromatography: 67% EtOAc in hexanes→EtOAc, 117 mg, white solid, 92% yield).

<sup>1</sup>H NMR (400 MHz, CDCl<sub>3</sub>) δ 8.06-7.97 (m, 2H), 7.52 (t, *J* = 7.2 Hz, 1H), 7.49-7.34 (m, 6H), 7.32-7.26 (m, 1H), 4.87 (d, *J* = 8.0 Hz 1H), 4.54 (d, *J* = 8.0 Hz, 1H), 3.94 (d, *J* = 11.6 Hz, 1H), 3.76 (d, *J* = 11.6 Hz, 1H) ppm.

<sup>13</sup>C NMR (100 MHz, CDCl<sub>3</sub>) δ 165.1, 143.6, 131.7, 128.6, 128.5, 128.3, 127.4, 127.0, 125.7, 80.0, 75.3, 68.8 ppm.

IR (thin film) 3179, 2896, 1645, 1579, 1493, 1083, 978, 764, 693 cm<sup>-1</sup>.

HRMS (CI<sup>+</sup>) Calcd for C<sub>16</sub>H<sub>16</sub>NO<sub>2</sub> [M + H]<sup>+</sup>: 254.1181, Found: 254.1187.

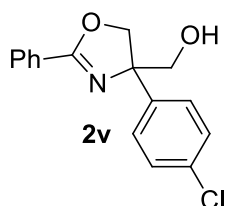

**(4-(4-Chlorophenyl)-2-phenyl-4,5-dihydrooxazol-4-yl)methanol (2v)** was prepared from oxetane **1v** (reaction time: 22 h) according to the General Procedure A (purification by flash column chromatography: 67% EtOAc in hexanes→EtOAc, 138 mg, white solid, 96% yield).

<sup>1</sup>H NMR (400 MHz, CDCl<sub>3</sub>) δ 7.94-7.88 (m, 2H), 7.47 (t, *J* = 7.2 Hz, 1H), 7.42-7.28 (m, 6H), 4.86 (d, *J* = 8.0 Hz 1H), 4.46 (d, *J* = 8.0 Hz, 1H), 3.89 (d, *J* = 11.6 Hz, 1H), 3.70 (d, *J* = 11.6 Hz, 1H) ppm.

<sup>13</sup>C NMR (100 MHz, CDCl<sub>3</sub>) δ 165.2, 142.2, 133.3, 131.7, 128.7, 128.5, 128.3, 127.2, 126.9, 77.7, 75.1, 68.7 ppm.

IR (thin film) 3211, 2896, 1649, 1571, 1493, 1400, 1067, 977, 689 cm<sup>-1</sup>.

HRMS (CI<sup>+</sup>) Calcd for C<sub>16</sub>H<sub>15</sub>ClNO<sub>2</sub> [M + H]<sup>+</sup>: 288.0791, Found: 288.0785.

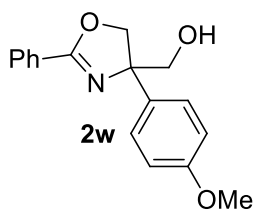

**(4-(4-Methoxyphenyl)-2-phenyl-4,5-dihydrooxazol-4-yl)methanol (2w)** was prepared from oxetane **1w** (reaction time: 22 h) according to the General Procedure A (purification by flash column chromatography: 67% EtOAc in hexanes→EtOAc, 151 mg, white solid, 95% yield).

<sup>1</sup>H NMR (400 MHz, CDCl<sub>3</sub>) δ 7.97-7.90 (m, 2H), 7.48 (t, *J* = 7.2 Hz, 1H), 7.41-7.28 (m, 4H), 6.92-6.86 (m, 2H), 4.86 (d, *J* = 8.0 Hz 1H), 4.50 (d, *J* = 8.0 Hz, 1H), 3.93 (d, *J* = 12.0 Hz, 1H), 3.79 (s, 3H), 3.72 (d, *J* = 12.0 Hz, 1H) ppm.

$^{13}\text{C}$  NMR (100 MHz,  $\text{CDCl}_3$ )  $\delta$  165.0, 158.8, 135.7, 131.6, 128.5, 128.3, 127.0, 126.8, 114.0, 77.5, 75.5, 68.8, 55.3 ppm.

IR (thin film) 3196, 2957, 1642, 1579, 1510, 1450, 1244, 1025, 734, 692  $\text{cm}^{-1}$ .

HRMS (CI+) Calcd for  $\text{C}_{17}\text{H}_{18}\text{NO}_3$   $[\text{M} + \text{H}]^+$ : 284.1287, Found: 284.1284.

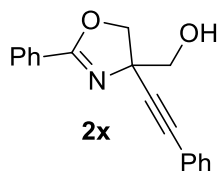

**(2-Phenyl-4-(phenylethynyl)-4,5-dihydrooxazol-4-yl)methanol (2x)** was prepared from oxetane **1x** (reaction time: 22 h) according to the General Procedure A (purification by flash column chromatography: 67% EtOAc in hexanes  $\rightarrow$  EtOAc, 134 mg, white solid, 97% yield).

$^1\text{H}$  NMR (400 MHz,  $\text{CDCl}_3$ )  $\delta$  8.03-7.95 (m, 2H), 7.52-7.36 (m, 5H), 7.34-7.26 (m, 3H), 4.69 (d,  $J = 8.0$  Hz 1H), 4.62 (d,  $J = 8.0$  Hz, 1H), 4.03 (d,  $J = 11.6$  Hz, 1H), 3.79 (d,  $J = 11.6$  Hz, 1H) ppm.

$^{13}\text{C}$  NMR (100 MHz,  $\text{CDCl}_3$ )  $\delta$  166.3, 131.9, 131.8, 128.6, 128.5, 128.3, 128.2, 126.7, 122.2, 88.1, 85.7, 74.8, 70.2, 67.2 ppm.

IR (thin film) 3237, 2902, 1642, 1578, 1490, 1449, 1062, 755, 687  $\text{cm}^{-1}$ .

HRMS (CI+) Calcd for  $\text{C}_{18}\text{H}_{16}\text{NO}_2$   $[\text{M} + \text{H}]^+$ : 278.1181, Found: 278.1178.

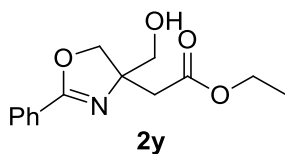

**Ethyl 2-(4-(hydroxymethyl)-2-phenyl-4,5-dihydrooxazol-4-yl)acetate (2y)** was prepared from oxetane **1y** (reaction time: 22 h) according to the General Procedure A (purification by flash column chromatography: 67% EtOAc in hexanes  $\rightarrow$  EtOAc, 103 mg, yellow oil, 79% yield).

$^1\text{H}$  NMR (400 MHz,  $\text{CDCl}_3$ )  $\delta$  7.85-7.80 (m, 2H), 7.44 (t,  $J = 7.2$  Hz, 1H), 7.37-7.30 (m, 2H), 4.48 (dd,  $J_1 = 13.6$  Hz,  $J_2 = 8.8$  Hz 2H), 4.10 (q,  $J = 7.2$  Hz, 2H), 3.82 (d,  $J = 11.6$  Hz,

1H), 3.65 (d,  $J = 11.6$  Hz, 1H), 2.81 (d,  $J = 15.6$  Hz, 1H), 2.66 (d,  $J = 15.6$  Hz, 1H), 1.20 (t,  $J = 7.2$  Hz, 3H) ppm.

$^{13}\text{C}$  NMR (100 MHz,  $\text{CDCl}_3$ )  $\delta$  170.6, 165.1, 131.6, 128.4, 128.2, 127.0, 73.20, 73.1, 67.0, 60.7, 40.9, 14.1 ppm.

IR (thin film) 3300, 2982, 1727, 1643, 1580, 1497, 1466, 1450, 1026, 974, 732, 697  $\text{cm}^{-1}$ .

HRMS (CI+) Calcd for  $\text{C}_{14}\text{H}_{18}\text{NO}_4$  [ $\text{M} + \text{H}$ ] $^+$ : 264.1236, Found: 264.1225.

### General Procedure B.

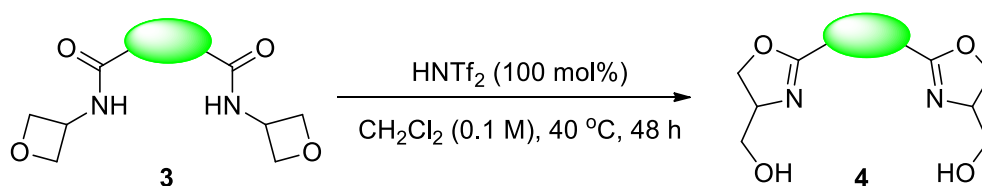

To a solution of oxetane **3** (0.50 mmol) in dichloromethane (5.0 mL) was added triflimide (141 mg, 100 mol%). After stirring at 40 °C for 48 h, the reaction was quenched with an aqueous solution of NaOH (3 mL, 10%) followed by stirring for 10 min. The mixture was then diluted with water (5 mL) and extracted with dichloromethane (2×15 mL). The combined extracts were washed with water and brine, dried over anhydrous  $\text{Na}_2\text{SO}_4$ , and concentrated under reduced pressure. The residue was purified by silica gel column chromatography to afford the desired oxazoline **4**.

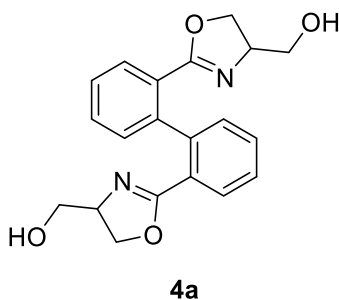

**[1,1'-Biphenyl]-2,2'-diylbis(4,5-dihydrooxazole-2,4-diy)dimethanol (4a)** was prepared from oxetane **3a** (reaction time: 72 h) according to the General Procedure A (purification by flash column chromatography: DCM/MeOH = 30:1, 89 mg, white solid, 50% yield, > 20:1 *dr*).

<sup>1</sup>H NMR (400 MHz, CDCl<sub>3</sub>) δ 7.58-7.48 (m, 4H), 7.46-7.36 (m, 4H), 4.23-4.01 (m, 6H), 3.90 (t, *J* = 8.0 Hz, 2H), 3.60 (dd, *J*<sub>1</sub> = 12.8 Hz, *J*<sub>2</sub> = 2.8 Hz, 2H) ppm.

<sup>13</sup>C NMR (100 MHz, CDCl<sub>3</sub>) δ 168.3, 140.1, 130.3, 129.3 (2C), 128.5, 127.8, 68.7, 67.8, 61.4 ppm.

IR (thin film) 3216, 2902, 1653, 1598, 1497, 1468, 1444, 1356, 1110, 1038, 953, 771, 732, 698 cm<sup>-1</sup>.

HRMS (CI<sup>+</sup>) Calcd for C<sub>20</sub>H<sub>21</sub>N<sub>2</sub>O<sub>4</sub> [M + H]<sup>+</sup>: 353.1501, Found: 353.1495.

**Notes to determination of the relative stereochemistry:**

The following two possible isomers regarding relative stereochemistry are possible. (±)-**4a** and *meso*-**4a** both have symmetry and thus degeneracy are expected for both structures. Therefore, both structures are possible for this product.

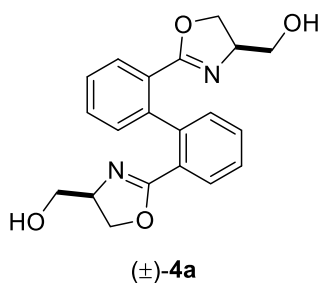

C<sub>2</sub> symmetry

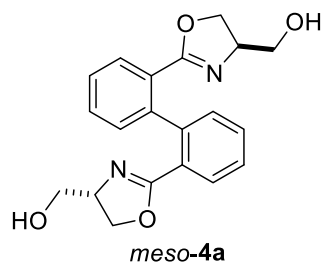

plane symmetry

Degeneracy expected for NMR spectra for both structures

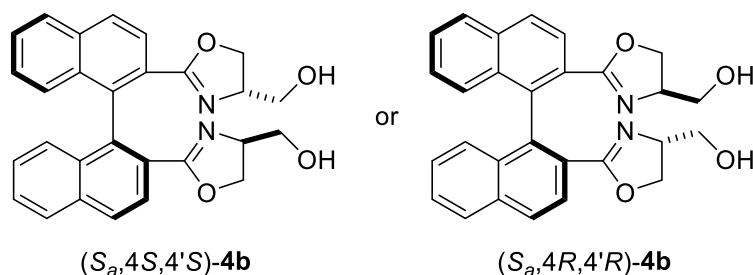

**((4S,4'S)/(4R,4'R)-((S)-[1,1'-Binaphthalene]-2,2'-diyl)bis(4,5-dihydrooxazole-2,4-diyl)dimethanol (4b)** was prepared from oxetane **3b** according to the general procedure B (purification by flash column chromatography: DCM/MeOH = 100:1 → 50:1, 99.6 mg, white solid, 44% yield, single isomer).<sup>[2]</sup>

$[\alpha]_{\text{D}}^{25} = +63.0$  (c 1.0, CHCl<sub>3</sub>).

<sup>1</sup>H NMR (400 MHz, acetone-*d*<sub>6</sub>) δ 8.08 (t, *J* = 8.8 Hz 4H), 7.69 (d, *J* = 8.4 Hz 2H), 7.63-7.56 (m, 2H), 7.41-7.35 (m, 2H), 7.24 (d, *J* = 8.4 Hz 2H), 4.17-4.10 (m, 2H), 3.95 (dd, *J*<sub>1</sub> = 10.0 Hz, *J*<sub>2</sub> = 8.0 Hz 2H), 3.85 (dd, *J*<sub>1</sub> = 12.4 Hz, *J*<sub>2</sub> = 2.0 Hz 2H), 3.54 (t, *J* = 8.0 Hz 2H), 3.21 (dd, *J*<sub>1</sub> = 12.4 Hz, *J*<sub>2</sub> = 3.2 Hz 2H) ppm.

<sup>13</sup>C NMR (100 MHz, acetone-*d*<sub>6</sub>) δ 168.3, 136.4, 134.3, 133.1, 128.8, 128.5, 127.8, 127.6, 127.5, 127.2, 126.5, 69.0, 68.4, 61.5 ppm.

IR (thin film) 3181, 2929, 2863, 1653, 1328, 1193, 1134, 1055, 975 cm<sup>-1</sup>.

HRMS (CI<sup>+</sup>) Calcd for C<sub>28</sub>H<sub>25</sub>N<sub>2</sub>O<sub>4</sub> [M + H]<sup>+</sup>: 453.1814, Found: 453.1809.

**Notes to determination of the relative stereochemistry:**

There are four possible diastereomers for **4b**: (*S*<sub>a</sub>, 4*S*, 4'*S*), (*S*<sub>a</sub>, 4*R*, 4'*R*), (*S*<sub>a</sub>, 4*S*, 4'*R*) and (*S*<sub>a</sub>, 4*S*, 4'*R*). The former two structures have C<sub>2</sub>-symmetry and thus degeneracy should be expected from the NMR spectra, particularly <sup>13</sup>C NMR spectra. For the latter two, there is no symmetry and their NMR spectra should have more peaks.

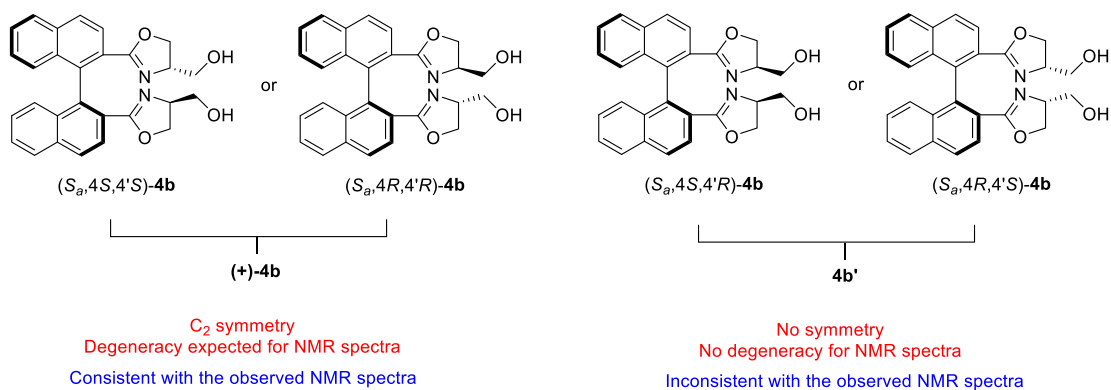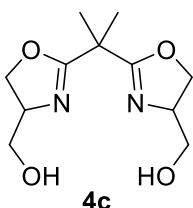

**(2,2'-(Propane-2,2-diyl)bis(4,5-dihydrooxazole-4,2-diyl))dimethanol (4c)** was prepared from oxetane **3c** according to the general procedure B (purification by flash column chromatography: DCM/MeOH = 20:1 → 12:1, 115 mg, white solid, 95% yield, 1:1 *dr*). The two diastereomers can be separated on silica gel.

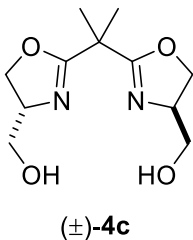

<sup>1</sup>H NMR (400 MHz, acetone-*d*<sub>6</sub>) δ 4.36-4.28 (m, 2H), 4.18-4.16 (m, 4H), 3.67-3.60 (m, 2H), 3.53 (dd, *J*<sub>1</sub> = 10.8 Hz, *J*<sub>2</sub> = 4.4 Hz, 2H), 1.46 (s, 6H) ppm.

<sup>13</sup>C NMR (100 MHz, acetone-*d*<sub>6</sub>) δ 170.9, 70.4, 68.1, 64.3, 39.4, 24.0 ppm.

IR (thin film) 3282, 2986, 2938, 1651, 1470, 1352, 1265, 1192, 1120, 1059, 976 cm<sup>-1</sup>.

HRMS (CI<sup>+</sup>) Calcd for C<sub>11</sub>H<sub>19</sub>N<sub>2</sub>O<sub>4</sub> [M + H]<sup>+</sup>: 243.1345, Found: 243.1350.

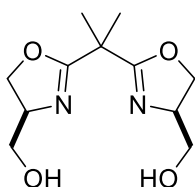

*meso*-**4c**

$^1\text{H NMR}$  (400 MHz, acetone- $d_6$ )  $\delta$  4.34-4.26 (m, 2H), 4.24-4.14 (m, 4H), 3.58 (dd,  $J_1 = 10.8$  Hz,  $J_2 = 4.0$  Hz, 2H), 3.52 (dd,  $J_1 = 11.2$  Hz,  $J_2 = 4.0$  Hz, 2H), 1.48 (s, 3H), 1.42 (s, 3H) ppm.

$^{13}\text{C NMR}$  (100 MHz, acetone- $d_6$ )  $\delta$  170.7, 70.4, 67.9, 64.3, 39.2, 24.6, 23.0 ppm.

IR (thin film) 3279, 2989, 2941, 1651, 1470, 1348, 1266, 1190, 1130, 1056, 977  $\text{cm}^{-1}$ .

HRMS (CI+) Calcd for  $\text{C}_{11}\text{H}_{19}\text{N}_2\text{O}_4$   $[\text{M} + \text{H}]^+$ : 243.1345, Found: 243.1350.

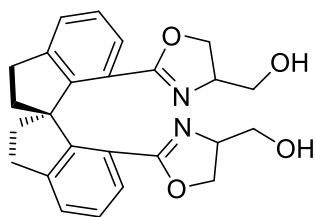

**4d**

(2,2'-((*R*)-2,2',3,3'-Tetrahydro-1,1'-spirobi[indene]-7,7'-diyl)bis(4,5-dihydrooxazole-4,2-diyl))dimethanol (**4d**) was prepared from oxetane **3d** in DCM with one equivalent of HNTf<sub>2</sub> at 40 °C according to the general procedure B (reaction time: 48 h, purification by flash column chromatography: DCM/MeOH = 30:1 → 20:1, 183 mg, white solid, 89% yield, 1:1 *dr*). The two diastereomers can be separated on silica gel.

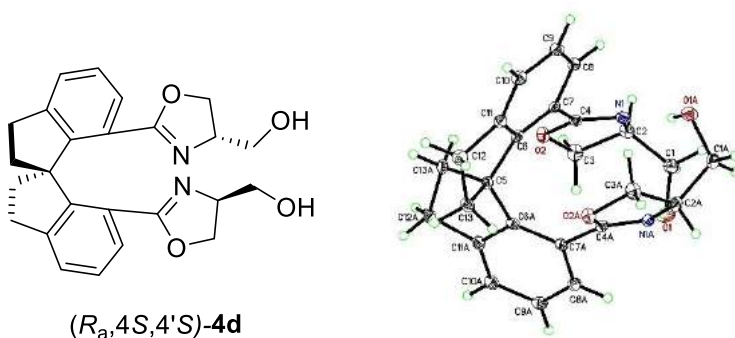

(*R*<sub>a</sub>,4*S*,4'*S*)-**4d**



**(*R<sub>a</sub>,4S,4'S*)-((2,2',3,3'-Tetrahydro-1,1'-spirobi[indene]-7,7'-diyl)bis(4,5-dihydrooxazole-2,4-diyl))dimethanol.**

$[\alpha]_{\text{D}}^{25} = +215.0$  (*c* 1.0, CHCl<sub>3</sub>).

<sup>1</sup>H NMR (400 MHz, CDCl<sub>3</sub>)  $\delta$  7.55 (d, *J* = 7.6 Hz, 2H), 7.41 (d, *J* = 7.6 Hz, 2H), 7.25 (t, *J* = 7.6 Hz, 2H), 5.83 (br s, 2H), 4.09 (d, *J* = 13.6 Hz, 2H), 4.06-3.96 (m, 4H), 3.31 (dd, *J*<sub>1</sub> = 12.4 Hz, *J*<sub>2</sub> = 2.8 Hz, 2H), 3.13-2.92 (m, 6H), 2.47-2.36 (m, 2H), 2.27 (dd, *J*<sub>1</sub> = 11.6 Hz, *J*<sub>2</sub> = 6.8 Hz, 2H) ppm.

<sup>13</sup>C NMR (100 MHz, CDCl<sub>3</sub>)  $\delta$  168.7, 148.1, 144.7, 130.5, 127.7, 126.3, 122.2, 68.4, 67.1, 62.6, 60.9, 38.5, 30.4 ppm.

IR (thin film) 3221, 2931, 2851, 1641, 1447, 1353, 1271, 1113, 1062, 952 cm<sup>-1</sup>.

HRMS (CI<sup>+</sup>) Calcd for C<sub>25</sub>H<sub>27</sub>N<sub>2</sub>O<sub>4</sub> [M + H]<sup>+</sup>: 419.1971, Found: 419.1955.

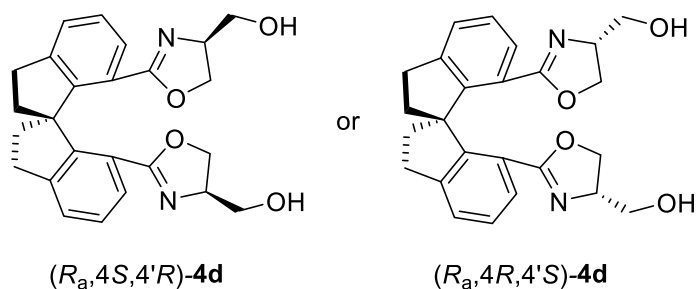

**(*R<sub>a</sub>,4S,4'R*)/(*R<sub>a</sub>,4R,4'S*)-((2,2',3,3'-tetrahydro-1,1'-spirobi[indene]-7,7'-diyl)bis(4,5-dihydrooxazole-2,4-diyl))dimethanol.<sup>[2]</sup>**

$[\alpha]_{\text{D}}^{25} = +177.6$  (*c* 1.0, CHCl<sub>3</sub>).

<sup>1</sup>H NMR (400 MHz, CDCl<sub>3</sub>)  $\delta$  7.64 (d, *J* = 7.6 Hz, 1H), 7.51 (d, *J* = 7.6 Hz, 1H), 7.38 (t like, *J* = 6.8 Hz, 2H), 7.64 (td, *J*<sub>1</sub> = 7.6 Hz, *J*<sub>2</sub> = 2.0 Hz, 2H), 4.06-3.99 (m, 1H), 3.97-3.85 (m, 4H), 3.40-3.30 (m, 2H), 3.27 (dd, *J*<sub>1</sub> = 12.0 Hz, *J*<sub>2</sub> = 4.0 Hz, 1H), 3.15-2.87 (m, 6H), 2.54-2.41 (m, 2H), 2.32-2.20 (m, 2H) ppm.

<sup>13</sup>C NMR (100 MHz, CDCl<sub>3</sub>)  $\delta$  167.0, 166.0, 148.5, 148.3, 145.3, 144.6, 128.9, 128.7, 127.3, 127.2, 126.2, 126.1, 123.4, 122.7, 68.8, 68.3, 67.3, 66.9, 63.7, 62.9, 62.3, 38.3, 38.2, 30.5, 30.4 ppm.

IR (thin film) 3256, 2939, 1643, 1363, 1267, 1113, 1055, 978 cm<sup>-1</sup>.

HRMS (CI<sup>+</sup>) Calcd for C<sub>25</sub>H<sub>27</sub>N<sub>2</sub>O<sub>4</sub> [M + H]<sup>+</sup>: 419.1971, Found: 419.1973.

**Notes to determination of the relative stereochemistry:**

X-Ray crystallography confirmed the relative stereochemistry of one diastereomer. For the other diastereomer, similar to the case of **4b**, the absence of degeneracy in  $^{13}\text{C}$  NMR indicated that both ( $R_a,4S,4'R$ ) and ( $R_a,4R,4'S$ ) are possible.

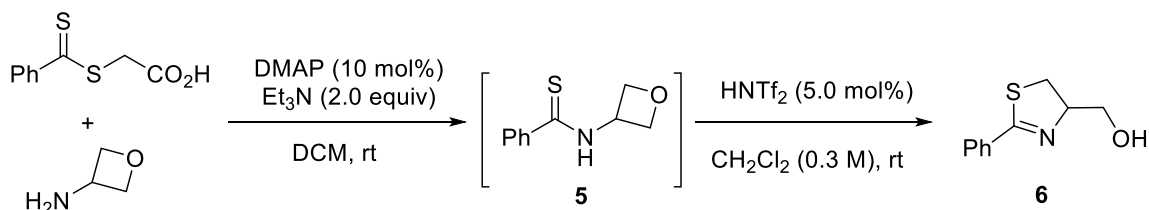

**(2-Phenyl-4,5-dihydrothiazol-4-yl)methanol (6)**. At 0 °C, to a solution of oxetan-3-amine (0.23 mL, 3.3 mmol), DMAP (36.4 mg, 0.3 mmol), and Et<sub>3</sub>N (0.83 mL, 6.0 mmol) in CH<sub>2</sub>Cl<sub>2</sub> (10 mL) was added 2-((phenylcarbonothioyl)thio)acetic acid (636 mg, 3.0 mmol). After stirring at room temperature for 12 h, the resulting solution was washed with a saturated aqueous solution of NH<sub>4</sub>Cl (20 mL). The layers were separated. Then the organic layer was treated with triflimide (42 mg, 5.0 mol%). After stirring for another 12 h, the reaction was quenched with an aqueous solution of NaHCO<sub>3</sub> (20 mL, 10%). The mixture was stirred for 10 min and then diluted with water (30 mL). The layers were separated, and the organic layer was extracted with dichloromethane (2×30 mL). The combined organic layers were washed with water and brine, dried over anhydrous Na<sub>2</sub>SO<sub>4</sub>, and concentrated under reduced pressure. The residue was purified by simple recrystallization (hexanes and diethyl ether) to afford the pure amide **1a** (422 mg, 73% yield, yellow solid).

$^1\text{H}$  NMR (400 MHz, CDCl<sub>3</sub>)  $\delta$  7.80 (d,  $J$  = 7.2 Hz, 2H), 7.50-7.44 (m, 1H), 7.39 (t,  $J$  = 8.0 Hz, 2H), 4.84-4.73 (m, 1H), 4.03 (dd,  $J_1$  = 11.2 Hz,  $J_2$  = 4.8 Hz, 1H), 3.79 (dd,  $J_1$  = 11.2 Hz,  $J_2$  = 45.6 Hz, 1H), 3.43 (dd,  $J_1$  = 10.8 Hz,  $J_2$  = 0.8 Hz, 1H), 3.32 (dd,  $J_1$  = 10.8 Hz,  $J_2$  = 1.2 Hz, 1H), 3.09 (br s, 1H) ppm.

**<sup>13</sup>C NMR** (100 MHz, CDCl<sub>3</sub>) δ 170.3, 132.6, 131.6, 128.5, 128.4, 79.0, 64.3, 34.3 ppm.

**IR** (thin film) 3351, 2935, 2869, 1600, 1488, 1444, 1317, 1260, 1054, 947 cm<sup>-1</sup>.

**HRMS** (CI+) Calcd for C<sub>10</sub>H<sub>12</sub>NOS [M + H]<sup>+</sup>: 194.0634, Found: 194.0644.

#### IV. Product Derivatizations and Utility

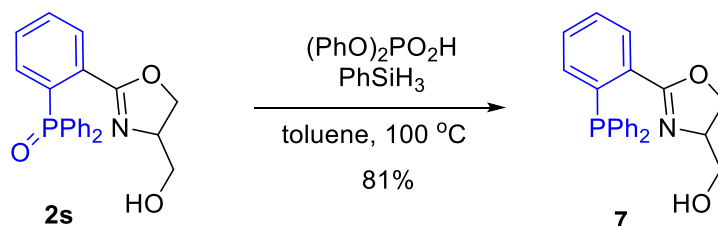

**(2-(2-(Diphenylphosphino)phenyl)-4,5-dihydrooxazol-4-yl)methanol (7).** Under Ar, to an oven-dried 5-mL charged with  $(\text{PhO})_2\text{PO}_2\text{H}$  (5.1 mg, 0.02 mmol) and **2s** (75.5 mg, 0.2 mmol) were added dry toluene (1 mL) and  $\text{PhSiH}_3$  (75  $\mu\text{L}$ , 0.6 mmol). The mixture was stirred at  $100\text{ }^\circ\text{C}$  for overnight before it was cooled to  $0\text{ }^\circ\text{C}$ . Methanolic KOH (2 mL, 3N) was added slowly, and then the mixture was stirred vigorously for 3 h at room temperature. Next, water (3 mL) was added and the mixture was extracted by ethyl acetate. The organic layer was washed by an aqueous solution of HCl (1 M, 5 mL) followed by a saturated aqueous  $\text{NaHCO}_3$  solution (5 mL). The organic layer was then dried over  $\text{Na}_2\text{SO}_4$  and concentrated. The residue was purified by silica gel column chromatography (hexanes/EtOAc = 2:1) to give phosphine **7** as a white solid (61.0 mg, 81% yield).

$^1\text{H NMR}$  (400 MHz,  $\text{CDCl}_3$ )  $\delta$  7.93-7.87 (m, 1H), 7.42-7.24 (m, 12H), 6.97-6.92 (m, 1H), 4.38-4.28 (m, 2H), 4.17 (t,  $J = 6.4\text{ Hz}$ , 1H), 3.67 (dd,  $J_1 = 11.6\text{ Hz}$ ,  $J_2 = 2.8\text{ Hz}$ , 1H), 3.30 (dd,  $J_1 = 11.6\text{ Hz}$ ,  $J_2 = 3.6\text{ Hz}$ , 1H), 1.82 (br s, 1H) ppm.

$^{13}\text{C NMR}$  (100 MHz,  $\text{CDCl}_3$ )  $\delta$  164.4 (d,  $J = 2.0\text{ Hz}$ ), 138.8 (d,  $J = 22.0\text{ Hz}$ ), 138.3 (d,  $J = 7.0\text{ Hz}$ ), 137.4 (d,  $J = 9.0\text{ Hz}$ ), 134.3 (d,  $J = 21.0\text{ Hz}$ ), 133.3 (d,  $J = 20.0\text{ Hz}$ ), 131.4 (d,  $J = 20.0\text{ Hz}$ ), 130.7, 129.6 (d,  $J = 3.0\text{ Hz}$ ), 128.7 (d,  $J = 12.6\text{ Hz}$ ), 128.5 (d,  $J = 7.4\text{ Hz}$ ), 128.3, 68.8, 68.4, 64.0 ppm.

$^{31}\text{P NMR}$  (162 MHz,  $\text{CDCl}_3$ )  $\delta$  -6.59 ppm.

IR (thin film) 3350, 3056, 2928, 1648, 1472, 1433, 1354, 1263, 1099, 1040  $\text{cm}^{-1}$ .

HRMS (CI+) Calcd for  $\text{C}_{22}\text{H}_{21}\text{NO}_2\text{P}$   $[\text{M} + \text{H}]^+$ : 362.1310, Found: 362.1310.

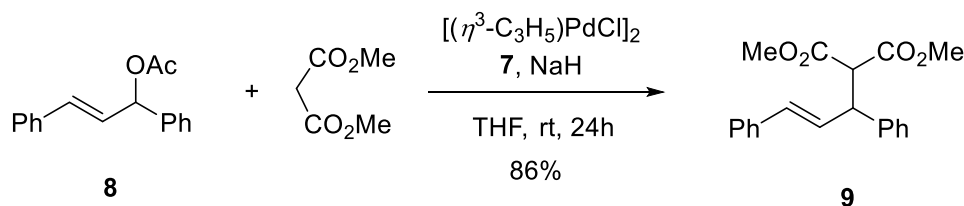

**(E)-Dimethyl 2-(1,3-diphenylallyl)malonate (9).** This procedure was based on literature.<sup>[2]</sup> Ligand **7** (3.7 mg, 0.01 mmol),  $[(\eta^3\text{-C}_3\text{H}_5)\text{-PdCl}]_2$  (1.9 mg, 0.005 mmol), and (*E*)-1,3-diphenylallyl acetate **8** (51.0 mg, 0.20 mmol) were dissolved in THF (1 mL), and stirred for 1 h at room temperature. In a separate flask, dimethyl malonate (55  $\mu\text{L}$ , 0.48 mmol) was added dropwise to a suspension of NaH (19.0 mg, 0.48 mmol, 60% in mineral oil) in THF (2 mL). This suspension was cooled to 0  $^\circ\text{C}$ , and the above-prepared solution of electrophile was added slowly. The mixture was stirred at room temperature for 24 h and filtered through a pad of silica, which was washed with EtOAc. The filtrate was concentrated and then purified by flash chromatography on silica gel (hexanes/EtOAc = 20:1 to 15:1) to give product **9** as a colorless oil (55.9 mg, 86% yield).

$^1\text{H NMR}$  (400 MHz,  $\text{CDCl}_3$ )  $\delta$  7.35-7.18 (m, 10H), 7.49 (d,  $J = 15.6$  Hz, 1H), 6.34 (dd,  $J_1 = 16.0$  Hz,  $J_2 = 8.8$  Hz, 1H), 4.28 (dd,  $J_1 = 10.8$  Hz,  $J_2 = 8.4$  Hz, 1H), 3.97 (d,  $J = 10.8$  Hz, 1H), 3.71 (s, 3H), 3.53 (s, 3H) ppm.

$^{13}\text{C NMR}$  (100 MHz,  $\text{CDCl}_3$ )  $\delta$  168.2, 167.7, 140.1, 136.8, 131.8, 129.1, 128.7, 128.4, 127.8, 127.5, 127.1, 126.4, 57.6, 52.6, 52.4, 29.2 ppm.

This product is a known compound. The characterization data match the literature.<sup>[2]</sup>

---

[2]. H. Aït-Haddou, O. Hoarau, D. Cramailÿe, F. Pezet, J. C. Daran and G. G. A. Balavoine, *Chem. Eur. J.* **2004**, *10*, 699–707.

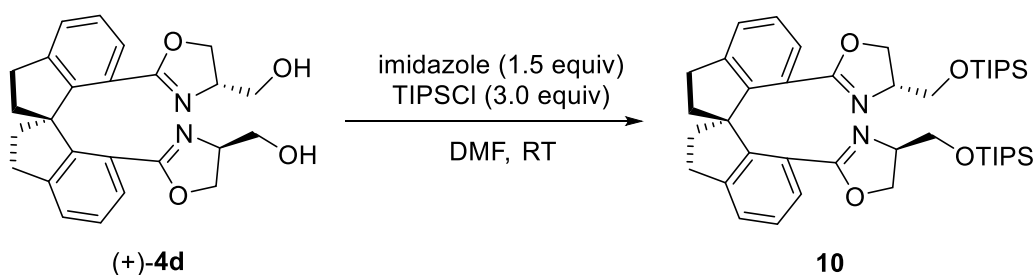

**(R)-7,7'-Bis((S)-4-(((triisopropylsilyl)oxy)methyl)-4,5-dihydro**

**oxazol-2-yl)-2,2',3,3'-tetrahydro-1,1'-spirobi[indene] (10).** To a solution of **4d** (70.5 mg, 0.17 mmol, 1.0 equiv) in DMF (2.0 mL) were sequentially added imidazole (47.3 mg, 0.68 mmol, 4.0 equiv) and TIPSCl (150  $\mu$ L, 0.68 mmol, 4.0 equiv). The reaction mixture was stirred at room temperature overnight. Then, water (5 mL) and Et<sub>2</sub>O (10 mL) were added. The layers were separated and the aqueous layer was extracted with Et<sub>2</sub>O (2  $\times$  10 mL). The combined organic layers were washed with brine, dried over Na<sub>2</sub>SO<sub>4</sub>, and concentrated under reduced pressure. The residue was purified by flash column chromatography (5% ether in hexanes) to give the desired **10** (87.0 mg, 70% yield).

$[\alpha]_{\text{D}}^{25} = +77.3$  (*c* 1.0, CHCl<sub>3</sub>).

<sup>1</sup>H NMR (400MHz, CDCl<sub>3</sub>)  $\delta$  7.51 (d, *J* = 6.8 Hz, 2H), 7.32 (d, *J* = 7.6 Hz, 2H), 7.16-7.10 (m, 2H), 4.02-3.92 (m, 2H), 3.81 (dd, *J*<sub>1</sub> = 9.6 Hz, *J*<sub>2</sub> = 4.0 Hz, 2H), 3.77-3.66 (m, 2H), 3.36-3.20 (m, 4H), 3.12-2.92 (m, 4H), 2.65 (dd, *J*<sub>1</sub> = 20.4 Hz, *J*<sub>2</sub> = 10.8 Hz, 2H), 2.24 (dd, *J*<sub>1</sub> = 11.6 Hz, *J*<sub>2</sub> = 7.2 Hz, 2H), 1.07-0.95 (m, 42H).

<sup>13</sup>C NMR (101MHz, CDCl<sub>3</sub>)  $\delta$  164.4, 149.0, 145.3, 127.9, 126.5, 126.4, 125.8, 70.9, 68.3, 66.0, 63.0, 38.6, 30.7, 17.9, 11.9 ppm.

IR (thin film) 2937, 2863, 1649, 1461, 1355, 1284, 1250, 1102, 985 cm<sup>-1</sup>.

HRMS (CI+) Calcd for C<sub>43</sub>H<sub>66</sub>N<sub>2</sub>O<sub>4</sub>Si<sub>2</sub> [M]<sup>+</sup>: 730.4561, Found: 730.4573.

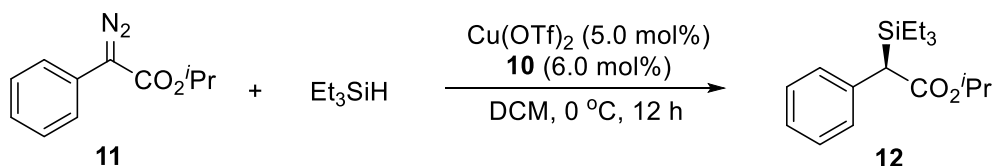

**Isopropyl (*R*)-2-phenyl-2-(triethylsilyl)acetate (12).** This procedure was based on literature.<sup>[3]</sup> Under N<sub>2</sub>, Cu(OTf)<sub>2</sub> (1.8 mg, 5.0 μmol) and **10** (4.4 mg, 6.0 μmol) were dissolved in CH<sub>2</sub>Cl<sub>2</sub> (1.5 mL) in a 2-dram vial. The mixture was stirred at 0 °C for 10 min. Next, a solution of 2-diazo-2-phenyl acetates **11** (20.5 mg, 0.1 mmol) and triethylsilane (64 μL, 0.4 mmol) in CH<sub>2</sub>Cl<sub>2</sub> (0.5 mL) was injected into the reaction mixture. The reaction mixture was stirred at 40 °C for 12 h and then cooled to room temperature and concentrated under reduced pressure. The residue was purified by flash chromatography on silica gel (hexanes/ether = 50:1) to afford the pure product **12** (24.2 mg, 83% yield, 84:16 er, colorless oil).

$[\alpha]_{\text{D}}^{25} = +8.8$  (*c* 1.0, CHCl<sub>3</sub>).

HPLC analysis of the product: Daicel CHIRALPAK OD-H column; 0.05% *i*-PrOH in hexanes; 1.0 mL/min; retention times: 7.0 min (major), 20.0 min (minor).

<sup>1</sup>H NMR (400 MHz, CDCl<sub>3</sub>) δ 7.38-7.33 (m, 2H), 7.30-7.24 (m, 2H), 7.16 (t like, *J* = 7.2 Hz, 1H), 5.07-4.96 (m, 1H), 3.48 (s, 1H), 1.27 (d, *J* = 6.0 Hz, 3H), 1.23 (d, *J* = 6.4 Hz, 3H), 0.91 (t, *J* = 8.0 Hz, 9H), 0.67-0.52 (m, 6H).

<sup>13</sup>C NMR (100 MHz, CDCl<sub>3</sub>) δ 172.7, 136.8, 128.5, 128.0, 125.4, 67.6, 43.0, 22.1, 21.9, 7.1, 2.7 ppm.

IR (thin film) 2955, 2807, 1711, 1265, 1152, 1105 cm<sup>-1</sup>.

HRMS (CI<sup>+</sup>) Calcd for C<sub>17</sub>H<sub>28</sub>O<sub>2</sub>Si [M]<sup>+</sup>: 292.1859, Found: 292.1859.

[3]. Y.-Z. Zhang, S.-F. Zhu, L.-X. Wang and Q.-L. Zhou, *Angew. Chem. Int. Ed.* **2008**, *47*, 8496–8498.

## V. Synthesis of Diverse Natural Products.

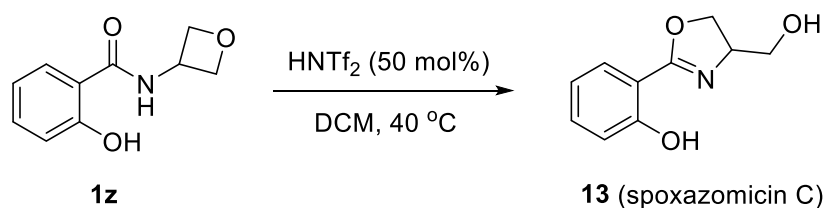

**Spoxazomicin C (13).** To a solution of oxetane **1z** (1.93 g, 10.0 mmol) in dichloromethane (50 mL) was added triflimide (1.47 g, 50 mol%). After stirring at 40 °C for 48 h, the reaction was quenched with an aqueous solution of NaHCO<sub>3</sub> (30 mL, 10%) followed by stirring for 10 min. The mixture was then diluted with water (50 mL). The layers were separated and the organic layer was extracted with dichloromethane (2×50 mL). The combined organic layers were washed with water and brine, dried over anhydrous Na<sub>2</sub>SO<sub>4</sub>, and concentrated under reduced pressure. The residue was purified by simple recrystallization (hexanes and diethyl ether) to afford the pure amide **1a** (1.63 g, 85% yield, white solid).

<sup>1</sup>H NMR (400 MHz, CDCl<sub>3</sub>) δ 7.65 (dd, *J*<sub>1</sub> = 8.0 Hz, *J*<sub>2</sub> = 4.0 Hz, 1H), 7.40-7.34 (m, 1H), 7.00 (dd, *J*<sub>1</sub> = 12.0 Hz, *J*<sub>2</sub> = 4.0 Hz, 1H), 6.87 (t, *J* = 8.0 Hz, 1H), 4.52-4.43 (m, 2H), 4.38-4.29 (m, 1H), 3.91-3.82 (m, 1H), 3.73-3.64 (m, 1H) ppm.

<sup>13</sup>C NMR (100 MHz, CDCl<sub>3</sub>) δ 166.8, 159.7, 133.6, 128.2, 118.8, 116.7, 110.4, 68.5, 66.8, 63.9 ppm.

IR (thin film) 3409, 2935, 1638, 1490, 1367, 1259, 1063, 958 cm<sup>-1</sup>.

HRMS (CI<sup>+</sup>) Calcd for C<sub>10</sub>H<sub>11</sub>NO<sub>3</sub> [M]<sup>+</sup>: 193.0739, Found: 193.0748.

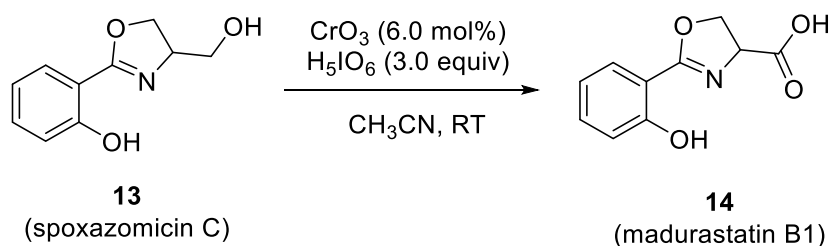



**Madurastatin B1 (14).** At room temperature, to a solution of alcohol **13** (96.3 mg, 0.5 mmol) in CH<sub>3</sub>CN (2 mL) was added a solution of H<sub>5</sub>IO<sub>6</sub> (351.6 mg, 1.5 mmol) and CrO<sub>3</sub> (3.3 mg, 0.03 mmol) in CH<sub>3</sub>CN (4.0 mL) over a period of 15 min, and the mixture was allowed to stir for 30 min. It was diluted with water (2 mL) and extracted with ethyl acetate (3 × 5 mL). The combined organic layers were washed with brine, dried over MgSO<sub>4</sub>, and concentrated to give pure product **14** (72.6 mg, 75% yield, yellow solid).

This product is a known compound. The characterization data match the literature.<sup>[4]</sup>

<sup>1</sup>H NMR (400 MHz, MeOD-*d*<sub>4</sub>) δ 7.67 (d, *J* = 7.6 Hz, 1H), 7.40 (t, *J* = 7.6 Hz, 1H), 6.95 (d, *J* = 8.0 Hz, 1H), 6.88 (d, *J* = 7.6 Hz, 1H), 5.02-4.85 (1H, covered with H<sub>2</sub>O peak), 4.64 (d, *J* = 4.4 Hz, 2H) ppm.

<sup>13</sup>C NMR (100 MHz, MeOD-*d*<sub>4</sub>) δ 173.8, 168.8, 161.1, 135.2, 129.5, 120.0, 117.7, 111.2, 70.7, 68.1 ppm.

IR (thin film) 2955, 1729, 1632, 1487, 1446, 1369, 1258, 1084 cm<sup>-1</sup>.

HRMS (CI<sup>+</sup>) Calcd for C<sub>10</sub>H<sub>9</sub>NO<sub>4</sub> [M]<sup>+</sup>: 207.0532, Found: 207.0533.

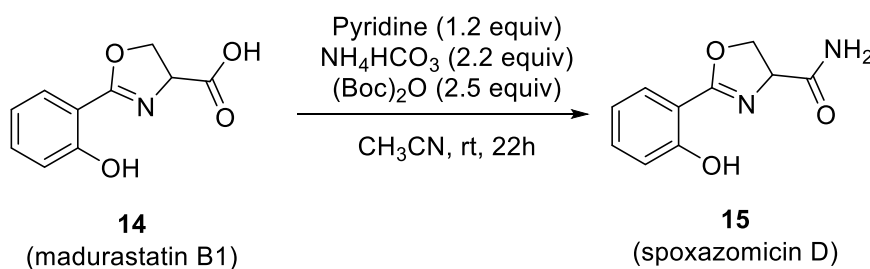

**Sproxazomicin D (15).** At room temperature, to a solution of acid **14** (31.7 mg, 0.15 mmol), NH<sub>4</sub>HCO<sub>3</sub> (26.3 mg, 0.33 mmol) and (Boc)<sub>2</sub>O (81.8 mg, 0.375 mmol) in

---

[4] K. A. Shaaban, M. A. Saunders, Y. Zhang, T. Tran, S. I. Elshahawi, L. V. Ponomareva, X. Wang, J. Zhang, G. C. Copley, M. Sunkara, M. K. Kharel, A. J. Morris, J. C. Hower, M. S. Tremblay, M. A. Prendergast and J. S. Thorson, *J. Nat. Prod.* **2017**, *80*, 2–11.

CH<sub>3</sub>CN (1 mL) was added pyridine (14.5  $\mu$ L, 0.18 mmol). The mixture was allowed to stir at room temperature for 22 h before it was diluted with water (2 mL). The mixture was extracted with ethyl acetate (3  $\times$  5 mL). The combined organic layers were washed with brine, dried over MgSO<sub>4</sub>, and concentrated. The residue was purified by flash column chromatography (hexanes and ethyl acetate) to afford the amide **15** (25.6 mg, 83% yield, white solid).

This product is a known compound. The characterization data match the literature.<sup>[5]</sup>

<sup>1</sup>H NMR (400 MHz, CDCl<sub>3</sub>)  $\delta$  11.46 (br s, 1H), 7.68 (dd,  $J_1 = 8.0$  Hz,  $J_2 = 1.6$  Hz, 1H), 7.43 (td,  $J_1 = 8.4$  Hz,  $J_2 = 1.6$  Hz, 1H), 7.02 (d,  $J_1 = 8.4$  Hz, 1H), 6.91 (t,  $J = 7.6$  Hz, 1H), 6.48 (br s, 1H), 6.03 (br s, 1H), 4.94 (dd,  $J_1 = 10.4$  Hz,  $J_2 = 8.4$  Hz, 1H), 4.68 (dd,  $J_1 = 10.0$  Hz,  $J_2 = 8.8$  Hz, 2H), ppm.

<sup>13</sup>C NMR (100 MHz, CDCl<sub>3</sub>)  $\delta$  173.2, 168.0, 159.7, 134.4, 128.6, 119.2, 116.9, 109.8, 69.6, 67.6 ppm.

IR (thin film) 3323, 3183, 1674, 1637, 1488, 1366, 1254, 1156, 1074, 958 cm<sup>-1</sup>.

HRMS (CI+) Calcd for C<sub>10</sub>H<sub>11</sub>N<sub>2</sub>O<sub>3</sub> [M + H]<sup>+</sup>: 207.0764, Found: 207.0778.

---

[5] K. M. Nelson, C. E. Salomon and C. C. Aldrich, *J. Nat. Prod.* **2012**, *75*, 1037–1043.

## VI. Product Structure Determination

The structure and stereochemistry of products **2s** and **4d** were determined by X-ray diffraction. The X-ray data of **2s** (CCDC 1908430) and **4d** (CCDC 1908431) have been deposited at the Cambridge Crystallographic Data Center.

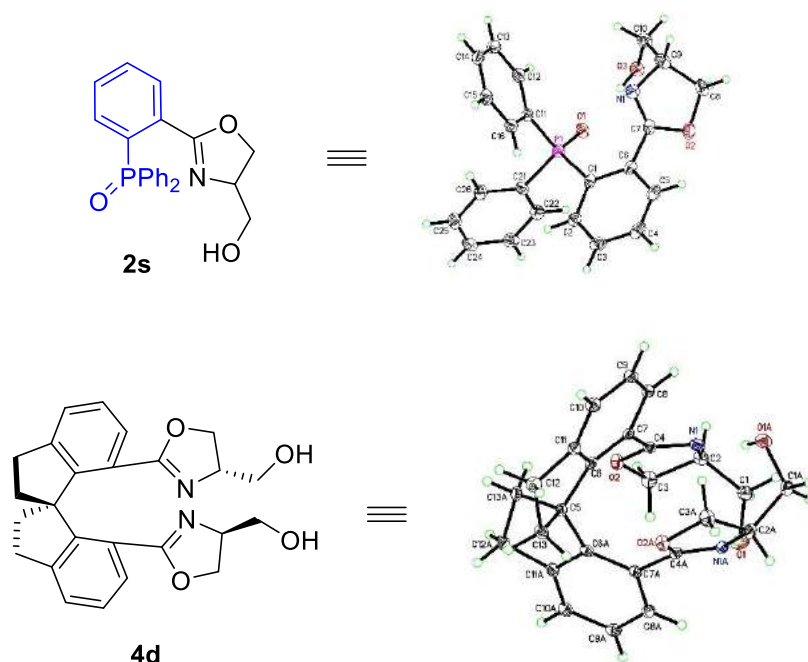

**Table S1. Crystal data and structure refinement for 2s.**

|                       |                                                   |
|-----------------------|---------------------------------------------------|
| Identification code   | <b>2s</b>                                         |
| Empirical formula     | C <sub>22</sub> H <sub>20</sub> NO <sub>3</sub> P |
| Formula weight        | 377.36                                            |
| Temperature/K         | 100.01(10)                                        |
| Crystal system        | monoclinic                                        |
| Space group           | P2 <sub>1</sub>                                   |
| a/Å                   | 9.5956(3)                                         |
| b/Å                   | 9.7344(4)                                         |
| c/Å                   | 10.4231(4)                                        |
| α/°                   | 90                                                |
| β/°                   | 93.158(3)                                         |
| γ/°                   | 90                                                |
| Volume/Å <sup>3</sup> | 972.12(6)                                         |
| Z                     | 2                                                 |

|                                                |                                                               |
|------------------------------------------------|---------------------------------------------------------------|
| $\rho_{\text{calc}}/\text{cm}^3$               | 1.289                                                         |
| $\mu/\text{mm}^{-1}$                           | 1.431                                                         |
| F(000)                                         | 396.0                                                         |
| Crystal size/ $\text{mm}^3$                    | $0.2 \times 0.03 \times 0.02$                                 |
| Radiation                                      | CuK $\alpha$ ( $\lambda = 1.54184$ )                          |
| 2 $\Theta$ range for data collection/ $^\circ$ | 8.496 to 134.976                                              |
| Index ranges                                   | $-11 \leq h \leq 11, -9 \leq k \leq 11, -12 \leq l \leq 12$   |
| Reflections collected                          | 5136                                                          |
| Independent reflections                        | 2411 [ $R_{\text{int}} = 0.0327, R_{\text{sigma}} = 0.0434$ ] |
| Data/restraints/parameters                     | 2411/1/245                                                    |
| Completeness to $\theta = 66.5^\circ$          | 99.1%                                                         |
| Goodness-of-fit on $F^2$                       | 1.002                                                         |
| Final R indexes [ $I \geq 2\sigma(I)$ ]        | $R_1 = 0.0327, wR_2 = 0.0757$                                 |
| Final R indexes [all data]                     | $R_1 = 0.0366, wR_2 = 0.0770$                                 |
| Largest diff. peak/hole / $e \text{ \AA}^{-3}$ | 0.34/-0.19                                                    |
| Flack parameter                                | 0.01(3)                                                       |

**Table S2. Fractional Atomic Coordinates ( $\times 10^4$ ) and Equivalent Isotropic Displacement Parameters ( $\text{\AA}^2 \times 10^3$ ) for 2s.  $U_{\text{eq}}$  is defined as 1/3 of the trace of the orthogonalised  $U_{\text{H}}$  tensor.**

| Atom | $x$        | $y$        | $z$        | $U(\text{eq})$ |
|------|------------|------------|------------|----------------|
| P1   | 2647.5 (6) | 3212.1 (7) | 3460.4 (6) | 19.29 (16)     |
| O1   | 2186 (2)   | 1857 (2)   | 2933 (2)   | 24.9 (5)       |
| O2   | 5752 (2)   | 617 (2)    | 1995 (2)   | 30.5 (5)       |
| O3   | 2331 (2)   | 163 (2)    | 917 (2)    | 26.3 (5)       |
| N1   | 4471 (2)   | 2329 (3)   | 1050 (2)   | 24.1 (5)       |
| C1   | 4495 (3)   | 3320 (3)   | 3934 (2)   | 20.8 (5)       |
| C2   | 4925 (3)   | 4041 (3)   | 5039 (3)   | 25.0 (6)       |
| C3   | 6325 (3)   | 4140 (3)   | 5443 (3)   | 29.9 (7)       |
| C4   | 7320 (3)   | 3476 (4)   | 4747 (3)   | 32.8 (8)       |
| C5   | 6915 (3)   | 2735 (3)   | 3659 (3)   | 28.3 (7)       |
| C6   | 5507 (3)   | 2658 (3)   | 3227 (3)   | 21.4 (6)       |
| C7   | 5180 (3)   | 1892 (3)   | 2021 (3)   | 21.5 (6)       |
| C8   | 5370 (3)   | 83 (4)     | 715 (3)    | 31.1 (7)       |
| C9   | 4426 (3)   | 1203 (4)   | 101 (3)    | 28.8 (7)       |
| C10  | 2918 (3)   | 738 (4)    | -180 (3)   | 30.4 (7)       |
| C11  | 2269 (3)   | 4632 (3)   | 2382 (3)   | 21.9 (6)       |

|     |          |          |          |          |
|-----|----------|----------|----------|----------|
| C12 | 1263 (3) | 4435 (3) | 1374 (3) | 26.1 (6) |
| C13 | 922 (3)  | 5520 (4) | 548 (3)  | 32.3 (7) |
| C14 | 1572 (3) | 6779 (4) | 706 (3)  | 30.1 (7) |
| C15 | 2563 (3) | 6975 (4) | 1722 (3) | 27.7 (6) |
| C16 | 2916 (3) | 5905 (3) | 2542 (3) | 23.8 (6) |
| C21 | 1747 (3) | 3561 (3) | 4913 (3) | 23.2 (7) |
| C22 | 1603 (3) | 2459 (4) | 5747 (3) | 28.3 (7) |
| C23 | 875 (3)  | 2622 (4) | 6855 (3) | 30.7 (7) |
| C24 | 310 (3)  | 3901 (4) | 7127 (3) | 27.6 (7) |
| C25 | 460 (3)  | 4988 (4) | 6307 (3) | 28.1 (7) |
| C26 | 1176 (3) | 4825 (3) | 5187 (3) | 25.0 (6) |

**Table S3. Anisotropic Displacement Parameters ( $\text{\AA}^2 \times 10^3$ ) for 2s. The Anisotropic displacement factor exponent takes the form:  $-2\pi^2[h^2a^*U_{11}+2hka^*b^*U_{12}+\dots]$ .**

| Atom | U <sub>11</sub> | U <sub>22</sub> | U <sub>33</sub> | U <sub>23</sub> | U <sub>13</sub> | U <sub>12</sub> |
|------|-----------------|-----------------|-----------------|-----------------|-----------------|-----------------|
| P1   | 14.9 (3)        | 21.0 (3)        | 22.2 (3)        | -1.3 (3)        | 2.6 (2)         | -0.6 (3)        |
| O1   | 19.2 (9)        | 27.8 (11)       | 28.2 (11)       | -3.6 (9)        | 6.0 (8)         | -2.7 (8)        |
| O2   | 27.4 (11)       | 26.0 (12)       | 38.0 (12)       | -4.6 (10)       | 0.2 (9)         | 7.4 (9)         |
| O3   | 23.0 (9)        | 27.8 (12)       | 28.5 (11)       | -3.7 (9)        | 3.7 (8)         | -3.1 (8)        |
| N1   | 20.7 (11)       | 26.5 (14)       | 25.4 (12)       | 1.7 (10)        | 4.3 (9)         | -2.1 (9)        |
| C1   | 20.4 (12)       | 16.8 (13)       | 25.2 (12)       | 4.3 (13)        | 1.4 (10)        | 1.8 (12)        |
| C2   | 24.9 (14)       | 22.1 (16)       | 27.7 (14)       | 1.9 (13)        | -0.3 (11)       | 2.2 (12)        |
| C3   | 29.8 (15)       | 29.6 (17)       | 29.2 (15)       | -0.9 (13)       | -7.9 (12)       | -4.6 (13)       |
| C4   | 19.8 (13)       | 36 (2)          | 41.3 (17)       | 2.7 (14)        | -8.5 (12)       | -0.3 (12)       |
| C5   | 17.1 (13)       | 30.0 (17)       | 37.4 (17)       | 3.4 (13)        | -1.2 (12)       | 1.7 (12)        |
| C6   | 18.5 (12)       | 18.5 (13)       | 27.1 (15)       | 4.7 (12)        | 1.0 (11)        | -1.3 (11)       |
| C7   | 14.7 (12)       | 21.3 (15)       | 29.3 (14)       | 2.7 (12)        | 7.2 (10)        | -0.6 (11)       |
| C8   | 25.2 (14)       | 33.0 (18)       | 36.0 (16)       | -9.9 (14)       | 9.7 (12)        | -0.4 (13)       |
| C9   | 28.4 (15)       | 34.2 (18)       | 24.4 (14)       | -2.0 (14)       | 7.4 (12)        | -7.4 (13)       |
| C10  | 28.8 (15)       | 36.3 (19)       | 25.7 (14)       | -5.5 (13)       | -0.8 (12)       | -4.2 (14)       |
| C11  | 17.2 (12)       | 26.0 (15)       | 22.8 (13)       | 0.8 (12)        | 3.2 (10)        | 4.3 (11)        |
| C12  | 17.9 (13)       | 30.6 (17)       | 29.8 (15)       | -6.4 (13)       | 1.7 (11)        | -0.4 (11)       |
| C13  | 22.7 (14)       | 47 (2)          | 26.5 (15)       | -6.4 (14)       | -0.9 (11)       | 10.7 (14)       |
| C14  | 27.8 (14)       | 37.3 (19)       | 25.5 (14)       | 4.9 (14)        | 4.9 (12)        | 13.3 (14)       |
| C15  | 22.9 (13)       | 29.0 (17)       | 31.9 (16)       | 2.6 (14)        | 8.7 (12)        | 2.7 (13)        |
| C16  | 17.6 (12)       | 28.5 (17)       | 25.4 (14)       | -2.5 (12)       | 2.9 (11)        | -0.4 (11)       |
| C21  | 15.2 (11)       | 32.2 (19)       | 22.3 (13)       | -6.0 (11)       | 3.2 (10)        | -1.5 (10)       |
| C22  | 27.3 (14)       | 28.6 (17)       | 29.1 (16)       | -0.3 (13)       | 2.2 (12)        | 1.6 (12)        |
| C23  | 29.5 (15)       | 37.7 (18)       | 25.0 (16)       | 2.0 (14)        | 2.2 (12)        | -2.5 (14)       |

|     |           |           |           |           |          |           |
|-----|-----------|-----------|-----------|-----------|----------|-----------|
| C24 | 18.3 (13) | 39.9 (19) | 24.8 (14) | -8.6 (14) | 3.9 (11) | -6.2 (13) |
| C25 | 14.8 (12) | 33.4 (17) | 36.3 (16) | -7.4 (14) | 3.6 (11) | 1.5 (12)  |
| C26 | 18.0 (12) | 25.2 (15) | 32.1 (15) | -1.2 (13) | 3.4 (11) | -1.6 (11) |

**Table S4. Bond Lengths for 2s.**

| Atom | Atom | Length/Å  | Atom | Atom | Length/Å  |
|------|------|-----------|------|------|-----------|
| P1   | O1   | 1.487 (2) | C6   | C7   | 1.481 (4) |
| P1   | C1   | 1.817 (3) | C8   | C9   | 1.535 (5) |
| P1   | C11  | 1.806 (3) | C9   | C10  | 1.529 (4) |
| P1   | C21  | 1.816 (3) | C11  | C12  | 1.400 (4) |
| O2   | C7   | 1.358 (4) | C11  | C16  | 1.392 (4) |
| O2   | C8   | 1.460 (4) | C12  | C13  | 1.390 (5) |
| O3   | C10  | 1.418 (4) | C13  | C14  | 1.382 (5) |
| N1   | C7   | 1.261 (4) | C14  | C15  | 1.396 (5) |
| N1   | C9   | 1.475 (4) | C15  | C16  | 1.378 (5) |
| C1   | C2   | 1.392 (4) | C21  | C22  | 1.392 (5) |
| C1   | C6   | 1.406 (4) | C21  | C26  | 1.383 (4) |
| C2   | C3   | 1.389 (4) | C22  | C23  | 1.391 (5) |
| C3   | C4   | 1.390 (5) | C23  | C24  | 1.393 (5) |
| C4   | C5   | 1.382 (5) | C24  | C25  | 1.373 (5) |
| C5   | C6   | 1.402 (4) | C25  | C26  | 1.396 (4) |

**Table S5. Bond Angles for 2s.**

| Atom | Atom | Atom | Angle/°     | Atom | Atom | Atom | Angle/°   |
|------|------|------|-------------|------|------|------|-----------|
| O1   | P1   | C1   | 114.69 (13) | O2   | C8   | C9   | 103.9 (2) |
| O1   | P1   | C11  | 113.78 (13) | N1   | C9   | C8   | 104.7 (2) |
| O1   | P1   | C21  | 109.17 (13) | N1   | C9   | C10  | 109.9 (2) |
| C11  | P1   | C1   | 106.54 (13) | C10  | C9   | C8   | 113.6 (3) |
| C11  | P1   | C21  | 106.70 (13) | O3   | C10  | C9   | 112.1 (2) |
| C21  | P1   | C1   | 105.36 (12) | C12  | C11  | P1   | 118.0 (2) |
| C7   | O2   | C8   | 105.2 (2)   | C16  | C11  | P1   | 122.2 (2) |
| C7   | N1   | C9   | 106.4 (3)   | C16  | C11  | C12  | 119.8 (3) |
| C2   | C1   | P1   | 119.6 (2)   | C13  | C12  | C11  | 119.3 (3) |
| C2   | C1   | C6   | 118.9 (2)   | C14  | C13  | C12  | 120.7 (3) |
| C6   | C1   | P1   | 121.5 (2)   | C13  | C14  | C15  | 119.7 (3) |
| C3   | C2   | C1   | 121.6 (3)   | C16  | C15  | C14  | 120.1 (3) |
| C2   | C3   | C4   | 119.4 (3)   | C15  | C16  | C11  | 120.4 (3) |

|    |    |    |          |     |     |     |          |
|----|----|----|----------|-----|-----|-----|----------|
| C5 | C4 | C3 | 120.0(3) | C22 | C21 | P1  | 116.4(2) |
| C4 | C5 | C6 | 120.9(3) | C26 | C21 | P1  | 123.4(2) |
| C1 | C6 | C7 | 123.7(2) | C26 | C21 | C22 | 120.1(3) |
| C5 | C6 | C1 | 119.2(3) | C23 | C22 | C21 | 120.2(3) |
| C5 | C6 | C7 | 117.0(3) | C22 | C23 | C24 | 119.3(3) |
| O2 | C7 | C6 | 114.2(2) | C25 | C24 | C23 | 120.4(3) |
| N1 | C7 | O2 | 119.6(3) | C24 | C25 | C26 | 120.4(3) |
| N1 | C7 | C6 | 126.2(3) | C21 | C26 | C25 | 119.6(3) |

**Table S6. Hydrogen Bonds for 2s.**

| D  | H  | A  | d(D-H)/Å | d(H-A)/Å | d(D-A)/Å | D-H-A/° |
|----|----|----|----------|----------|----------|---------|
| O3 | H3 | O1 | 0.84     | 1.85     | 2.681(3) | 170.6   |

**Table S7. Torsion Angles for 2s.**

| A  | B   | C   | D   | Angle/°   | A   | B   | C   | D   | Angle/°   |
|----|-----|-----|-----|-----------|-----|-----|-----|-----|-----------|
| P1 | C1  | C2  | C3  | 179.4(2)  | C5  | C6  | C7  | N1  | -127.5(3) |
| P1 | C1  | C6  | C5  | -177.9(2) | C6  | C1  | C2  | C3  | 1.2(5)    |
| P1 | C1  | C6  | C7  | 3.4(4)    | C7  | O2  | C8  | C9  | -4.1(3)   |
| P1 | C11 | C12 | C13 | 178.3(2)  | C7  | N1  | C9  | C8  | -4.6(3)   |
| P1 | C11 | C16 | C15 | -177.8(2) | C7  | N1  | C9  | C10 | 117.8(3)  |
| P1 | C21 | C22 | C23 | -177.3(2) | C8  | O2  | C7  | N1  | 1.4(3)    |
| P1 | C21 | C26 | C25 | 177.8(2)  | C8  | O2  | C7  | C6  | -177.0(2) |
| O1 | P1  | C1  | C2  | -141.2(2) | C8  | C9  | C10 | O3  | 52.6(4)   |
| O1 | P1  | C1  | C6  | 37.0(3)   | C9  | N1  | C7  | O2  | 2.2(3)    |
| O1 | P1  | C11 | C12 | 18.4(3)   | C9  | N1  | C7  | C6  | -179.7(3) |
| O1 | P1  | C11 | C16 | -163.1(2) | C11 | P1  | C1  | C2  | 92.0(3)   |
| O1 | P1  | C21 | C22 | 41.2(2)   | C11 | P1  | C1  | C6  | -89.8(3)  |
| O1 | P1  | C21 | C26 | -136.4(2) | C11 | P1  | C21 | C22 | 164.6(2)  |
| O2 | C8  | C9  | N1  | 5.2(3)    | C11 | P1  | C21 | C26 | -13.1(3)  |
| O2 | C8  | C9  | C10 | -114.7(3) | C11 | C12 | C13 | C14 | 0.6(5)    |
| N1 | C9  | C10 | O3  | -64.3(3)  | C12 | C11 | C16 | C15 | 0.7(4)    |
| C1 | P1  | C11 | C12 | 145.8(2)  | C12 | C13 | C14 | C15 | -1.3(5)   |
| C1 | P1  | C11 | C16 | -35.7(3)  | C13 | C14 | C15 | C16 | 1.7(5)    |
| C1 | P1  | C21 | C22 | -82.4(2)  | C14 | C15 | C16 | C11 | -1.4(4)   |
| C1 | P1  | C21 | C26 | 99.9(2)   | C16 | C11 | C12 | C13 | -0.3(4)   |
| C1 | C2  | C3  | C4  | -1.6(5)   | C21 | P1  | C1  | C2  | -21.1(3)  |
| C1 | C6  | C7  | O2  | -130.5(3) | C21 | P1  | C1  | C6  | 157.1(2)  |

|             |            |                 |            |
|-------------|------------|-----------------|------------|
| C1 C6 C7 N1 | 51.2 (4)   | C21 P1 C11 C12  | -102.1 (2) |
| C2 C1 C6 C5 | 0.4 (4)    | C21 P1 C11 C16  | 76.4 (3)   |
| C2 C1 C6 C7 | -178.4 (3) | C21 C22 C23 C24 | -0.8 (5)   |
| C2 C3 C4 C5 | 0.5 (5)    | C22 C21 C26 C25 | 0.3 (4)    |
| C3 C4 C5 C6 | 1.0 (5)    | C22 C23 C24 C25 | 0.5 (5)    |
| C4 C5 C6 C1 | -1.4 (5)   | C23 C24 C25 C26 | 0.3 (4)    |
| C4 C5 C6 C7 | 177.4 (3)  | C24 C25 C26 C21 | -0.6 (4)   |
| C5 C6 C7 O2 | 50.7 (4)   | C26 C21 C22 C23 | 0.5 (4)    |

**Table S8. Hydrogen Atom Coordinates ( $\text{\AA}\times 10^4$ ) and Isotropic Displacement Parameters ( $\text{\AA}^2\times 10^3$ ) for 2s.**

| Atom | x    | y    | z    | U(eq) |
|------|------|------|------|-------|
| H3   | 2359 | 744  | 1514 | 40    |
| H2   | 4245 | 4476 | 5528 | 30    |
| H3A  | 6600 | 4656 | 6187 | 36    |
| H4   | 8280 | 3531 | 5020 | 39    |
| H5   | 7599 | 2272 | 3196 | 34    |
| H8A  | 4862 | -799 | 768  | 37    |
| H8B  | 6208 | -58  | 218  | 37    |
| H9   | 4825 | 1529 | -711 | 35    |
| H10A | 2349 | 1535 | -481 | 36    |
| H10B | 2891 | 47   | -878 | 36    |
| H12  | 819  | 3569 | 1255 | 31    |
| H13  | 233  | 5393 | -133 | 39    |
| H14  | 1346 | 7509 | 126  | 36    |
| H15  | 2993 | 7848 | 1847 | 33    |
| H16  | 3606 | 6037 | 3220 | 29    |
| H22  | 2003 | 1594 | 5560 | 34    |
| H23  | 765  | 1869 | 7421 | 37    |
| H24  | -183 | 4021 | 7885 | 33    |
| H25  | 74   | 5857 | 6503 | 34    |
| H26  | 1270 | 5576 | 4617 | 30    |

**Table S9. Crystal data and structure refinement for 4d.**

|                     |                                                  |
|---------------------|--------------------------------------------------|
| Identification code | <b>4d</b>                                        |
| Empirical formula   | $\text{C}_{25}\text{H}_{26}\text{N}_2\text{O}_4$ |
| Formula weight      | 418.48                                           |



|                                             |                                                                |
|---------------------------------------------|----------------------------------------------------------------|
| Temperature/K                               | 100.00(10)                                                     |
| Crystal system                              | monoclinic                                                     |
| Space group                                 | C2                                                             |
| a/Å                                         | 12.1435(3)                                                     |
| b/Å                                         | 10.3089(2)                                                     |
| c/Å                                         | 8.5206(2)                                                      |
| $\alpha$ /°                                 | 90                                                             |
| $\beta$ /°                                  | 106.293(3)                                                     |
| $\gamma$ /°                                 | 90                                                             |
| Volume/Å <sup>3</sup>                       | 1023.82(5)                                                     |
| Z                                           | 2                                                              |
| $\rho_{\text{calc}}$ /cm <sup>3</sup>       | 1.357                                                          |
| $\mu$ /mm <sup>-1</sup>                     | 0.747                                                          |
| F(000)                                      | 444.0                                                          |
| Crystal size/mm <sup>3</sup>                | 0.2 × 0.2 × 0.18                                               |
| Radiation                                   | CuK $\alpha$ ( $\lambda$ = 1.54184)                            |
| 2 $\Theta$ range for data collection/°      | 11.46 to 134.992                                               |
| Index ranges                                | -9 ≤ h ≤ 14, -12 ≤ k ≤ 7, -9 ≤ l ≤ 10                          |
| Reflections collected                       | 1521                                                           |
| Independent reflections                     | 1226 [ $R_{\text{int}}$ = 0.0055, $R_{\text{sigma}}$ = 0.0103] |
| Data/restraints/parameters                  | 1226/1/142                                                     |
| Goodness-of-fit on F <sup>2</sup>           | 1.026                                                          |
| Final R indexes [ $I \geq 2\sigma(I)$ ]     | $R_1$ = 0.0230, $wR_2$ = 0.0610                                |
| Final R indexes [all data]                  | $R_1$ = 0.0233, $wR_2$ = 0.0612                                |
| Largest diff. peak/hole / e Å <sup>-3</sup> | 0.15/-0.15                                                     |
| Flack parameter                             | 0.11(7)                                                        |

**Table S10. Fractional Atomic Coordinates ( $\times 10^4$ ) and Equivalent Isotropic Displacement Parameters ( $\text{\AA}^2 \times 10^3$ ) for 4d.  $U_{\text{eq}}$  is defined as 1/3 of the trace of the orthogonalised  $U_{\text{ij}}$  tensor.**

| Atom | x           | y            | z           | U(eq)    |
|------|-------------|--------------|-------------|----------|
| O1   | 4171.3 (10) | -1283.0 (14) | 2385.4 (14) | 23.8 (3) |
| O2   | 6252.3 (10) | 1689.4 (12)  | 3399.9 (13) | 18.0 (3) |
| N1   | 6294.0 (11) | -158.0 (15)  | 4838.4 (16) | 15.0 (3) |
| C1   | 5323.6 (14) | -1663.7 (19) | 2600 (2)    | 21.1 (4) |
| C2   | 6196.5 (15) | -586.0 (19)  | 3145 (2)    | 18.1 (4) |
| C3   | 5928.0 (16) | 671 (2)      | 2162 (2)    | 21.0 (4) |
| C4   | 6332.5 (13) | 1073.4 (18)  | 4834.9 (19) | 13.2 (4) |
| C5   | 5000        | 3754 (3)     | 5000        | 14.3 (5) |
| C6   | 5866.0 (14) | 3025.8 (17)  | 6354.3 (19) | 13.8 (4) |

|     |             |             |             |          |
|-----|-------------|-------------|-------------|----------|
| C7  | 6483.8 (13) | 1891.5 (17) | 6311.4 (19) | 13.7 (4) |
| C8  | 7271.1 (14) | 1456.8 (17) | 7752 (2)    | 15.5 (4) |
| C9  | 7457.7 (14) | 2150.4 (18) | 9193 (2)    | 17.4 (4) |
| C10 | 6845.0 (14) | 3281.8 (18) | 9242 (2)    | 18.3 (4) |
| C11 | 6043.6 (13) | 3703.9 (18) | 7831 (2)    | 16.6 (4) |
| C12 | 5298.5 (15) | 4892.8 (19) | 7607 (2)    | 20.7 (4) |
| C13 | 4374.1 (14) | 4614.3 (18) | 5984.7 (19) | 17.6 (4) |

**Table S11. Anisotropic Displacement Parameters ( $\text{\AA}^2 \times 10^3$ ) for 4d. The Anisotropic displacement factor exponent takes the form:  $-2\pi^2[h^2a^*2U_{11}+2hka^*b^*U_{12}+\dots]$ .**

| Atom | U <sub>11</sub> | U <sub>22</sub> | U <sub>33</sub> | U <sub>23</sub> | U <sub>13</sub> | U <sub>12</sub> |
|------|-----------------|-----------------|-----------------|-----------------|-----------------|-----------------|
| O1   | 19.5 (6)        | 30.4 (8)        | 20.1 (6)        | -9.8 (6)        | 3.0 (5)         | -0.7 (6)        |
| O2   | 24.8 (7)        | 16.2 (7)        | 13.2 (5)        | 0.4 (5)         | 5.9 (5)         | -0.8 (5)        |
| N1   | 14.0 (7)        | 15.1 (7)        | 15.2 (7)        | -1.2 (5)        | 2.8 (5)         | 1.8 (6)         |
| C1   | 21.2 (8)        | 18.6 (9)        | 22.5 (8)        | -5.8 (8)        | 4.2 (7)         | 2.3 (7)         |
| C2   | 18.8 (8)        | 20 (1)          | 16.2 (7)        | -3.5 (7)        | 6.2 (6)         | 3.2 (7)         |
| C3   | 27.3 (9)        | 22.3 (10)       | 14.2 (8)        | -2.5 (7)        | 7.2 (7)         | -1.3 (8)        |
| C4   | 11.1 (8)        | 14.8 (9)        | 13.9 (8)        | 1.9 (7)         | 4.0 (6)         | 0.9 (6)         |
| C5   | 15.5 (10)       | 11.7 (12)       | 14.9 (10)       | 0               | 3.0 (9)         | 0               |
| C6   | 13.7 (7)        | 14.4 (9)        | 13.0 (7)        | 0.3 (6)         | 3.2 (6)         | -4.1 (6)        |
| C7   | 12.7 (7)        | 13.7 (9)        | 14.9 (7)        | 0.9 (7)         | 4.2 (6)         | -3.3 (7)        |
| C8   | 14.7 (7)        | 14.9 (9)        | 17.1 (7)        | 2.4 (6)         | 4.8 (6)         | -0.3 (6)        |
| C9   | 16.7 (8)        | 20.3 (9)        | 13.5 (7)        | 4.2 (6)         | 1.2 (6)         | -1.5 (7)        |
| C10  | 19.9 (8)        | 20.7 (10)       | 13.2 (7)        | -1.8 (7)        | 2.8 (7)         | -2.2 (7)        |
| C11  | 16.0 (8)        | 16.0 (9)        | 17.8 (8)        | -1.1 (7)        | 4.5 (6)         | -2.0 (7)        |
| C12  | 23.6 (8)        | 18.6 (10)       | 16.9 (8)        | -6.3 (7)        | 0.7 (7)         | 1.3 (7)         |
| C13  | 19.8 (8)        | 14.2 (9)        | 16.7 (8)        | -2.3 (7)        | 1.8 (7)         | 3.1 (7)         |

**Table S12. Bond Lengths for 4d.**

| Atom Atom | Length/\AA | Atom Atom           | Length/\AA |
|-----------|------------|---------------------|------------|
| O1 C1     | 1.415 (2)  | C5 C13              | 1.558 (2)  |
| O2 C3     | 1.462 (2)  | C5 C13 <sup>1</sup> | 1.558 (2)  |
| O2 C4     | 1.357 (2)  | C6 C7               | 1.395 (3)  |
| N1 C2     | 1.482 (2)  | C6 C11              | 1.402 (2)  |
| N1 C4     | 1.270 (2)  | C7 C8               | 1.401 (2)  |
| C1 C2     | 1.516 (3)  | C8 C9               | 1.384 (2)  |
| C2 C3     | 1.527 (3)  | C9 C10              | 1.390 (3)  |

|    |                 |           |     |     |           |
|----|-----------------|-----------|-----|-----|-----------|
| C4 | C7              | 1.483 (2) | C10 | C11 | 1.388 (2) |
| C5 | C6 <sup>1</sup> | 1.523 (2) | C11 | C12 | 1.503 (3) |
| C5 | C6              | 1.523 (2) | C12 | C13 | 1.543 (2) |

<sup>1</sup>1-X,+Y,1-Z

**Table S13. Bond Angles for 4d.**

| Atom            | Atom | Atom             | Angle/°     | Atom | Atom | Atom             | Angle/°     |
|-----------------|------|------------------|-------------|------|------|------------------|-------------|
| C4              | O2   | C3               | 104.51 (13) | C13  | C5   | C13 <sup>1</sup> | 110.6 (2)   |
| C4              | N1   | C2               | 106.75 (15) | C7   | C6   | C5               | 130.93 (15) |
| O1              | C1   | C2               | 114.69 (15) | C7   | C6   | C11              | 119.53 (15) |
| N1              | C2   | C1               | 111.98 (14) | C11  | C6   | C5               | 109.50 (15) |
| N1              | C2   | C3               | 103.16 (14) | C6   | C7   | C4               | 124.02 (15) |
| C1              | C2   | C3               | 115.50 (15) | C6   | C7   | C8               | 119.00 (15) |
| O2              | C3   | C2               | 103.95 (12) | C8   | C7   | C4               | 116.95 (15) |
| O2              | C4   | C7               | 117.32 (15) | C9   | C8   | C7               | 120.92 (15) |
| N1              | C4   | O2               | 118.45 (15) | C8   | C9   | C10              | 120.28 (15) |
| N1              | C4   | C7               | 124.22 (15) | C11  | C10  | C9               | 119.23 (15) |
| C6 <sup>1</sup> | C5   | C6               | 121.0 (2)   | C6   | C11  | C12              | 110.92 (14) |
| C6 <sup>1</sup> | C5   | C13              | 110.56 (8)  | C10  | C11  | C6               | 121.00 (16) |
| C6              | C5   | C13              | 102.13 (9)  | C10  | C11  | C12              | 128.05 (15) |
| C6 <sup>1</sup> | C5   | C13 <sup>1</sup> | 102.13 (9)  | C11  | C12  | C13              | 102.86 (14) |
| C6              | C5   | C13 <sup>1</sup> | 110.56 (8)  | C12  | C13  | C5               | 104.24 (12) |

<sup>1</sup>1-X,+Y,1-Z

**Table S14. Hydrogen Bonds for 4d.**

| D  | H  | A               | d(D-H)/Å | d(H-A)/Å | d(D-A)/Å    | D-H-A/° |
|----|----|-----------------|----------|----------|-------------|---------|
| O1 | H1 | N1 <sup>1</sup> | 0.84     | 2.00     | 2.8302 (19) | 169.9   |

<sup>1</sup>1-X,+Y,1-Z

**Table S15. Torsion Angles for 4d.**

| A  | B  | C  | D  | Angle/°    | A               | B  | C   | D   | Angle/°      |
|----|----|----|----|------------|-----------------|----|-----|-----|--------------|
| O1 | C1 | C2 | N1 | 68.64 (19) | C6 <sup>1</sup> | C5 | C6  | C11 | -143.94 (13) |
| O1 | C1 | C2 | C3 | -49.1 (2)  | C6              | C5 | C13 | C12 | 30.96 (18)   |

|                         |             |                            |             |
|-------------------------|-------------|----------------------------|-------------|
| O2 C4C7 C6              | 44.1(2)     | C6 <sup>1</sup> C5 C13C12  | 160.95(15)  |
| O2 C4C7 C8              | -138.17(15) | C6 C7 C8 C9                | -1.4(2)     |
| N1 C2C3 O2              | 17.12(15)   | C6 C11C12C13               | 18.04(19)   |
| N1 C4C7 C6              | -137.13(17) | C7 C6 C11C10               | 1.6(2)      |
| N1 C4C7 C8              | 40.6(2)     | C7 C6 C11C12               | 179.84(15)  |
| C1 C2C3 O2              | 139.63(14)  | C7 C8 C9 C10               | 1.4(2)      |
| C2 N1C4 O2              | 1.6(2)      | C8 C9 C10C11               | 0.2(2)      |
| C2 N1C4 C7              | -177.10(14) | C9 C10C11C6                | -1.7(2)     |
| C3 O2C4 N1              | 10.01(19)   | C9 C10C11C12               | -179.58(17) |
| C3 O2C4 C7              | -171.19(14) | C10 C11C12C13              | -163.86(17) |
| C4 O2C3 C2              | -16.31(15)  | C11 C6 C7 C4               | 177.60(15)  |
| C4 N1C2 C1              | -136.77(16) | C11 C6 C7 C8               | 0.0(2)      |
| C4 N1C2 C3              | -11.93(17)  | C11 C12C13C5               | -30.05(18)  |
| C4 C7C8 C9              | -179.25(15) | C13 C5 C6 C7               | 161.61(17)  |
| C5 C6C7 C4              | -4.9(3)     | C13 <sup>1</sup> C5 C6 C7  | -80.7(2)    |
| C5 C6C7 C8              | 177.41(15)  | C13 C5 C6 C11              | -20.73(18)  |
| C5 C6C11C10             | -176.37(14) | C13 <sup>1</sup> C5 C6 C11 | 96.94(16)   |
| C5 C6C11C12             | 1.88(18)    | C13 <sup>1</sup> C5 C13C12 | -86.70(13)  |
| C6 <sup>1</sup> C5C6 C7 | 38.40(15)   |                            |             |

<sup>1</sup>1-X,+Y,I-Z

**Table S16. Hydrogen Atom Coordinates ( $\text{\AA}\times 10^4$ ) and Isotropic Displacement Parameters ( $\text{\AA}^2\times 10^3$ ) for 4d.**

| Atom | x    | y     | z     | U(eq) |
|------|------|-------|-------|-------|
| H1   | 4093 | -1014 | 3278  | 36    |
| H1A  | 5394 | -2021 | 1555  | 25    |
| H1B  | 5512 | -2369 | 3422  | 25    |
| H2   | 6962 | -911  | 3096  | 22    |
| H3A  | 6382 | 734   | 1366  | 25    |
| H3B  | 5102 | 725   | 1568  | 25    |
| H8   | 7682 | 675   | 7739  | 19    |
| H9   | 8007 | 1852  | 10154 | 21    |
| H10  | 6973 | 3760  | 10230 | 22    |
| H12A | 5741 | 5684  | 7523  | 25    |
| H12B | 4952 | 4996  | 8521  | 25    |
| H13A | 4096 | 5430  | 5392  | 21    |
| H13B | 3714 | 4147  | 6185  | 21    |

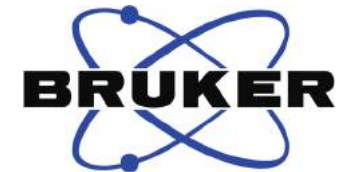

Current Data Parameters  
NAME YW-1543  
EXPNO 1  
PROCNO 1

F2 - Acquisition Parameters  
Date\_ 20160120  
Time 20.05  
INSTRUM spect  
PROBHD 5 mm PABBO BB/  
PULPROG zg30  
TD 65536  
SOLVENT CDCl3  
NS 4  
DS 0  
SWH 8012.820 Hz  
FIDRES 0.122266 Hz  
AQ 4.0894465 sec  
RG 82.92  
DW 62.400 usec  
DE 6.50 usec  
TE 301.8 K  
D1 1.00000000 sec  
TD0 1

==== CHANNEL f1 =====  
SFO1 400.1324710 MHz  
NUC1 1H  
P1 14.50 usec  
PLW1 11.99499989 W

F2 - Processing parameters  
SI 65536  
SF 400.1300090 MHz  
WDW EM  
SSB 0  
LB 0.30 Hz  
GB 0  
PC 1.00

7.817  
7.794  
7.774  
7.530  
7.527  
7.511  
7.493  
7.440  
7.421  
7.402  
7.260  
7.025  
6.956  
5.246  
5.229  
5.212  
5.195  
5.005  
4.998  
4.988  
4.981  
4.963  
4.620  
4.604  
4.588

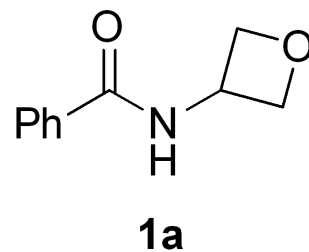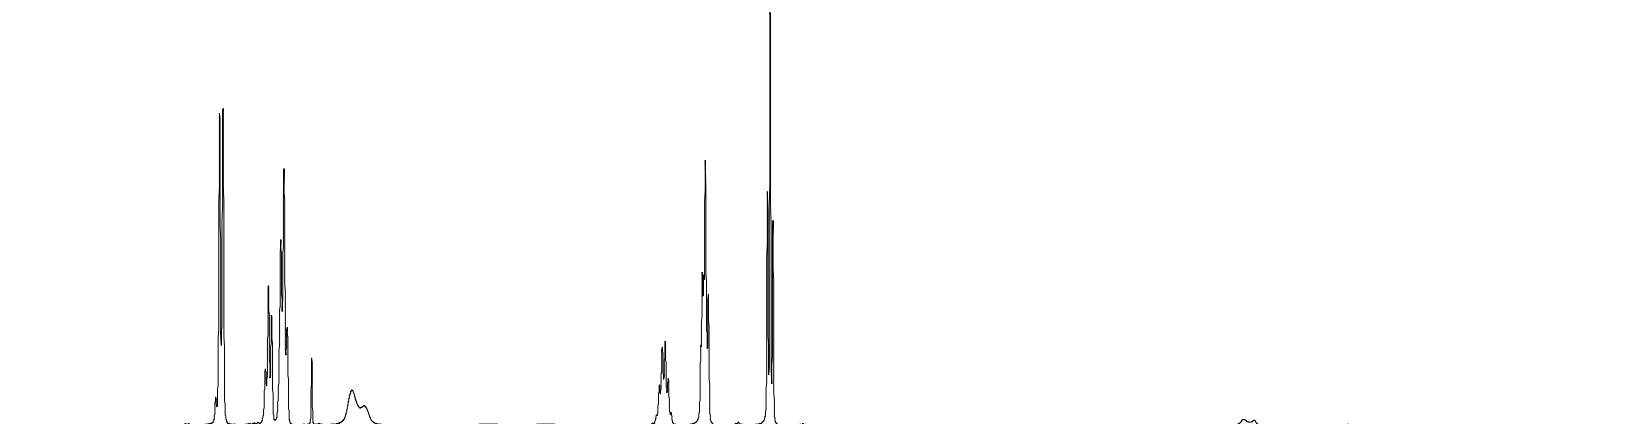

8.5 8.0 7.5 7.0 6.5 6.0 5.5 5.0 4.5 4.0 3.5 3.0 2.5 2.0 1.5 1.0 0.5 ppm

2.11  
1.07  
2.13  
0.90  
1.00  
2.02  
2.01

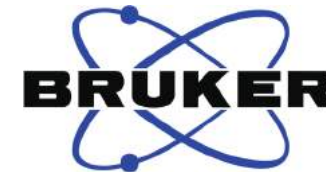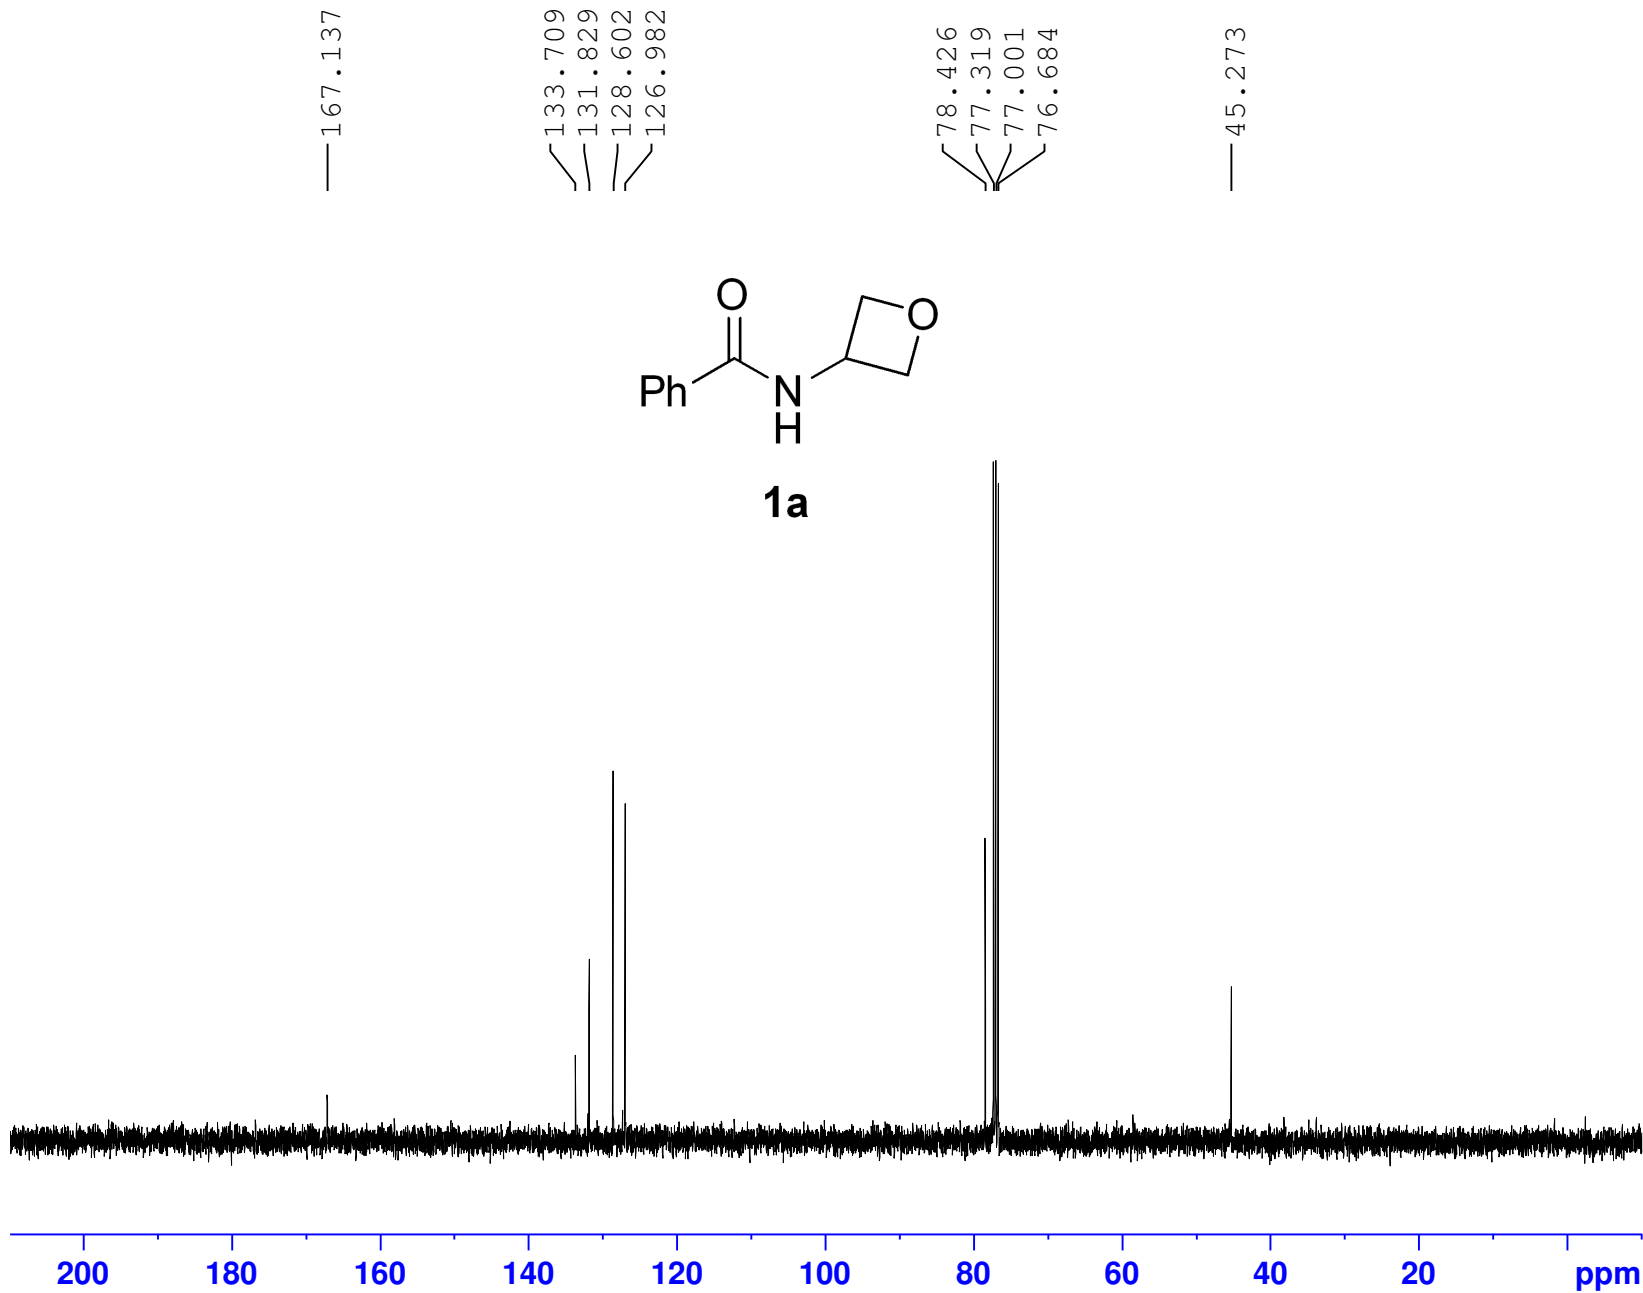

Current Data Parameters  
NAME YW-1543-carbon  
EXPNO 1  
PROCNO 1

F2 - Acquisition Parameters  
Date\_ 20160120  
Time 20.08  
INSTRUM spect  
PROBHD 5 mm PABBO BB/  
PULPROG zgpg30  
TD 65536  
SOLVENT CDC13  
NS 28  
DS 0  
SWH 24038.461 Hz  
FIDRES 0.366798 Hz  
AQ 1.3631488 sec  
RG 196.92  
DW 20.800 usec  
DE 6.50 usec  
TE 302.2 K  
D1 2.00000000 sec  
D11 0.03000000 sec  
TD0 1

==== CHANNEL f1 =====  
SFO1 100.6228298 MHz  
NUC1 13C  
P1 9.70 usec  
PLW1 46.98899841 W

==== CHANNEL f2 =====  
SFO2 400.1316005 MHz  
NUC2 1H  
CPDPRG[2] waltz16  
PCPD2 90.00 usec  
PLW2 11.99499989 W  
PLW12 0.34213999 W  
PLW13 0.27713001 W

F2 - Processing parameters  
SI 32768  
SF 100.6127736 MHz  
WDW EM  
SSB 0  
LB 1.00 Hz  
GB 0  
PC 1.40



9.137  
7.997  
7.976  
7.797  
7.776  
7.743  
7.725  
7.513  
7.495  
7.475  
7.430  
7.427  
7.424  
7.414  
7.409  
7.404  
7.394  
7.391  
7.388  
5.082  
5.066  
5.047  
5.031  
5.012  
4.996  
4.805  
4.788  
4.786  
4.770  
4.639  
4.623  
4.607  
3.340  
2.509  
2.505  
2.500  
2.496  
2.491

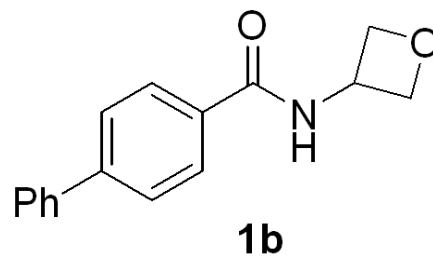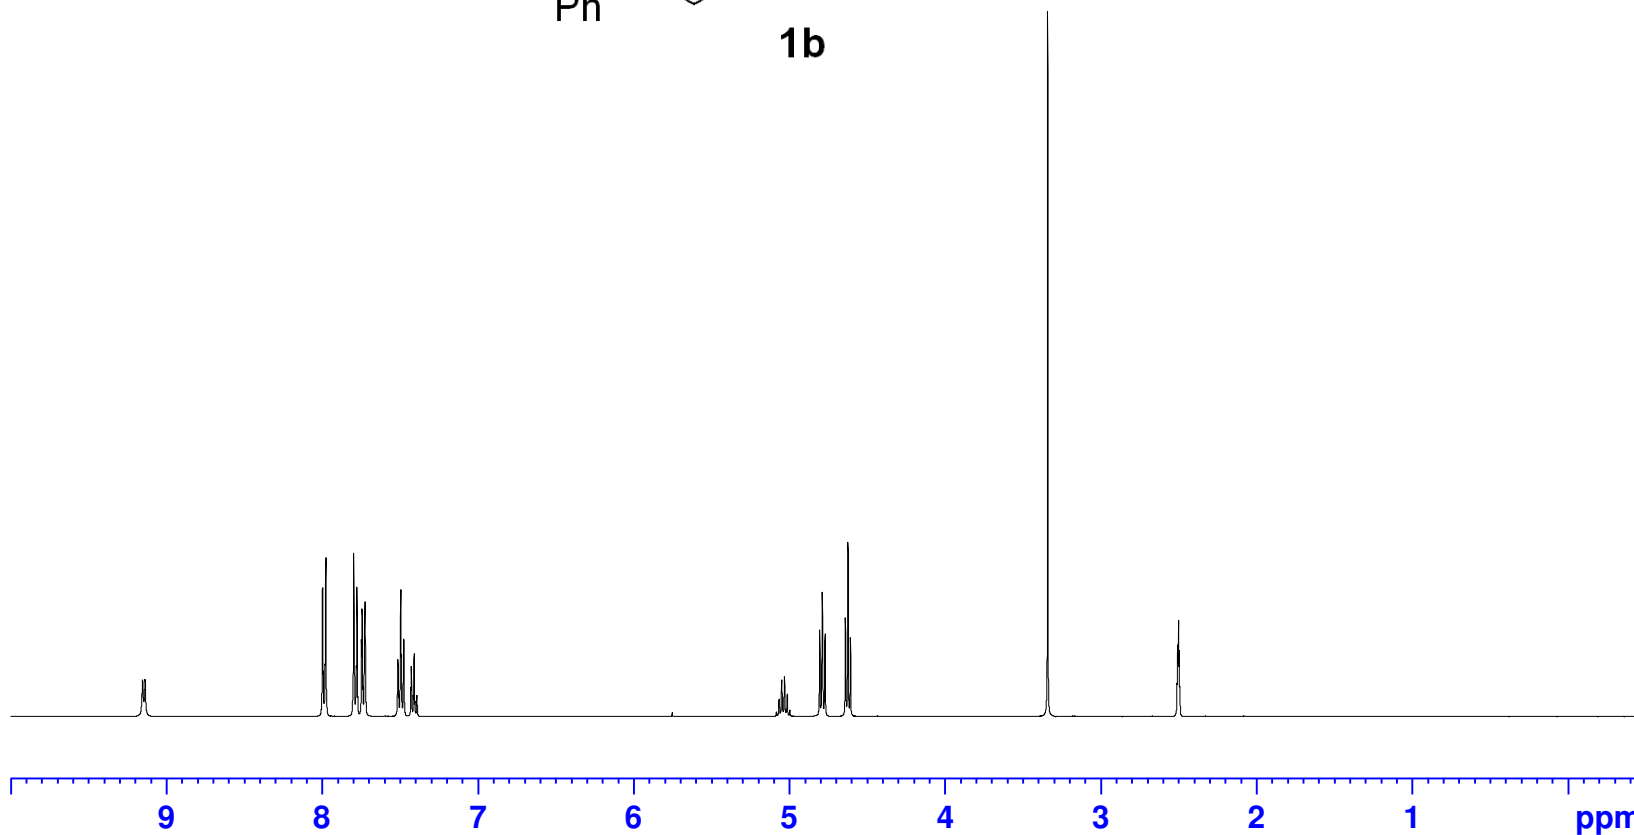

Current Data Parameters  
NAME YW-1724  
EXPNO 1  
PROCNO 1

F2 - Acquisition Parameters  
Date\_ 20160812  
Time 22.20  
INSTRUM spect  
PROBHD 5 mm PABBO BB/  
PULPROG zg30  
TD 65536  
SOLVENT DMSO  
NS 6  
DS 0  
SWH 8012.820 Hz  
FIDRES 0.122266 Hz  
AQ 4.0894465 sec  
RG 112.31  
DW 62.400 usec  
DE 6.50 usec  
TE 299.7 K  
D1 1.00000000 sec  
TD0 1

==== CHANNEL f1 =====  
SFO1 400.1324710 MHz  
NUC1 1H  
P1 14.50 usec  
PLW1 11.99499989 W

F2 - Processing parameters  
SI 65536  
SF 400.1300027 MHz  
WDW EM  
SSB 0  
LB 0.30 Hz  
GB 0  
PC 1.00

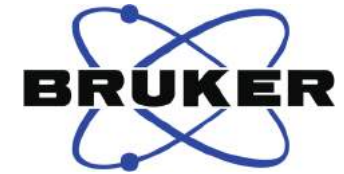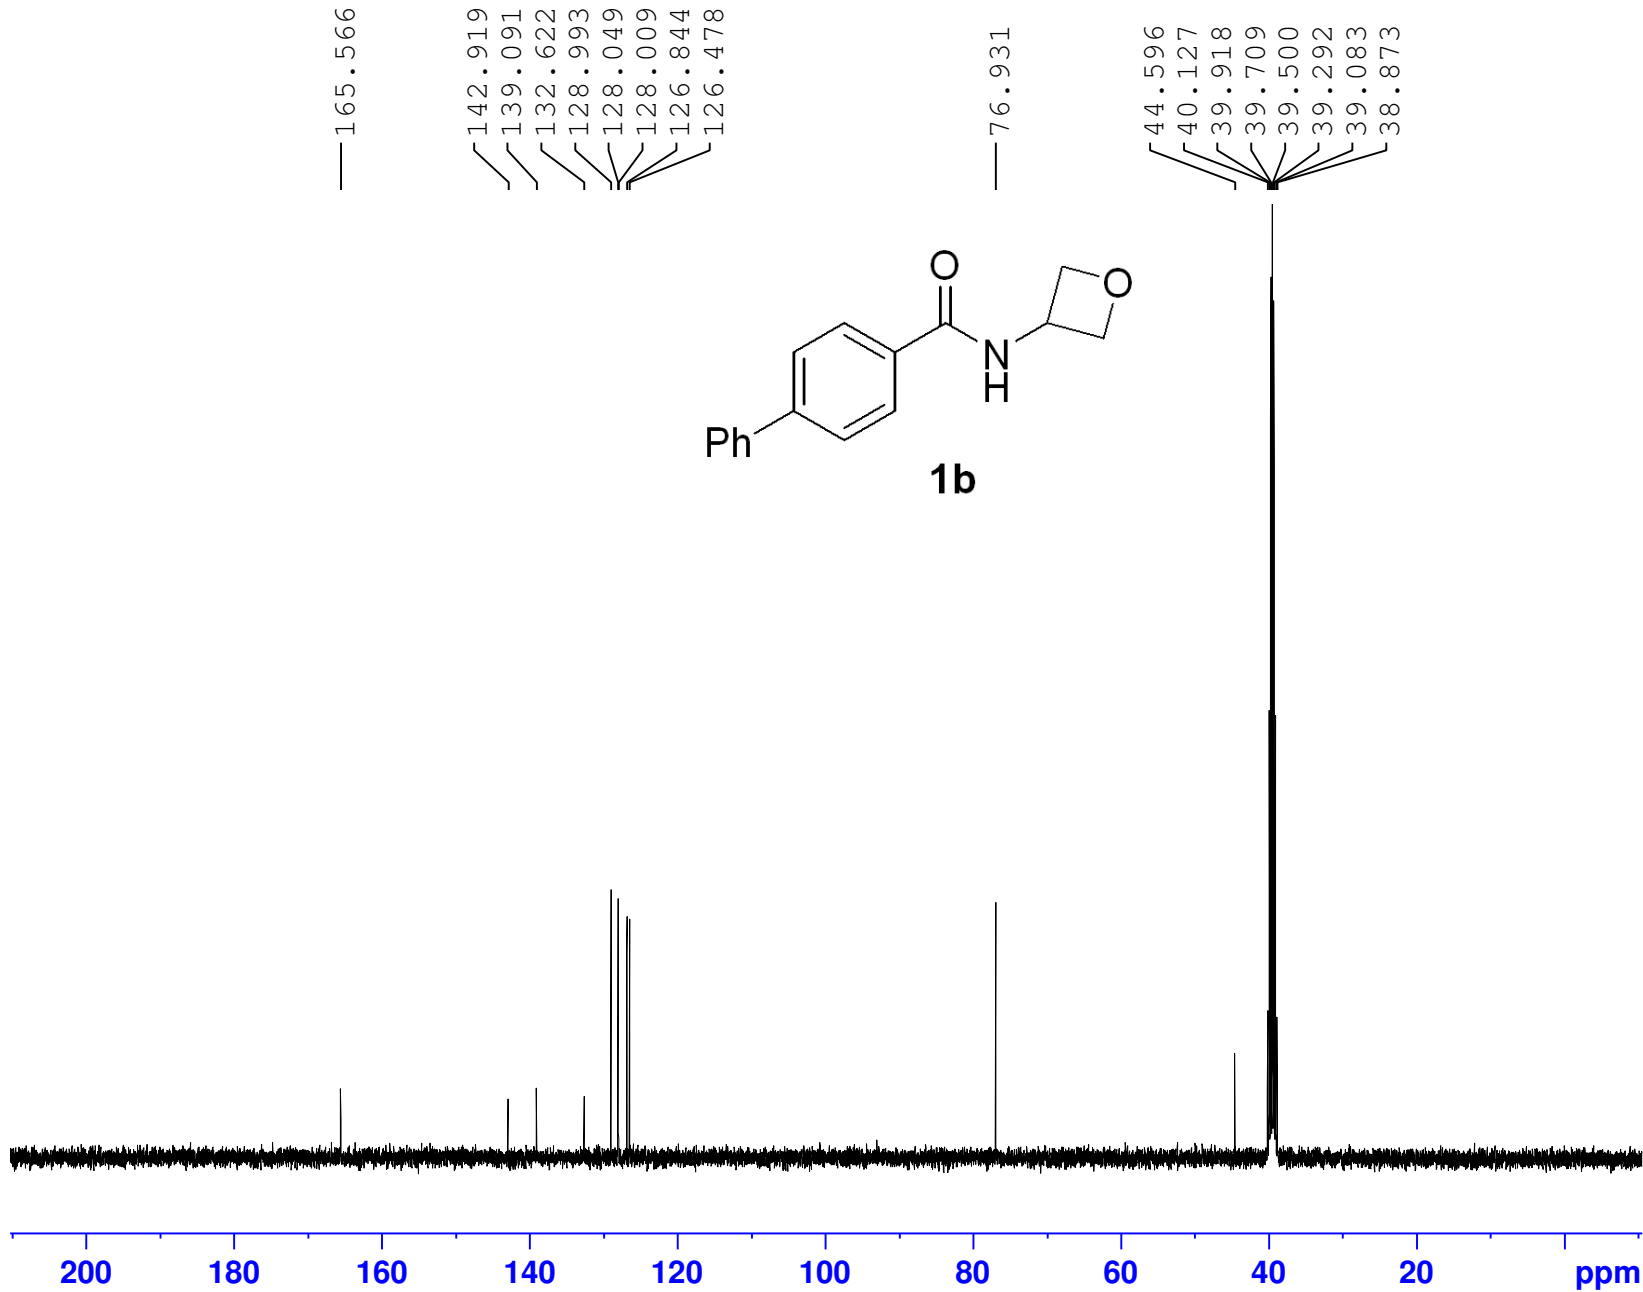

Current Data Parameters  
NAME YW-1724-carbon  
EXPNO 1  
PROCNO 1

F2 - Acquisition Parameters  
Date\_ 20160812  
Time 22.25  
INSTRUM spect  
PROBHD 5 mm PABBO BB/  
PULPROG zgpg30  
TD 65536  
SOLVENT DMSO  
NS 82  
DS 0  
SWH 24038.461 Hz  
FIDRES 0.366798 Hz  
AQ 1.3631488 sec  
RG 196.92  
DW 20.800 usec  
DE 6.50 usec  
TE 300.7 K  
D1 2.00000000 sec  
D11 0.03000000 sec  
TD0 1

==== CHANNEL f1 =====  
SFO1 100.6228298 MHz  
NUC1 13C  
P1 9.70 usec  
PLW1 46.98899841 W

==== CHANNEL f2 =====  
SFO2 400.1316005 MHz  
NUC2 1H  
CPDPRG[2] waltz16  
PCPD2 90.00 usec  
PLW2 11.99499989 W  
PLW12 0.34213999 W  
PLW13 0.27713001 W

F2 - Processing parameters  
SI 32768  
SF 100.6128192 MHz  
WDW EM  
SSB 0  
LB 1.00 Hz  
GB 0  
PC 1.40





7.735  
7.715  
7.410  
7.390  
7.262  
7.011

5.235  
5.219  
5.202  
5.186  
5.018  
5.001  
4.983  
4.618  
4.603  
4.587

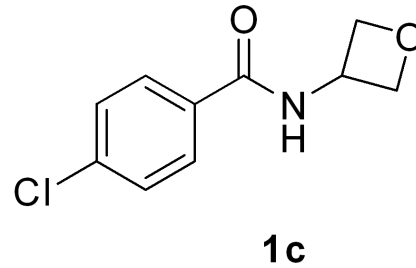

Current Data Parameters  
NAME lzw2079-H  
EXPNO 1  
PROCNO 1

F2 - Acquisition Parameters  
Date\_ 20150319  
Time 15.26  
INSTRUM spect  
PROBHD 5 mm PABBO BB/  
PULPROG zg30  
TD 65536  
SOLVENT CDC13  
NS 9  
DS 2  
SWH 8012.820 Hz  
FIDRES 0.122266 Hz  
AQ 4.0894465 sec  
RG 103.52  
DW 62.400 usec  
DE 6.50 usec  
TE 295.9 K  
D1 1.00000000 sec  
TD0 1

==== CHANNEL f1 =====  
SFO1 400.1324710 MHz  
NUC1 1H  
P1 14.50 usec  
PLW1 11.99499989 W

F2 - Processing parameters  
SI 65536  
SF 400.1300082 MHz  
WDW EM  
SSB 0  
LB 0.30 Hz  
GB 0  
PC 1.00

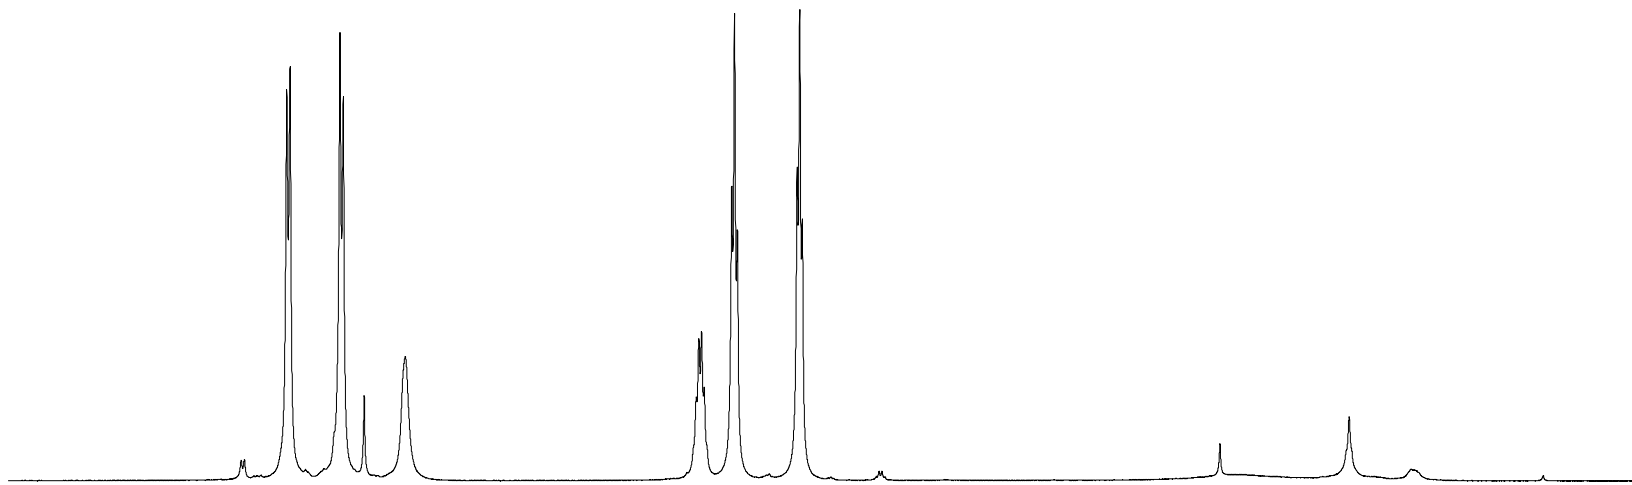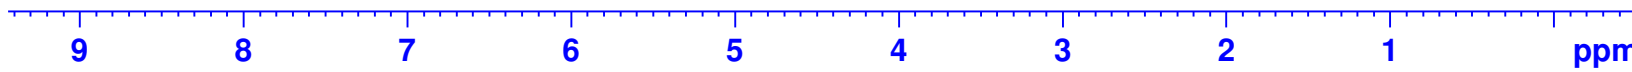

1.91  
2.02  
0.95  
1.00  
1.96  
1.98

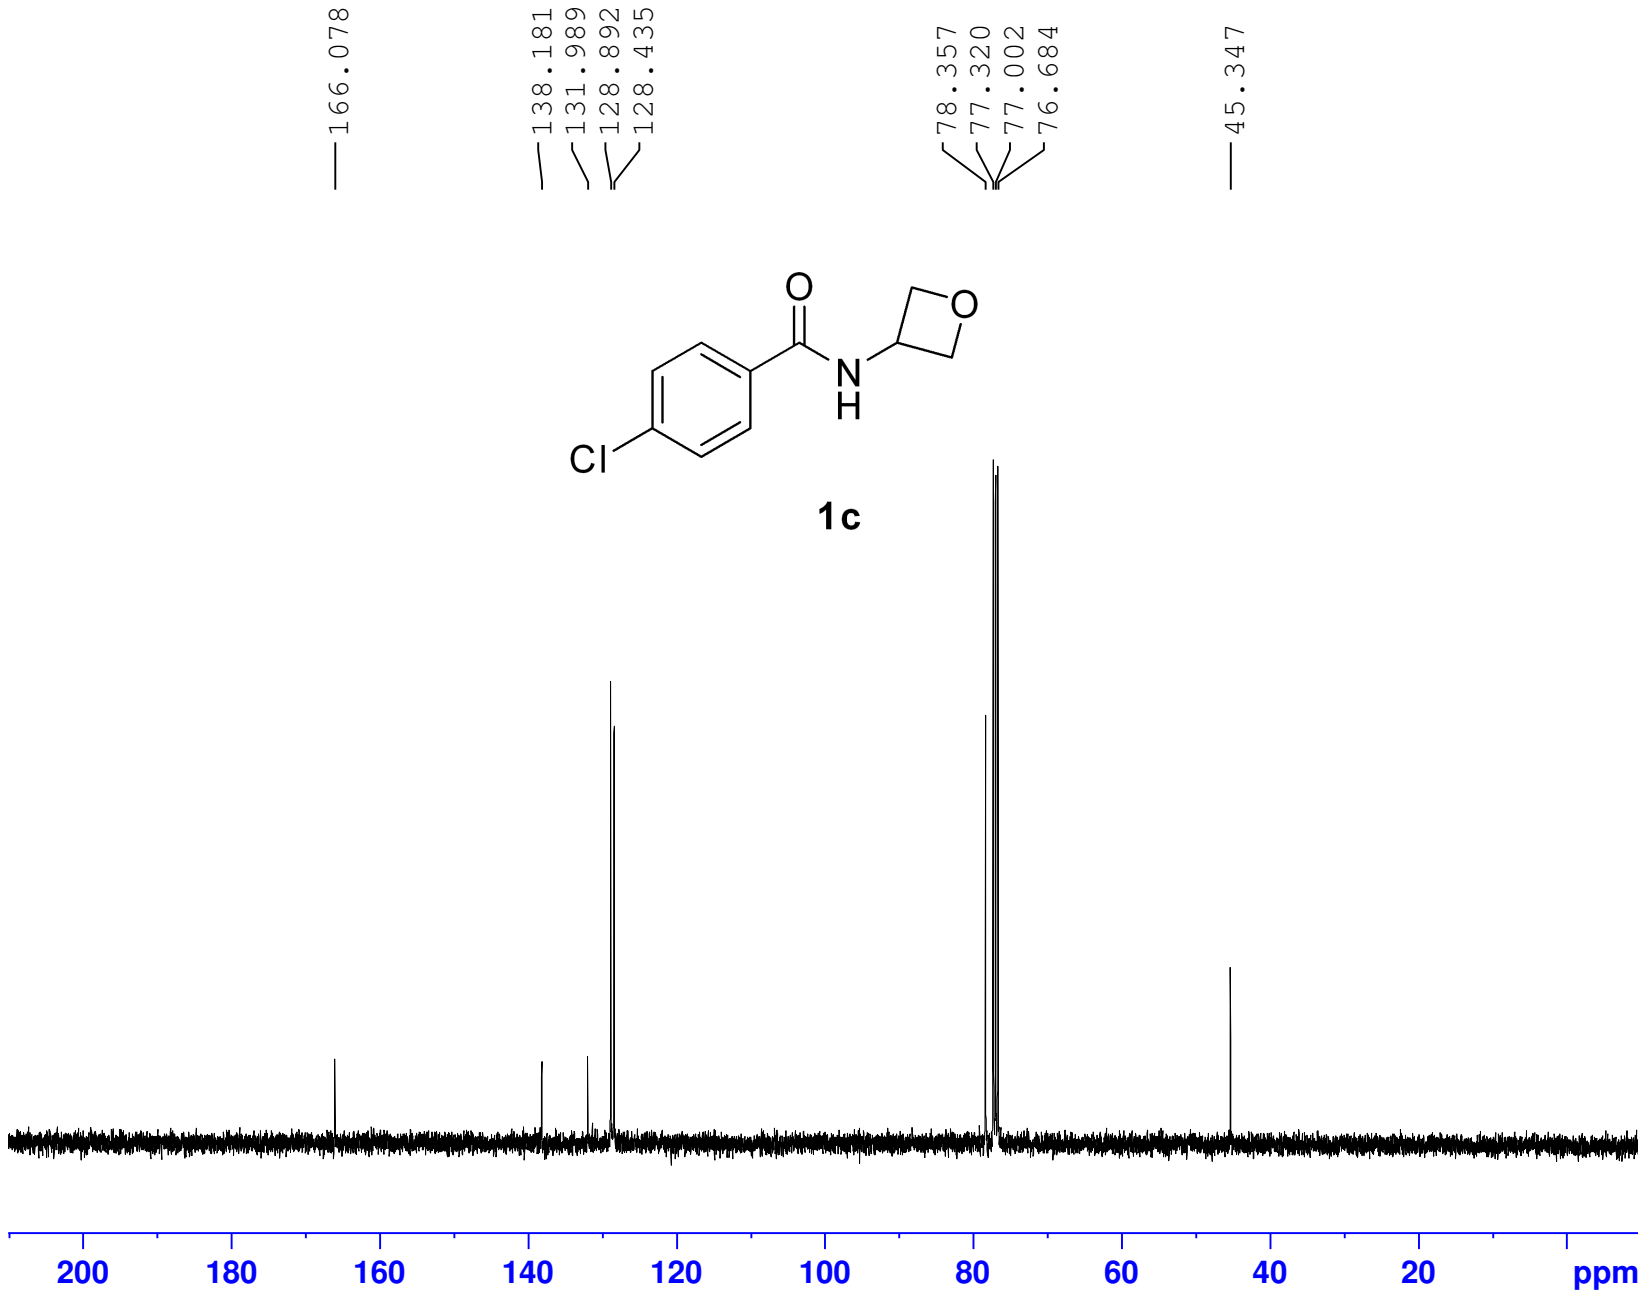

Current Data Parameters  
NAME lzw2079-C  
EXPNO 1  
PROCNO 1

F2 - Acquisition Parameters  
Date\_ 20150319  
Time 15.32  
INSTRUM spect  
PROBHD 5 mm PABBO BB/  
PULPROG zgpg30  
TD 65536  
SOLVENT CDC13  
NS 82  
DS 2  
SWH 24038.461 Hz  
FIDRES 0.366798 Hz  
AQ 1.3631488 sec  
RG 196.92  
DW 20.800 usec  
DE 6.50 usec  
TE 297.0 K  
D1 2.00000000 sec  
D11 0.03000000 sec  
TD0 1

==== CHANNEL f1 =====  
SFO1 100.6228298 MHz  
NUC1 13C  
P1 9.70 usec  
PLW1 46.98899841 W

==== CHANNEL f2 =====  
SFO2 400.1316005 MHz  
NUC2 1H  
CPDPRG[2] waltz16  
PCPD2 90.00 usec  
PLW2 11.99499989 W  
PLW12 0.34213999 W  
PLW13 0.27713001 W

F2 - Processing parameters  
SI 32768  
SF 100.6127737 MHz  
WDW EM  
SSB 0  
LB 1.00 Hz  
GB 0  
PC 1.40

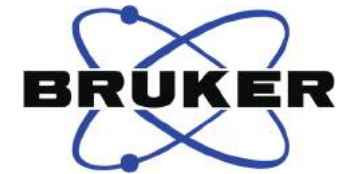

Current Data Parameters  
NAME YW-(LZW2068B)  
EXPNO 1  
PROCNO 1

F2 - Acquisition Parameters  
Date\_ 20160813  
Time 9.39  
INSTRUM spect  
PROBHD 5 mm PABBO BB/  
PULPROG zg30  
TD 65536  
SOLVENT Acetone  
NS 16  
DS 0  
SWH 8012.820 Hz  
FIDRES 0.122266 Hz  
AQ 4.0894465 sec  
RG 112.31  
DW 62.400 usec  
DE 6.50 usec  
TE 300.4 K  
D1 1.00000000 sec  
TD0 1

==== CHANNEL f1 =====  
SFO1 400.1324710 MHz  
NUC1 1H  
P1 14.50 usec  
PLW1 11.99499989 W

F2 - Processing parameters  
SI 65536  
SF 400.1300067 MHz  
WDW EM  
SSB 0  
LB 0.30 Hz  
GB 0  
PC 1.00

8.590  
8.100  
8.096  
8.091  
8.079  
8.074  
8.071  
7.907  
7.903  
7.898  
7.887  
7.882  
7.878

5.206  
5.190  
5.171  
5.155  
5.136  
5.120  
4.868  
4.851  
4.833  
4.662  
4.645  
4.629

— 2.860  
2.061  
2.056  
2.050  
2.045  
2.039

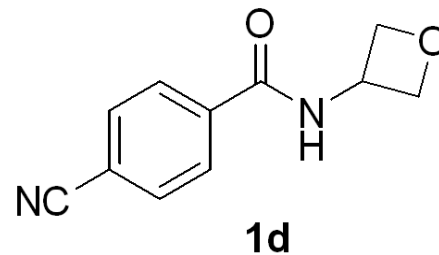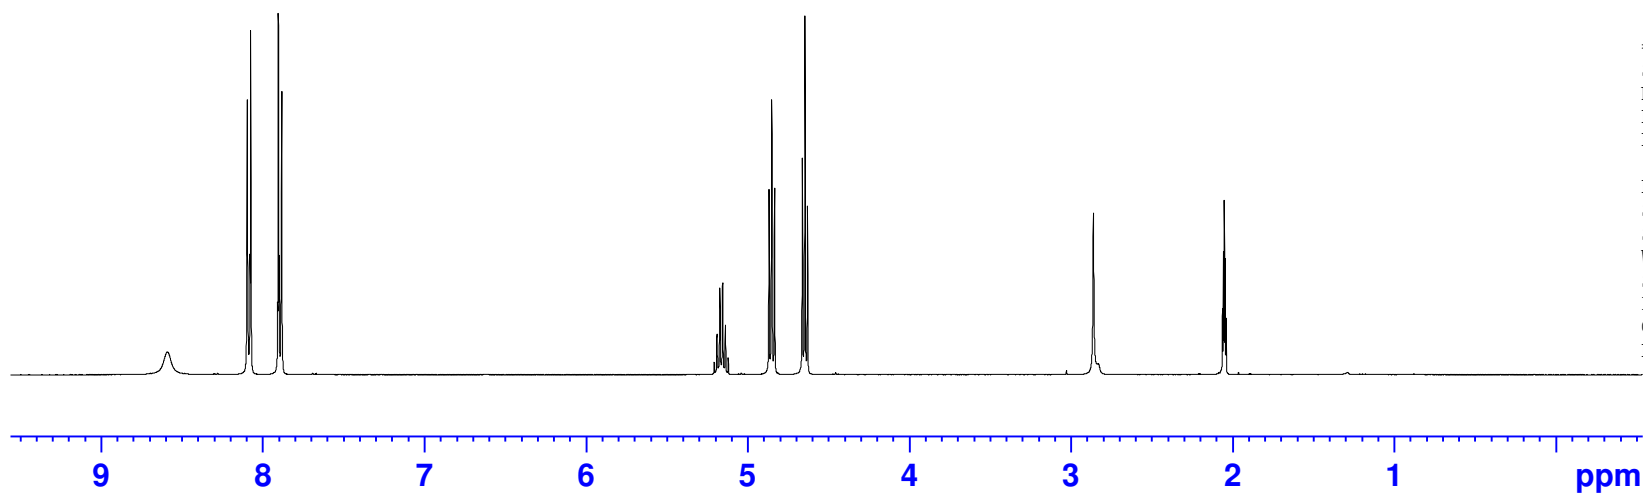

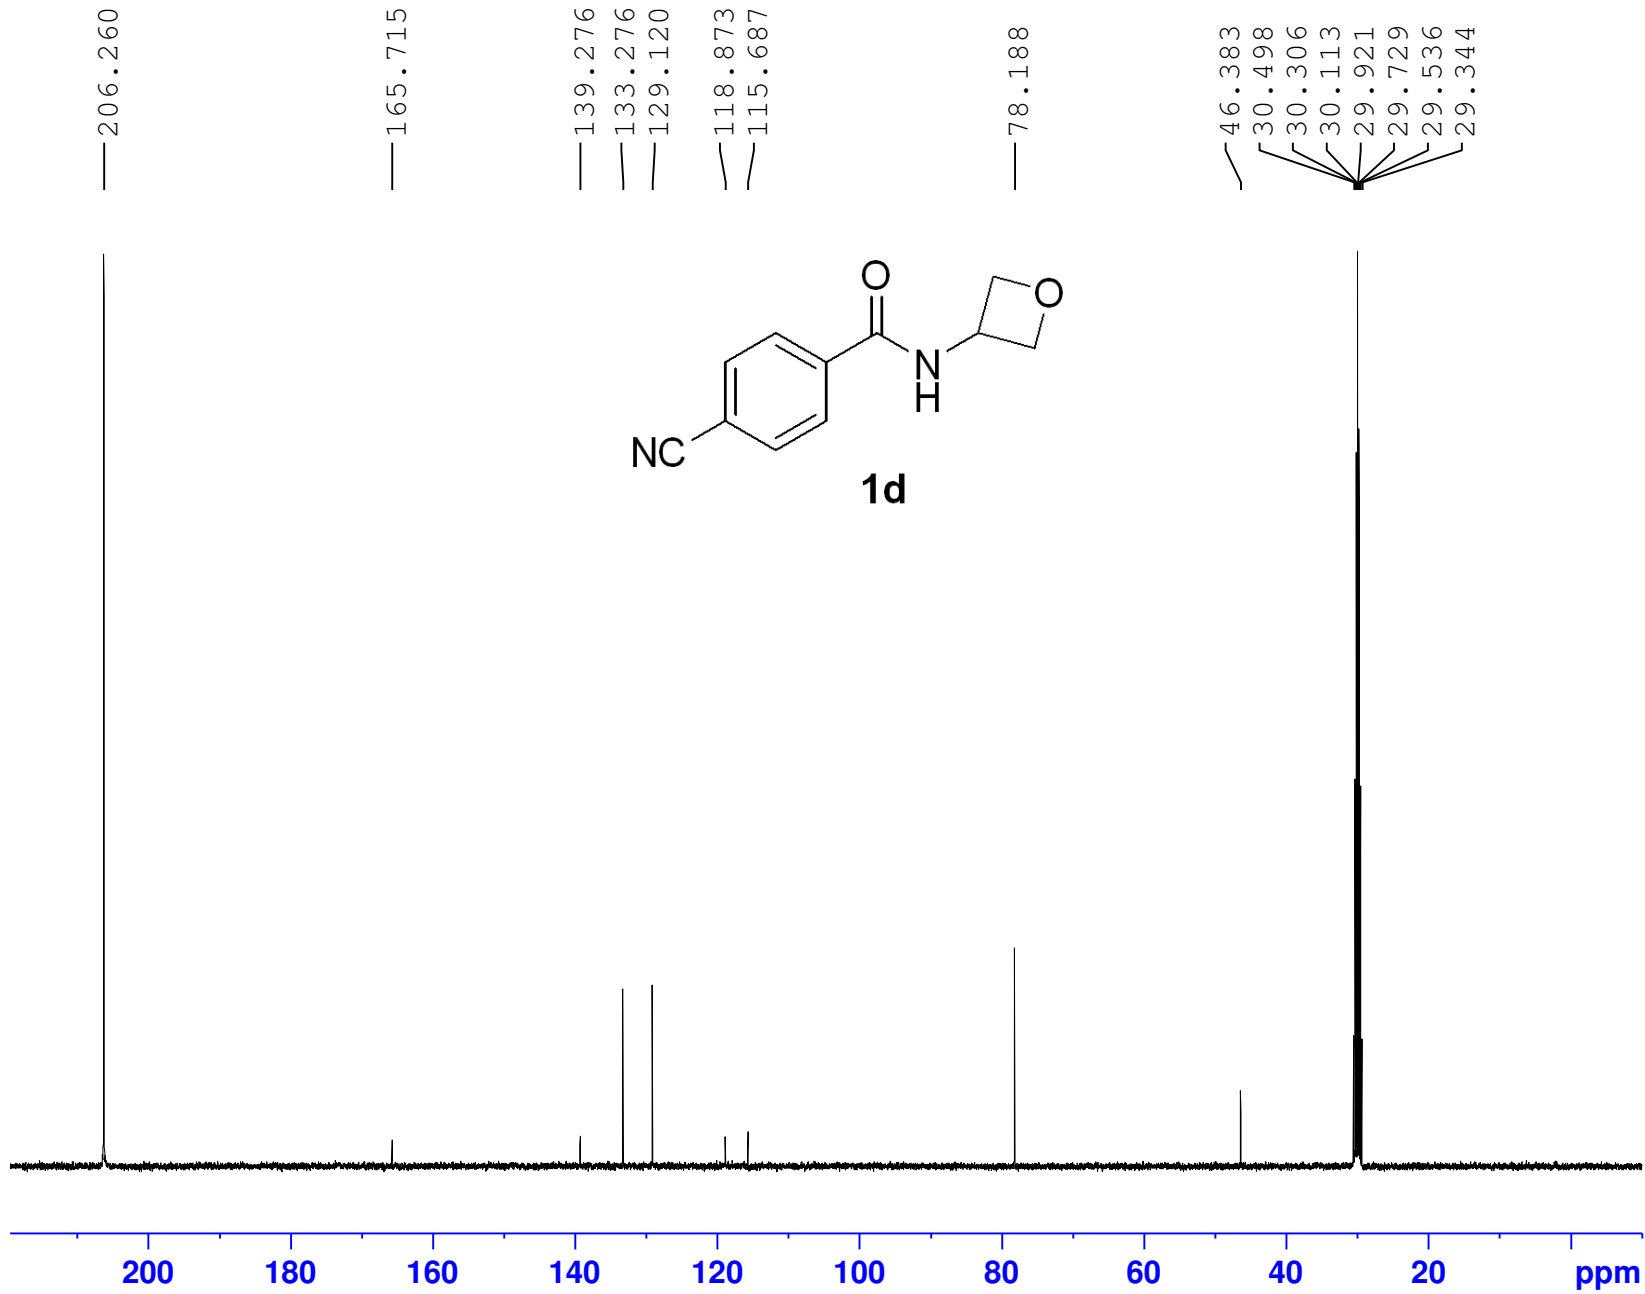

Current Data Parameters  
NAME YW-(LZW2068B)-carbon  
EXPNO 1  
PROCNO 1

F2 - Acquisition Parameters  
Date\_ 20160813  
Time 9.47  
INSTRUM spect  
PROBHD 5 mm PABBO BB/  
PULPROG zgpg30  
TD 65536  
SOLVENT Acetone  
NS 129  
DS 0  
SWH 24038.461 Hz  
FIDRES 0.366798 Hz  
AQ 1.3631488 sec  
RG 196.92  
DW 20.800 usec  
DE 6.50 usec  
TE 301.2 K  
D1 2.00000000 sec  
D11 0.03000000 sec  
TD0 1

==== CHANNEL f1 =====  
SFO1 100.6228298 MHz  
NUC1 13C  
P1 9.70 usec  
PLW1 46.98899841 W

==== CHANNEL f2 =====  
SFO2 400.1316005 MHz  
NUC2 1H  
CPDPRG[2] waltz16  
PCPD2 90.00 usec  
PLW2 11.99499989 W  
PLW12 0.34213999 W  
PLW13 0.27713001 W

F2 - Processing parameters  
SI 32768  
SF 100.6126695 MHz  
WDW EM  
SSB 0  
LB 1.00 Hz  
GB 0  
PC 1.40



8.685  
8.322  
8.317  
8.304  
8.300  
8.161  
8.156  
8.143  
8.139

5.218  
5.202  
5.184  
5.167  
5.149  
5.132  
4.877  
4.860  
4.842  
4.675  
4.659  
4.642

2.921  
2.061  
2.055  
2.050  
2.045  
2.039

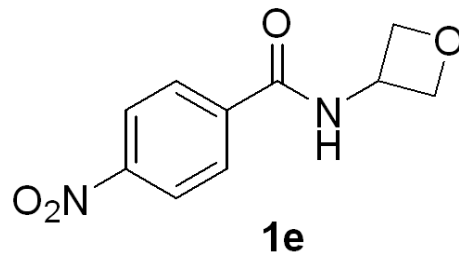

Current Data Parameters  
NAME YW-(LZW2068A)  
EXPNO 1  
PROCNO 1

F2 - Acquisition Parameters  
Date\_ 20160813  
Time 9.50  
INSTRUM spect  
PROBHD 5 mm PABBO BB/  
PULPROG zg30  
TD 65536  
SOLVENT Acetone  
NS 5  
DS 0  
SWH 8012.820 Hz  
FIDRES 0.122266 Hz  
AQ 4.0894465 sec  
RG 62.93  
DW 62.400 usec  
DE 6.50 usec  
TE 300.3 K  
D1 1.00000000 sec  
TD0 1

==== CHANNEL f1 =====  
SFO1 400.1324710 MHz  
NUC1 1H  
P1 14.50 usec  
PLW1 11.99499989 W

F2 - Processing parameters  
SI 65536  
SF 400.1300065 MHz  
WDW EM  
SSB 0  
LB 0.30 Hz  
GB 0  
PC 1.00

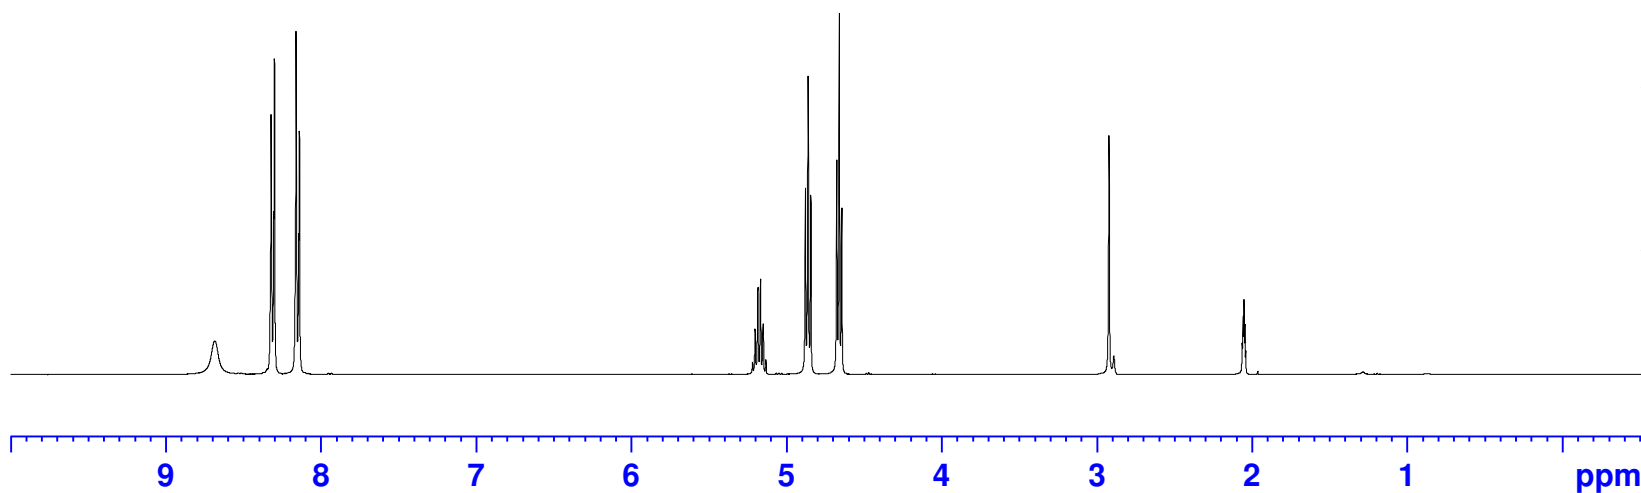

0.98  
2.00  
2.04

1.00  
2.10  
2.10

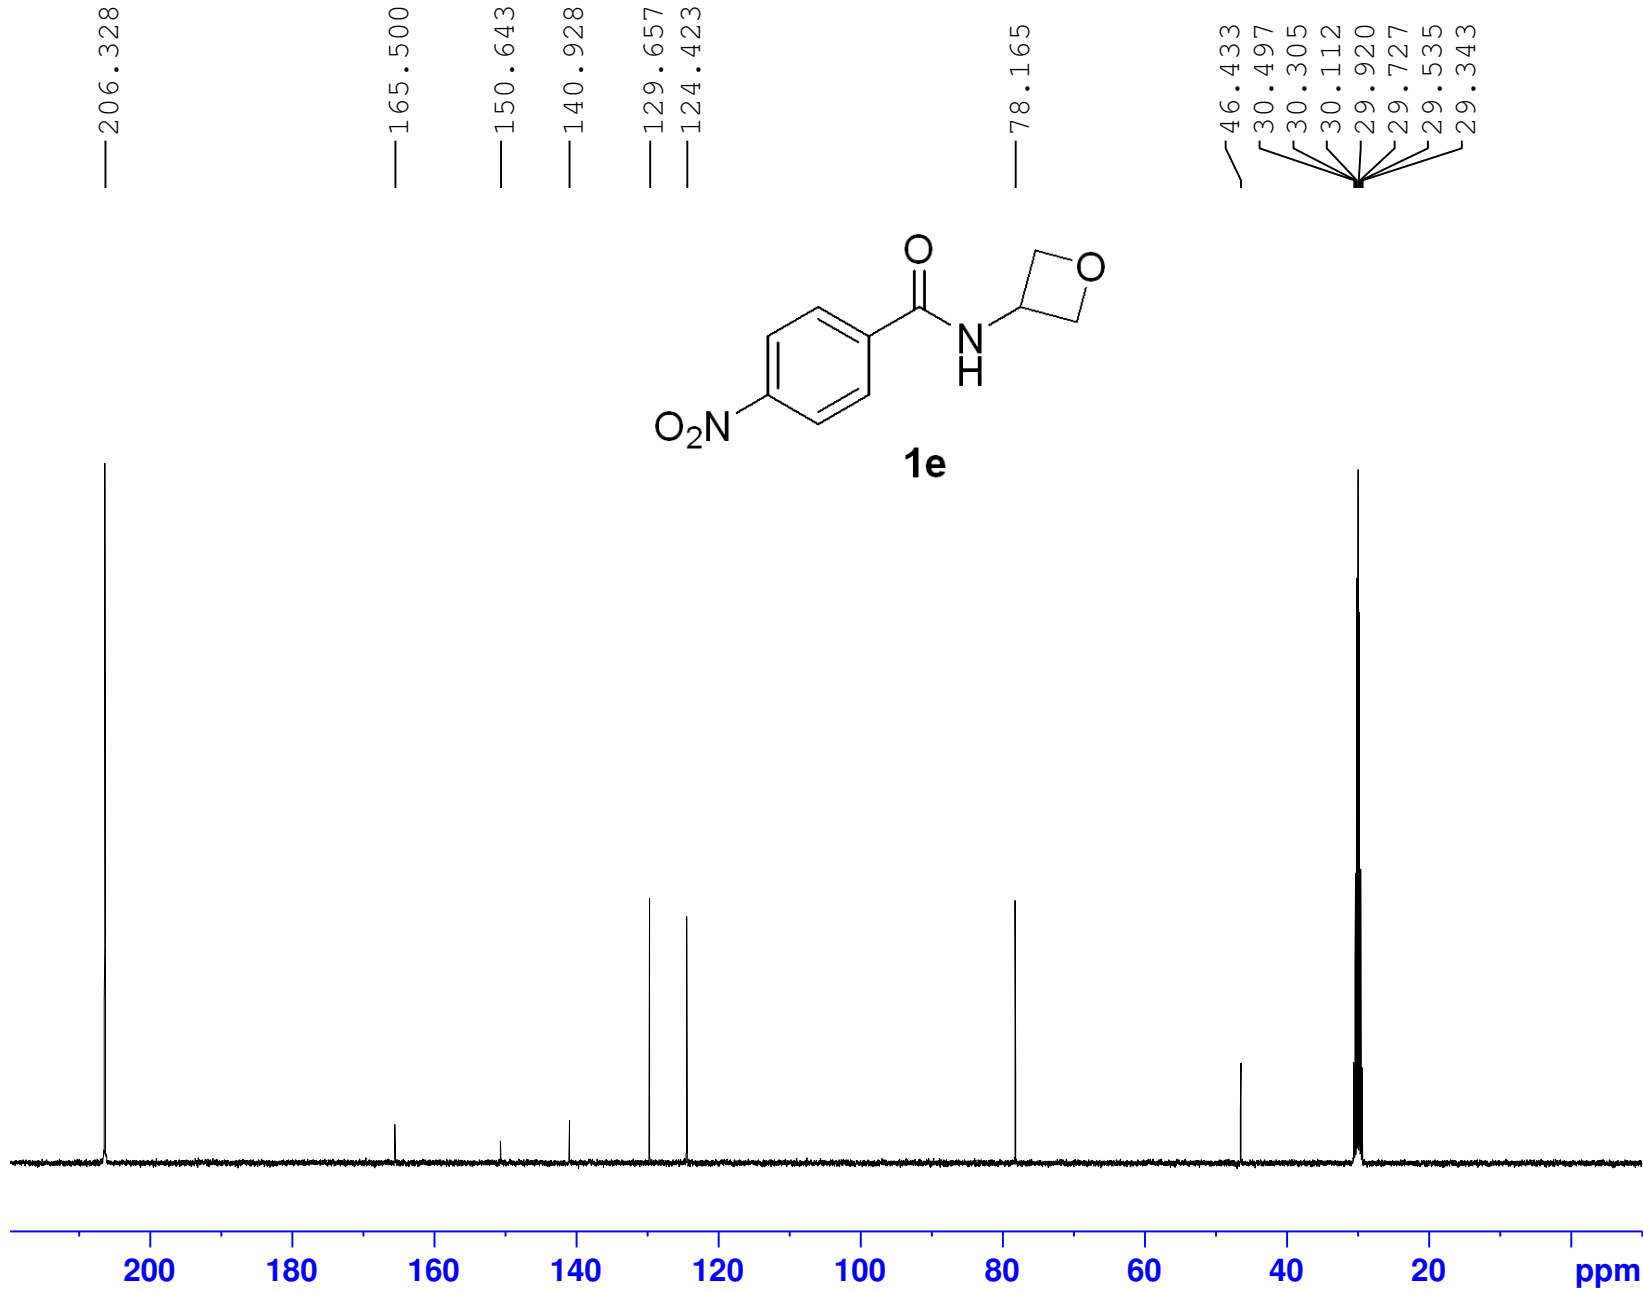

Current Data Parameters  
NAME YW-(LZW2068A)-carbon  
EXPNO 1  
PROCNO 1

F2 - Acquisition Parameters  
Date\_ 20160813  
Time 9.59  
INSTRUM spect  
PROBHD 5 mm PABBO BB/  
PULPROG zgpg30  
TD 65536  
SOLVENT Acetone  
NS 137  
DS 0  
SWH 24038.461 Hz  
FIDRES 0.366798 Hz  
AQ 1.3631488 sec  
RG 196.92  
DW 20.800 usec  
DE 6.50 usec  
TE 300.9 K  
D1 2.00000000 sec  
D11 0.03000000 sec  
TD0 1

==== CHANNEL f1 =====  
SFO1 100.6228298 MHz  
NUC1 13C  
P1 9.70 usec  
PLW1 46.98899841 W

==== CHANNEL f2 =====  
SFO2 400.1316005 MHz  
NUC2 1H  
CPDPRG[2] waltz16  
PCPD2 90.00 usec  
PLW2 11.99499989 W  
PLW12 0.34213999 W  
PLW13 0.27713001 W

F2 - Processing parameters  
SI 32768  
SF 100.6126702 MHz  
WDW EM  
SSB 0  
LB 1.00 Hz  
GB 0  
PC 1.40

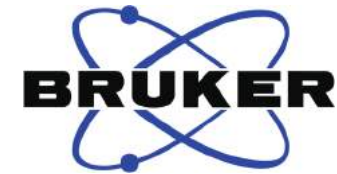

7.363  
7.344  
7.326  
7.308  
7.259  
7.230  
7.221  
7.211  
7.202  
7.183  
6.458  
5.235  
5.220  
5.217  
5.202  
5.183  
5.168  
5.150  
5.003  
4.985  
4.968  
4.564  
4.548  
4.532

— 2.422

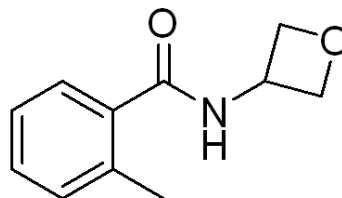

1f

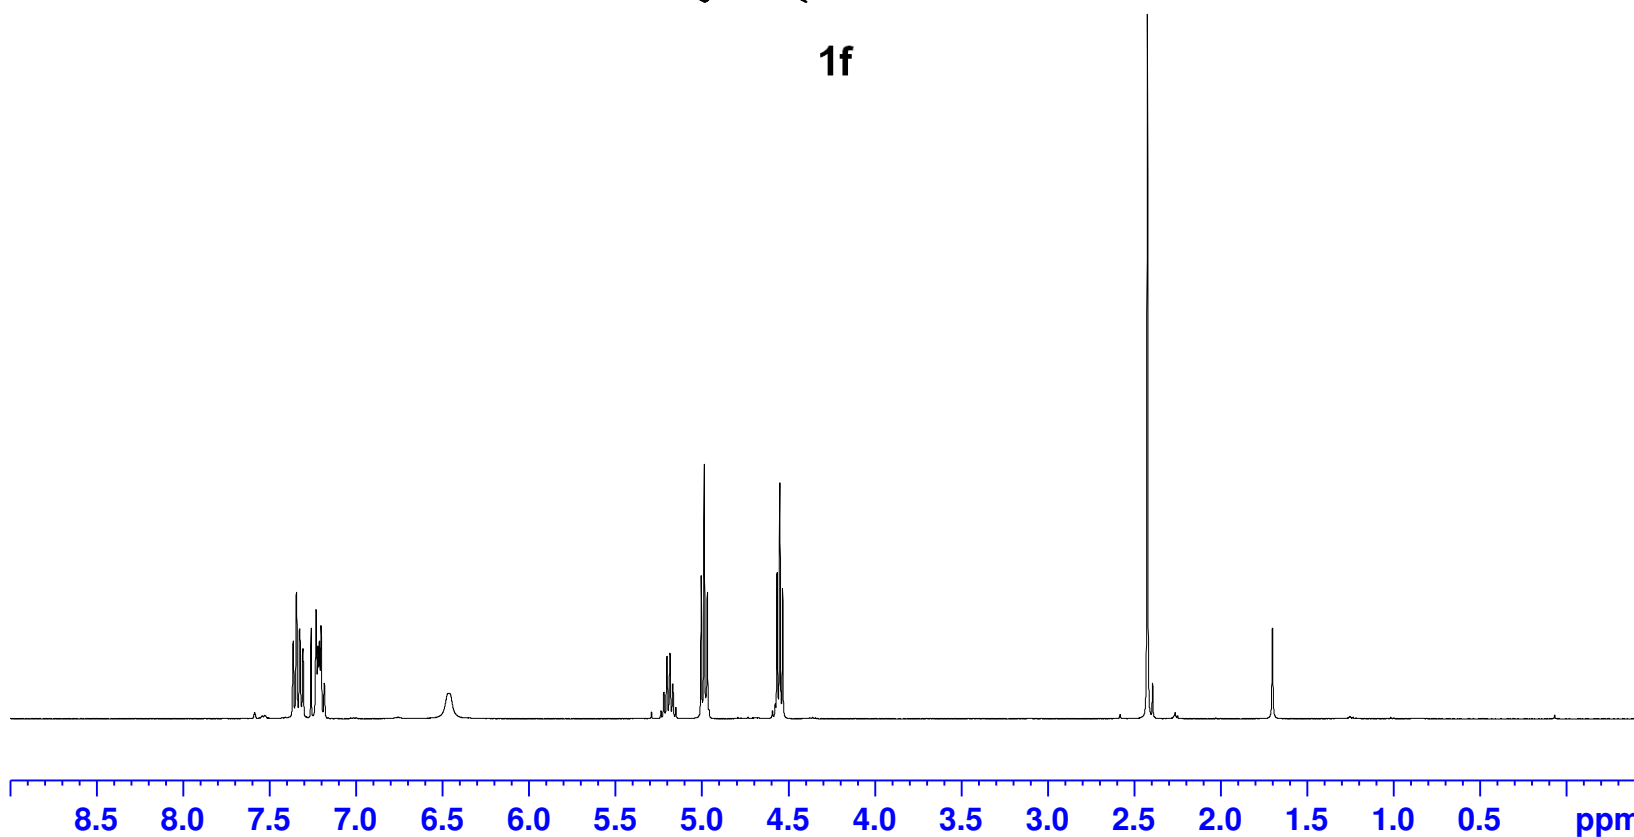

Current Data Parameters  
NAME lzw2058-h  
EXPNO 1  
PROCNO 1

F2 - Acquisition Parameters  
Date\_ 20150310  
Time 20.57  
INSTRUM spect  
PROBHD 5 mm PABBO BB/  
PULPROG zg30  
TD 65536  
SOLVENT CDC13  
NS 5  
DS 2  
SWH 8012.820 Hz  
FIDRES 0.122266 Hz  
AQ 4.0894465 sec  
RG 112.31  
DW 62.400 usec  
DE 6.50 usec  
TE 298.0 K  
D1 1.00000000 sec  
TD0 1

==== CHANNEL f1 =====  
SFO1 400.1324710 MHz  
NUC1 1H  
P1 14.50 usec  
PLW1 11.99499989 W

F2 - Processing parameters  
SI 65536  
SF 400.1300095 MHz  
WDW EM  
SSB 0  
LB 0.30 Hz  
GB 0  
PC 1.00

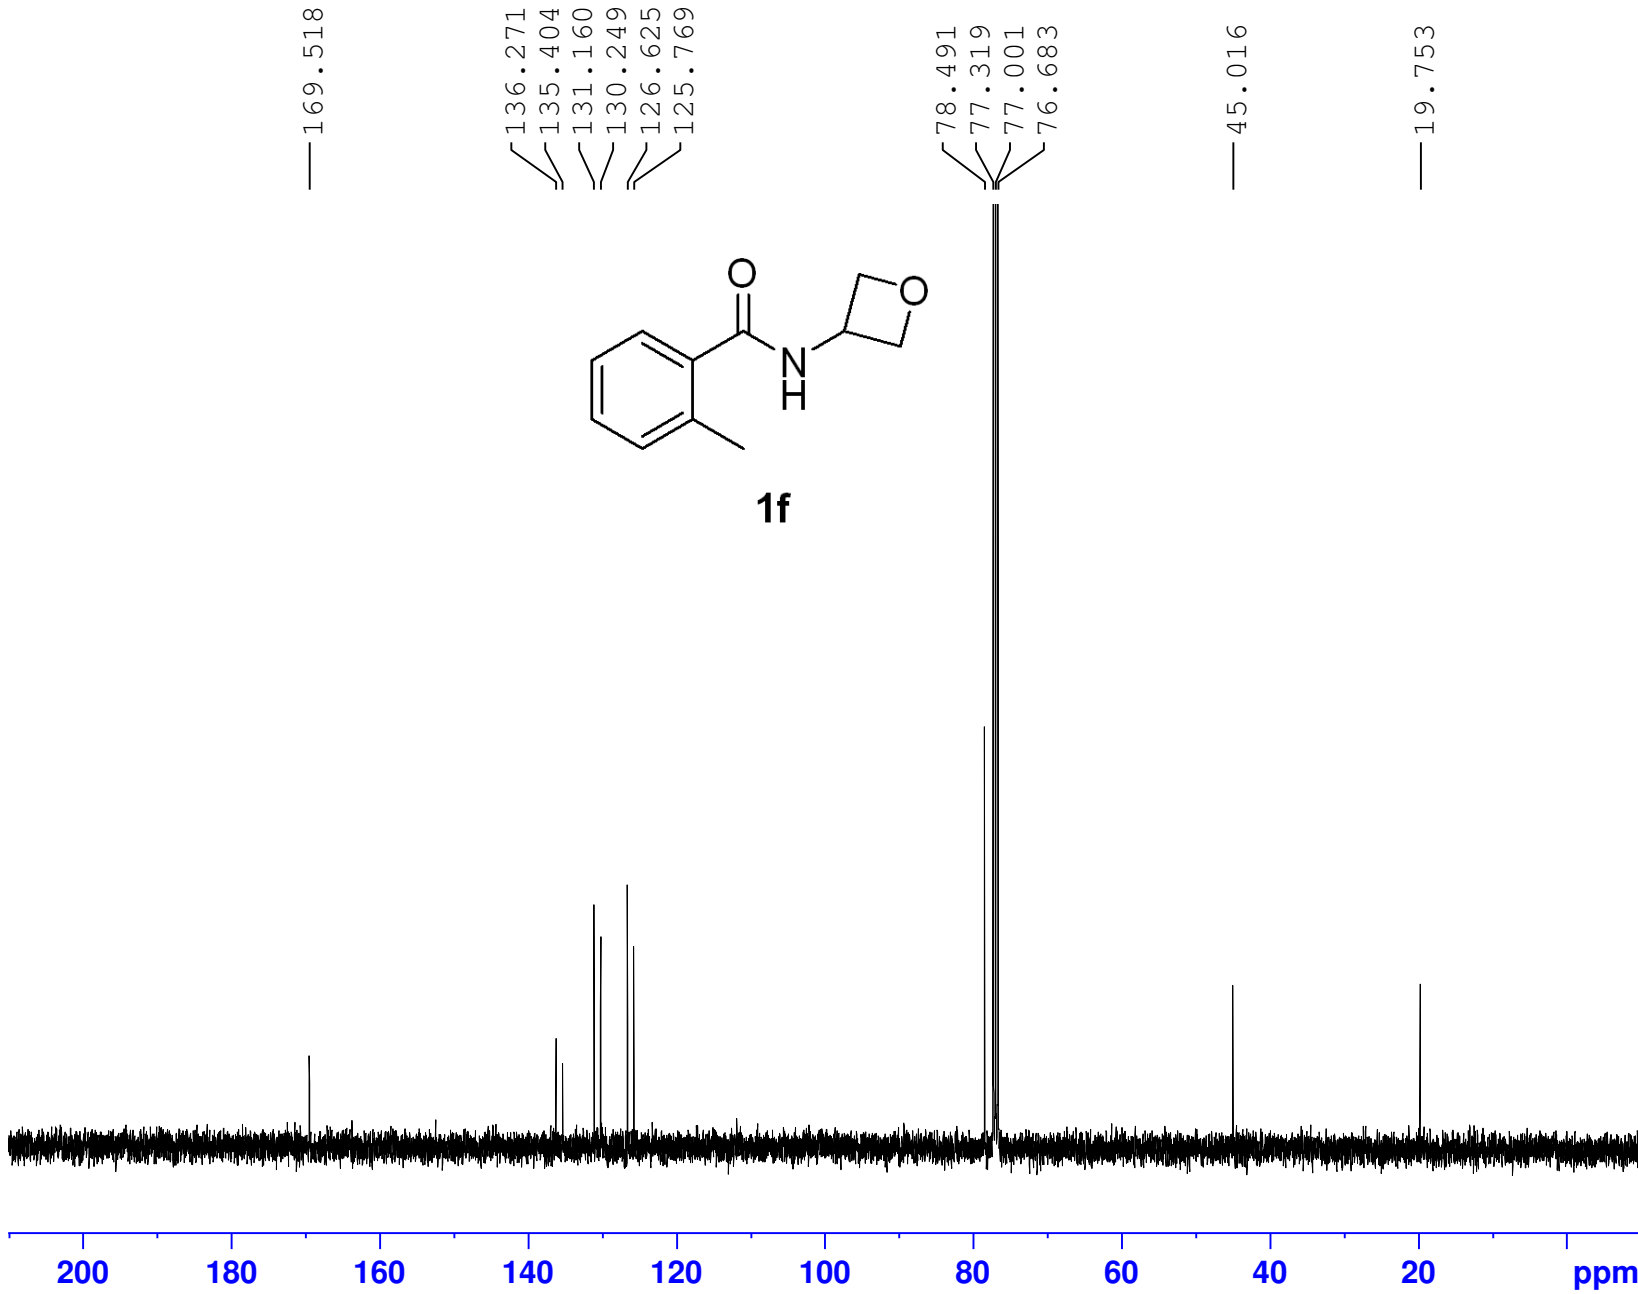

Current Data Parameters  
NAME lzw2058-c  
EXPNO 1  
PROCNO 1

F2 - Acquisition Parameters  
Date\_ 20150310  
Time 21.00  
INSTRUM spect  
PROBHD 5 mm PABBO BB/  
PULPROG zgpg30  
TD 65536  
SOLVENT CDC13  
NS 34  
DS 2  
SWH 24038.461 Hz  
FIDRES 0.366798 Hz  
AQ 1.3631488 sec  
RG 196.92  
DW 20.800 usec  
DE 6.50 usec  
TE 298.7 K  
D1 2.00000000 sec  
D11 0.03000000 sec  
TD0 1

==== CHANNEL f1 =====  
SFO1 100.6228298 MHz  
NUC1 13C  
P1 9.70 usec  
PLW1 46.98899841 W

==== CHANNEL f2 =====  
SFO2 400.1316005 MHz  
NUC2 1H  
CPDPRG[2] waltz16  
PCPD2 90.00 usec  
PLW2 11.99499989 W  
PLW12 0.34213999 W  
PLW13 0.27713001 W

F2 - Processing parameters  
SI 32768  
SF 100.6127729 MHz  
WDW EM  
SSB 0  
LB 1.00 Hz  
GB 0  
PC 1.40





8.156  
8.152  
7.486  
7.481  
7.465  
7.464  
7.447  
7.442  
7.260  
7.096  
7.095  
7.077  
7.058  
7.005  
6.984  
5.280  
5.263  
5.246  
5.228  
5.212  
5.195  
5.024  
5.006  
4.989  
4.621  
4.605  
4.588  
4.002

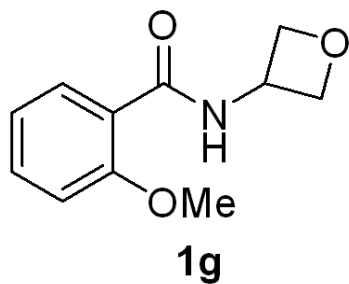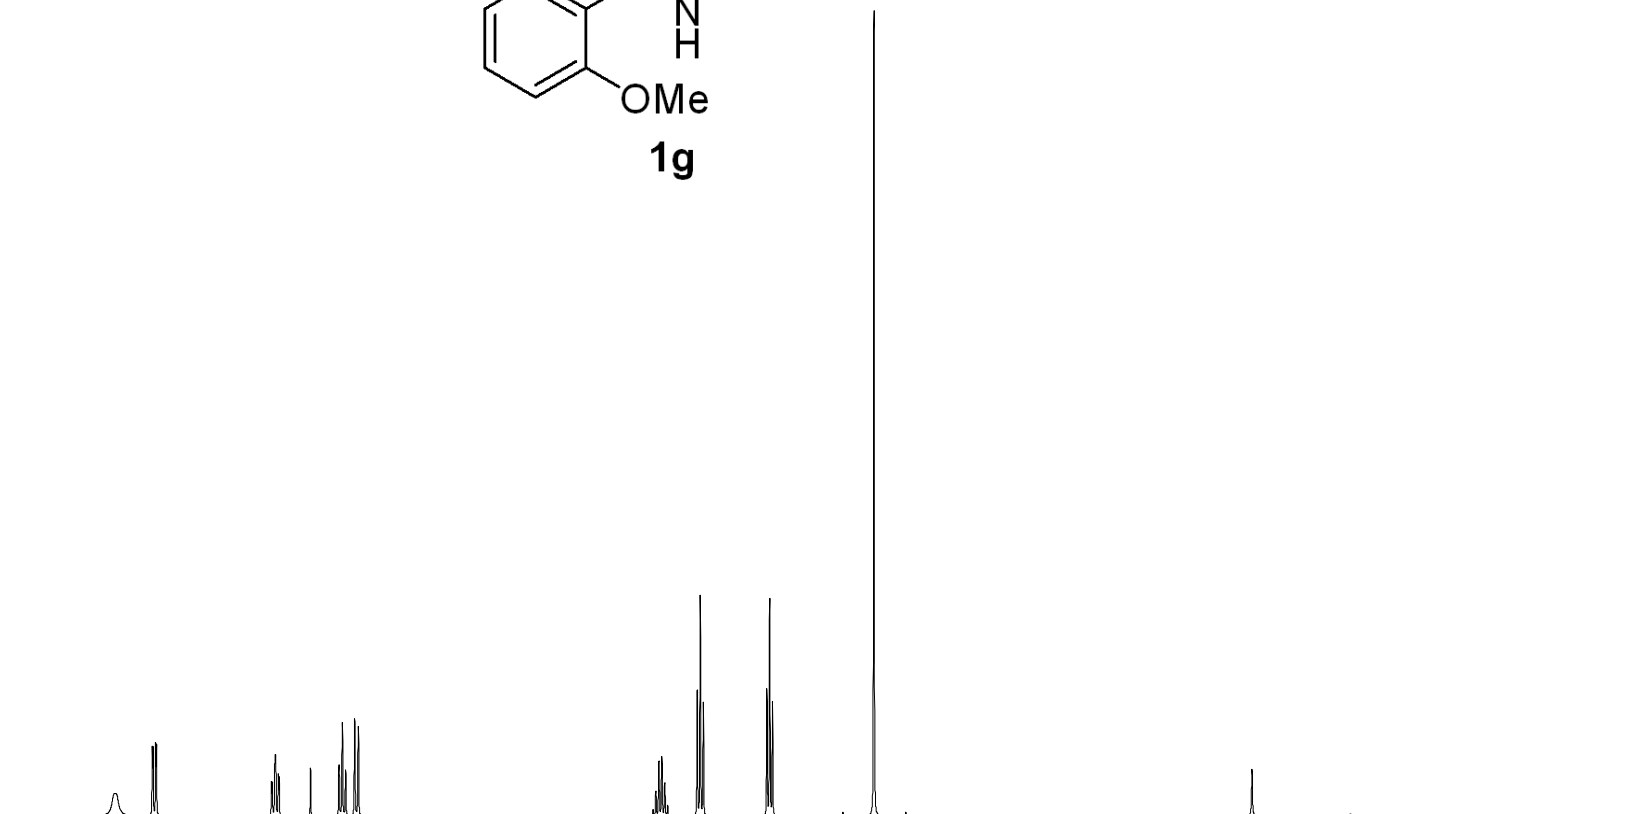

8.5 8.0 7.5 7.0 6.5 6.0 5.5 5.0 4.5 4.0 3.5 3.0 2.5 2.0 1.5 1.0 0.5 ppm

0.96 0.98 0.99 1.00 1.01 1.00 2.05 2.05 3.09

Current Data Parameters  
NAME lzw2052  
EXPNO 1  
PROCNO 1

F2 - Acquisition Parameters  
Date\_ 20150307  
Time 20.55  
INSTRUM spect  
PROBHD 5 mm PABBO BB/  
PULPROG zg30  
TD 65536  
SOLVENT CDC13  
NS 11  
DS 2  
SWH 8012.820 Hz  
FIDRES 0.122266 Hz  
AQ 4.0894465 sec  
RG 82.92  
DW 62.400 usec  
DE 6.50 usec  
TE 297.5 K  
D1 1.00000000 sec  
TD0 1

==== CHANNEL f1 =====  
SFO1 400.1324710 MHz  
NUC1 1H  
P1 14.50 usec  
PLW1 11.99499989 W

F2 - Processing parameters  
SI 65536  
SF 400.1300092 MHz  
WDW EM  
SSB 0  
LB 0.30 Hz  
GB 0  
PC 1.00



— 164.747  
— 157.486  
  
133.158  
132.282  
121.402  
120.640  
— 111.312  
  
78.769  
77.319  
77.001  
76.684  
  
— 55.968  
— 44.899

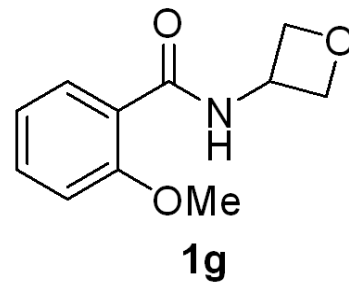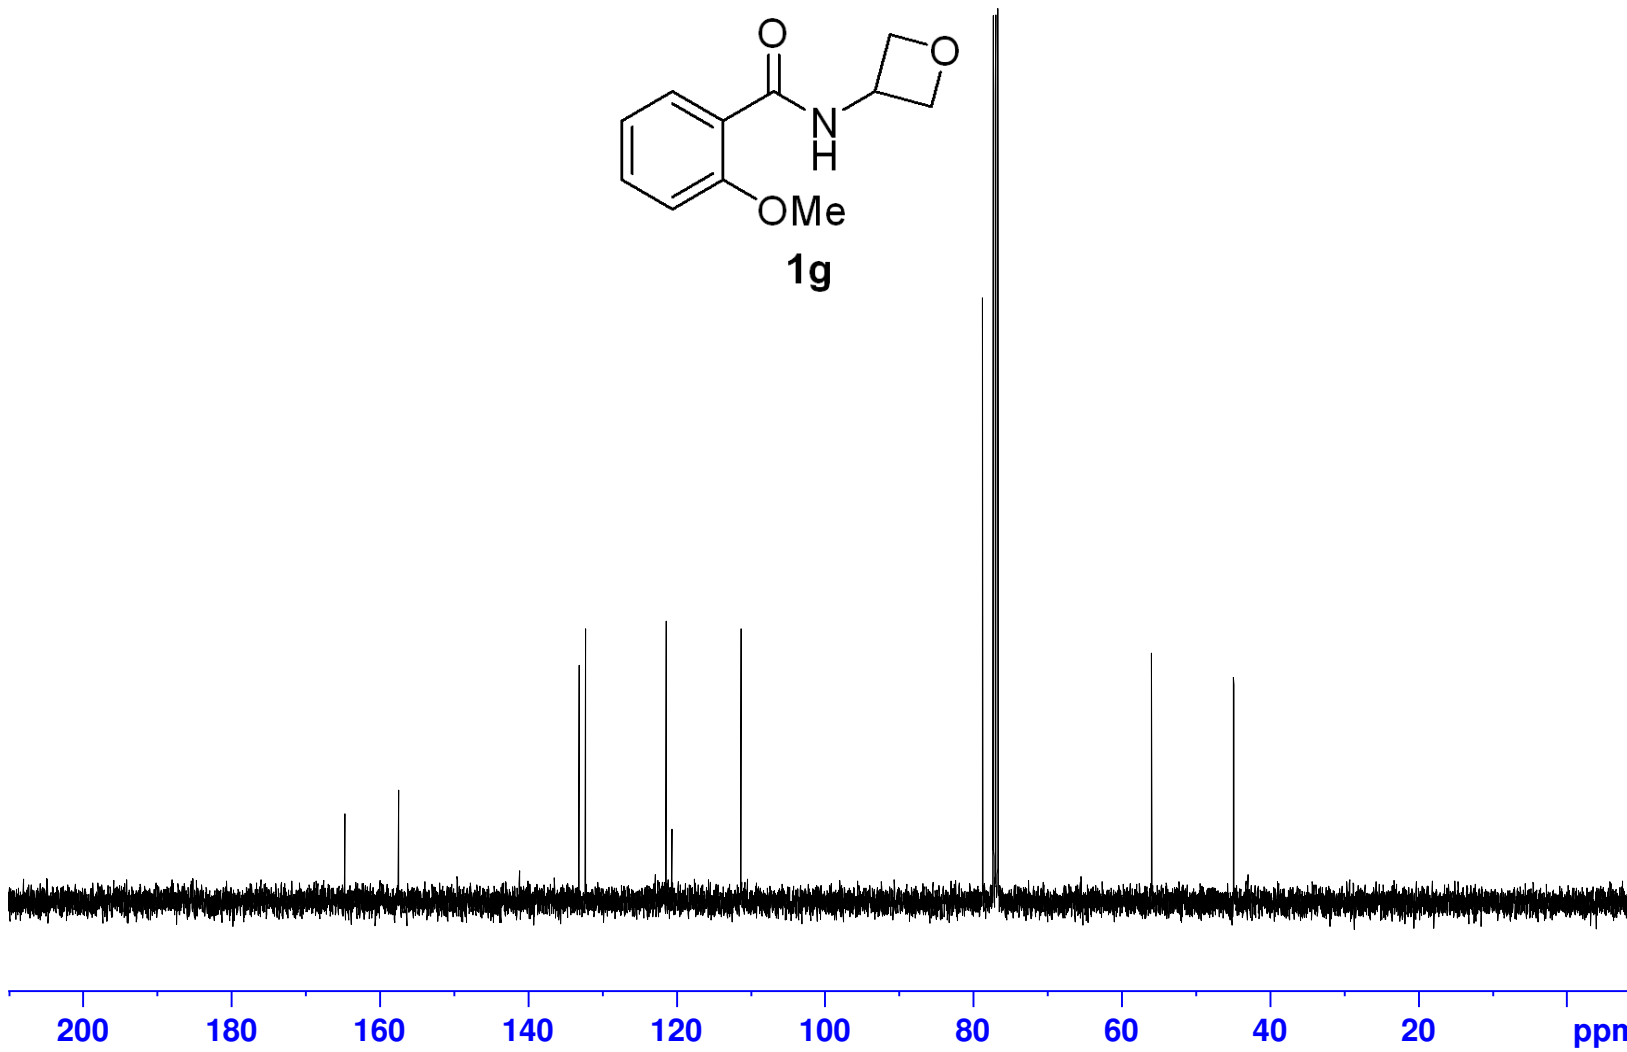

Current Data Parameters  
NAME lzw2052-c  
EXPNO 1  
PROCNO 1

F2 - Acquisition Parameters  
Date\_ 20150307  
Time 20.57  
INSTRUM spect  
PROBHD 5 mm PABBO BB/  
PULPROG zgpg30  
TD 65536  
SOLVENT CDC13  
NS 17  
DS 2  
SWH 24038.461 Hz  
FIDRES 0.366798 Hz  
AQ 1.3631488 sec  
RG 196.92  
DW 20.800 usec  
DE 6.50 usec  
TE 298.0 K  
D1 2.00000000 sec  
D11 0.03000000 sec  
TD0 1

==== CHANNEL f1 =====  
SFO1 100.6228298 MHz  
NUC1 13C  
P1 9.70 usec  
PLW1 46.98899841 W

==== CHANNEL f2 =====  
SFO2 400.1316005 MHz  
NUC2 1H  
CPDPRG[2] waltz16  
PCPD2 90.00 usec  
PLW2 11.99499989 W  
PLW12 0.34213999 W  
PLW13 0.27713001 W

F2 - Processing parameters  
SI 32768  
SF 100.6127753 MHz  
WDW EM  
SSB 0  
LB 1.00 Hz  
GB 0  
PC 1.40



Current Data Parameters  
NAME YW-1691  
EXPNO 1  
PROCNO 1

F2 - Acquisition Parameters  
Date\_ 20160319  
Time 20.02  
INSTRUM spect  
PROBHD 5 mm PABBO BB/  
PULPROG zg30  
TD 65536  
SOLVENT CDC13  
NS 14  
DS 0  
SWH 8012.820 Hz  
FIDRES 0.122266 Hz  
AQ 4.0894465 sec  
RG 88.84  
DW 62.400 usec  
DE 6.50 usec  
TE 297.8 K  
D1 1.00000000 sec  
TD0 1

==== CHANNEL f1 =====  
SFO1 400.1324710 MHz  
NUC1 1H  
P1 14.50 usec  
PLW1 11.99499989 W

F2 - Processing parameters  
SI 65536  
SF 400.1300093 MHz  
WDW EM  
SSB 0  
LB 0.30 Hz  
GB 0  
PC 1.00

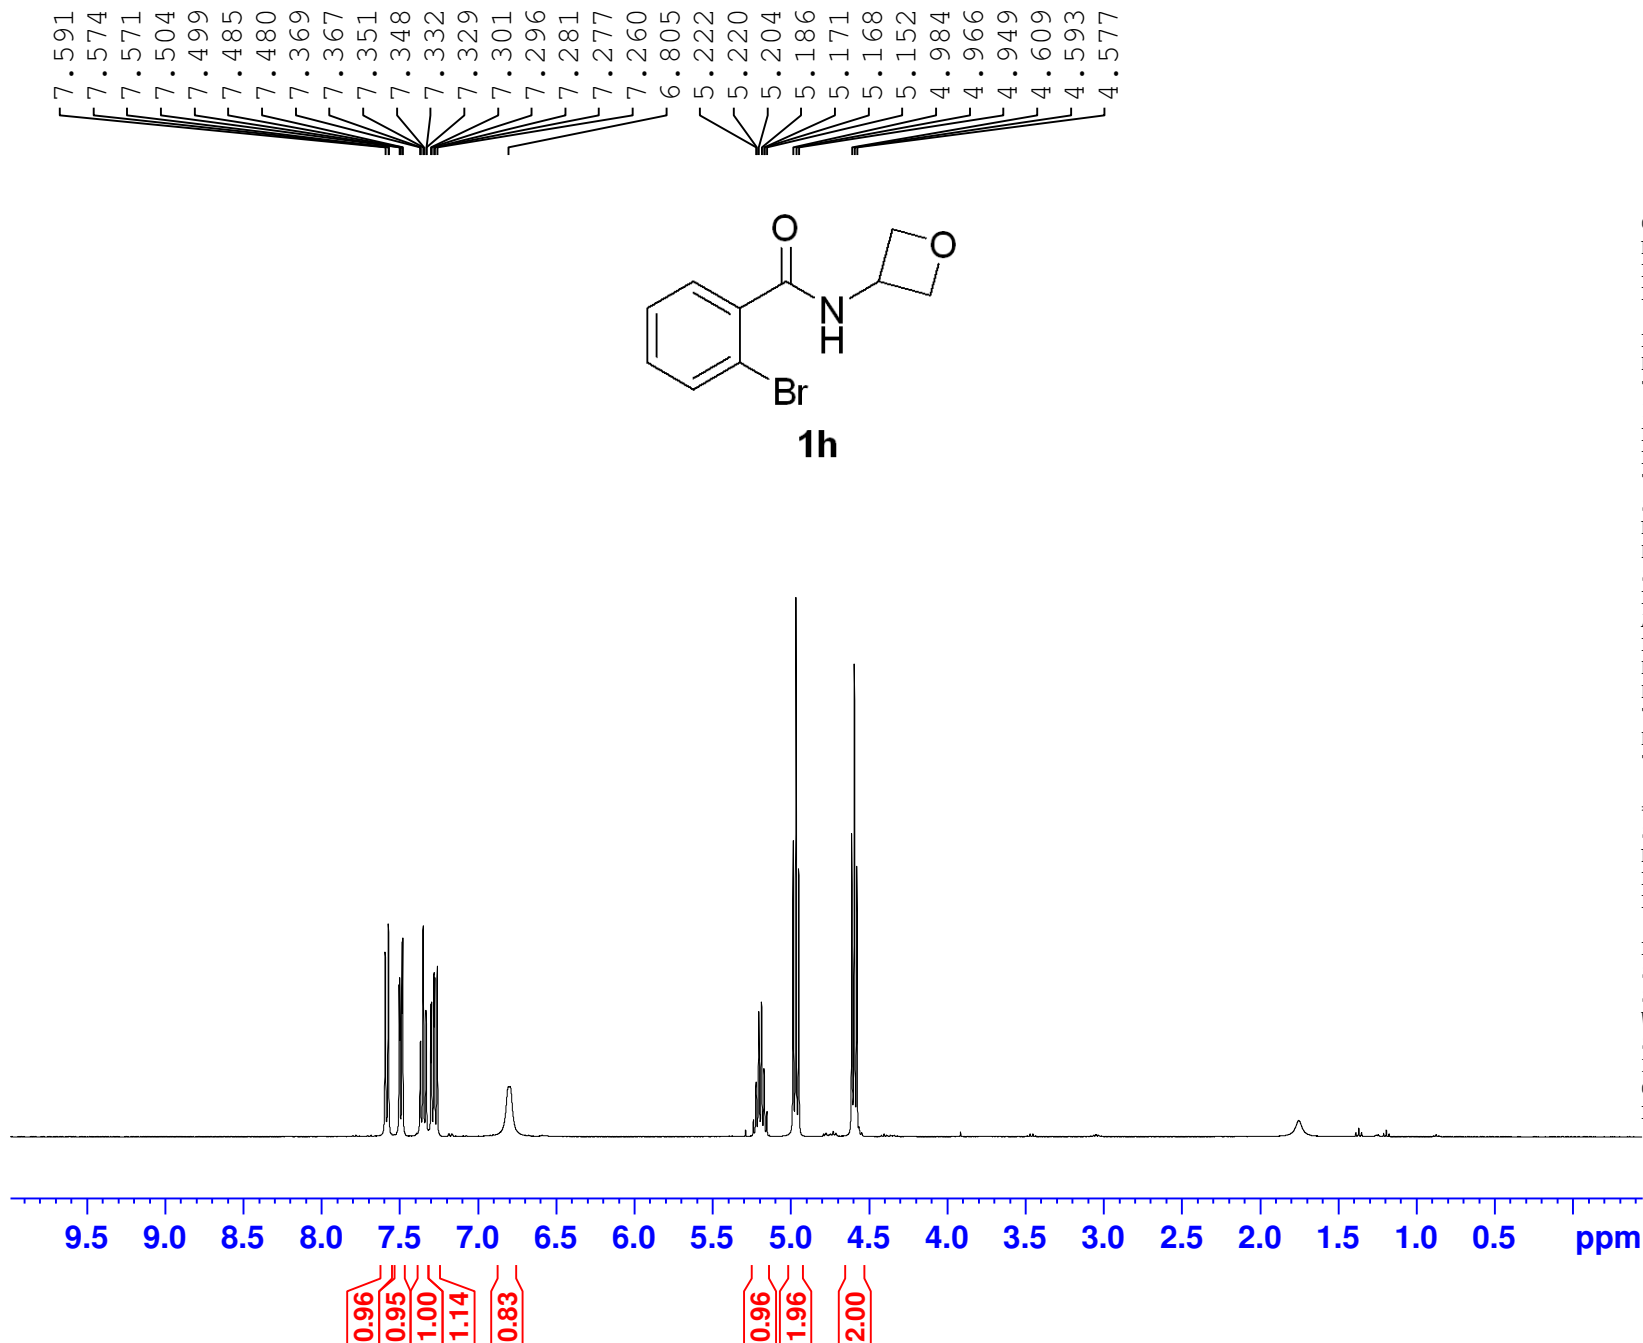

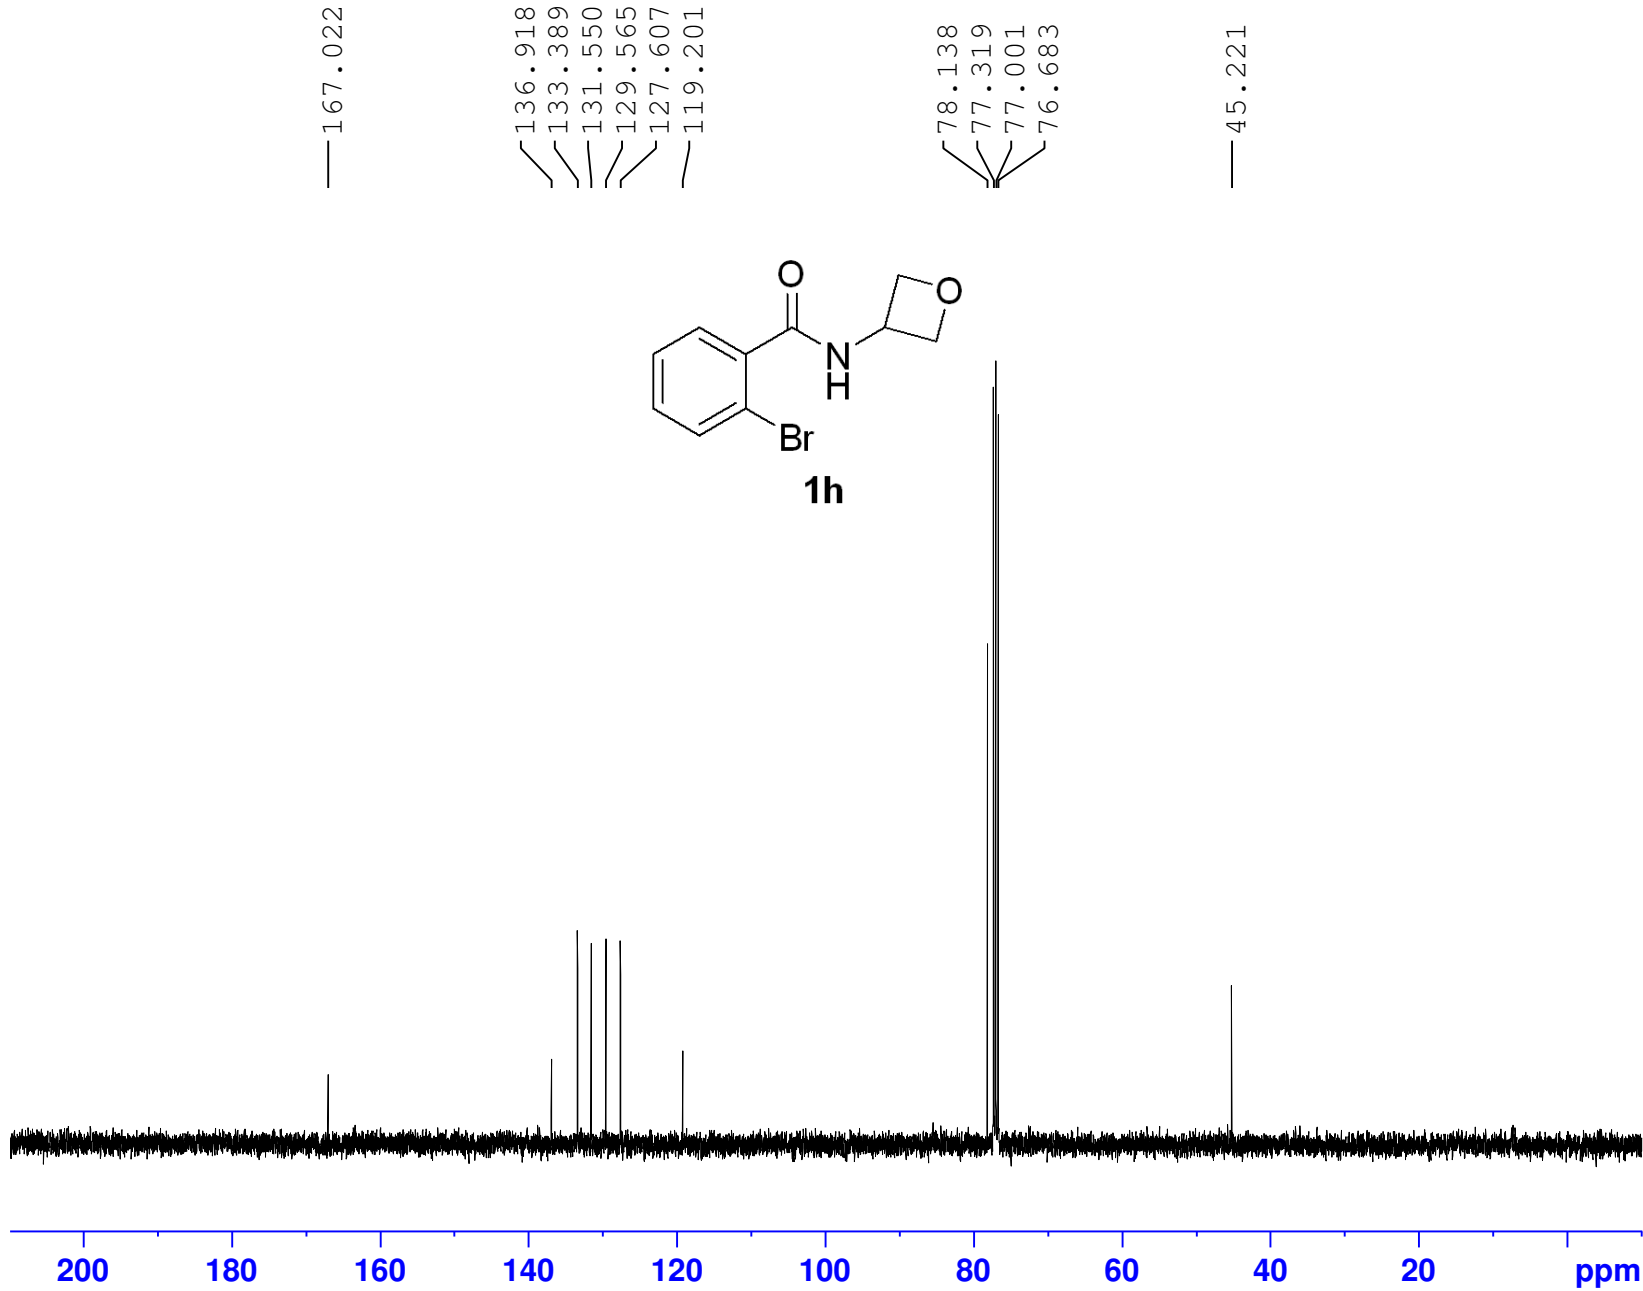

Current Data Parameters  
NAME YW-1691-carbon  
EXPNO 1  
PROCNO 1

F2 - Acquisition Parameters  
Date\_ 20160319  
Time 20.04  
INSTRUM spect  
PROBHD 5 mm PABBO BB/  
PULPROG zgpg30  
TD 65536  
SOLVENT CDC13  
NS 30  
DS 0  
SWH 24038.461 Hz  
FIDRES 0.366798 Hz  
AQ 1.3631488 sec  
RG 196.92  
DW 20.800 usec  
DE 6.50 usec  
TE 298.6 K  
D1 2.00000000 sec  
D11 0.03000000 sec  
TD0 1

==== CHANNEL f1 =====  
SFO1 100.6228298 MHz  
NUC1 13C  
P1 9.70 usec  
PLW1 46.98899841 W

==== CHANNEL f2 =====  
SFO2 400.1316005 MHz  
NUC2 1H  
CPDPRG[2] waltz16  
PCPD2 90.00 usec  
PLW2 11.99499989 W  
PLW12 0.34213999 W  
PLW13 0.27713001 W

F2 - Processing parameters  
SI 32768  
SF 100.6127744 MHz  
WDW EM  
SSB 0  
LB 1.00 Hz  
GB 0  
PC 1.40



Current Data Parameters  
NAME YW-1693  
EXPNO 1  
PROCNO 1

F2 - Acquisition Parameters  
Date\_ 20160323  
Time 20.22  
INSTRUM spect  
PROBHD 5 mm PABBO BB/  
PULPROG zg30  
TD 65536  
SOLVENT CDC13  
NS 4  
DS 0  
SWH 8012.820 Hz  
FIDRES 0.122266 Hz  
AQ 4.0894465 sec  
RG 88.84  
DW 62.400 usec  
DE 6.50 usec  
TE 297.4 K  
D1 1.00000000 sec  
TD0 1

==== CHANNEL f1 =====  
SFO1 400.1324710 MHz  
NUC1 1H  
P1 14.50 usec  
PLW1 11.99499989 W

F2 - Processing parameters  
SI 65536  
SF 400.130094 MHz  
WDW EM  
SSB 0  
LB 0.30 Hz  
GB 0  
PC 1.00

7.384  
7.382  
7.365  
7.363  
7.356  
7.348  
7.337  
7.260  
7.118  
7.110  
7.103  
7.098  
7.095  
7.090  
7.083  
7.075  
6.699  
6.684  
5.205  
5.190  
5.187  
5.171  
5.153  
5.138  
5.135  
5.119  
4.966  
4.948  
4.930  
4.622  
4.606  
4.590

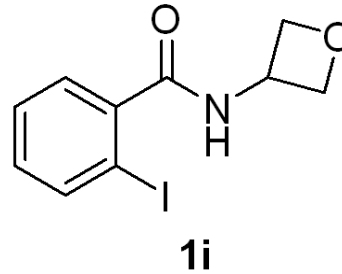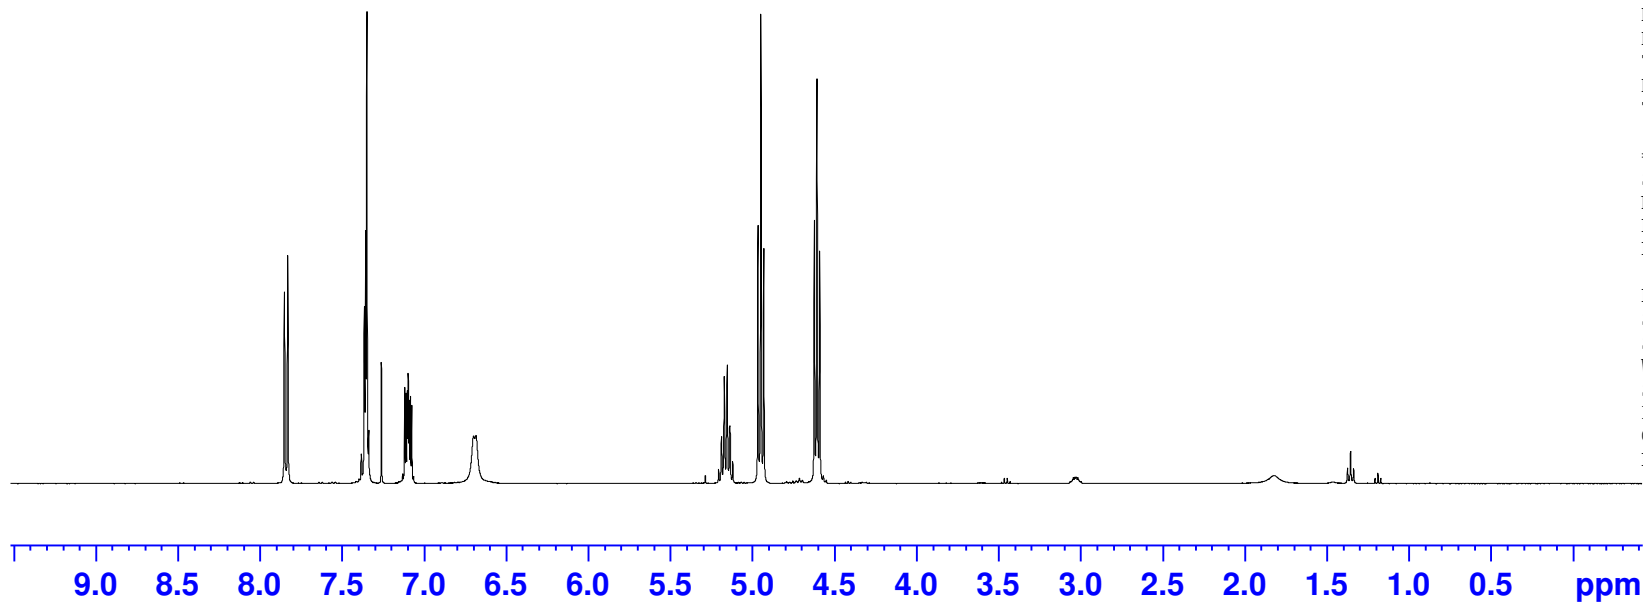

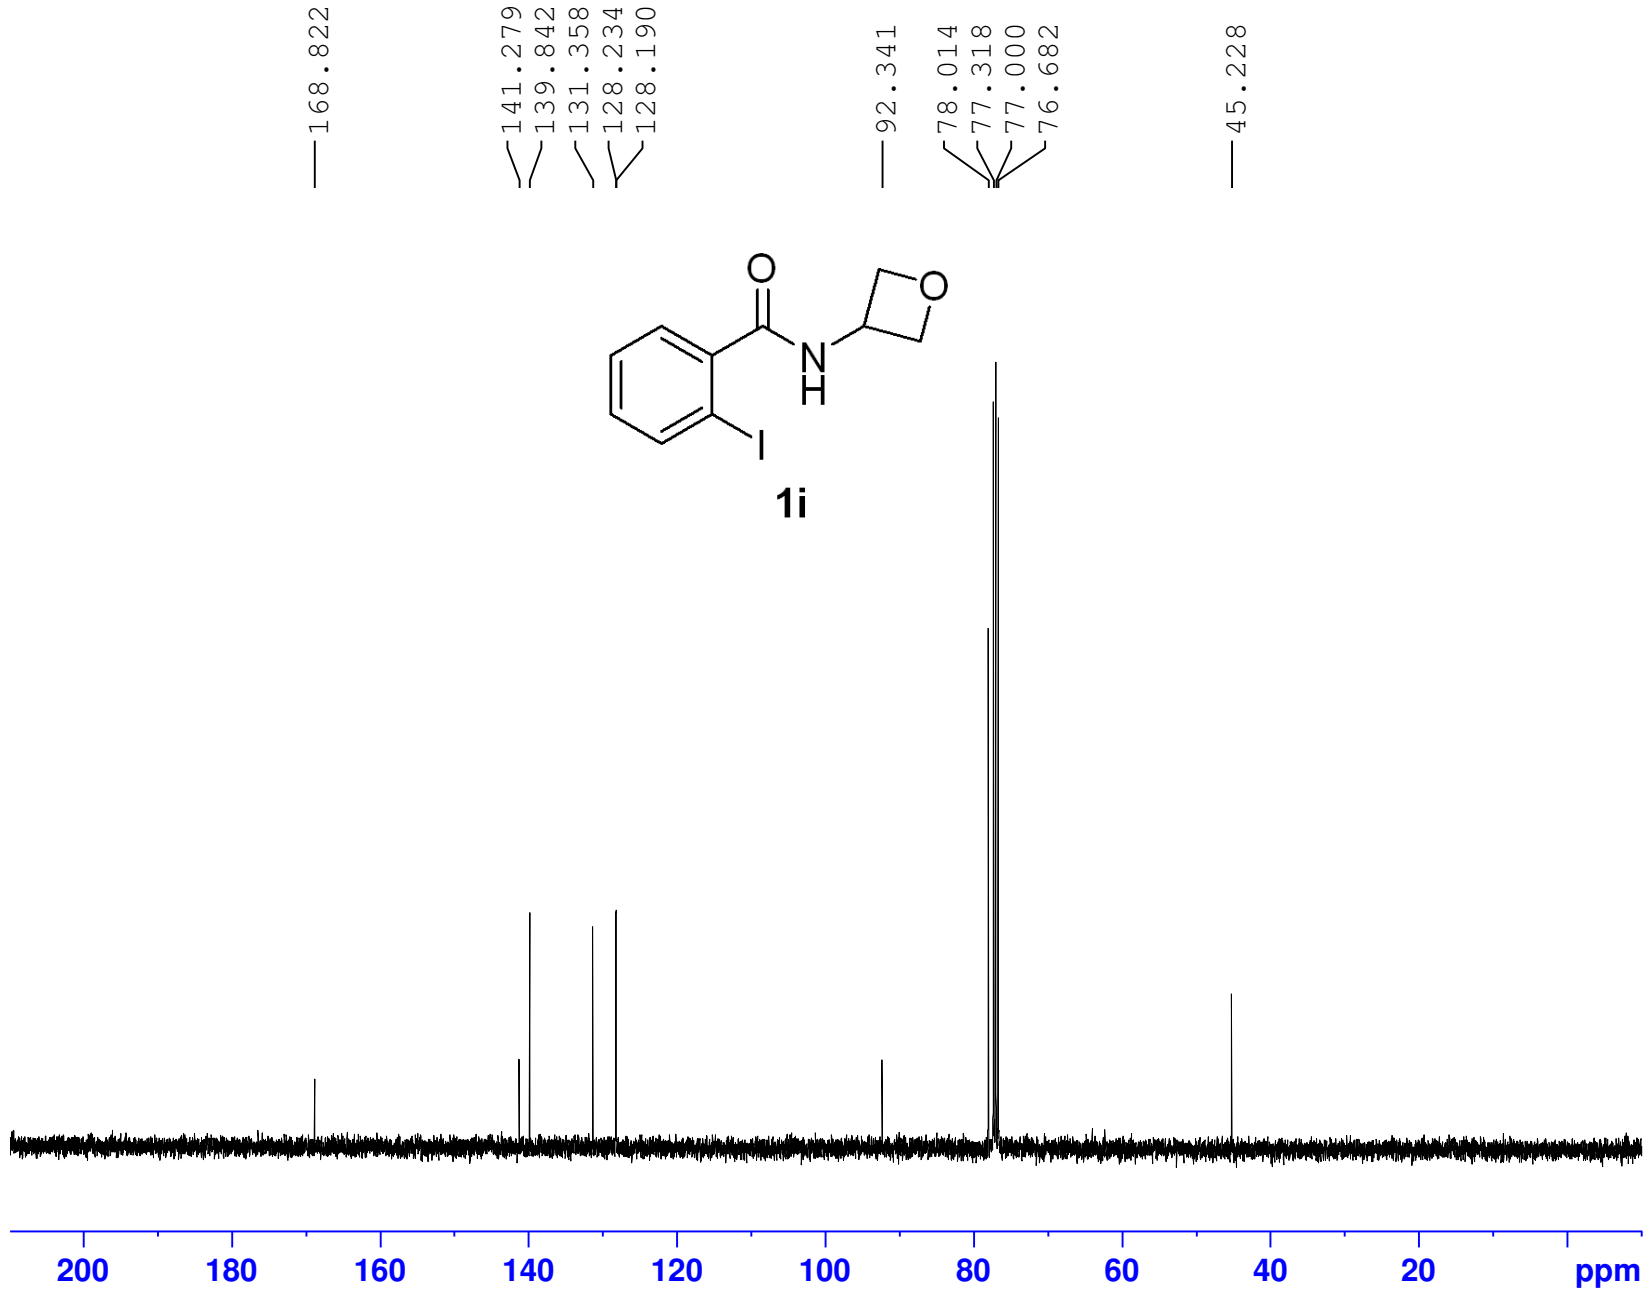

Current Data Parameters  
NAME YW-1693-carbon  
EXPNO 1  
PROCNO 1

F2 - Acquisition Parameters  
Date\_ 20160323  
Time 20.24  
INSTRUM spect  
PROBHD 5 mm PABBO BB/  
PULPROG zgpg30  
TD 65536  
SOLVENT CDC13  
NS 34  
DS 0  
SWH 24038.461 Hz  
FIDRES 0.366798 Hz  
AQ 1.3631488 sec  
RG 196.92  
DW 20.800 usec  
DE 6.50 usec  
TE 298.2 K  
D1 2.00000000 sec  
D11 0.03000000 sec  
TD0 1

==== CHANNEL f1 =====  
SFO1 100.6228298 MHz  
NUC1 13C  
P1 9.70 usec  
PLW1 46.98899841 W

==== CHANNEL f2 =====  
SFO2 400.1316005 MHz  
NUC2 1H  
CPDPRG[2] waltz16  
PCPD2 90.00 usec  
PLW2 11.99499989 W  
PLW12 0.34213999 W  
PLW13 0.27713001 W

F2 - Processing parameters  
SI 32768  
SF 100.6127758 MHz  
WDW EM  
SSB 0  
LB 1.00 Hz  
GB 0  
PC 1.40



7.260  
7.003  
6.971  
5.216  
5.199  
5.182  
5.166  
5.005  
4.988  
4.970  
4.617  
4.601  
4.585  
3.859

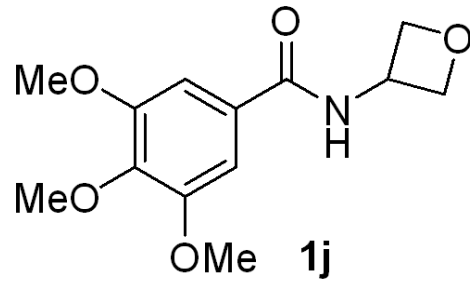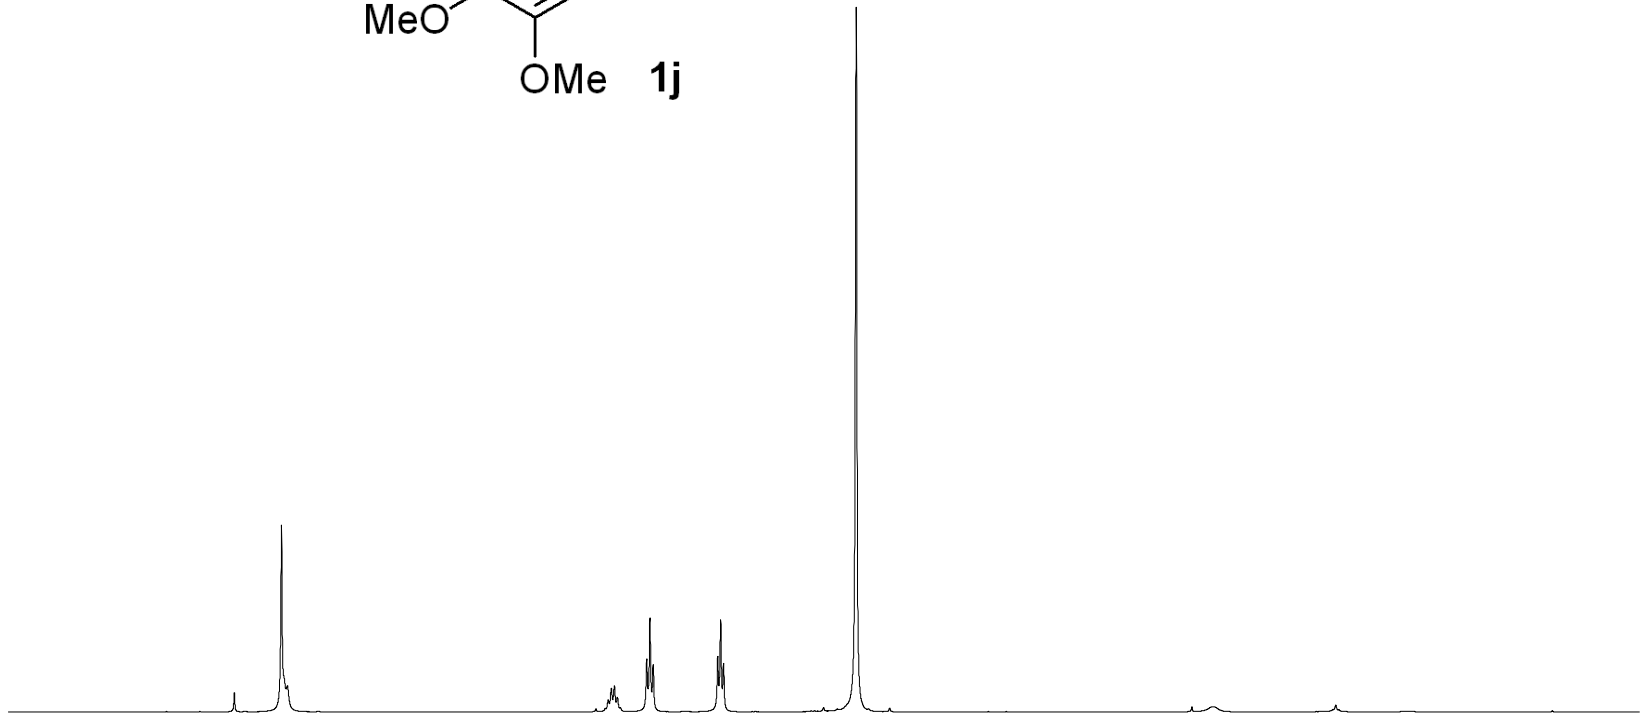

Current Data Parameters  
NAME lzw2051-h  
EXPNO 1  
PROCNO 1

F2 - Acquisition Parameters  
Date\_ 20150307  
Time 14.31  
INSTRUM spect  
PROBHD 5 mm PABBO BB/  
PULPROG zg30  
TD 65536  
SOLVENT CDC13  
NS 8  
DS 2  
SWH 8012.820 Hz  
FIDRES 0.122266 Hz  
AQ 4.0894465 sec  
RG 70.97  
DW 62.400 usec  
DE 6.50 usec  
TE 296.4 K  
D1 1.00000000 sec  
TD0 1

==== CHANNEL f1 =====  
SFO1 400.1324710 MHz  
NUC1 1H  
P1 14.50 usec  
PLW1 11.99499989 W

F2 - Processing parameters  
SI 65536  
SF 400.1300089 MHz  
WDW EM  
SSB 0  
LB 0.30 Hz  
GB 0  
PC 1.00

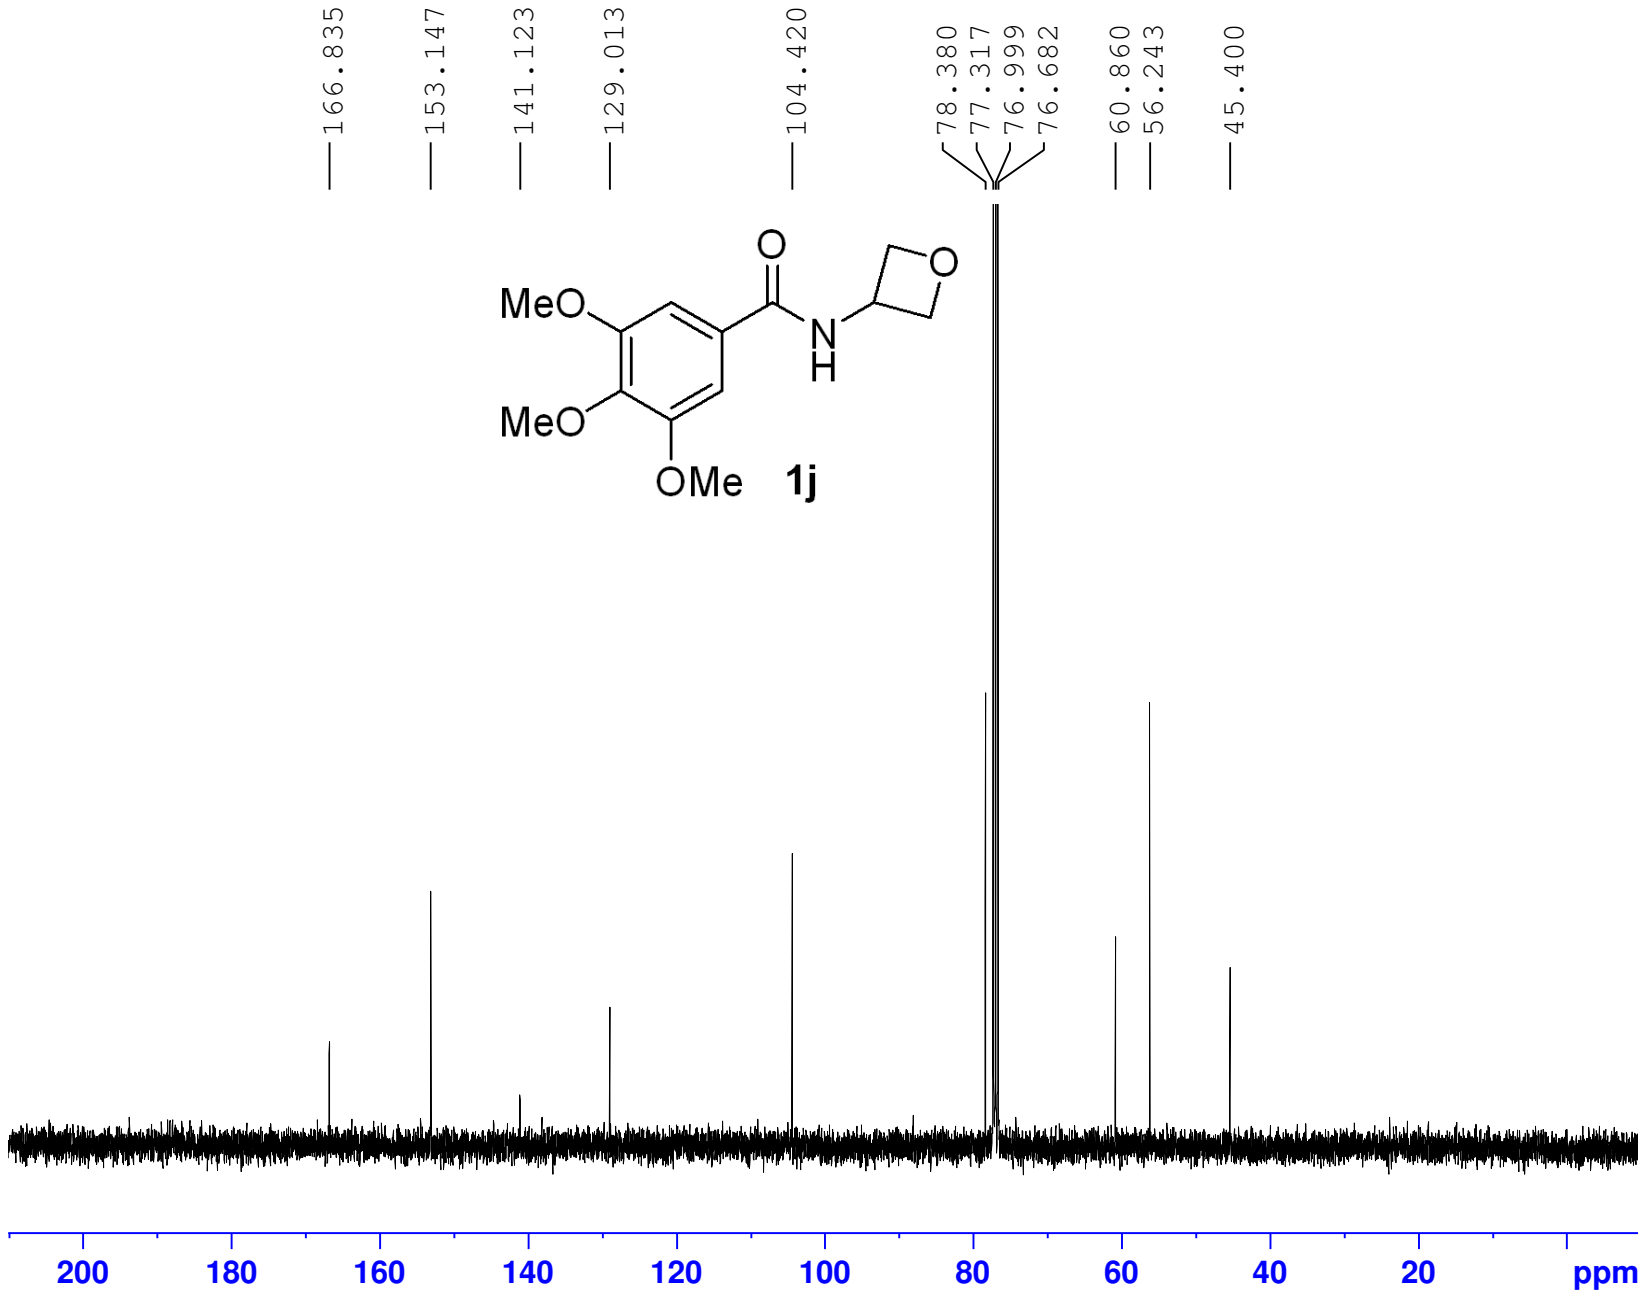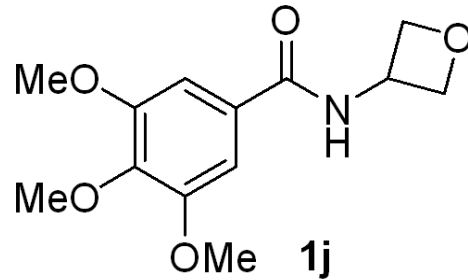

Current Data Parameters  
NAME lzw2051-c  
EXPNO 1  
PROCNO 1

F2 - Acquisition Parameters  
Date\_ 20150307  
Time 14.34  
INSTRUM spect  
PROBHD 5 mm PABBO BB/  
PULPROG zgpg30  
TD 65536  
SOLVENT CDC13  
NS 29  
DS 2  
SWH 24038.461 Hz  
FIDRES 0.366798 Hz  
AQ 1.3631488 sec  
RG 196.92  
DW 20.800 usec  
DE 6.50 usec  
TE 297.1 K  
D1 2.00000000 sec  
D11 0.03000000 sec  
TD0 1

==== CHANNEL f1 =====  
SFO1 100.6228298 MHz  
NUC1 13C  
P1 9.70 usec  
PLW1 46.98899841 W

==== CHANNEL f2 =====  
SFO2 400.1316005 MHz  
NUC2 1H  
CPDPRG[2] waltz16  
PCPD2 90.00 usec  
PLW2 11.99499989 W  
PLW12 0.34213999 W  
PLW13 0.27713001 W

F2 - Processing parameters  
SI 32768  
SF 100.6127754 MHz  
WDW EM  
SSB 0  
LB 1.00 Hz  
GB 0  
PC 1.40





Current Data Parameters  
NAME YW-(LZW2019)  
EXPNO 2  
PROCNO 1

F2 - Acquisition Parameters  
Date\_ 20160813  
Time 9.09  
INSTRUM spect  
PROBHD 5 mm PABBO BB/  
PULPROG zg30  
TD 65536  
SOLVENT CDC13  
NS 5  
DS 0  
SWH 8012.820 Hz  
FIDRES 0.122266 Hz  
AQ 4.0894465 sec  
RG 88.84  
DW 62.400 usec  
DE 6.50 usec  
TE 301.7 K  
D1 1.00000000 sec  
TD0 1

==== CHANNEL f1 =====  
SFO1 400.1324710 MHz  
NUC1 1H  
P1 14.50 usec  
PLW1 11.99499989 W

F2 - Processing parameters  
SI 65536  
SF 400.1300089 MHz  
WDW EM  
SSB 0  
LB 0.30 Hz  
GB 0  
PC 1.00

7.392  
7.381  
7.376  
7.371  
7.360  
7.355  
7.339  
7.260  
6.971  
6.962  
6.950  
6.942  
6.937  
6.922  
6.915  
6.795  
5.257  
5.240  
5.223  
5.205  
5.189  
5.171  
4.986  
4.968  
4.951  
4.587  
4.571  
4.554

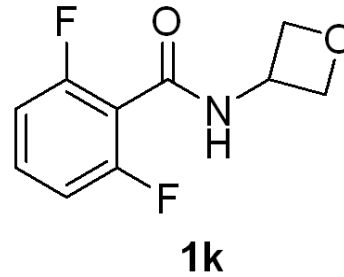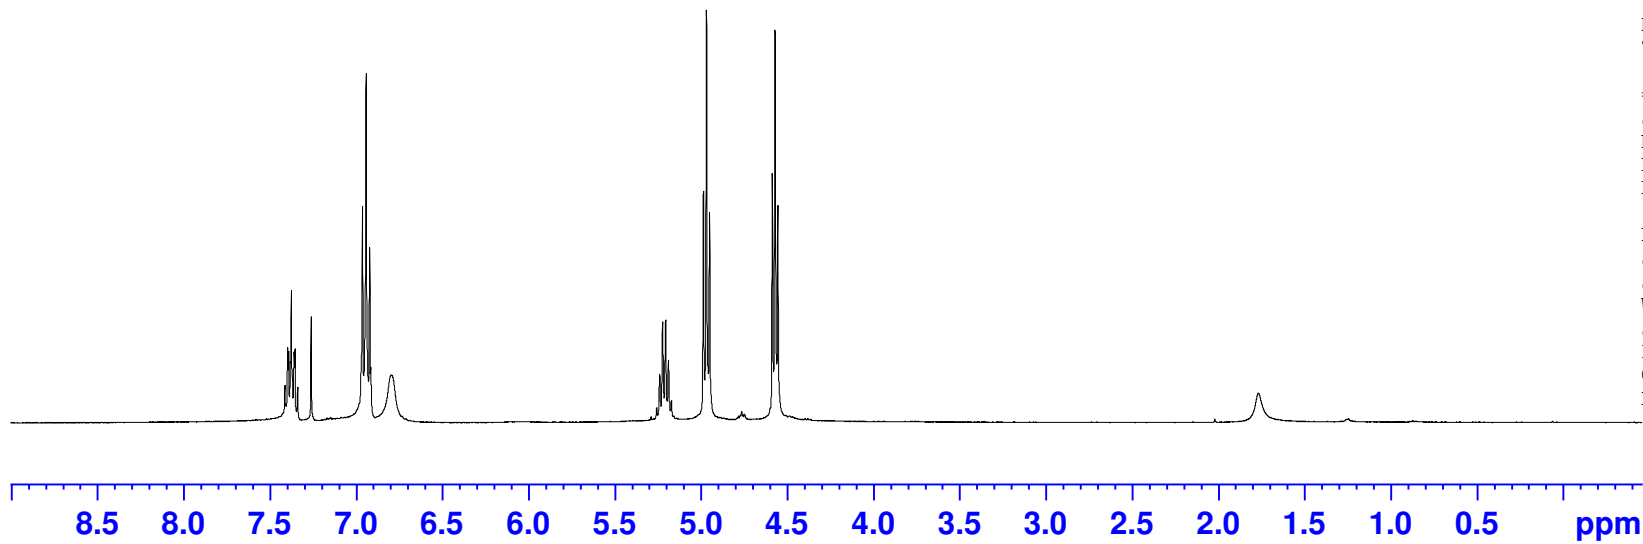

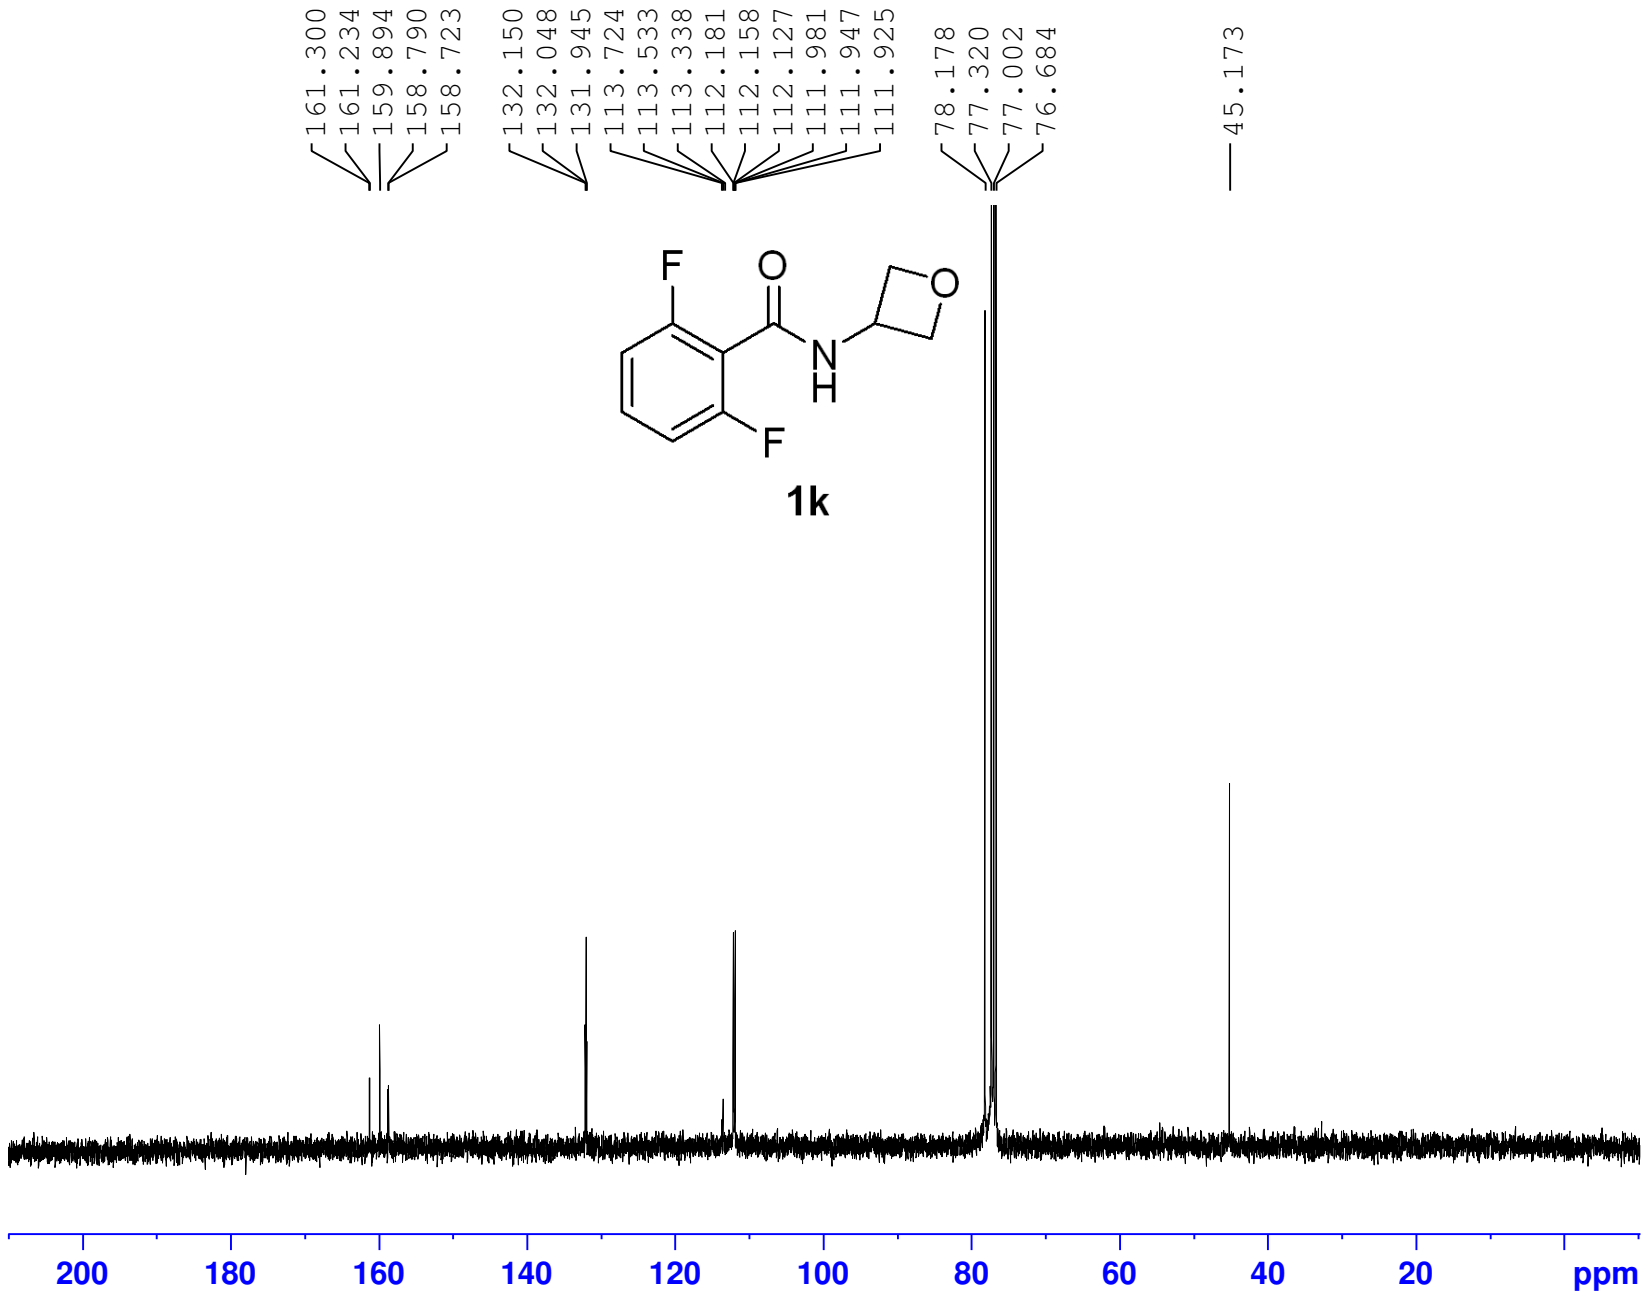

Current Data Parameters  
NAME YW-(LZW2019)-carbon  
EXPNO 1  
PROCNO 1

F2 - Acquisition Parameters  
Date\_ 20160813  
Time 9.26  
INSTRUM spect  
PROBHD 5 mm PABBO BB/  
PULPROG zgpg30  
TD 65536  
SOLVENT CDC13  
NS 240  
DS 0  
SWH 24038.461 Hz  
FIDRES 0.366798 Hz  
AQ 1.3631488 sec  
RG 196.92  
DW 20.800 usec  
DE 6.50 usec  
TE 301.9 K  
D1 2.00000000 sec  
D11 0.03000000 sec  
TD0 1

==== CHANNEL f1 =====  
SFO1 100.6228298 MHz  
NUC1 13C  
P1 9.70 usec  
PLW1 46.98899841 W

==== CHANNEL f2 =====  
SFO2 400.1316005 MHz  
NUC2 1H  
CPDPRG[2] waltz16  
PCPD2 90.00 usec  
PLW2 11.99499989 W  
PLW12 0.34213999 W  
PLW13 0.27713001 W

F2 - Processing parameters  
SI 32768  
SF 100.6127716 MHz  
WDW EM  
SSB 0  
LB 1.00 Hz  
GB 0  
PC 1.40

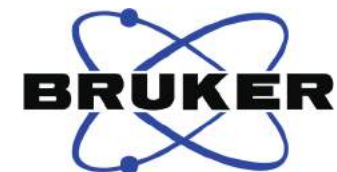

Current Data Parameters  
NAME YW-(LZW2019)-19F  
EXPNO 1  
PROCNO 1

F2 - Acquisition Parameters  
Date\_ 20160813  
Time 10.05  
INSTRUM spect  
PROBHD 5 mm PABBO BB/  
PULPROG zgflqn  
TD 131072  
SOLVENT CDCl3  
NS 16  
DS 0  
SWH 89285.711 Hz  
FIDRES 0.681196 Hz  
AQ 0.7340032 sec  
RG 196.92  
DW 5.600 usec  
DE 6.50 usec  
TE 299.8 K  
D1 1.00000000 sec  
TD0 1

==== CHANNEL f1 =====  
SFO1 376.4607164 MHz  
NUC1 19F  
P1 14.70 usec  
PLW1 15.99600029 W

F2 - Processing parameters  
SI 65536  
SF 376.4983660 MHz  
WDW EM  
SSB 0  
LB 0.30 Hz  
GB 0  
PC 1.00

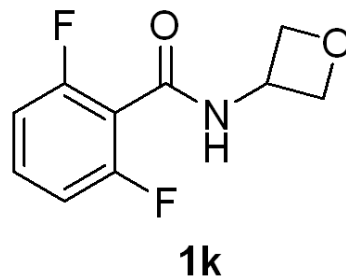

-112.06

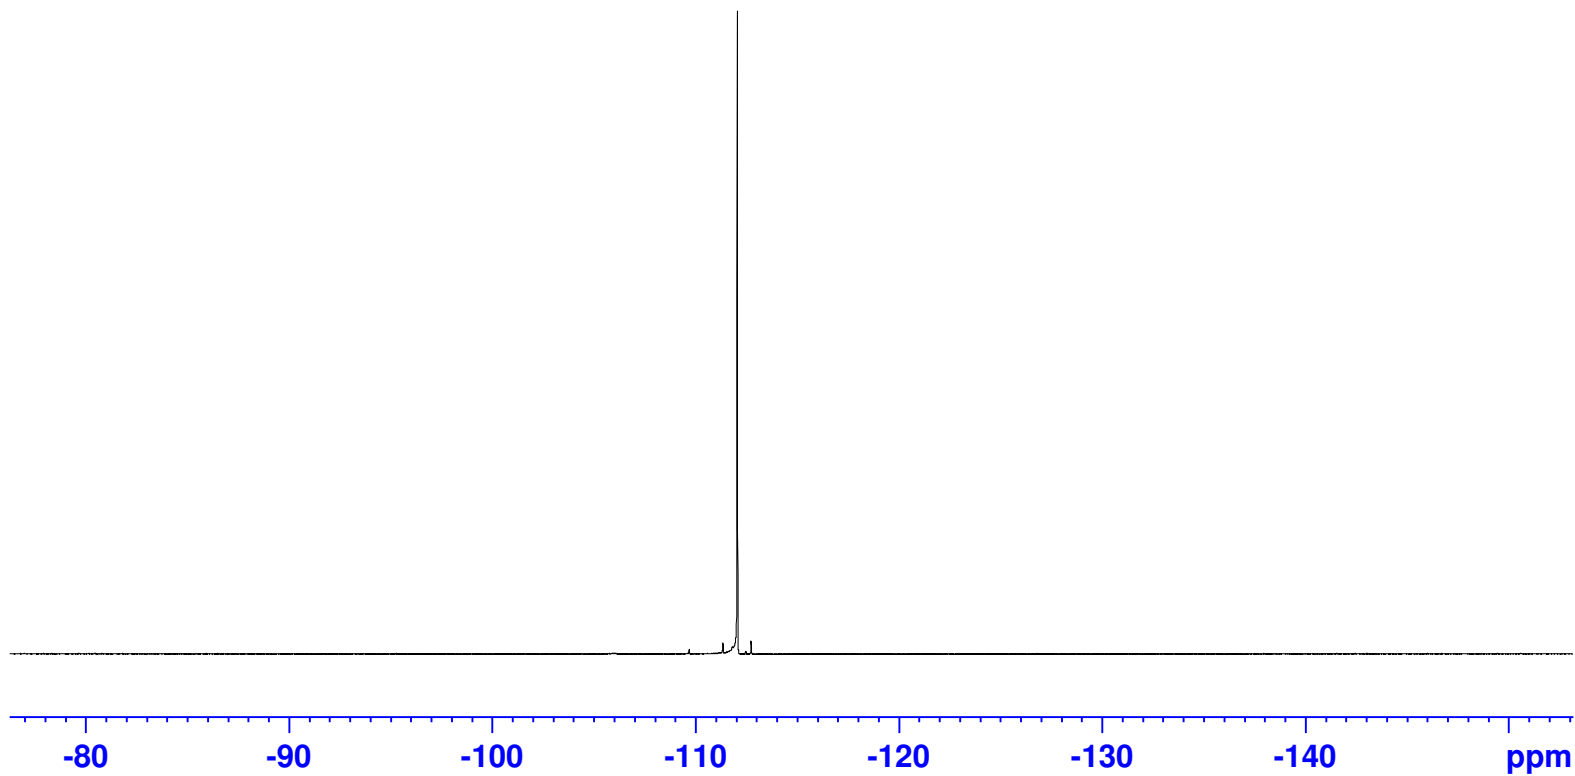



Current Data Parameters  
NAME lzw2060-h  
EXPNO 1  
PROCNO 1

F2 - Acquisition Parameters  
Date\_ 20150310  
Time 21.06  
INSTRUM spect  
PROBHD 5 mm PABBO BB/  
PULPROG zg30  
TD 65536  
SOLVENT CDCl3  
NS 6  
DS 2  
SWH 8012.820 Hz  
FIDRES 0.122266 Hz  
AQ 4.0894465 sec  
RG 112.31  
DW 62.400 usec  
DE 6.50 usec  
TE 297.7 K  
D1 1.00000000 sec  
TD0 1

==== CHANNEL f1 =====  
SFO1 400.1324710 MHz  
NUC1 1H  
P1 14.50 usec  
PLW1 11.99499989 W

F2 - Processing parameters  
SI 65536  
SF 400.1300095 MHz  
WDW EM  
SSB 0  
LB 0.30 Hz  
GB 0  
PC 1.00

8.307  
7.898  
7.876  
7.856  
7.846  
7.824  
7.593  
7.591  
7.576  
7.554  
7.534  
7.517  
7.259  
7.063  
7.048  
5.342  
5.325  
5.308  
5.291  
5.274  
5.257  
5.055  
5.037  
5.020  
4.681  
4.665  
4.648

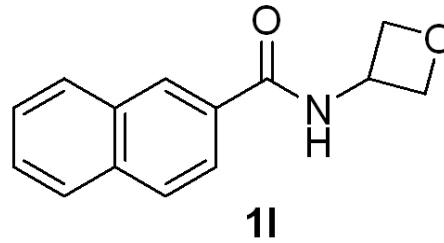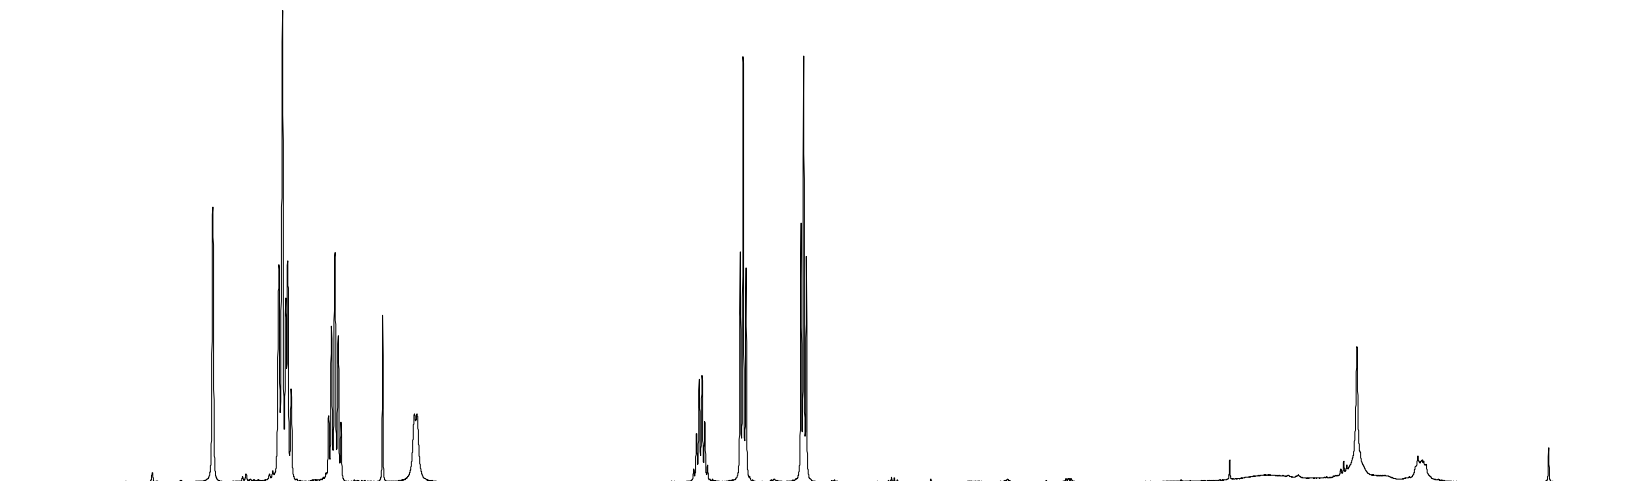

9.0 8.5 8.0 7.5 7.0 6.5 6.0 5.5 5.0 4.5 4.0 3.5 3.0 2.5 2.0 1.5 1.0 0.5 ppm

1.02  
4.16  
2.09  
0.98  
1.00  
2.05  
2.05

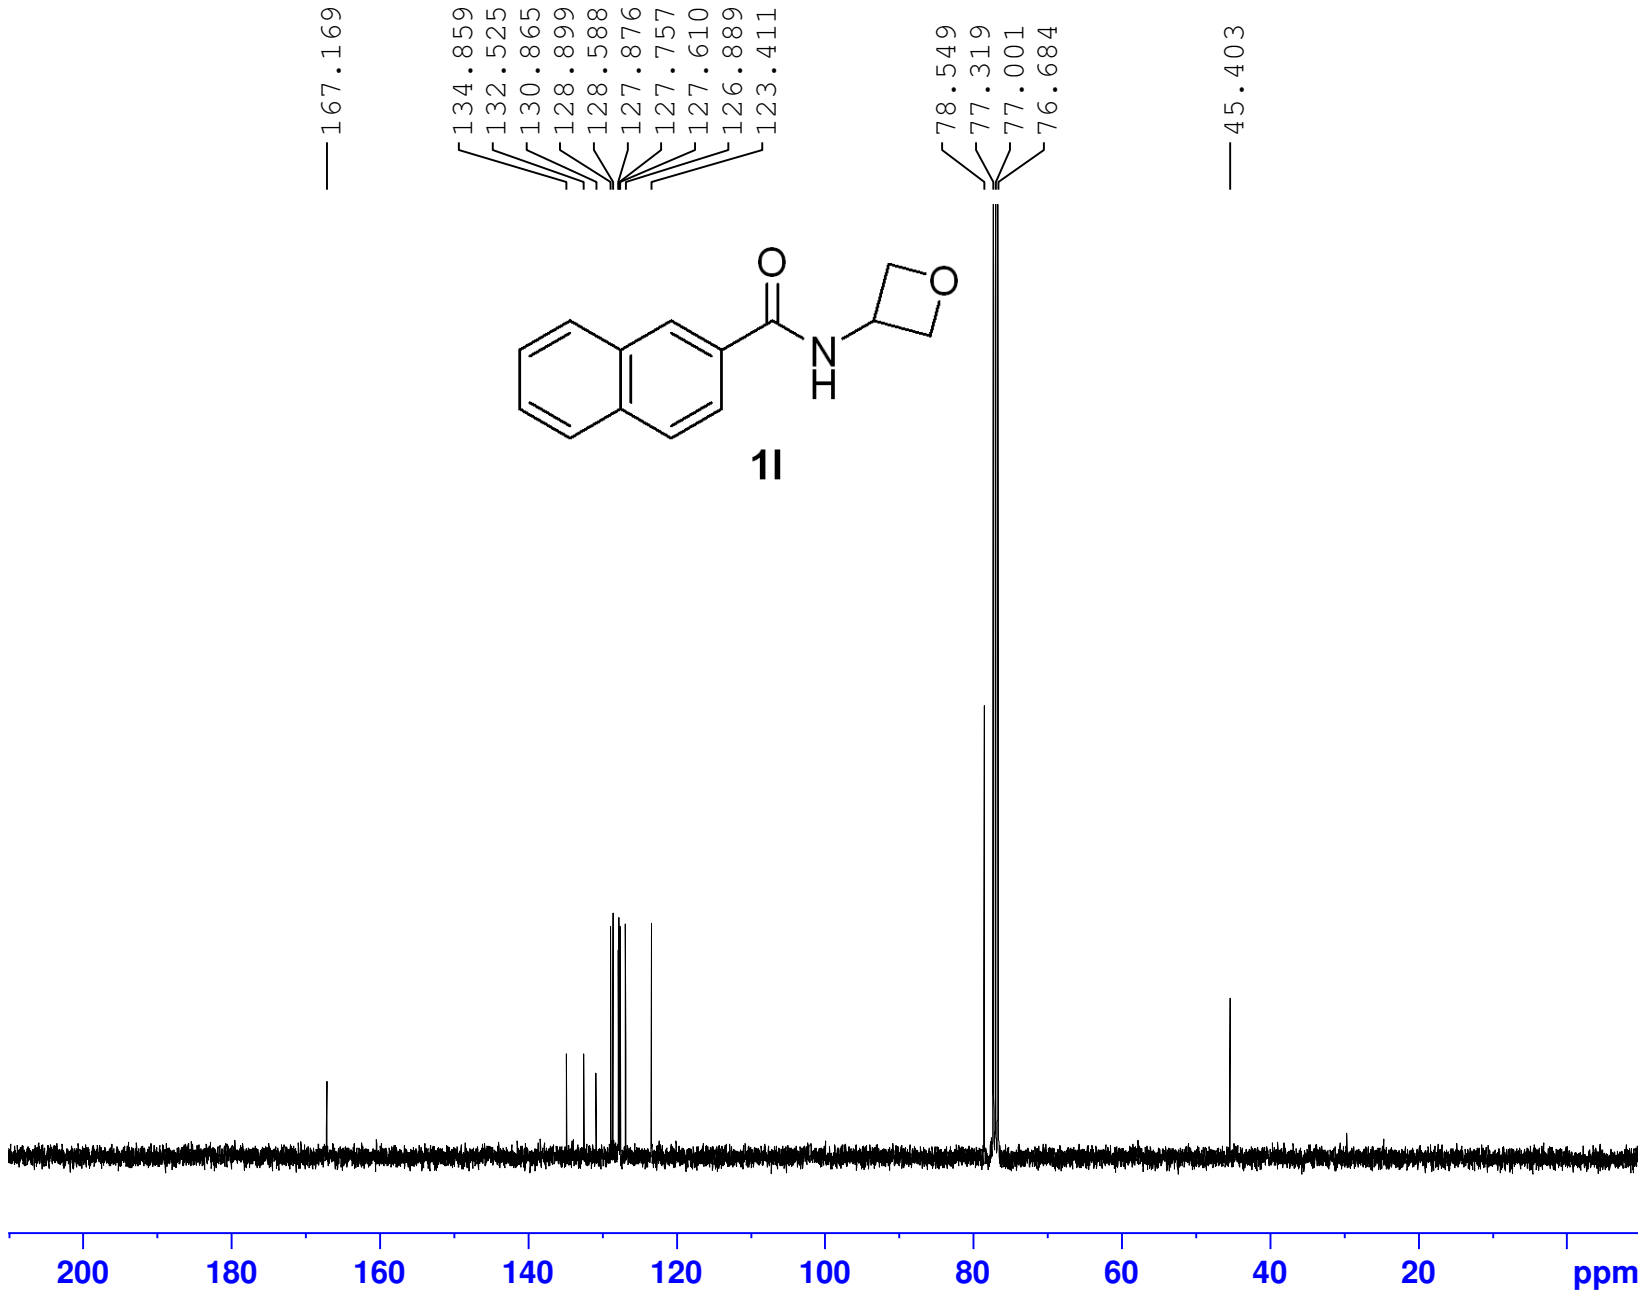

Current Data Parameters  
NAME lzw2060-c  
EXPNO 1  
PROCNO 1

F2 - Acquisition Parameters  
Date\_ 20150310  
Time 21.15  
INSTRUM spect  
PROBHD 5 mm PABBO BB/  
PULPROG zgpg30  
TD 65536  
SOLVENT CDC13  
NS 122  
DS 2  
SWH 24038.461 Hz  
FIDRES 0.366798 Hz  
AQ 1.3631488 sec  
RG 196.92  
DW 20.800 usec  
DE 6.50 usec  
TE 298.5 K  
D1 2.00000000 sec  
D11 0.03000000 sec  
TD0 1

==== CHANNEL f1 =====  
SFO1 100.6228298 MHz  
NUC1 13C  
P1 9.70 usec  
PLW1 46.98899841 W

==== CHANNEL f2 =====  
SFO2 400.1316005 MHz  
NUC2 1H  
CPDPRG[2] waltz16  
PCPD2 90.00 usec  
PLW2 11.99499989 W  
PLW12 0.34213999 W  
PLW13 0.27713001 W

F2 - Processing parameters  
SI 32768  
SF 100.6127728 MHz  
WDW EM  
SSB 0  
LB 1.00 Hz  
GB 0  
PC 1.40



7.598  
7.596  
7.589  
7.587  
7.500  
7.498  
7.488  
7.486  
7.260  
7.083  
7.074  
7.071  
7.062  
7.046  
5.236  
5.220  
5.202  
5.186  
5.168  
4.989  
4.971  
4.954  
4.639  
4.623  
4.607

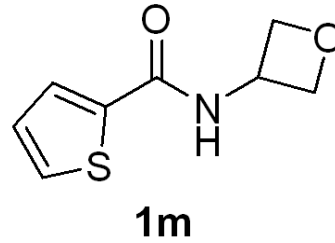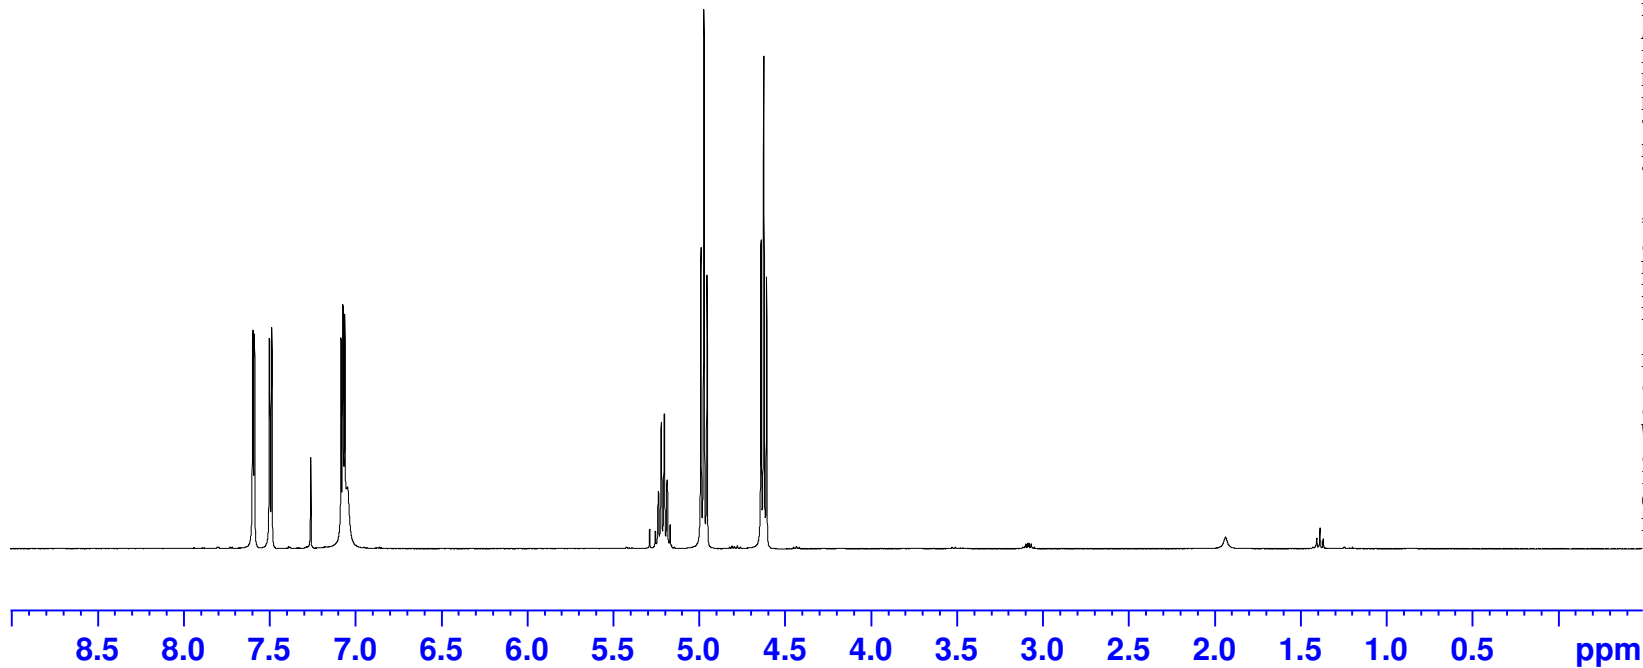

Current Data Parameters  
NAME YW-1777  
EXPNO 1  
PROCNO 1

F2 - Acquisition Parameters  
Date\_ 20160512  
Time 18.35  
INSTRUM spect  
PROBHD 5 mm PABBO BB/  
PULPROG zg30  
TD 65536  
SOLVENT CDC13  
NS 7  
DS 0  
SWH 8012.820 Hz  
FIDRES 0.122266 Hz  
AQ 4.0894465 sec  
RG 103.52  
DW 62.400 usec  
DE 6.50 usec  
TE 296.5 K  
D1 1.00000000 sec  
TD0 1

==== CHANNEL f1 =====  
SFO1 400.1324710 MHz  
NUC1 1H  
P1 14.50 usec  
PLW1 11.99499989 W

F2 - Processing parameters  
SI 65536  
SF 400.1300093 MHz  
WDW EM  
SSB 0  
LB 0.30 Hz  
GB 0  
PC 1.00



— 161.532

— 138.093  
— 130.569  
— 128.556  
— 127.714

— 78.342  
— 77.321  
— 77.003  
— 76.686

— 45.155

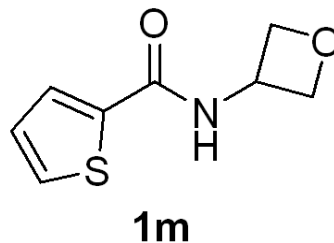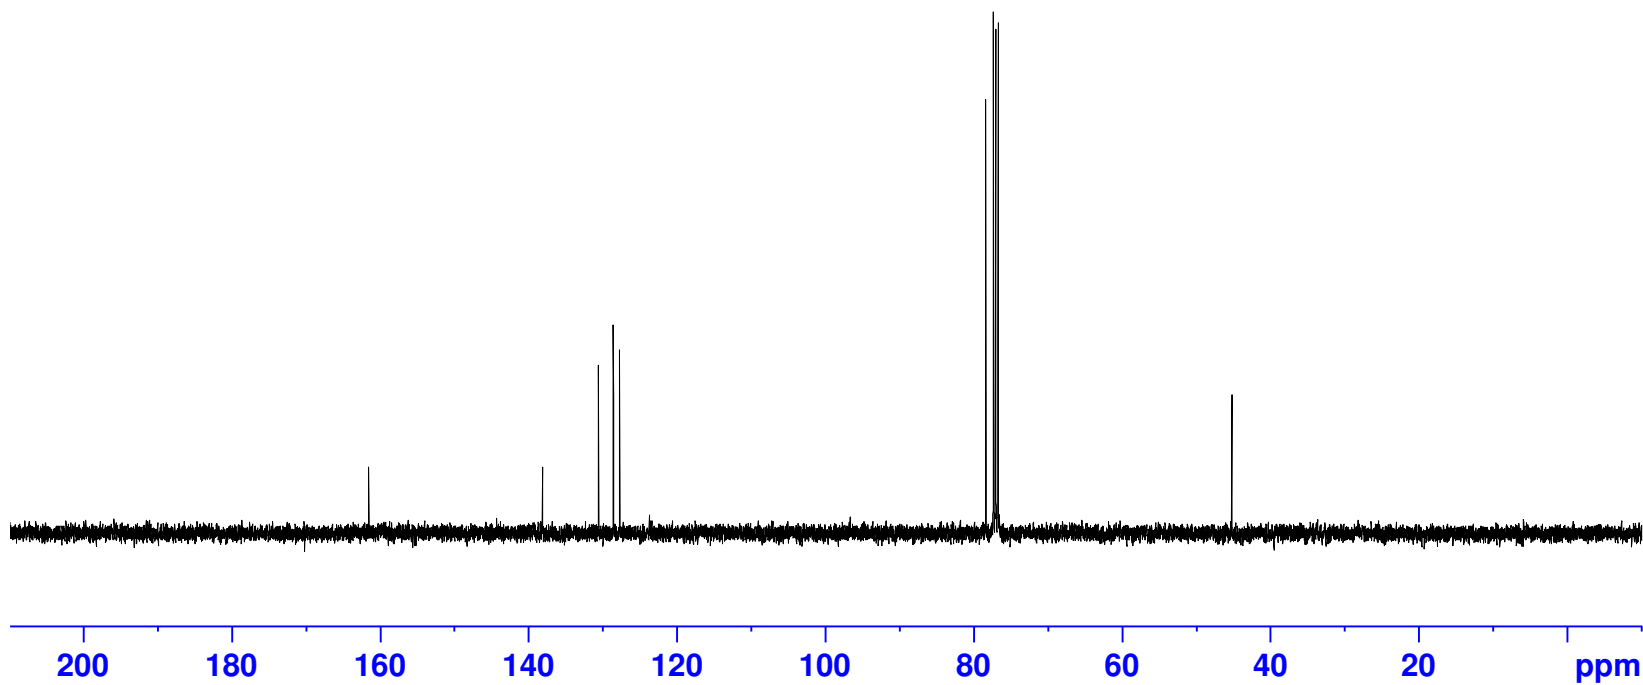

Current Data Parameters  
NAME YW-1777-carbon  
EXPNO 1  
PROCNO 1

F2 - Acquisition Parameters  
Date\_ 20160512  
Time 18.37  
INSTRUM spect  
PROBHD 5 mm PABBO BB/  
PULPROG zgpg30  
TD 65536  
SOLVENT CDC13  
NS 22  
DS 0  
SWH 24038.461 Hz  
FIDRES 0.366798 Hz  
AQ 1.3631488 sec  
RG 196.92  
DW 20.800 usec  
DE 6.50 usec  
TE 297.1 K  
D1 2.00000000 sec  
D11 0.03000000 sec  
TD0 1

==== CHANNEL f1 =====  
SFO1 100.6228298 MHz  
NUC1 13C  
P1 9.70 usec  
PLW1 46.98899841 W

==== CHANNEL f2 =====  
SFO2 400.1316005 MHz  
NUC2 1H  
CPDPRG[2] waltz16  
PCPD2 90.00 usec  
PLW2 11.99499989 W  
PLW12 0.34213999 W  
PLW13 0.27713001 W

F2 - Processing parameters  
SI 32768  
SF 100.6127758 MHz  
WDW EM  
SSB 0  
LB 1.00 Hz  
GB 0  
PC 1.40

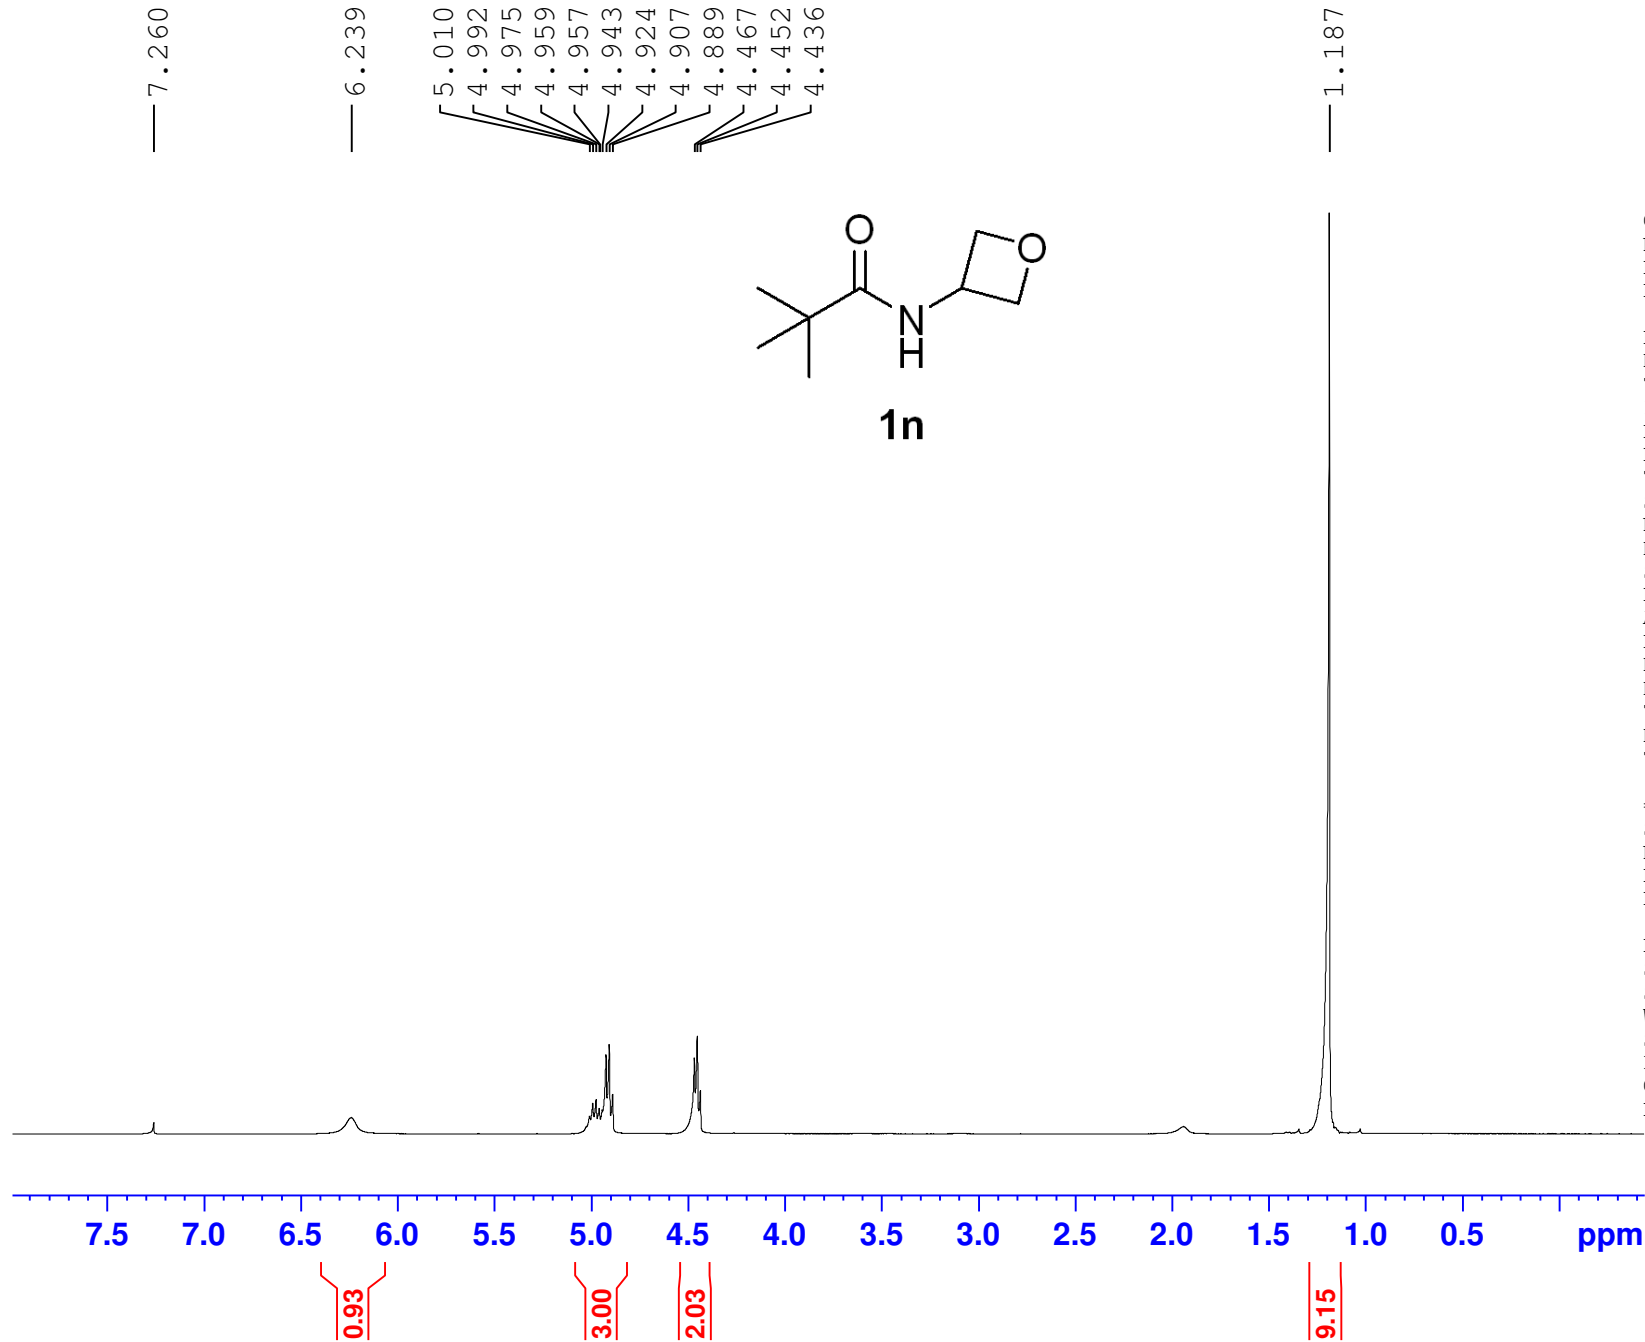

Current Data Parameters  
NAME YW-1780  
EXPNO 1  
PROCNO 1

F2 - Acquisition Parameters  
Date\_ 20160813  
Time 8.49  
INSTRUM spect  
PROBHD 5 mm PABBO BB/  
PULPROG zg30  
TD 65536  
SOLVENT CDC13  
NS 3  
DS 0  
SWH 8012.820 Hz  
FIDRES 0.122266 Hz  
AQ 4.0894465 sec  
RG 62.93  
DW 62.400 usec  
DE 6.50 usec  
TE 302.8 K  
D1 1.00000000 sec  
TD0 1

==== CHANNEL f1 =====  
SFO1 400.1324710 MHz  
NUC1 1H  
P1 14.50 usec  
PLW1 11.99499989 W

F2 - Processing parameters  
SI 65536  
SF 400.1300079 MHz  
WDW EM  
SSB 0  
LB 0.30 Hz  
GB 0  
PC 1.00



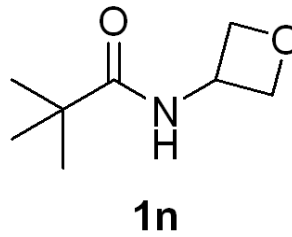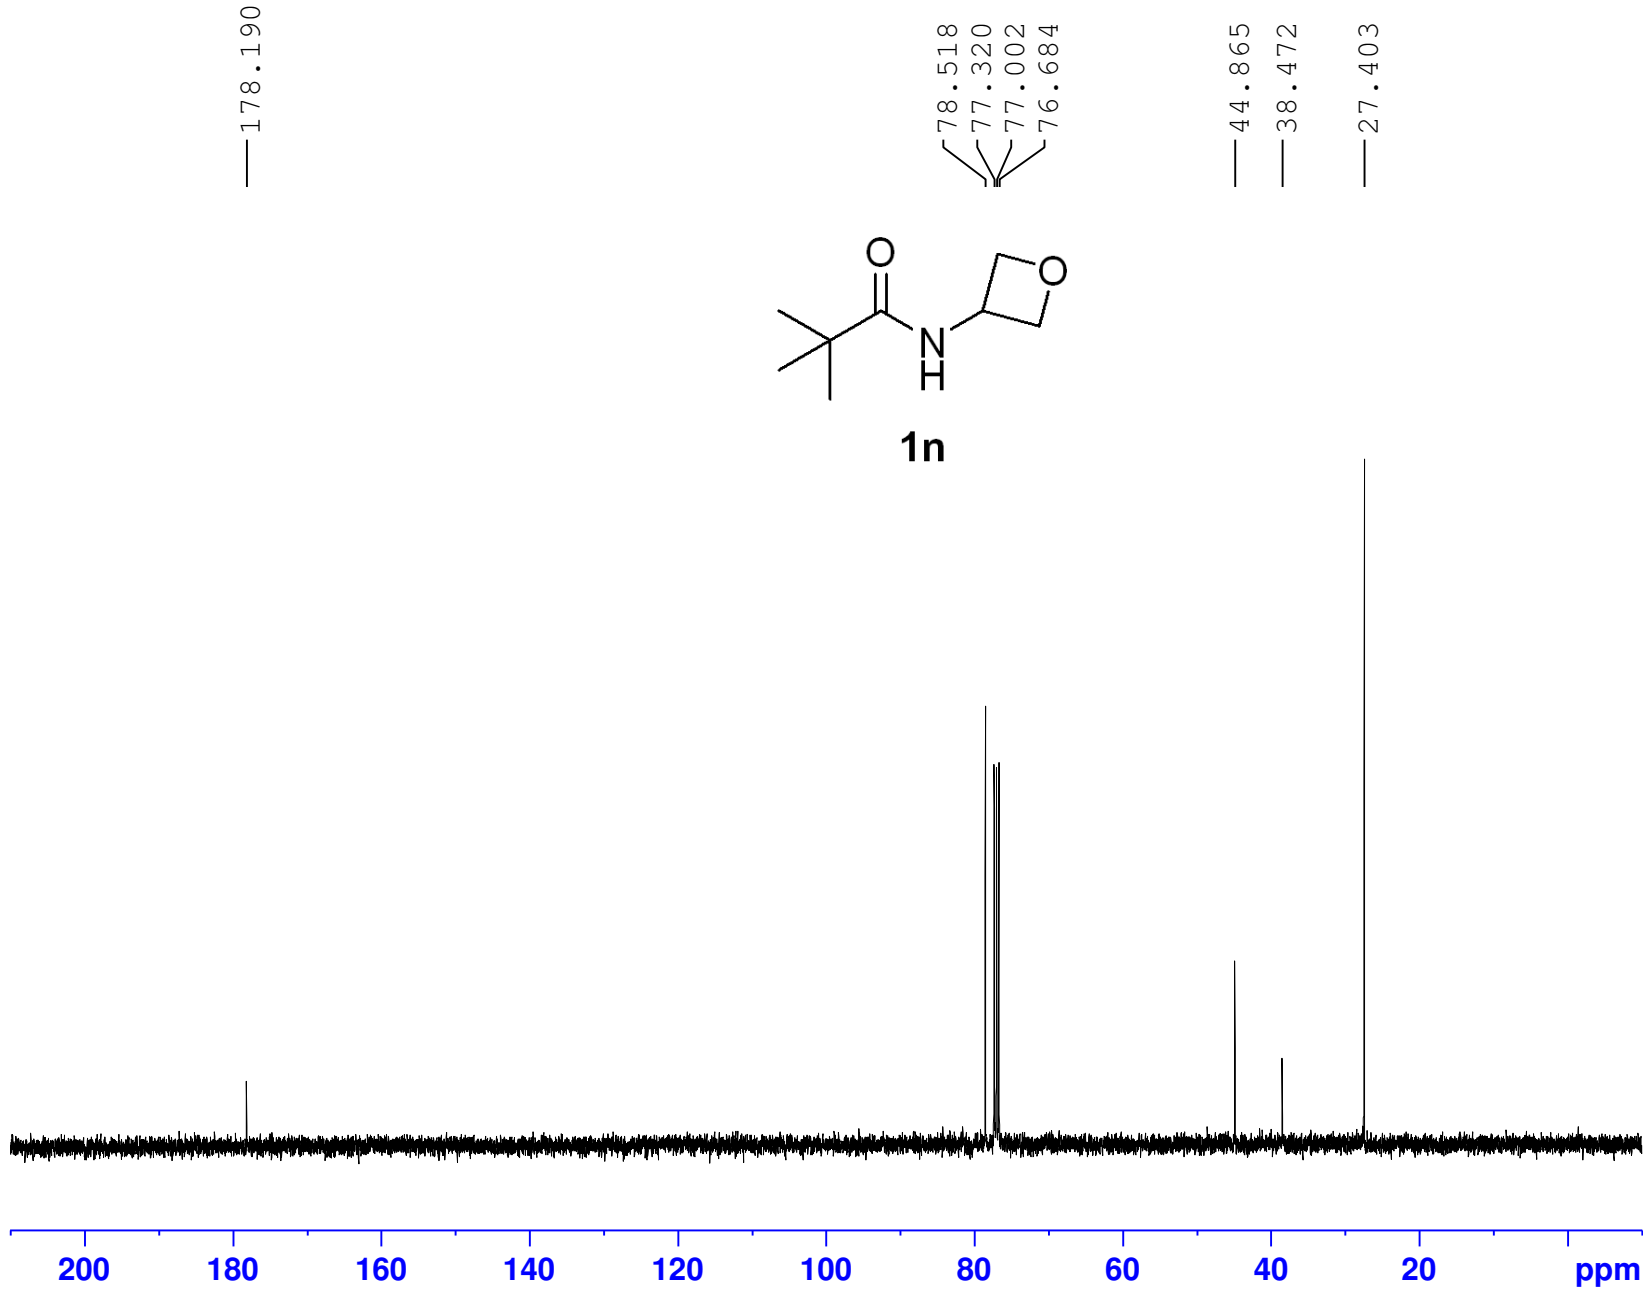

Current Data Parameters  
NAME YW-1780-carbon  
EXPNO 1  
PROCNO 1

F2 - Acquisition Parameters  
Date\_ 20160813  
Time 8.52  
INSTRUM spect  
PROBHD 5 mm PABBO BB/  
PULPROG zgpg30  
TD 65536  
SOLVENT CDCl3  
NS 39  
DS 0  
SWH 24038.461 Hz  
FIDRES 0.366798 Hz  
AQ 1.3631488 sec  
RG 196.92  
DW 20.800 usec  
DE 6.50 usec  
TE 303.3 K  
D1 2.00000000 sec  
D11 0.03000000 sec  
TD0 1

=====  
CHANNEL f1  
SFO1 100.6228298 MHz  
NUC1 13C  
P1 9.70 usec  
PLW1 46.98899841 W

=====  
CHANNEL f2  
SFO2 400.1316005 MHz  
NUC2 1H  
CPDPRG[2] waltz16  
PCPD2 90.00 usec  
PLW2 11.99499989 W  
PLW12 0.34213999 W  
PLW13 0.27713001 W

F2 - Processing parameters  
SI 32768  
SF 100.6127737 MHz  
WDW EM  
SSB 0  
LB 1.00 Hz  
GB 0  
PC 1.40

7.665  
7.626  
7.498  
7.489  
7.485  
7.481  
7.475  
7.359  
7.351  
7.344  
7.260  
6.608  
6.470  
6.431  
5.230  
5.214  
5.196  
5.180  
5.162  
4.998  
4.980  
4.962  
4.594  
4.578  
4.561

— 1.843

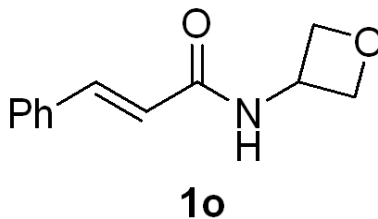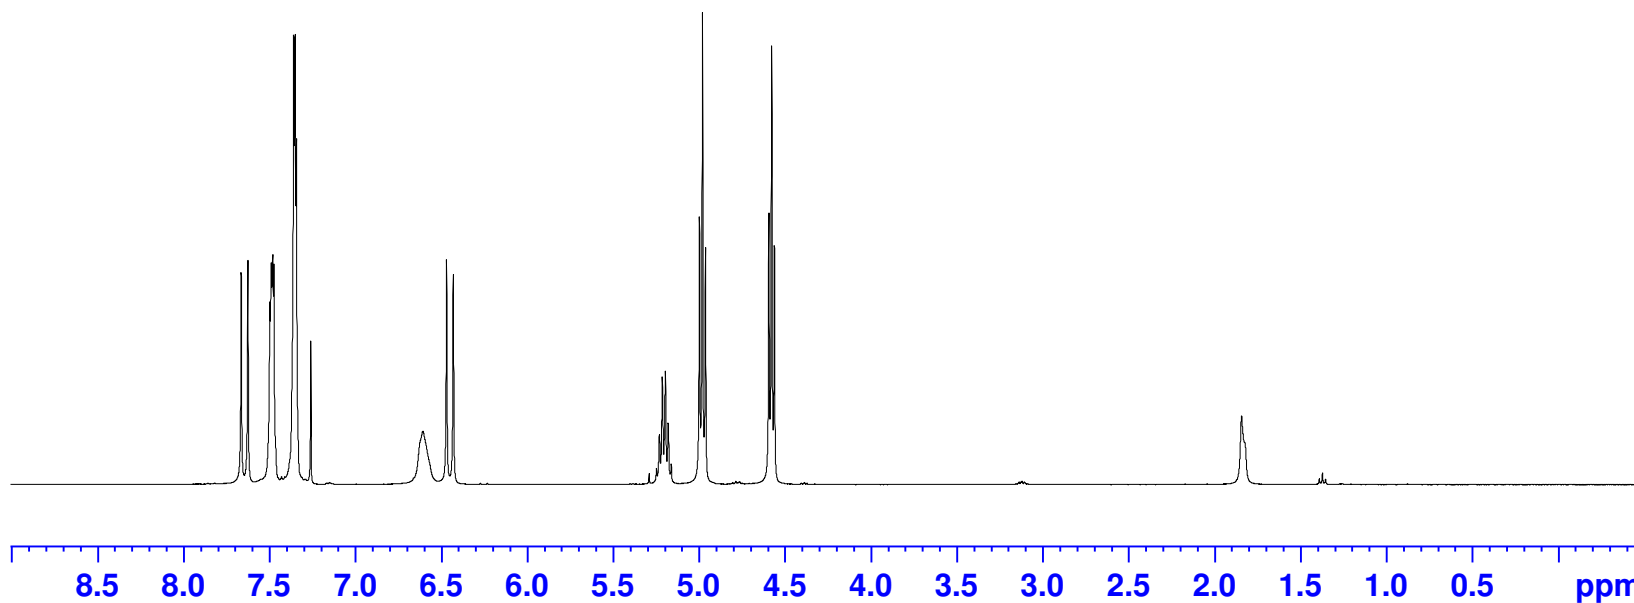

Current Data Parameters  
NAME YW-1905  
EXPNO 1  
PROCNO 1

F2 - Acquisition Parameters  
Date\_ 20160809  
Time 15.16  
INSTRUM spect  
PROBHD 5 mm PABBO BB/  
PULPROG zg30  
TD 65536  
SOLVENT CDC13  
NS 16  
DS 0  
SWH 8012.820 Hz  
FIDRES 0.122266 Hz  
AQ 4.0894465 sec  
RG 88.84  
DW 62.400 usec  
DE 6.50 usec  
TE 298.7 K  
D1 1.00000000 sec  
TD0 1

==== CHANNEL f1 =====  
SFO1 400.1324710 MHz  
NUC1 1H  
P1 14.50 usec  
PLW1 11.99499989 W

F2 - Processing parameters  
SI 65536  
SF 400.1300093 MHz  
WDW EM  
SSB 0  
LB 0.30 Hz  
GB 0  
PC 1.00



— 165.485

— 142.046  
— 134.483  
— 129.942  
— 128.847  
— 127.821  
— 119.744

78.531  
77.320  
77.002  
76.685

— 44.941

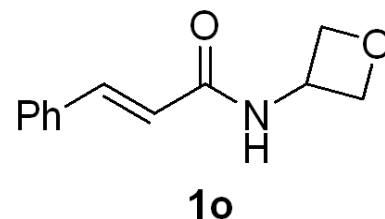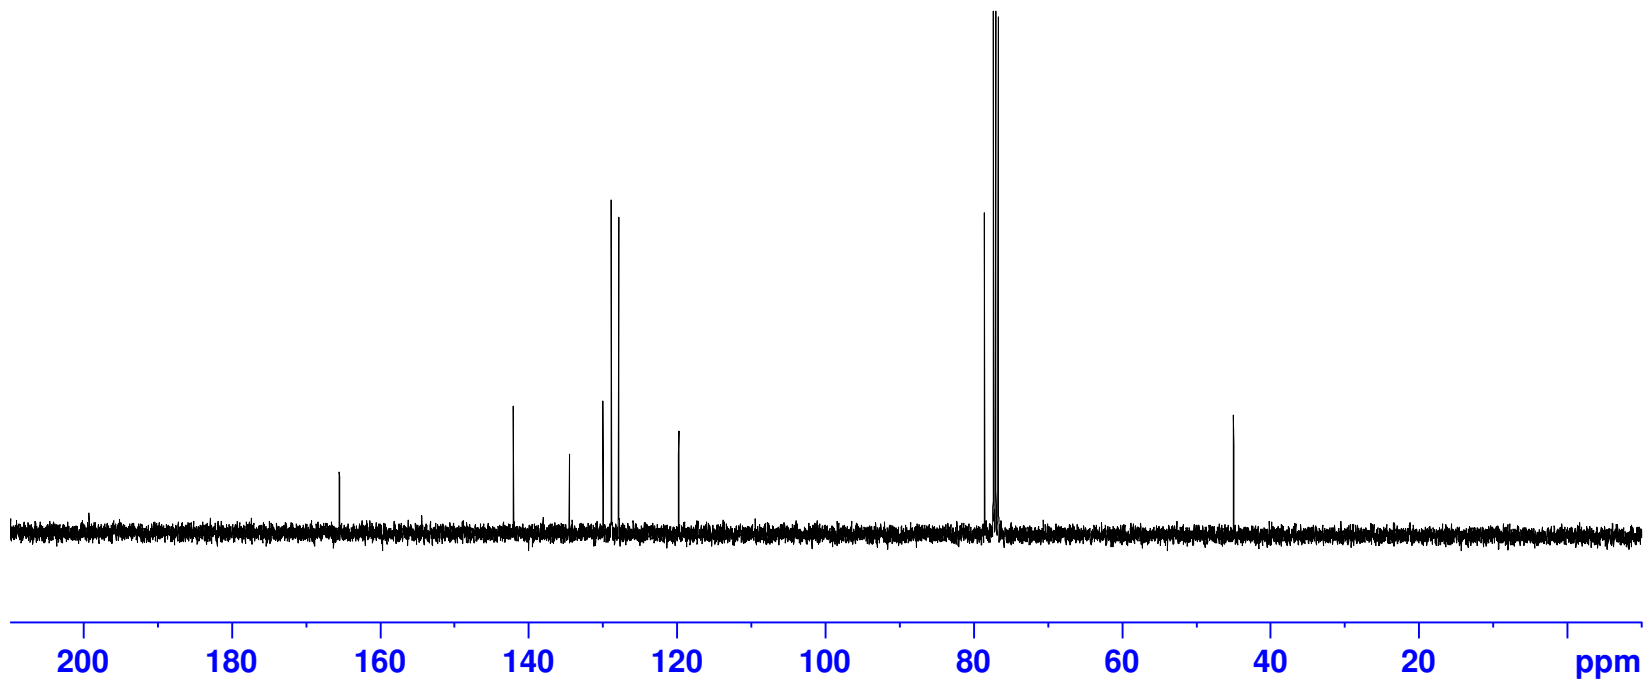

Current Data Parameters  
NAME YW-1905-carbon  
EXPNO 1  
PROCNO 1

F2 - Acquisition Parameters  
Date\_ 20160809  
Time 15.19  
INSTRUM spect  
PROBHD 5 mm PABBO BB/  
PULPROG zgpg30  
TD 65536  
SOLVENT CDC13  
NS 52  
DS 0  
SWH 24038.461 Hz  
FIDRES 0.366798 Hz  
AQ 1.3631488 sec  
RG 196.92  
DW 20.800 usec  
DE 6.50 usec  
TE 299.6 K  
D1 2.00000000 sec  
D11 0.03000000 sec  
TD0 1

==== CHANNEL f1 =====  
SFO1 100.6228298 MHz  
NUC1 13C  
P1 9.70 usec  
PLW1 46.98899841 W

==== CHANNEL f2 =====  
SFO2 400.1316005 MHz  
NUC2 1H  
CPDPRG[2] waltz16  
PCPD2 90.00 usec  
PLW2 11.99499989 W  
PLW12 0.34213999 W  
PLW13 0.27713001 W

F2 - Processing parameters  
SI 32768  
SF 100.6127736 MHz  
WDW EM  
SSB 0  
LB 1.00 Hz  
GB 0  
PC 1.40



Current Data Parameters  
NAME YW-1750  
EXPNO 3  
PROCNO 1

F2 - Acquisition Parameters  
Date\_ 20160813  
Time 8.56  
INSTRUM spect  
PROBHD 5 mm PABBO BB/  
PULPROG zg30  
TD 65536  
SOLVENT CDCl3  
NS 4  
DS 0  
SWH 8012.820 Hz  
FIDRES 0.122266 Hz  
AQ 4.0894465 sec  
RG 54.81  
DW 62.400 usec  
DE 6.50 usec  
TE 302.3 K  
D1 1.00000000 sec  
TD0 1

==== CHANNEL f1 =====  
SFO1 400.1324710 MHz  
NUC1 1H  
P1 14.50 usec  
PLW1 11.99499989 W

F2 - Processing parameters  
SI 65536  
SF 400.1300093 MHz  
WDW EM  
SSB 0  
LB 0.30 Hz  
GB 0  
PC 1.00

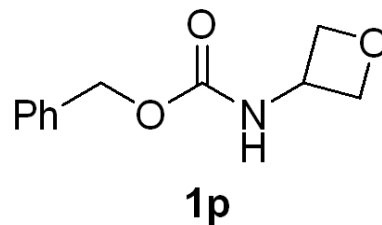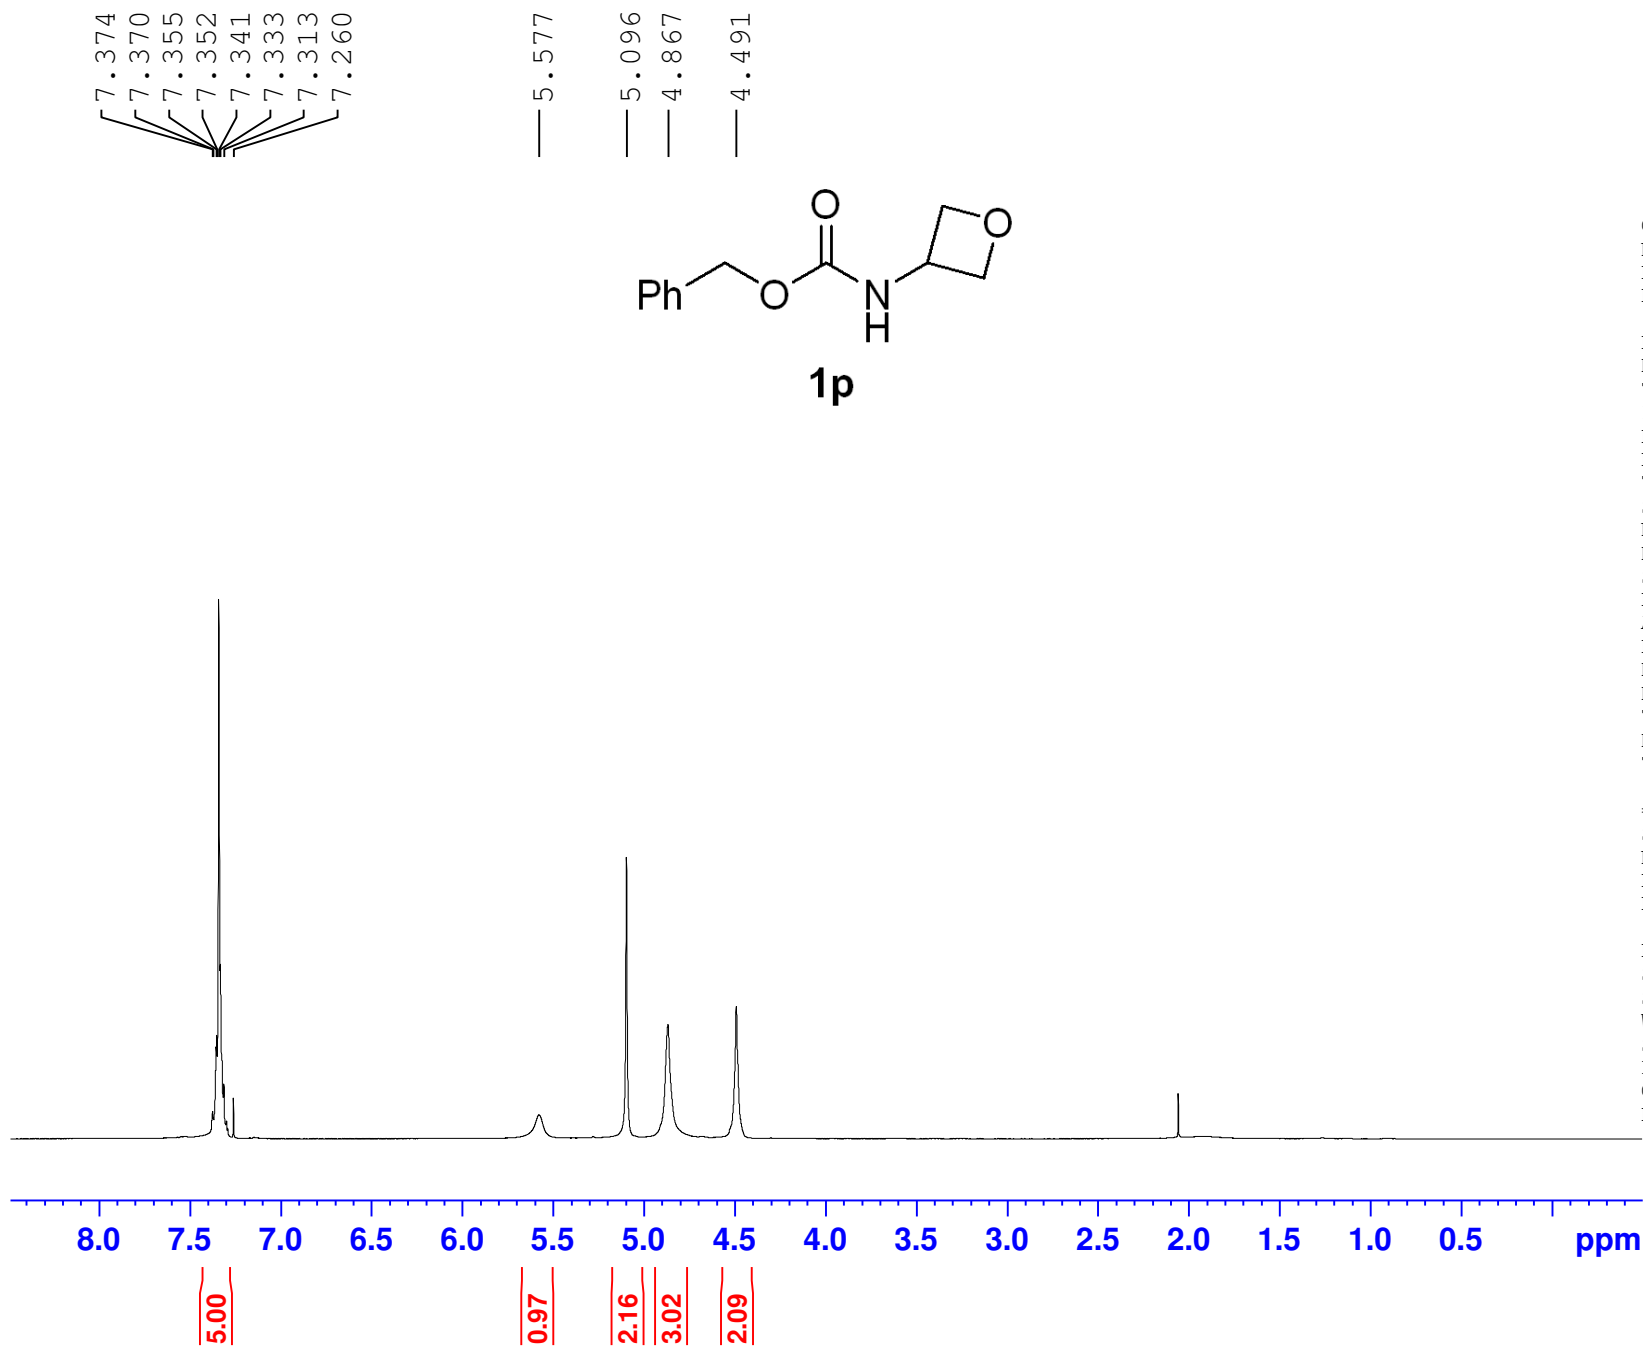



— 155.303  
— 136.062  
— 128.501  
— 128.222  
— 128.084  
— 78.590  
— 77.317  
— 76.999  
— 76.681  
— 66.949  
— 46.077

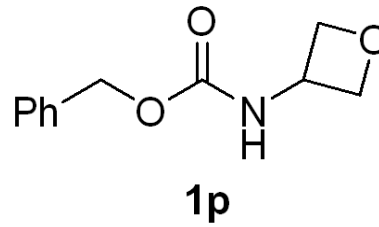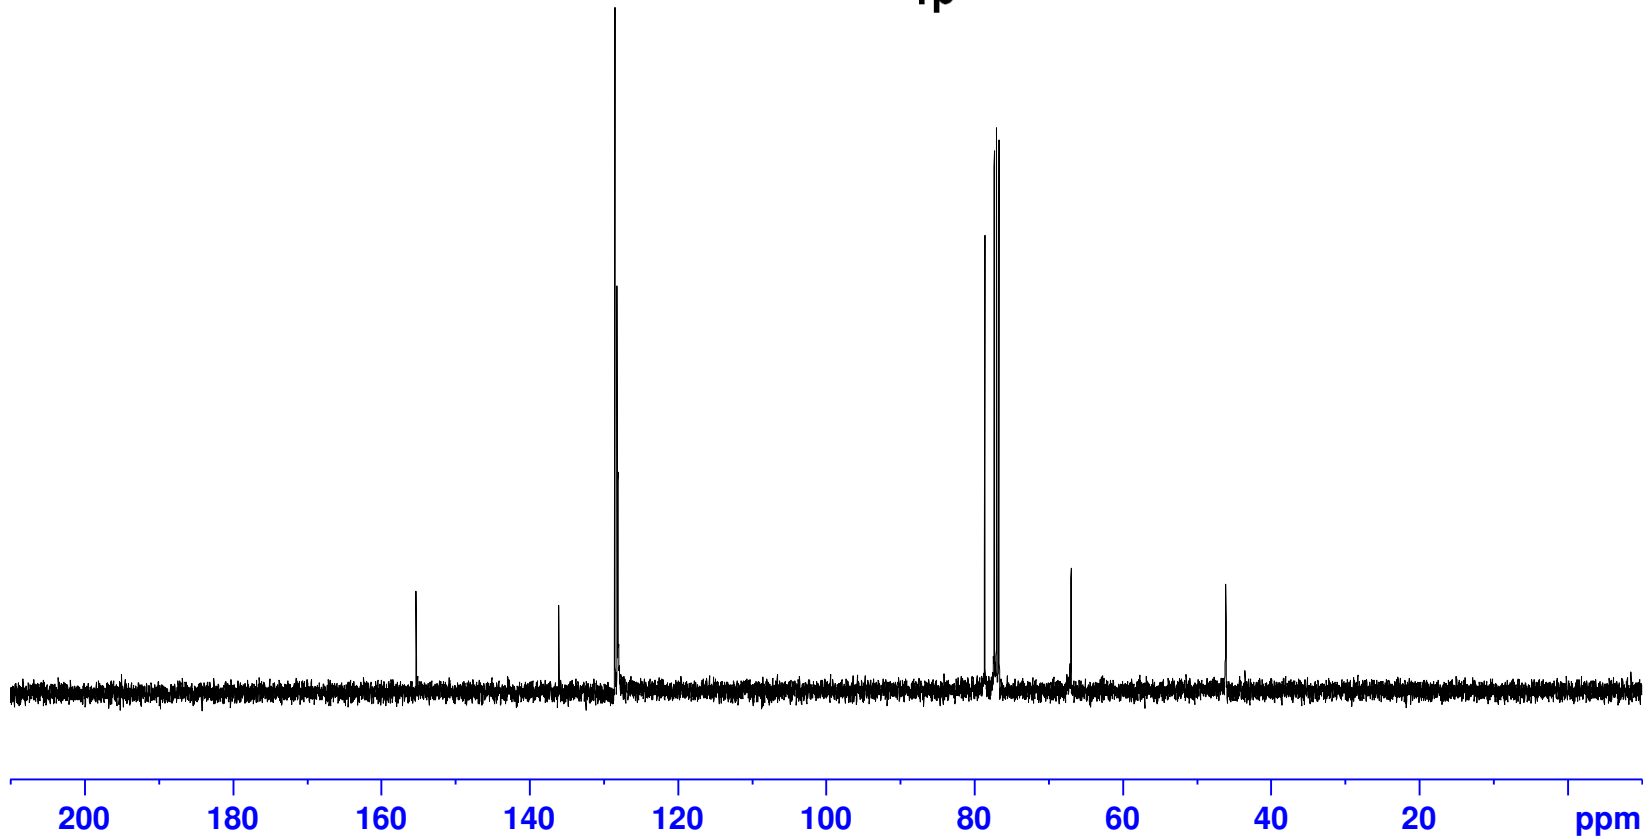

Current Data Parameters  
NAME YW-1750-carbon  
EXPNO 3  
PROCNO 1

F2 - Acquisition Parameters  
Date\_ 20160813  
Time 9.01  
INSTRUM spect  
PROBHD 5 mm PABBO BB/  
PULPROG zgpg30  
TD 65536  
SOLVENT CDC13  
NS 45  
DS 0  
SWH 24038.461 Hz  
FIDRES 0.366798 Hz  
AQ 1.3631488 sec  
RG 196.92  
DW 20.800 usec  
DE 6.50 usec  
TE 302.8 K  
D1 2.00000000 sec  
D11 0.03000000 sec  
TD0 1

==== CHANNEL f1 =====  
SFO1 100.6228298 MHz  
NUC1 13C  
P1 9.70 usec  
PLW1 46.98899841 W

==== CHANNEL f2 =====  
SFO2 400.1316005 MHz  
NUC2 1H  
CPDPRG[2] waltz16  
PCPD2 90.00 usec  
PLW2 11.99499989 W  
PLW12 0.34213999 W  
PLW13 0.27713001 W

F2 - Processing parameters  
SI 32768  
SF 100.6127773 MHz  
WDW EM  
SSB 0  
LB 1.00 Hz  
GB 0  
PC 1.40



Current Data Parameters  
NAME YW-1688  
EXPNO 1  
PROCNO 1

F2 - Acquisition Parameters  
Date\_ 20160319  
Time 20.16  
INSTRUM spect  
PROBHD 5 mm PABBO BB/  
PULPROG zg30  
TD 65536  
SOLVENT CDCl3  
NS 11  
DS 0  
SWH 8012.820 Hz  
FIDRES 0.122266 Hz  
AQ 4.0894465 sec  
RG 112.31  
DW 62.400 usec  
DE 6.50 usec  
TE 298.0 K  
D1 1.00000000 sec  
TD0 1

==== CHANNEL f1 =====  
SFO1 400.1324710 MHz  
NUC1 1H  
P1 14.50 usec  
PLW1 11.99499989 W

F2 - Processing parameters  
SI 65536  
SF 400.1300095 MHz  
WDW EM  
SSB 0  
LB 0.30 Hz  
GB 0  
PC 1.00

7.260  
7.251  
7.247  
7.233  
7.230  
7.227  
7.213  
7.209  
6.694  
6.688  
6.685  
6.673  
6.669  
6.668  
6.650  
6.647  
6.600  
5.542  
5.219  
5.204  
5.202  
5.186  
5.168  
5.152  
5.134  
5.014  
4.997  
4.979  
4.606  
4.590  
4.574

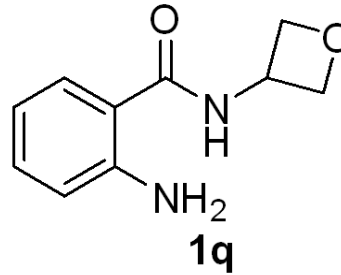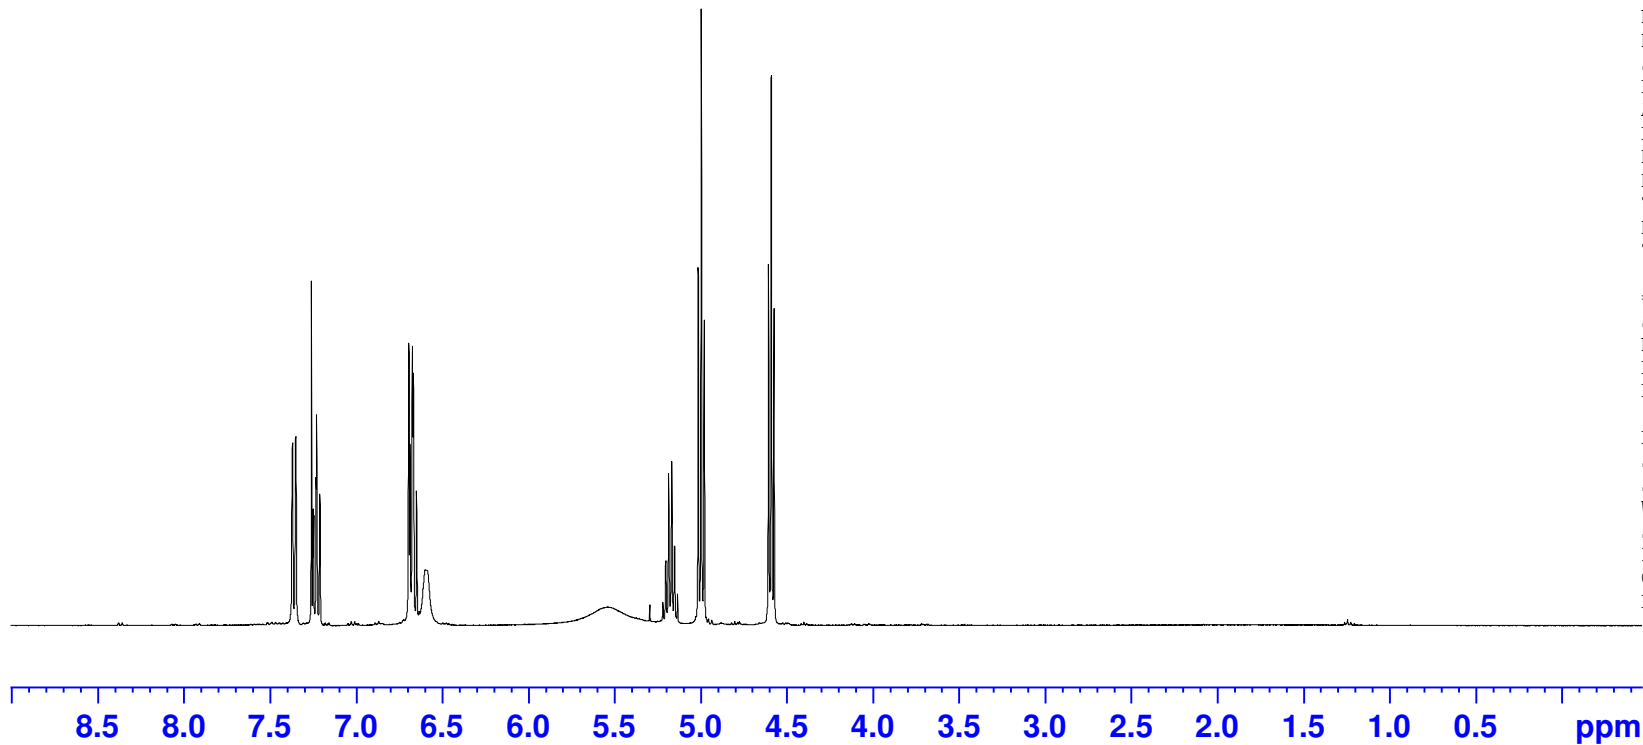

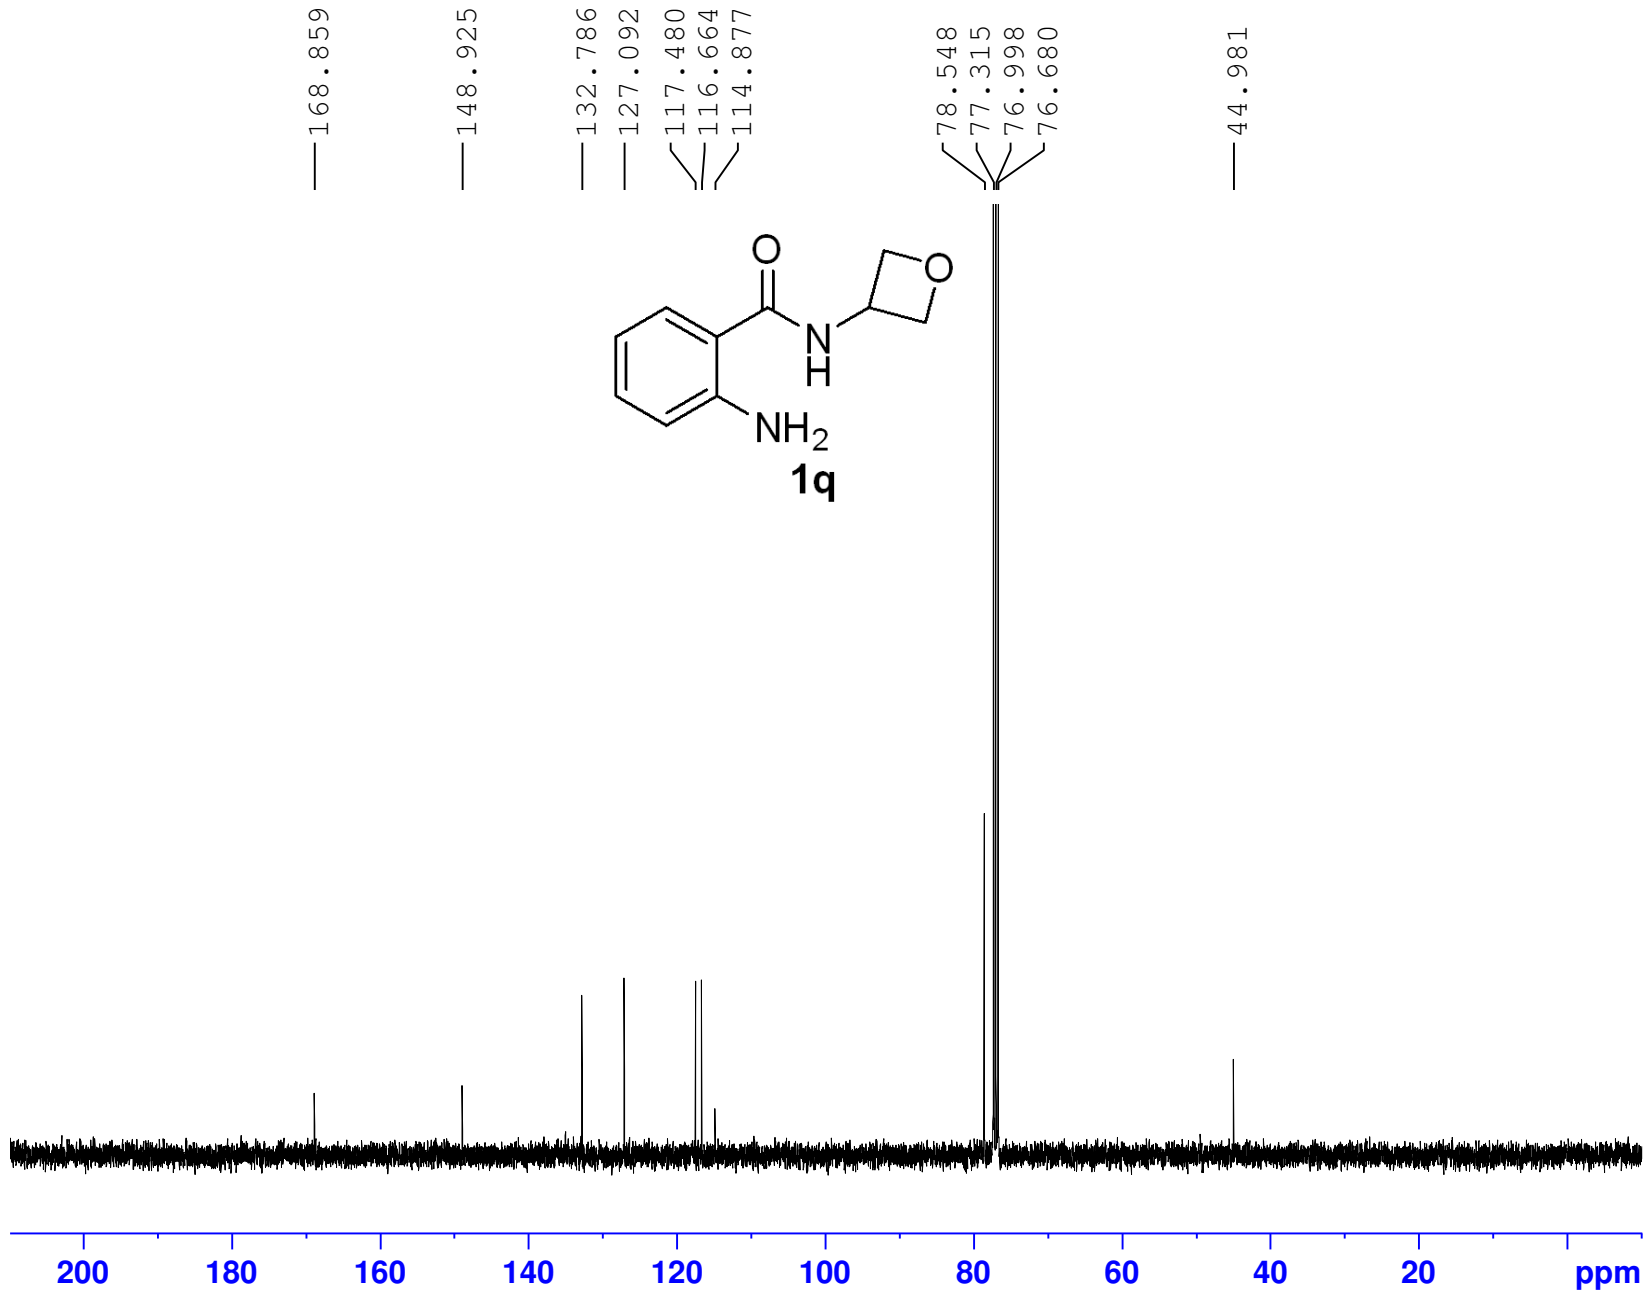

Current Data Parameters  
NAME YW-1688-carbon  
EXPNO 1  
PROCNO 1

F2 - Acquisition Parameters  
Date\_ 20160319  
Time 20.20  
INSTRUM spect  
PROBHD 5 mm PABBO BB/  
PULPROG zgpg30  
TD 65536  
SOLVENT CDC13  
NS 63  
DS 0  
SWH 24038.461 Hz  
FIDRES 0.366798 Hz  
AQ 1.3631488 sec  
RG 196.92  
DW 20.800 usec  
DE 6.50 usec  
TE 298.8 K  
D1 2.00000000 sec  
D11 0.03000000 sec  
TD0 1

==== CHANNEL f1 =====  
SFO1 100.6228298 MHz  
NUC1 13C  
P1 9.70 usec  
PLW1 46.98899841 W

==== CHANNEL f2 =====  
SFO2 400.1316005 MHz  
NUC2 1H  
CPDPRG[2] waltz16  
PCPD2 90.00 usec  
PLW2 11.99499989 W  
PLW12 0.34213999 W  
PLW13 0.27713001 W

F2 - Processing parameters  
SI 32768  
SF 100.6127721 MHz  
WDW EM  
SSB 0  
LB 1.00 Hz  
GB 0  
PC 1.40

11.159  
7.746  
7.743  
7.726  
7.723  
7.685  
7.683  
7.664  
7.662  
7.641  
7.637  
7.625  
7.621  
7.616  
7.501  
7.497  
7.482  
7.479  
7.462  
7.458  
7.308  
7.306  
7.286  
7.285  
7.139  
7.136  
7.120  
7.119  
7.118  
7.117  
7.101  
7.098  
5.078  
5.076  
5.059  
5.057  
5.041  
4.847  
4.829  
4.811  
4.592  
4.575  
4.559  
2.875  
2.342  
2.056  
2.050  
2.045

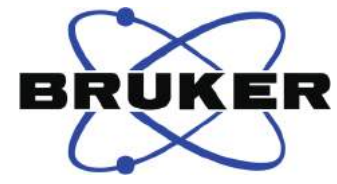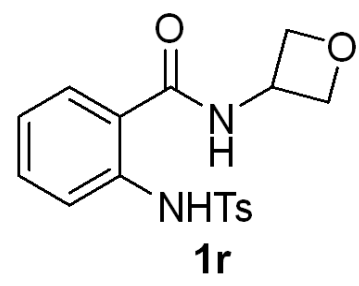

Current Data Parameters  
NAME YW-1701  
EXPNO 2  
PROCNO 1

F2 - Acquisition Parameters  
Date\_ 20160813  
Time 9.31  
INSTRUM spect  
PROBHD 5 mm PABBO BB/  
PULPROG zg30  
TD 65536  
SOLVENT Acetone  
NS 4  
DS 0  
SWH 8012.820 Hz  
FIDRES 0.122266 Hz  
AQ 4.0894465 sec  
RG 49.32  
DW 62.400 usec  
DE 6.50 usec  
TE 300.7 K  
D1 1.00000000 sec  
TD0 1

==== CHANNEL f1 =====  
SFO1 400.1324710 MHz  
NUC1 1H  
P1 14.50 usec  
PLW1 11.99499989 W

F2 - Processing parameters  
SI 65536  
SF 400.1300067 MHz  
WDW EM  
SSB 0  
LB 0.30 Hz  
GB 0  
PC 1.00

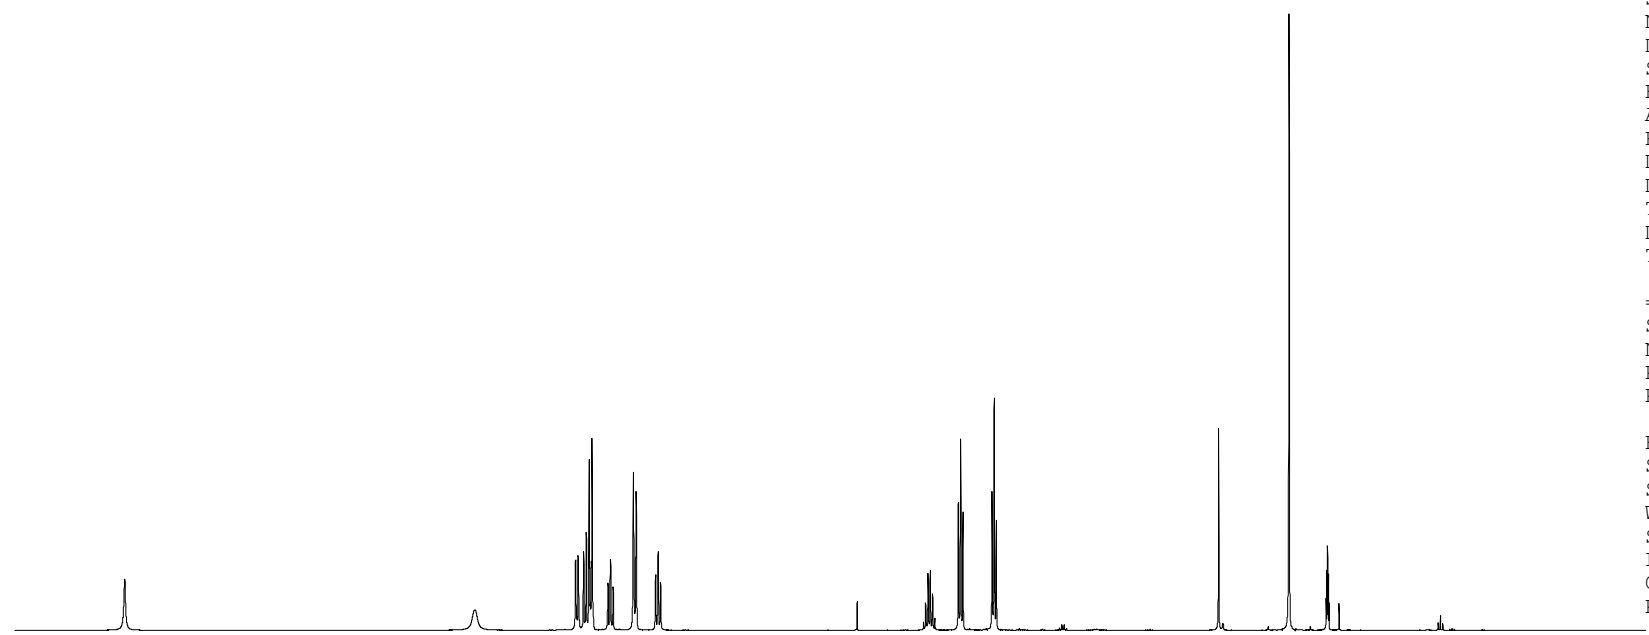

11 10 9 8 7 6 5 4 3 2 1 ppm

0.89 0.98 1.05 2.97 1.02 1.99 1.02 1.00 2.06 2.06 3.08



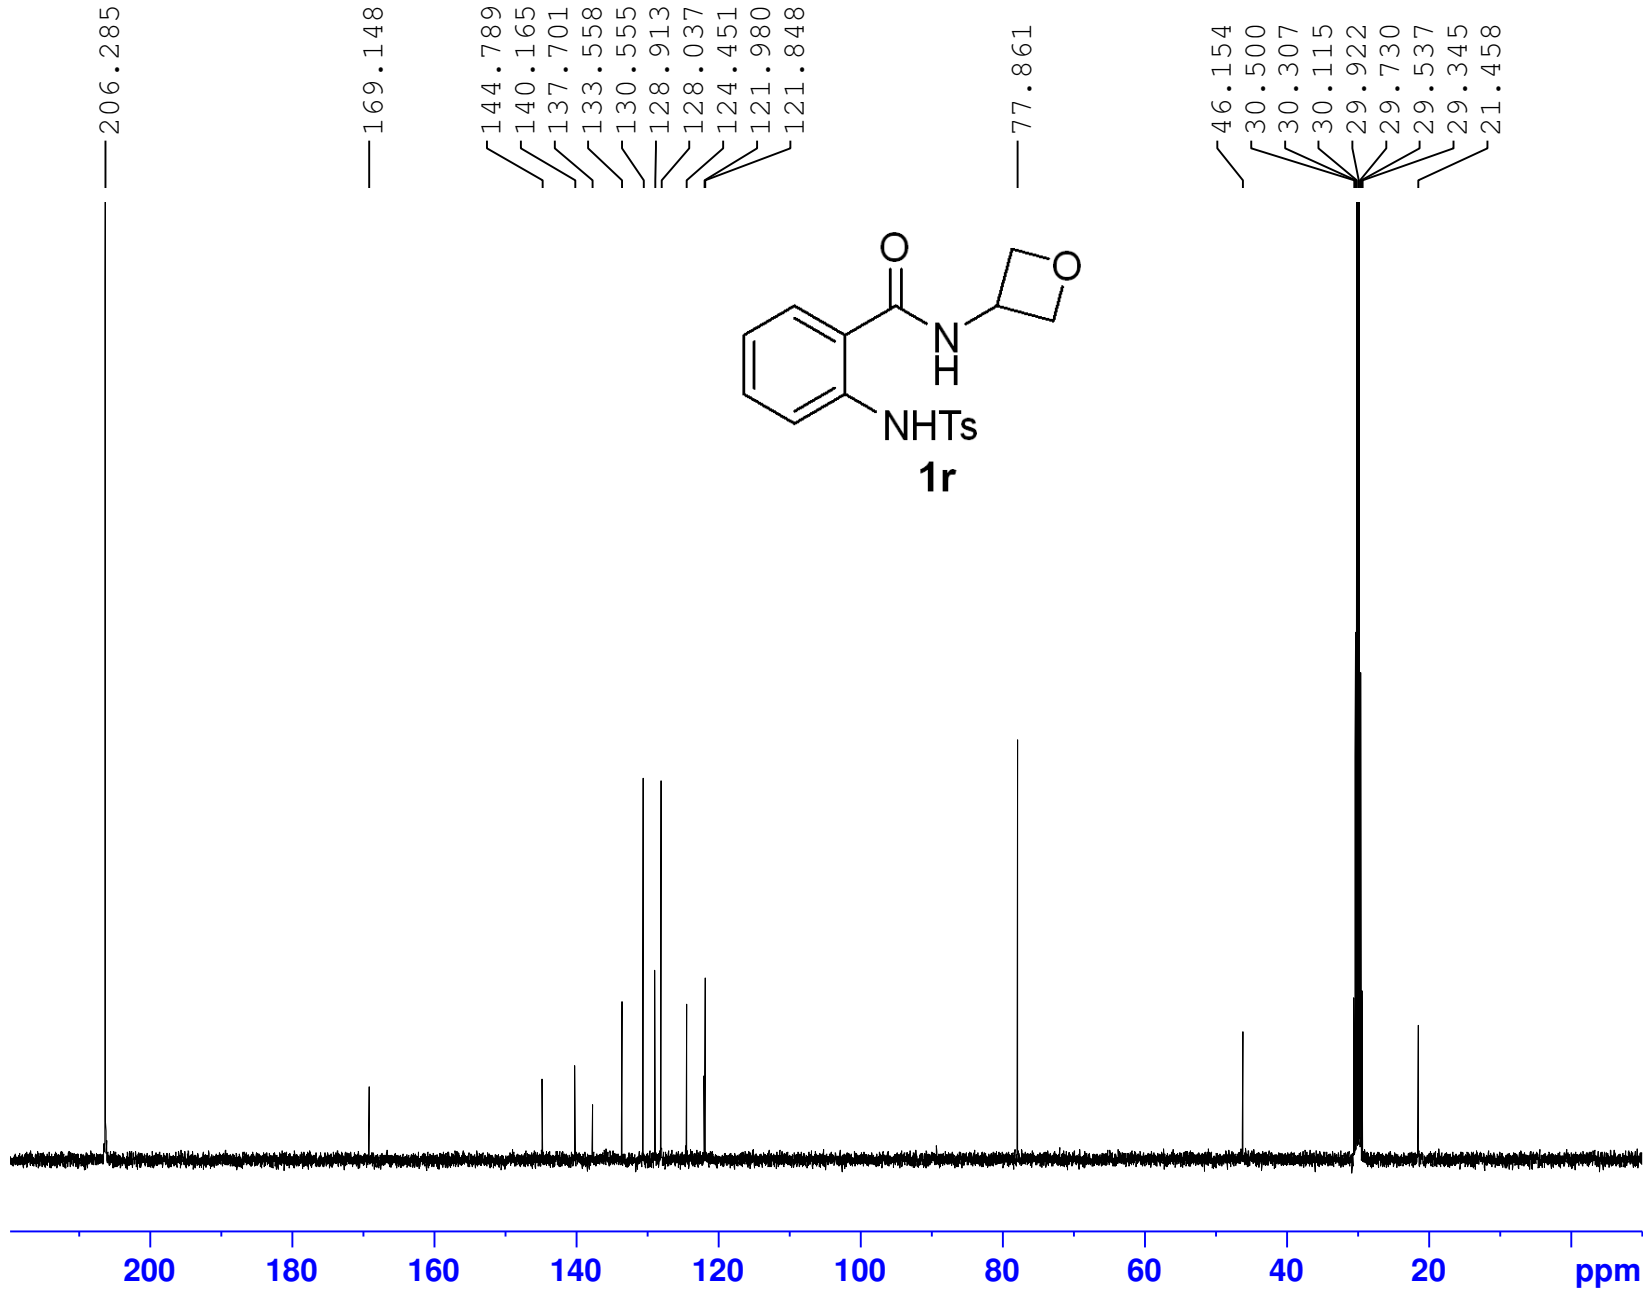

Current Data Parameters  
NAME YW-1701-carbon  
EXPNO 2  
PROCNO 1

F2 - Acquisition Parameters  
Date\_ 20160813  
Time 9.35  
INSTRUM spect  
PROBHD 5 mm PABBO BB/  
PULPROG zgpg30  
TD 65536  
SOLVENT Acetone  
NS 58  
DS 0  
SWH 24038.461 Hz  
FIDRES 0.366798 Hz  
AQ 1.3631488 sec  
RG 196.92  
DW 20.800 usec  
DE 6.50 usec  
TE 301.4 K  
D1 2.0000000 sec  
D11 0.0300000 sec  
TD0 1

==== CHANNEL f1 =====  
SFO1 100.6228298 MHz  
NUC1 13C  
P1 9.70 usec  
PLW1 46.98899841 W

==== CHANNEL f2 =====  
SFO2 400.1316005 MHz  
NUC2 1H  
CPDPRG[2] waltz16  
PCPD2 90.00 usec  
PLW2 11.99499989 W  
PLW12 0.34213999 W  
PLW13 0.27713001 W

F2 - Processing parameters  
SI 32768  
SF 100.6126725 MHz  
WDW EM  
SSB 0  
LB 1.00 Hz  
GB 0  
PC 1.40



9.658  
9.646  
8.036  
8.026  
8.017  
8.007  
7.666  
7.648  
7.635  
7.617  
7.597  
7.578  
7.526  
7.519  
7.507  
7.500  
7.489  
7.481  
7.420  
7.401  
7.382  
7.260  
7.070  
7.051  
7.034  
7.015  
4.667  
4.649  
4.634  
4.614  
4.599  
4.582  
4.564  
4.325  
4.310  
4.295

— 1.874

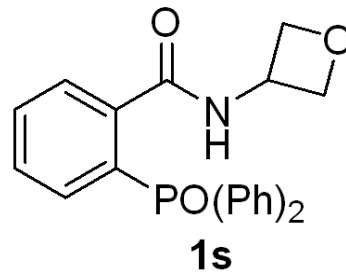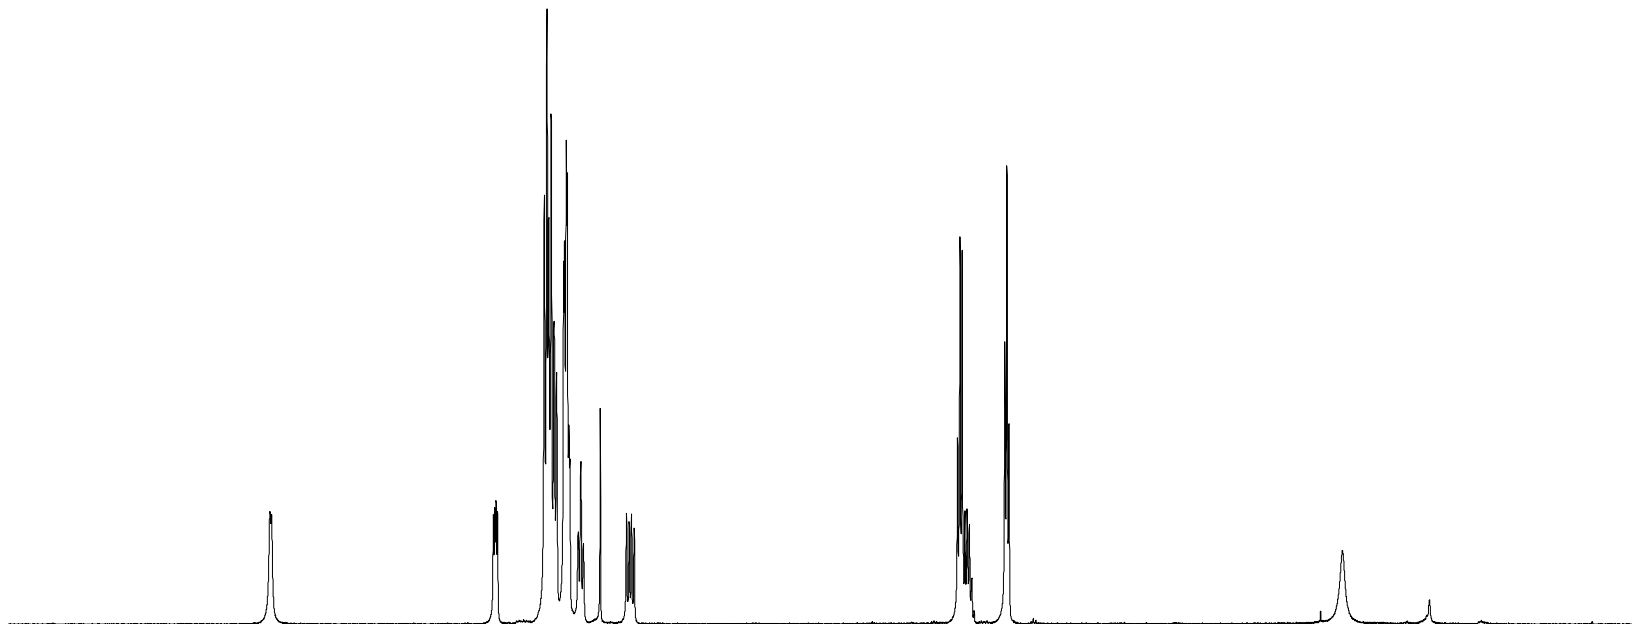

11 10 9 8 7 6 5 4 3 2 1 ppm

1.00  
1.00  
7.24  
4.12  
1.08  
1.03  
3.09  
2.06  
S-98

Current Data Parameters  
NAME cz1-2-6  
EXPNO 1  
PROCNO 1

F2 - Acquisition Parameters  
Date\_ 20170822  
Time 16.00  
INSTRUM spect  
PROBHD 5 mm PABBO BB/  
PULPROG zg30  
TD 65536  
SOLVENT CDC13  
NS 4  
DS 2  
SWH 8012.820 Hz  
FIDRES 0.122266 Hz  
AQ 4.0894465 sec  
RG 187.77  
DW 62.400 usec  
DE 6.50 usec  
TE 296.4 K  
D1 1.00000000 sec  
TD0 1

==== CHANNEL f1 =====  
SFO1 400.1324710 MHz  
NUC1 1H  
P1 14.50 usec  
PLW1 11.99499989 W

F2 - Processing parameters  
SI 65536  
SF 400.1300101 MHz  
WDW EM  
SSB 0  
LB 0.30 Hz  
GB 0  
PC 1.00

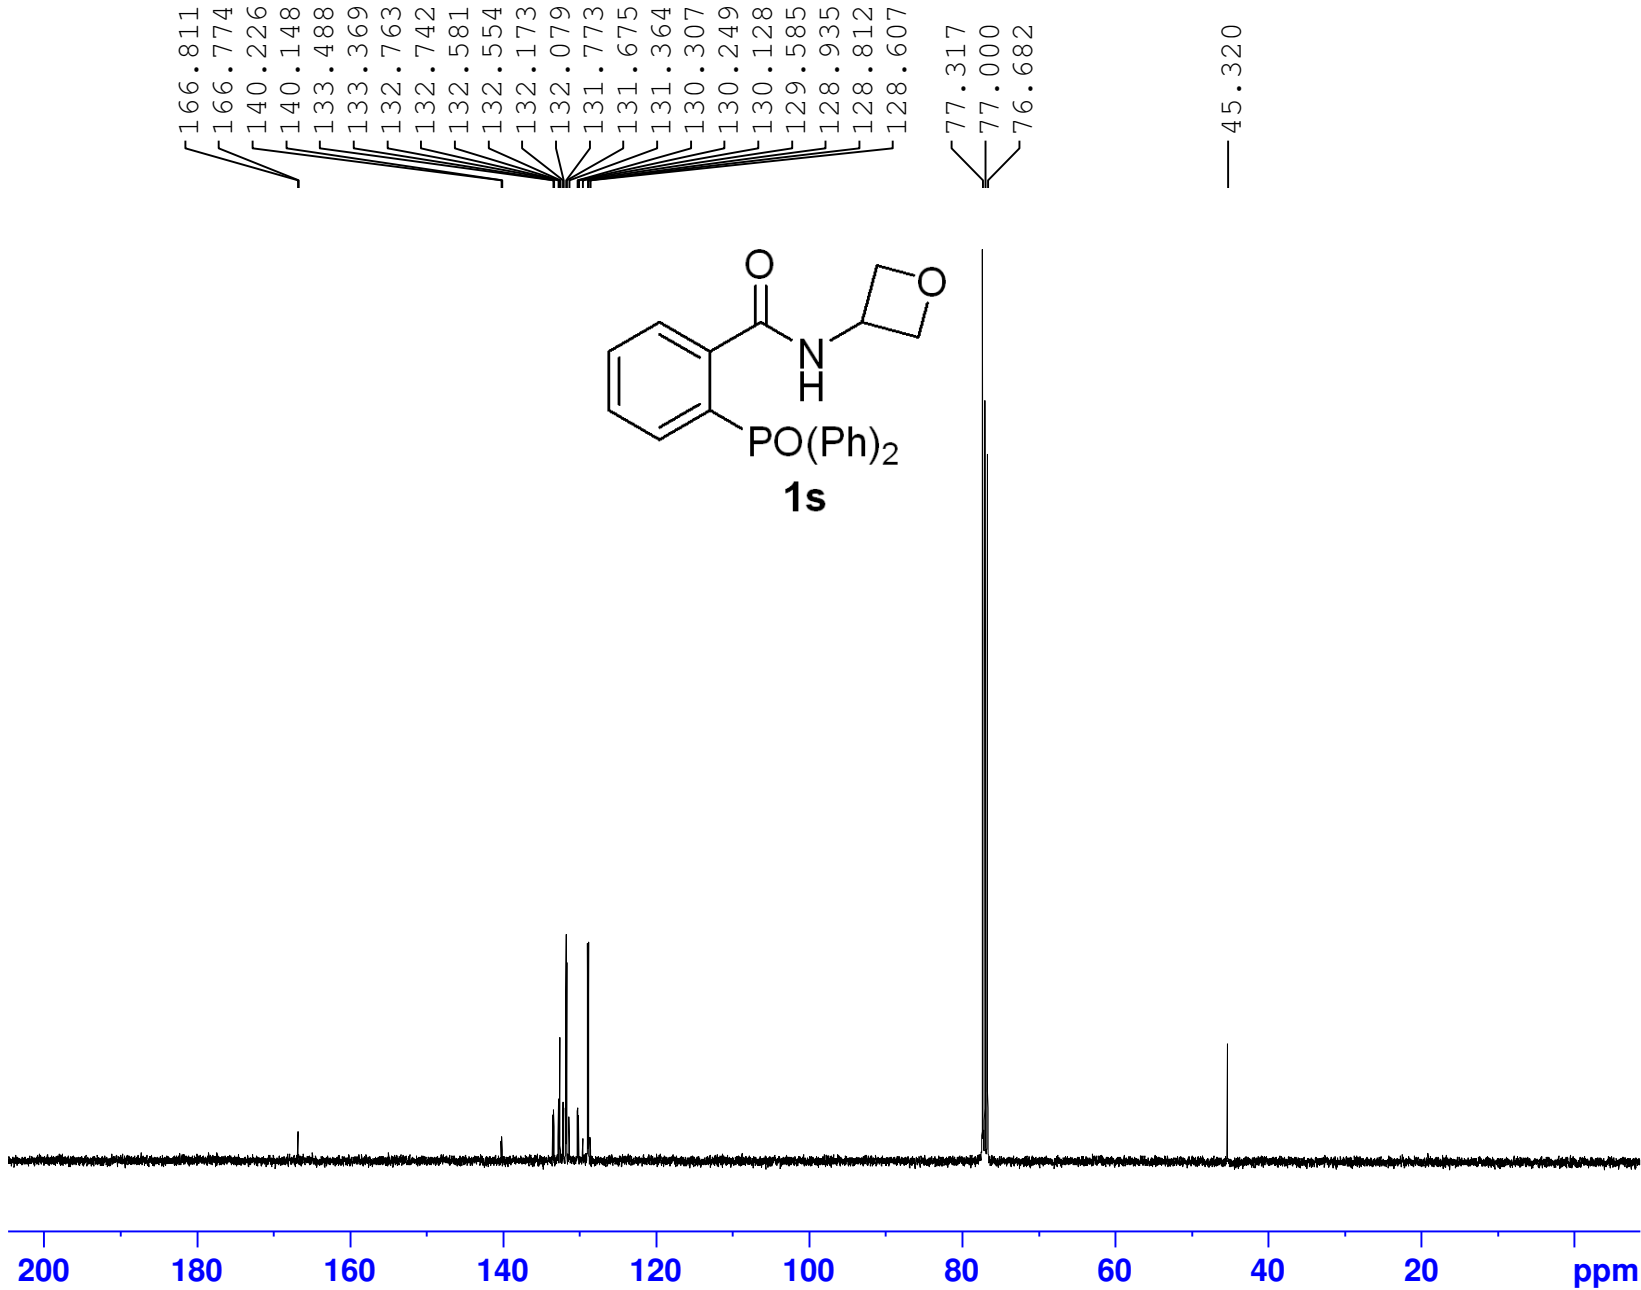

Current Data Parameters  
NAME czl-2-6  
EXPNO 2  
PROCNO 1

F2 - Acquisition Parameters  
Date\_ 20170822  
Time 16.06  
INSTRUM spect  
PROBHD 5 mm PABBO BB/  
PULPROG zgpg30  
TD 65536  
SOLVENT CDC13  
NS 200  
DS 2  
SWH 24038.461 Hz  
FIDRES 0.366798 Hz  
AQ 1.3631488 sec  
RG 196.92  
DW 20.800 usec  
DE 6.50 usec  
TE 297.4 K  
D1 2.00000000 sec  
D11 0.03000000 sec  
TD0 1

==== CHANNEL f1 =====  
SFO1 100.6228298 MHz  
NUC1 13C  
P1 9.70 usec  
PLW1 46.98899841 W

==== CHANNEL f2 =====  
SFO2 400.1316005 MHz  
NUC2 1H  
CPDPRG[2] waltz16  
PCPD2 90.00 usec  
PLW2 11.99499989 W  
PLW12 0.34213999 W  
PLW13 0.27713001 W

F2 - Processing parameters  
SI 32768  
SF 100.6127736 MHz  
WDW EM  
SSB 0  
LB 1.00 Hz  
GB 0  
PC 1.40

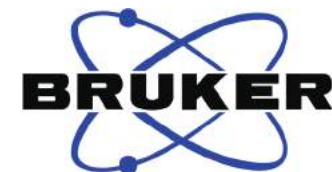

Current Data Parameters  
NAME cz1-2-6  
EXPNO 3  
PROCNO 1

F2 - Acquisition Parameters  
Date\_ 20170822  
Time 16.15  
INSTRUM spect  
PROBHD 5 mm PABBO BB/  
PULPROG zgpg30  
TD 65536  
SOLVENT CDC13  
NS 32  
DS 4  
SWH 64102.563 Hz  
FIDRES 0.978127 Hz  
AQ 0.5111808 sec  
RG 196.92  
DW 7.800 usec  
DE 6.50 usec  
TE 297.1 K  
D1 2.00000000 sec  
D11 0.03000000 sec  
TD0 1

=====  
CHANNEL f1  
SFO1 161.9674942 MHz  
NUC1 31P  
P1 14.70 usec  
PLW1 11.99499989 W

=====  
CHANNEL f2  
SFO2 400.1316005 MHz  
NUC2 1H  
CPDPRG[2] waltz16  
PCPD2 90.00 usec  
PLW2 11.99499989 W  
PLW12 0.34213999 W  
PLW13 0.27713001 W

F2 - Processing parameters  
SI 32768  
SF 161.9755930 MHz  
WDW EM  
SSB 0  
LB 1.00 Hz  
GB 0  
PC 1.40

36.51

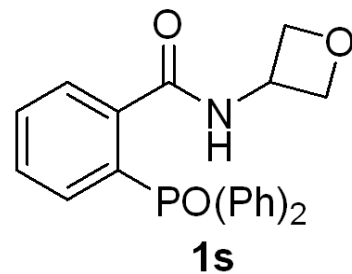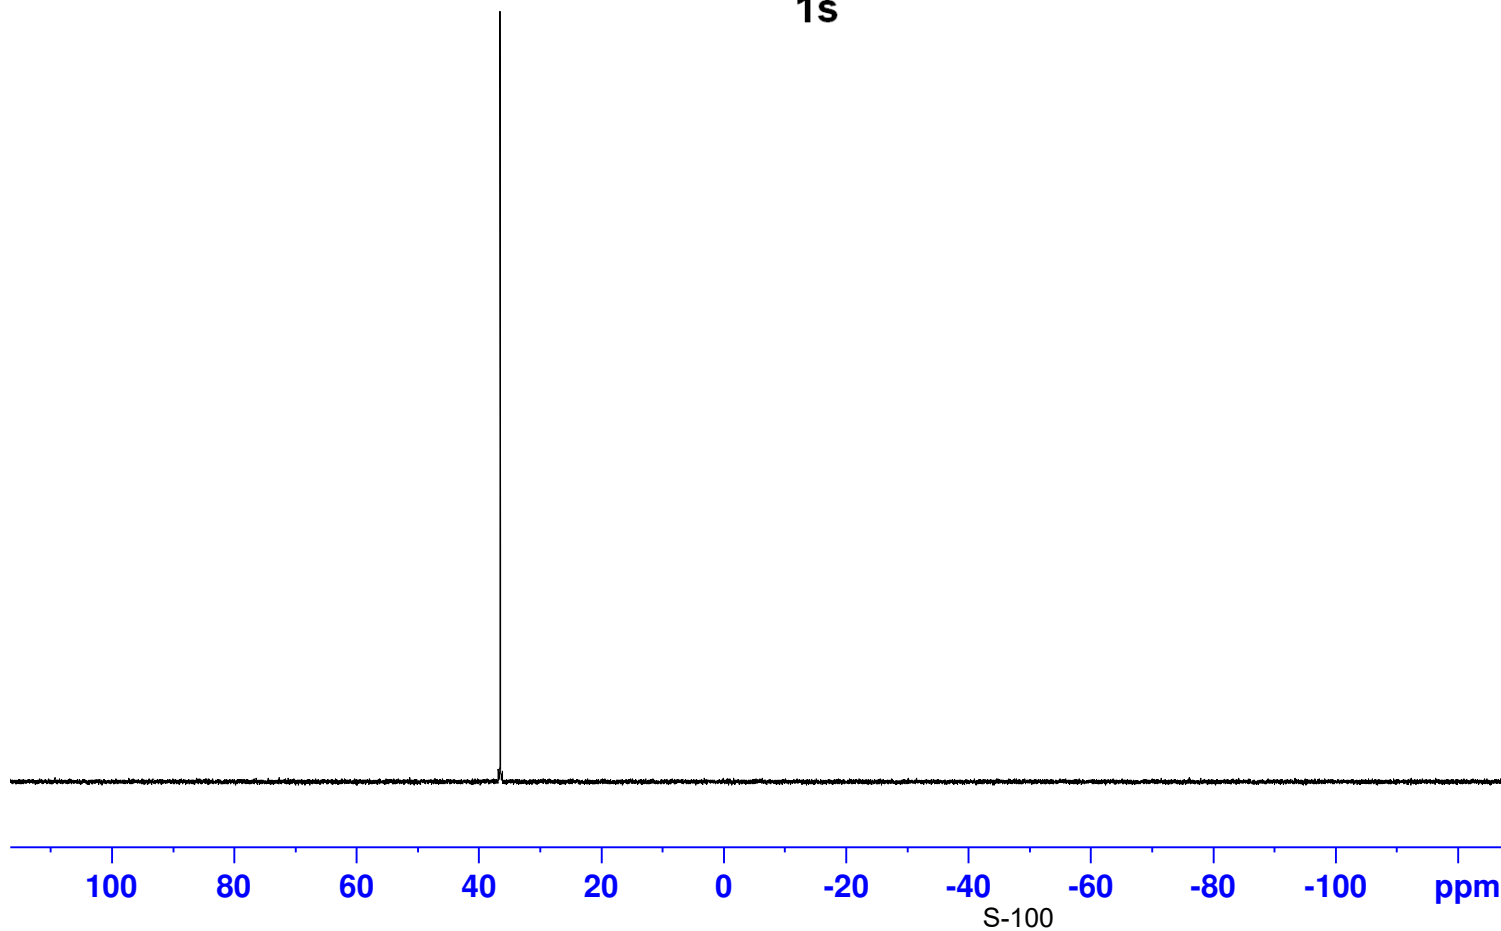

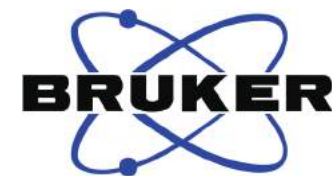

Current Data Parameters  
NAME YW-1668  
EXPNO 1  
PROCNO 1

F2 - Acquisition Parameters  
Date\_ 20160319  
Time 20.07  
INSTRUM spect  
PROBHD 5 mm PABBO BB/  
PULPROG zg30  
TD 65536  
SOLVENT CDCl3  
NS 8  
DS 0  
SWH 8012.820 Hz  
FIDRES 0.122266 Hz  
AQ 4.0894465 sec  
RG 103.52  
DW 62.400 usec  
DE 6.50 usec  
TE 297.9 K  
D1 1.00000000 sec  
TD0 1

==== CHANNEL f1 =====  
SFO1 400.1324710 MHz  
NUC1 1H  
P1 14.50 usec  
PLW1 11.99499989 W

F2 - Processing parameters  
SI 65536  
SF 400.1300094 MHz  
WDW EM  
SSB 0  
LB 0.30 Hz  
GB 0  
PC 1.00

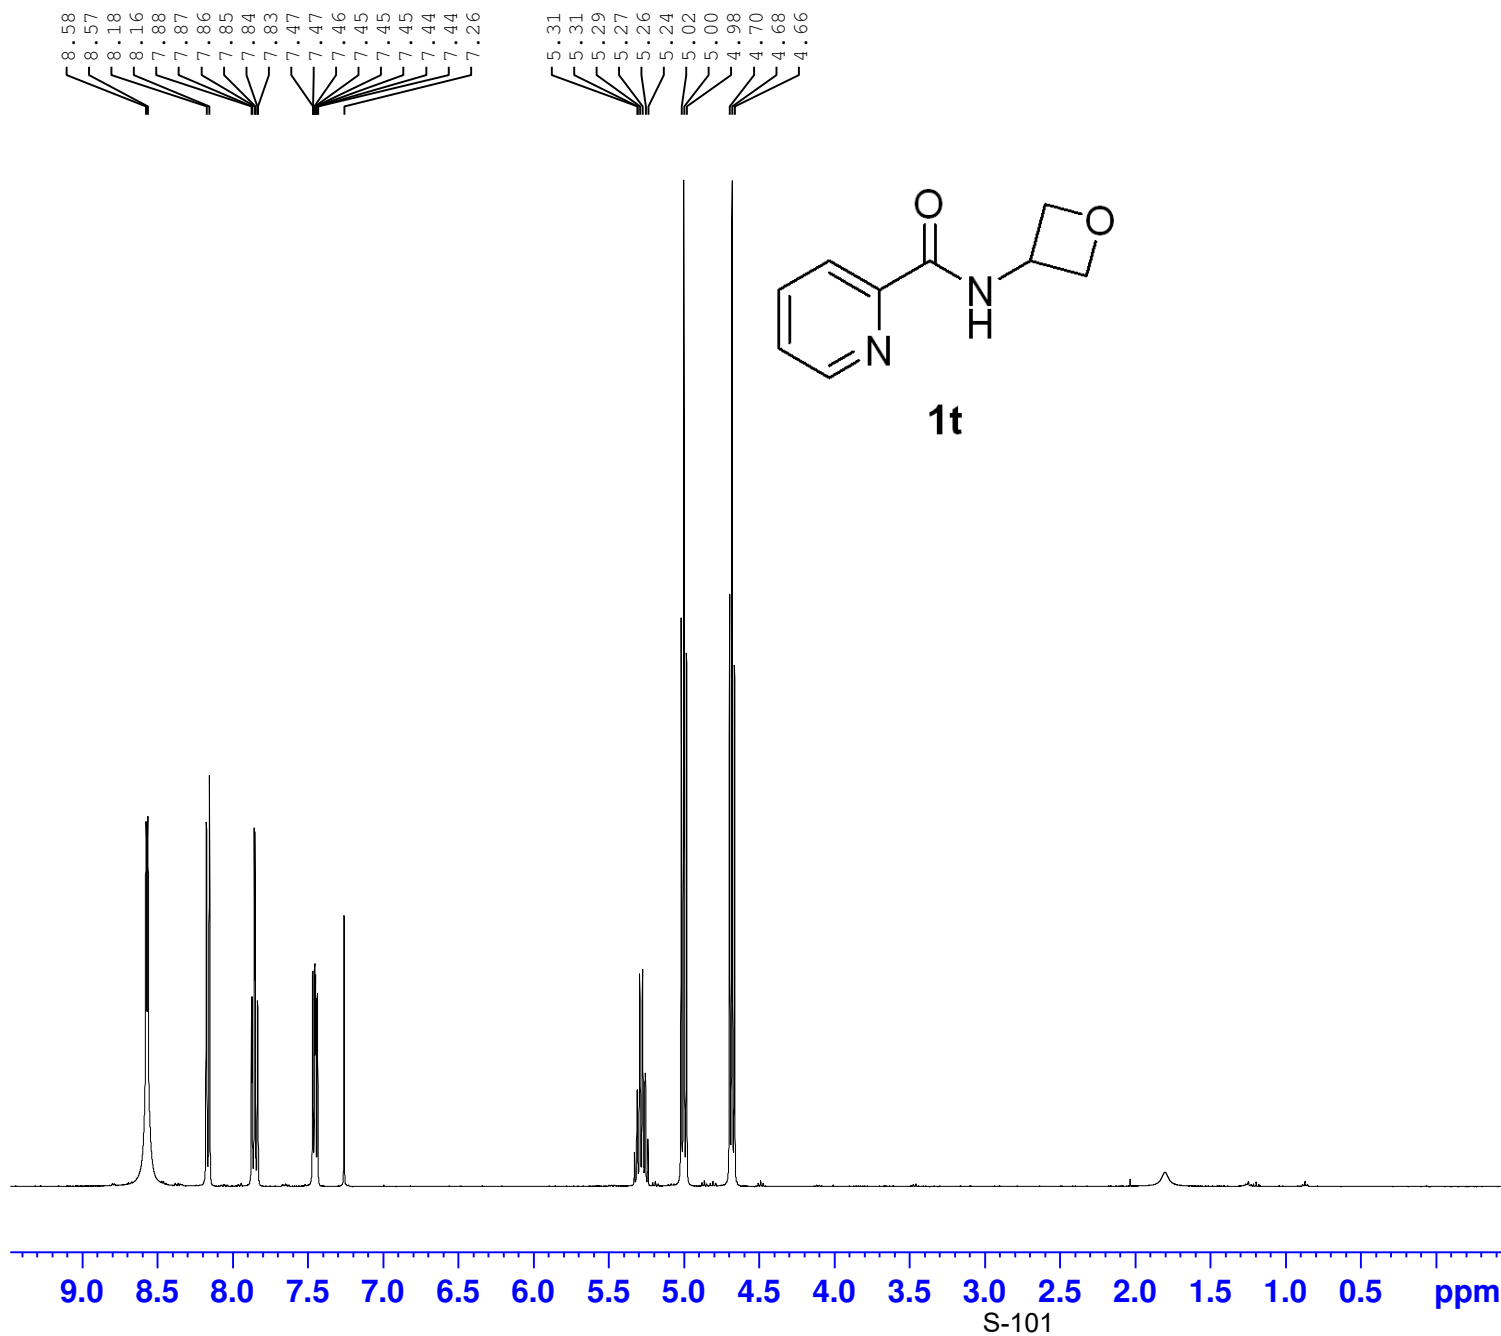



—168.859  
—148.925  
—132.786  
—127.092  
117.480  
116.664  
114.877  
78.548  
77.315  
76.998  
76.680  
—44.981

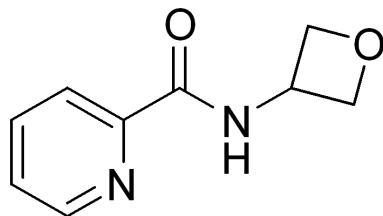

**1t**

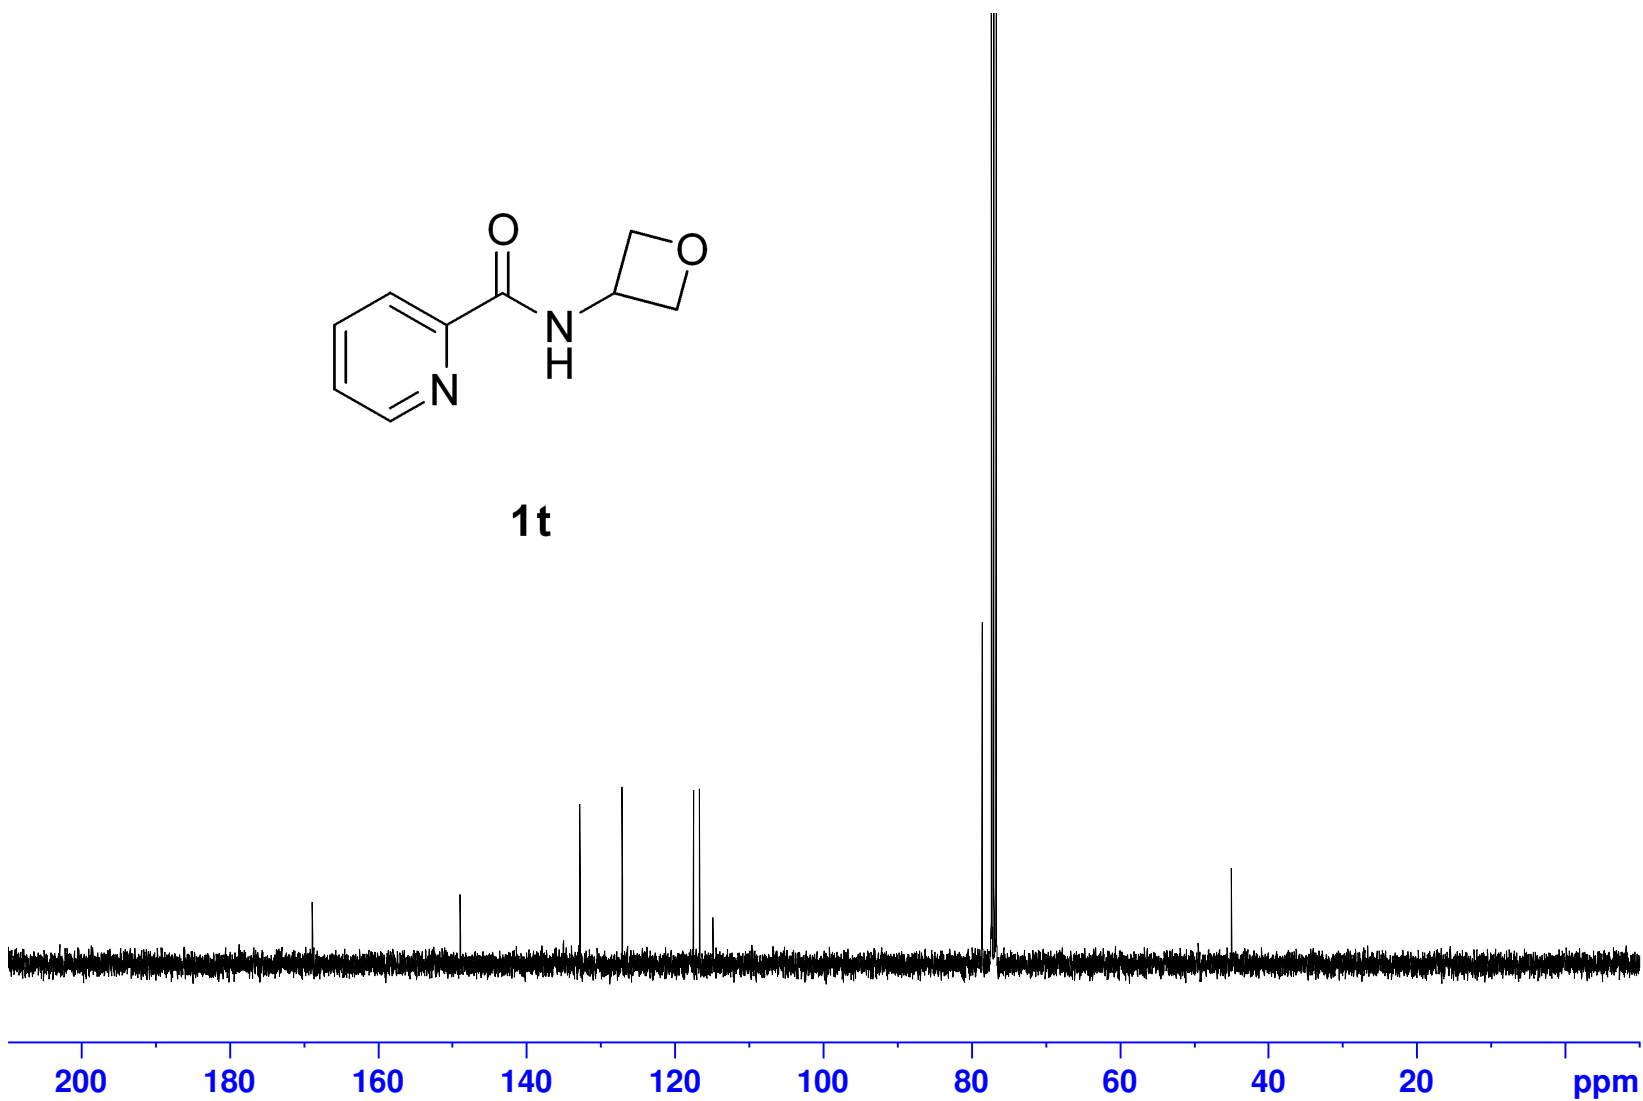

Current Data Parameters  
NAME YW-1688-carbon  
EXPNO 1  
PROCNO 1

F2 - Acquisition Parameters  
Date\_ 20160319  
Time 20.20  
INSTRUM spect  
PROBHD 5 mm PABBO BB/  
PULPROG zgpg30  
TD 65536  
SOLVENT CDC13  
NS 63  
DS 0  
SWH 24038.461 Hz  
FIDRES 0.366798 Hz  
AQ 1.3631488 sec  
RG 196.92  
DW 20.800 usec  
DE 6.50 usec  
TE 298.8 K  
D1 2.00000000 sec  
D11 0.03000000 sec  
TD0 1

==== CHANNEL f1 =====  
SFO1 100.6228298 MHz  
NUC1 13C  
P1 9.70 usec  
PLW1 46.98899841 W

==== CHANNEL f2 =====  
SFO2 400.1316005 MHz  
NUC2 1H  
CPDPRG[2] waltz16  
PCPD2 90.00 usec  
PLW2 11.99499989 W  
PLW12 0.34213999 W  
PLW13 0.27713001 W

F2 - Processing parameters  
SI 32768  
SF 100.6127721 MHz  
WDW EM  
SSB 0  
LB 1.00 Hz  
GB 0  
PC 1.40



7.827  
7.809  
7.548  
7.529  
7.512  
7.441  
7.421  
7.402  
7.393  
7.375  
7.355  
7.314  
7.295  
7.277  
7.259  
7.172  
5.114  
5.097  
4.963  
4.946

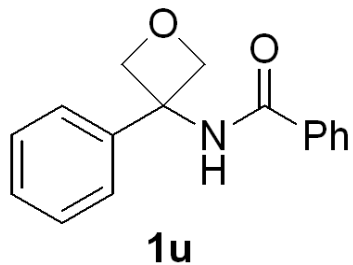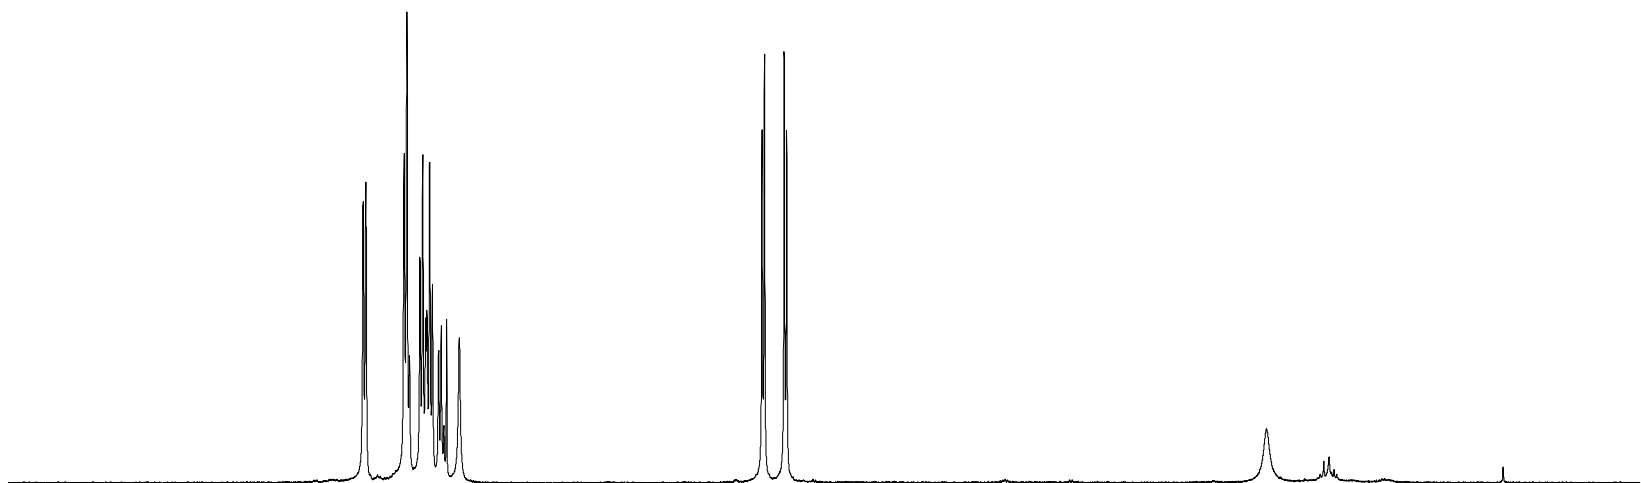

Current Data Parameters  
NAME czl-1-180  
EXPNO 1  
PROCNO 1

F2 - Acquisition Parameters  
Date\_ 20170731  
Time 13.01  
INSTRUM spect  
PROBHD 5 mm PABBO BB/  
PULPROG zg30  
TD 65536  
SOLVENT CDC13  
NS 4  
DS 2  
SWH 8012.820 Hz  
FIDRES 0.122266 Hz  
AQ 4.0894465 sec  
RG 187.77  
DW 62.400 usec  
DE 6.50 usec  
TE 297.4 K  
D1 1.00000000 sec  
TD0 1

==== CHANNEL f1 =====  
SFO1 400.1324710 MHz  
NUC1 1H  
P1 14.50 usec  
PLW1 11.99499989 W

F2 - Processing parameters  
SI 65536  
SF 400.1300105 MHz  
WDW EM  
SSB 0  
LB 0.30 Hz  
GB 0  
PC 1.00

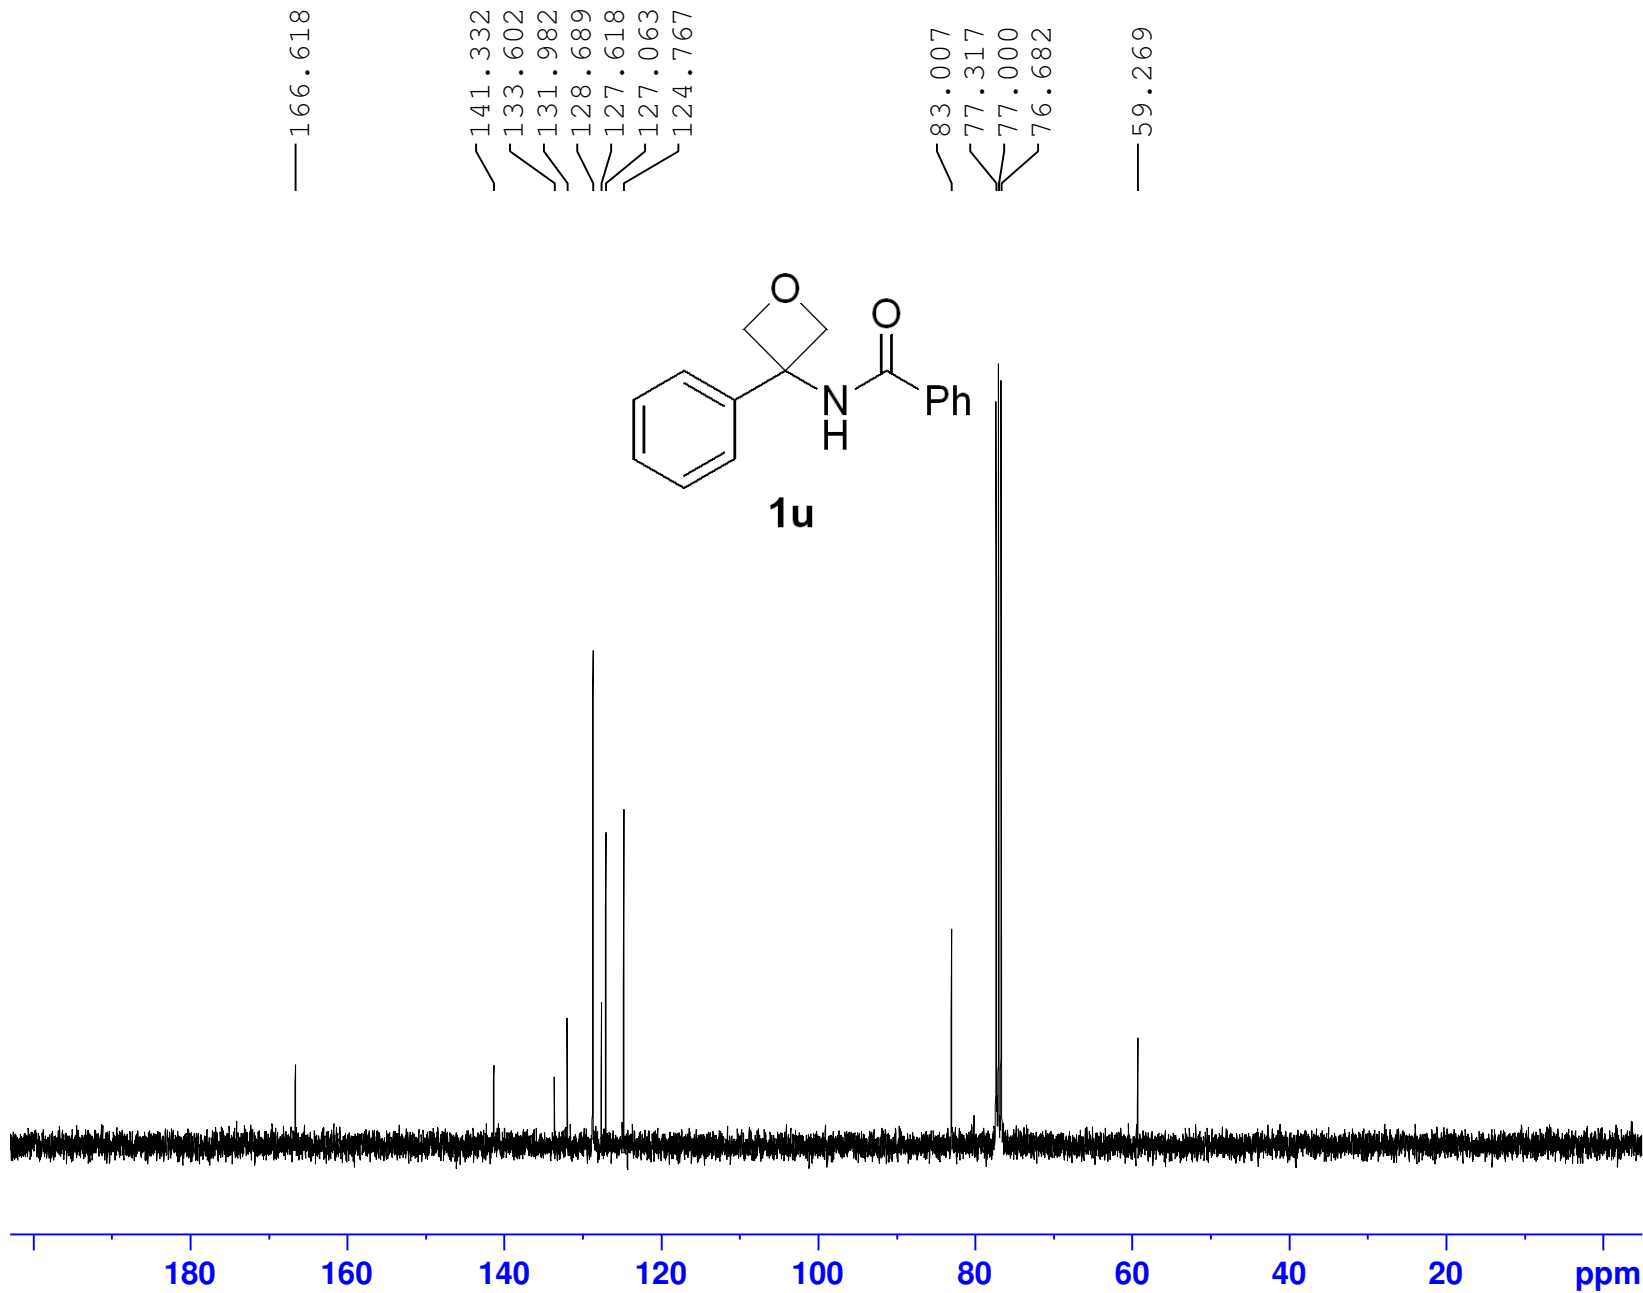

Current Data Parameters  
NAME czl-1-180  
EXPNO 2  
PROCNO 1

F2 - Acquisition Parameters  
Date\_ 20170731  
Time 13.17  
INSTRUM spect  
PROBHD 5 mm PABBO BB/  
PULPROG zgpg30  
TD 65536  
SOLVENT CDCl3  
NS 80  
DS 2  
SWH 24038.461 Hz  
FIDRES 0.366798 Hz  
AQ 1.3631488 sec  
RG 196.92  
DW 20.800 usec  
DE 6.50 usec  
TE 297.9 K  
D1 2.00000000 sec  
D11 0.03000000 sec  
TD0 1

==== CHANNEL f1 =====  
SFO1 100.6228298 MHz  
NUC1 13C  
P1 9.70 usec  
PLW1 46.98899841 W

==== CHANNEL f2 =====  
SFO2 400.1316005 MHz  
NUC2 1H  
CPDPRG[2] waltz16  
PCPD2 90.00 usec  
PLW2 11.99499989 W  
PLW12 0.34213999 W  
PLW13 0.27713001 W

F2 - Processing parameters  
SI 32768  
SF 100.6127736 MHz  
WDW EM  
SSB 0  
LB 1.00 Hz  
GB 0  
PC 1.40





7.815  
7.797  
7.566  
7.547  
7.528  
7.479  
7.458  
7.453  
7.433  
7.414  
7.340  
7.319  
7.260  
7.162

5.080  
5.062  
4.908  
4.891

—1.658

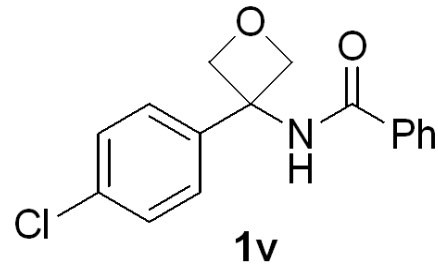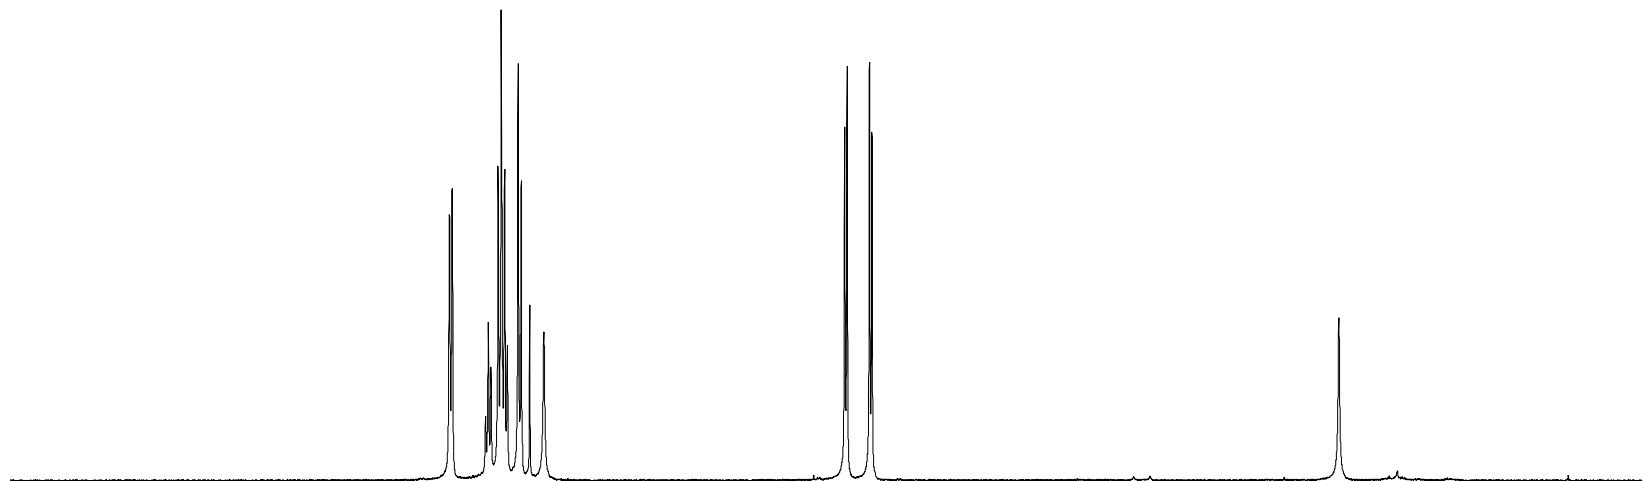

10 9 8 7 6 5 4 3 2 1 ppm

2.04  
1.14  
4.09  
2.10  
1.00

2.09  
2.04

Current Data Parameters  
NAME czl-1-181  
EXPNO 1  
PROCNO 1

F2 - Acquisition Parameters  
Date\_ 20170731  
Time 13.03  
INSTRUM spect  
PROBHD 5 mm PABBO BB/  
PULPROG zg30  
TD 65536  
SOLVENT CDCl3  
NS 4  
DS 2  
SWH 8012.820 Hz  
FIDRES 0.122266 Hz  
AQ 4.0894465 sec  
RG 187.77  
DW 62.400 usec  
DE 6.50 usec  
TE 297.3 K  
D1 1.00000000 sec  
TD0 1

==== CHANNEL f1 =====  
SFO1 400.1324710 MHz  
NUC1 1H  
P1 14.50 usec  
PLW1 11.99499989 W

F2 - Processing parameters  
SI 65536  
SF 400.1300104 MHz  
WDW EM  
SSB 0  
LB 0.30 Hz  
GB 0  
PC 1.00

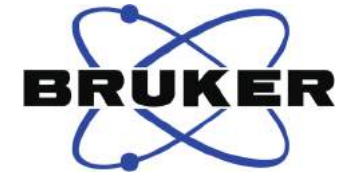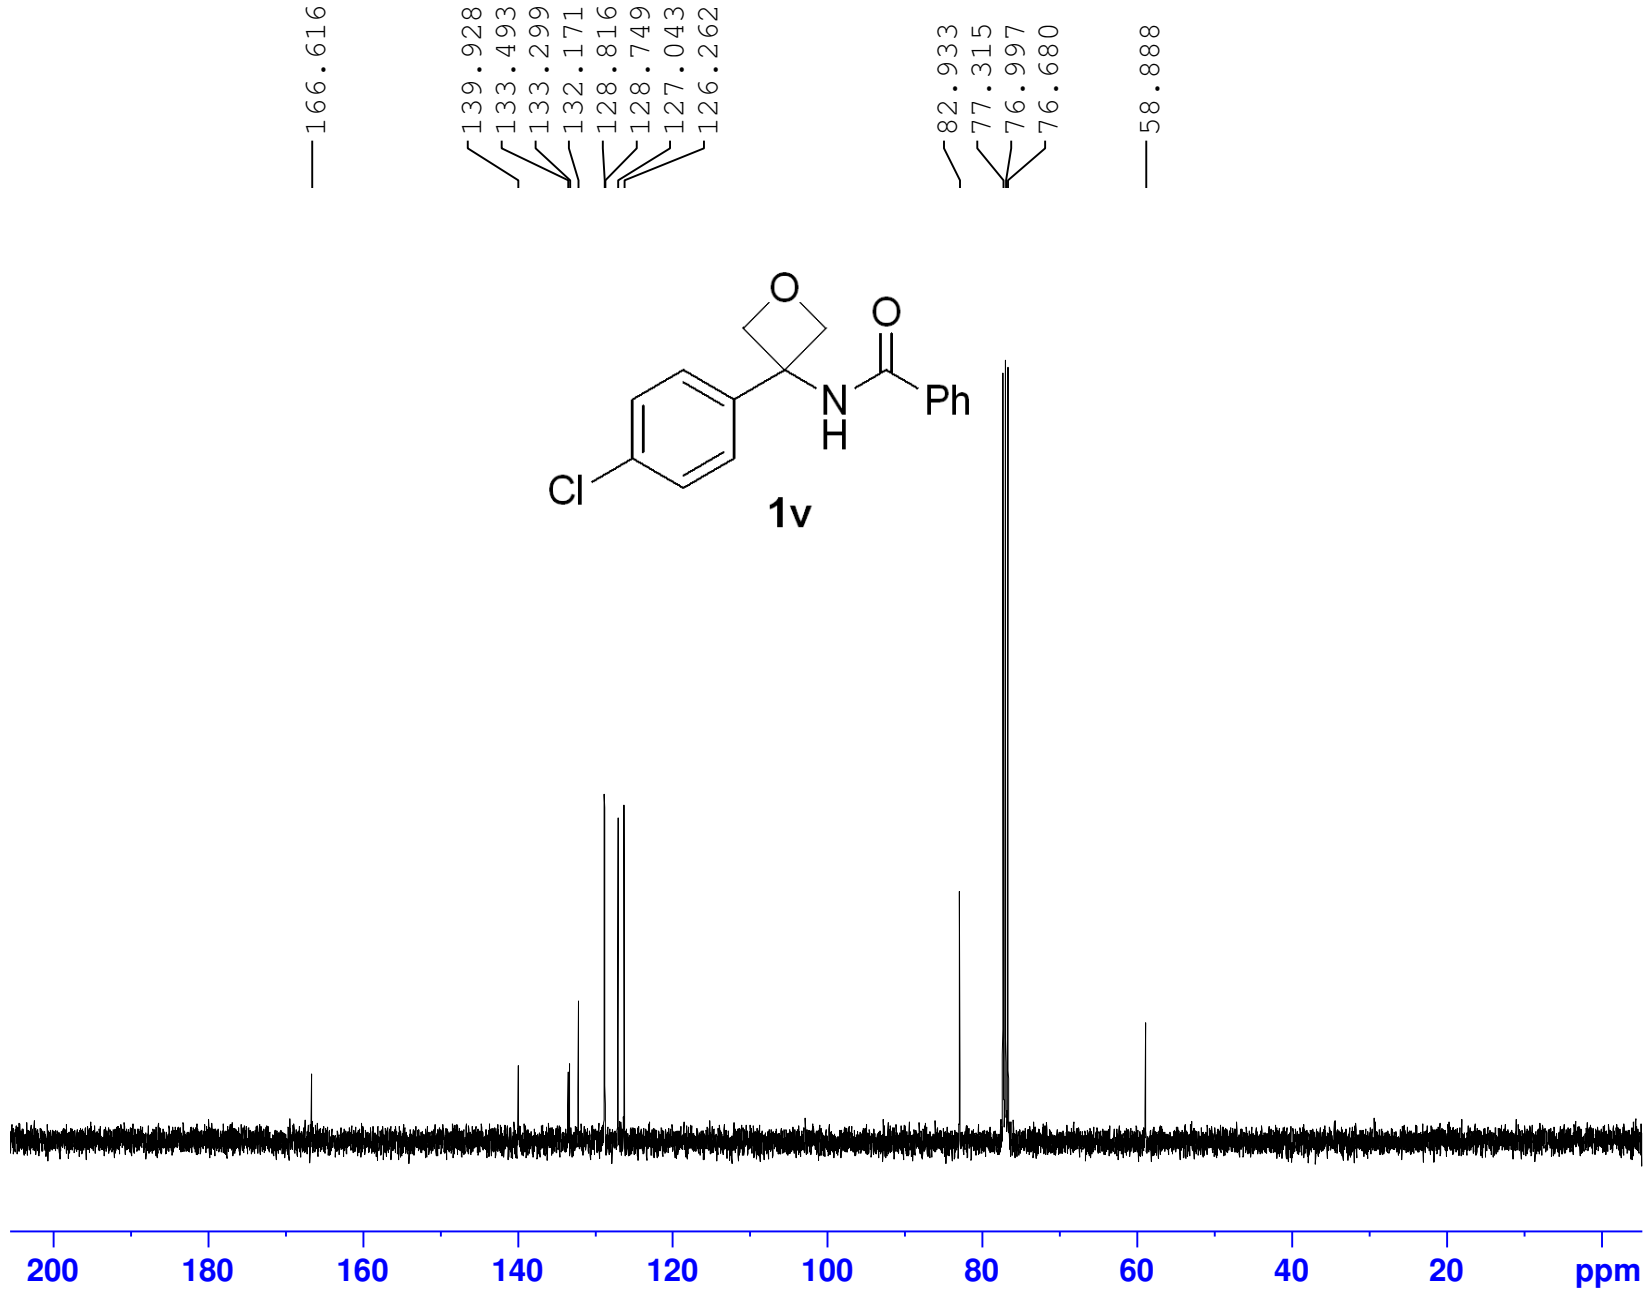

Current Data Parameters  
NAME czl-1-181  
EXPNO 2  
PROCNO 1

F2 - Acquisition Parameters  
Date\_ 20170731  
Time 13.22  
INSTRUM spect  
PROBHD 5 mm PABBO BB/  
PULPROG zgpg30  
TD 65536  
SOLVENT CDC13  
NS 100  
DS 2  
SWH 24038.461 Hz  
FIDRES 0.366798 Hz  
AQ 1.3631488 sec  
RG 196.92  
DW 20.800 usec  
DE 6.50 usec  
TE 298.0 K  
D1 2.00000000 sec  
D11 0.03000000 sec  
TD0 1

==== CHANNEL f1 =====  
SFO1 100.6228298 MHz  
NUC1 13C  
P1 9.70 usec  
PLW1 46.98899841 W

==== CHANNEL f2 =====  
SFO2 400.1316005 MHz  
NUC2 1H  
CPDPRG[2] waltz16  
PCPD2 90.00 usec  
PLW2 11.99499989 W  
PLW12 0.34213999 W  
PLW13 0.27713001 W

F2 - Processing parameters  
SI 32768  
SF 100.6127734 MHz  
WDW EM  
SSB 0  
LB 1.00 Hz  
GB 0  
PC 1.40



7.805  
7.787  
7.514  
7.495  
7.439  
7.417  
7.398  
7.379  
7.260  
7.248  
6.890  
6.869

5.088  
5.072  
4.920  
4.904

— 3.789

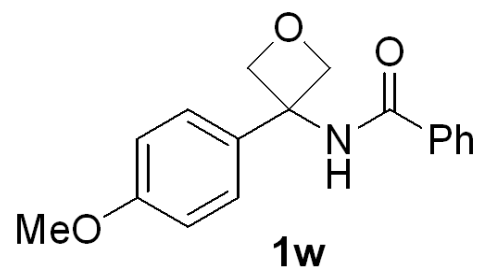

Current Data Parameters  
NAME czl-1-183  
EXPNO 1  
PROCNO 1

F2 - Acquisition Parameters  
Date\_ 20170801  
Time 20.01  
INSTRUM spect  
PROBHD 5 mm PABBO BB/  
PULPROG zg30  
TD 65536  
SOLVENT CDC13  
NS 4  
DS 2  
SWH 8012.820 Hz  
FIDRES 0.122266 Hz  
AQ 4.0894465 sec  
RG 88.84  
DW 62.400 usec  
DE 6.50 usec  
TE 297.3 K  
D1 1.00000000 sec  
TD0 1

==== CHANNEL f1 =====  
SFO1 400.1324710 MHz  
NUC1 1H  
P1 14.50 usec  
PLW1 11.99499989 W

F2 - Processing parameters  
SI 65536  
SF 400.1300102 MHz  
WDW EM  
SSB 0  
LB 0.30 Hz  
GB 0  
PC 1.00

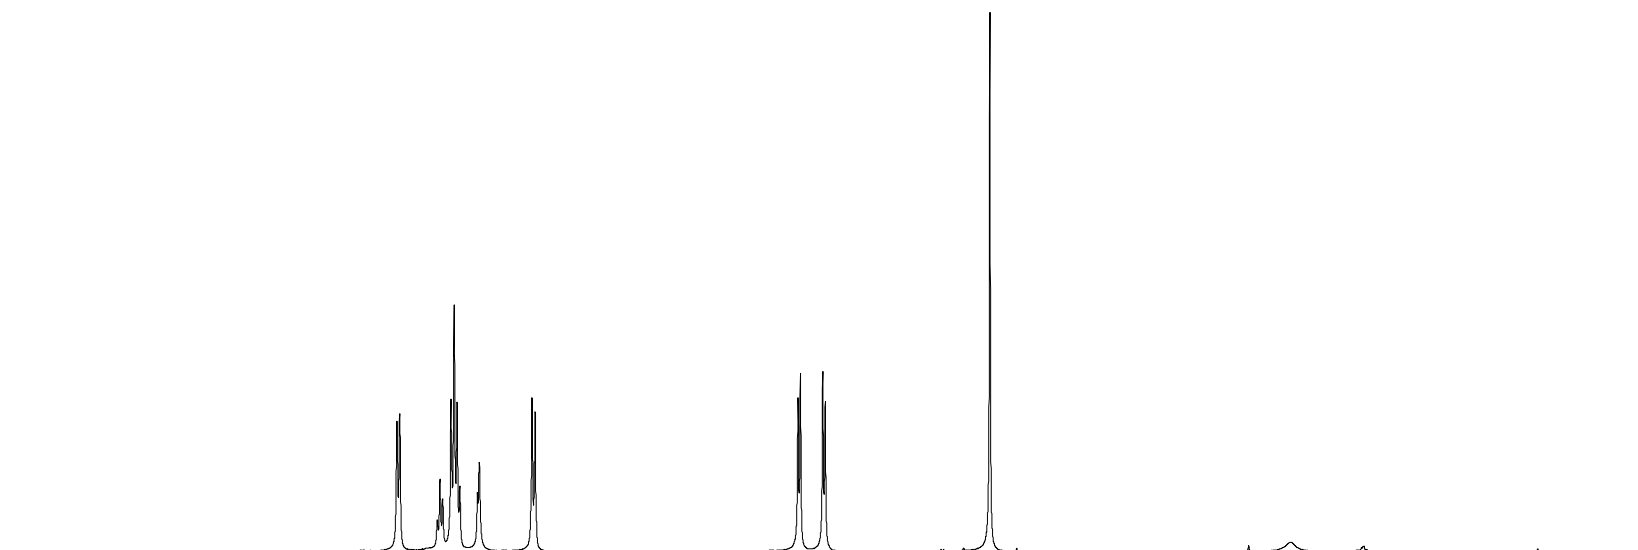

10 9 8 7 6 5 4 3 2 1 ppm

2.00  
1.08  
4.00  
1.16  
2.01

2.05  
2.06

3.04

S-107



— 166.625  
— 158.919  
└─ 133.664  
└─ 133.549  
└─ 131.899  
└─ 128.623  
└─ 127.043  
└─ 126.084  
— 113.987  
└─ 83.025  
└─ 77.318  
└─ 77.000  
└─ 76.682  
└─ 58.944  
└─ 55.279

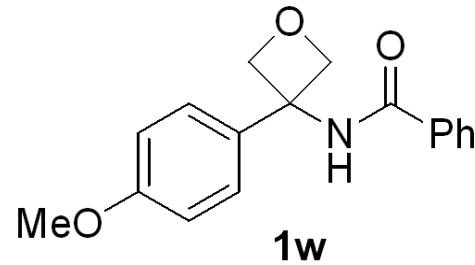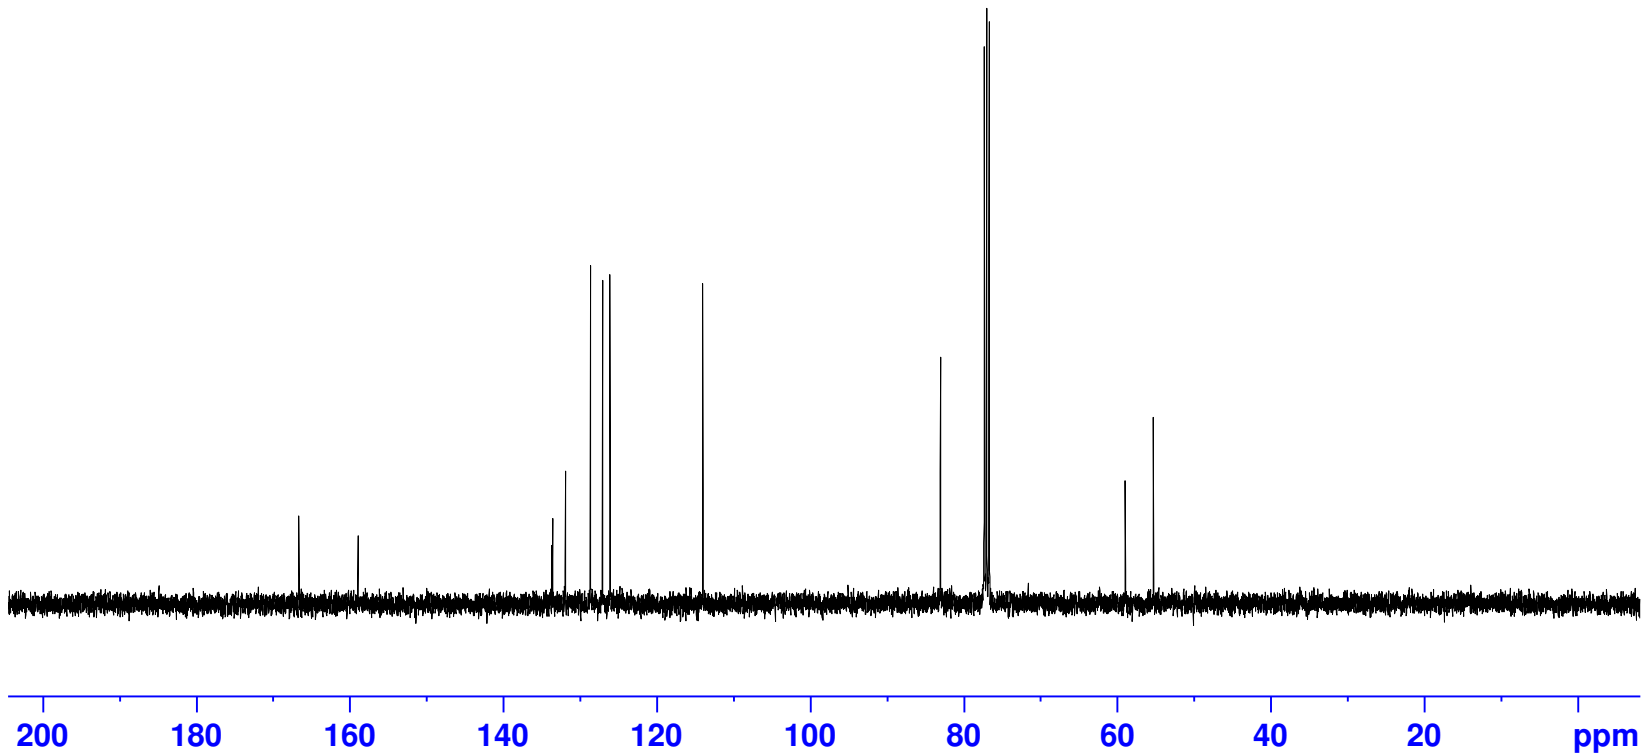

Current Data Parameters  
NAME czl-1-183  
EXPNO 2  
PROCNO 1

F2 - Acquisition Parameters  
Date\_ 20170801  
Time 20.04  
INSTRUM spect  
PROBHD 5 mm PABBO BB/  
PULPROG zgpg30  
TD 65536  
SOLVENT CDC13  
NS 40  
DS 2  
SWH 24038.461 Hz  
FIDRES 0.366798 Hz  
AQ 1.3631488 sec  
RG 196.92  
DW 20.800 usec  
DE 6.50 usec  
TE 298.0 K  
D1 2.00000000 sec  
D11 0.03000000 sec  
TD0 1

==== CHANNEL f1 =====  
SFO1 100.6228298 MHz  
NUC1 13C  
P1 9.70 usec  
PLW1 46.98899841 W

==== CHANNEL f2 =====  
SFO2 400.1316005 MHz  
NUC2 1H  
CPDPRG[2] waltz16  
PCPD2 90.00 usec  
PLW2 11.99499989 W  
PLW12 0.34213999 W  
PLW13 0.27713001 W

F2 - Processing parameters  
SI 32768  
SF 100.6127751 MHz  
WDW EM  
SSB 0  
LB 1.00 Hz  
GB 0  
PC 1.40



7.849  
7.830  
7.527  
7.509  
7.490  
7.448  
7.444  
7.435  
7.432  
7.425  
7.416  
7.398  
7.360  
7.309  
7.297  
7.280  
7.266  
7.259  
7.143  
5.058  
5.042  
5.010  
4.994

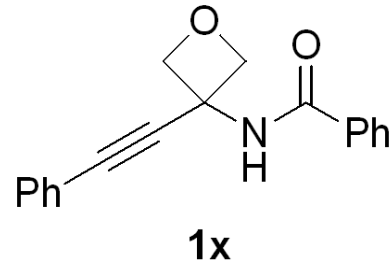

Current Data Parameters  
NAME czi-1-182  
EXPNO 1  
PROCNO 1

F2 - Acquisition Parameters  
Date\_ 20170731  
Time 13.06  
INSTRUM spect  
PROBHD 5 mm PABBO BB/  
PULPROG zg30  
TD 65536  
SOLVENT CDCl3  
NS 4  
DS 2  
SWH 8012.820 Hz  
FIDRES 0.122266 Hz  
AQ 4.0894465 sec  
RG 187.77  
DW 62.400 usec  
DE 6.50 usec  
TE 297.4 K  
D1 1.00000000 sec  
TD0 1

==== CHANNEL f1 =====  
SFO1 400.1324710 MHz  
NUC1 1H  
P1 14.50 usec  
PLW1 11.99499989 W

F2 - Processing parameters  
SI 65536  
SF 400.1300105 MHz  
WDW EM  
SSB 0  
LB 0.30 Hz  
GB 0  
PC 1.00

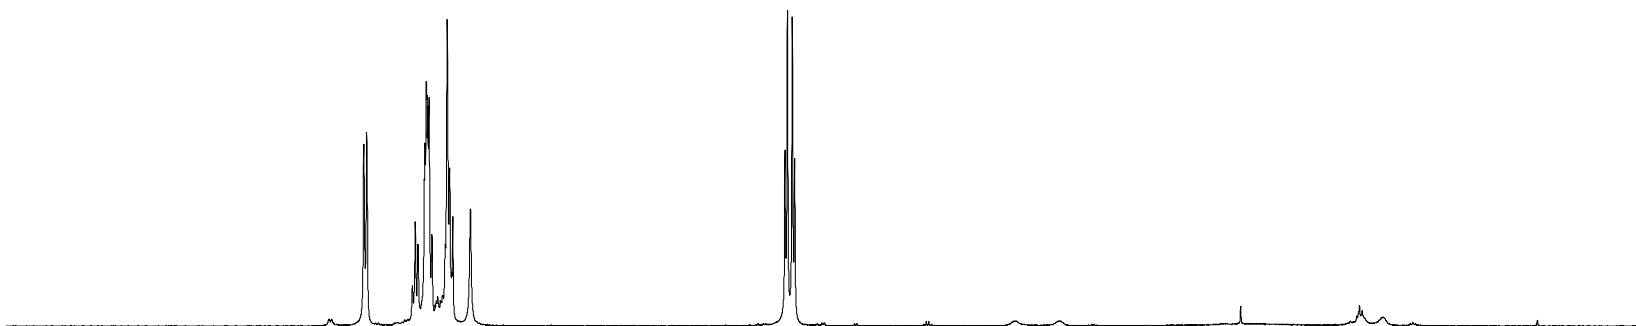

10 9 8 7 6 5 4 3 2 1 ppm

2.00  
1.15  
4.13  
3.15  
1.00

2.05  
2.01

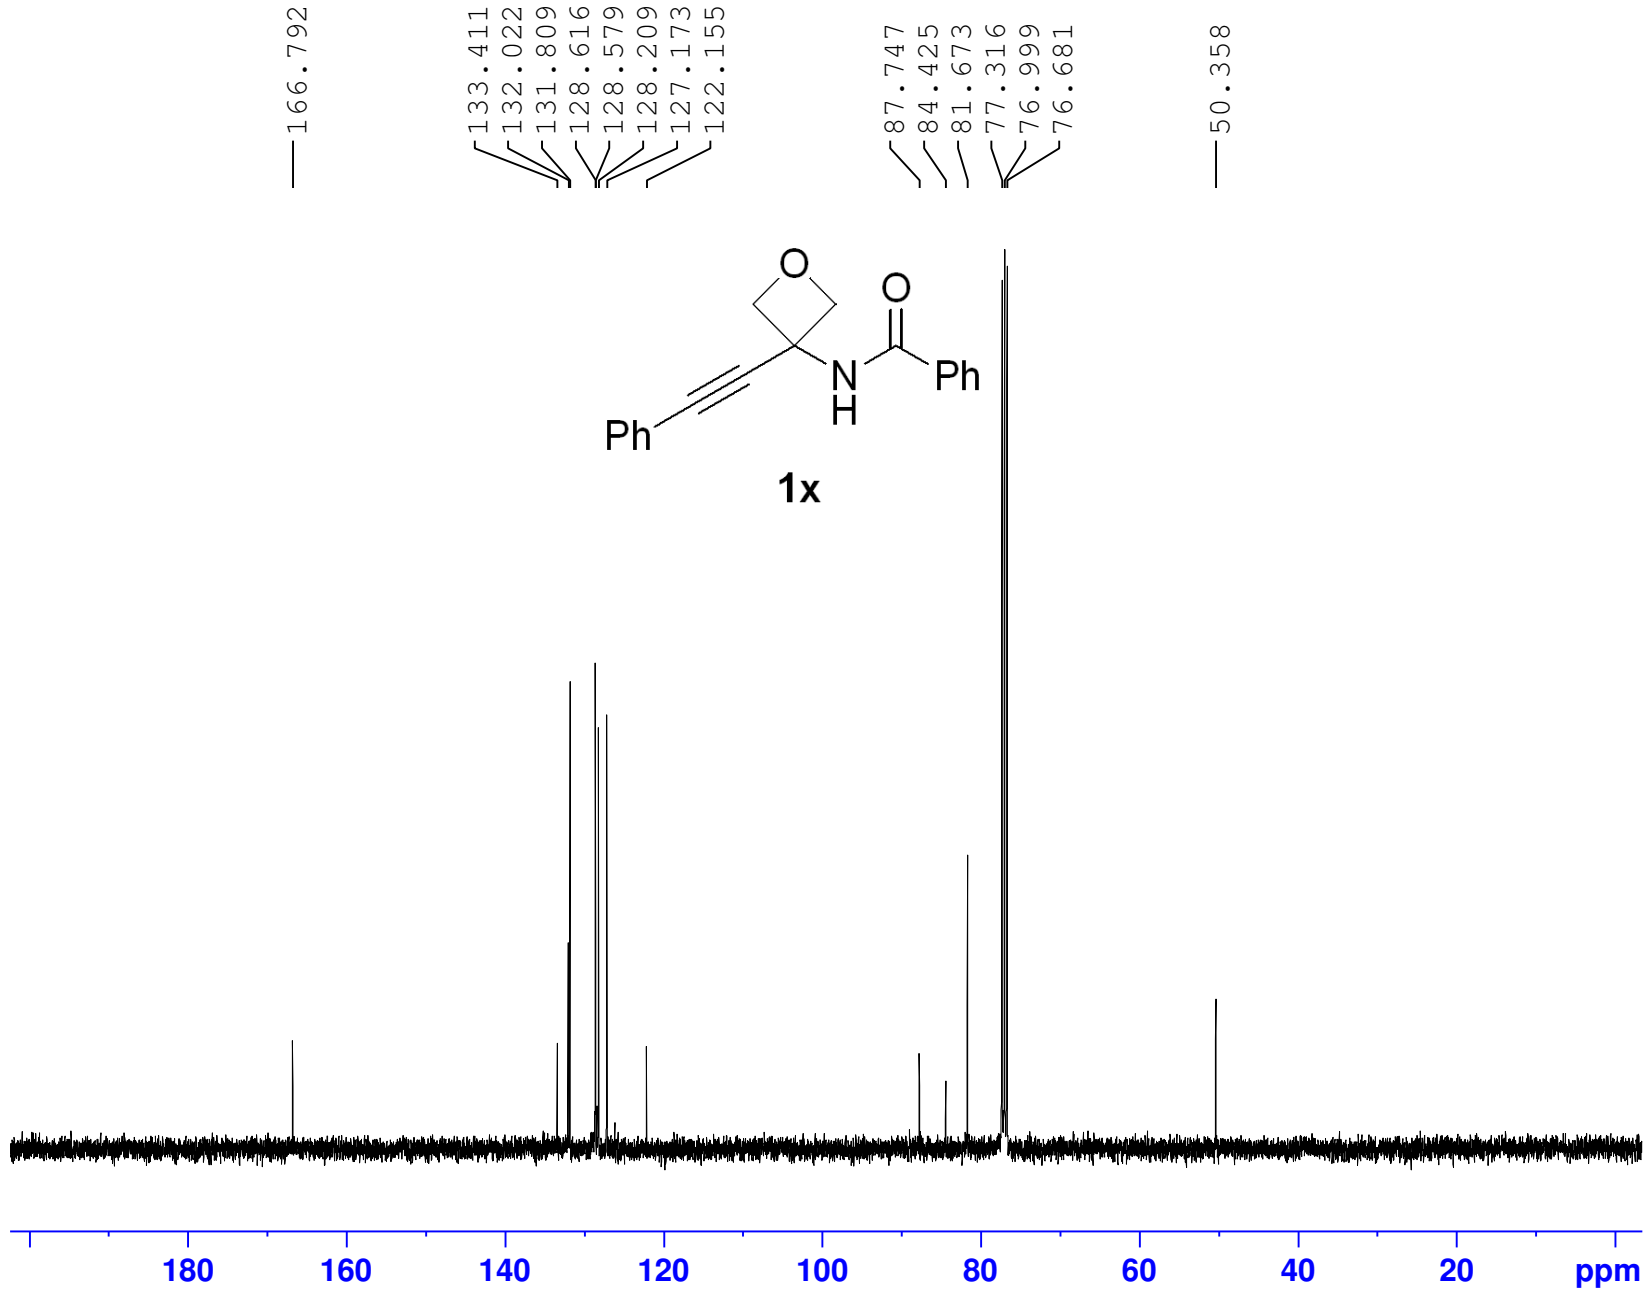

Current Data Parameters  
NAME czi-1-182  
EXPNO 2  
PROCNO 1

F2 - Acquisition Parameters  
Date\_ 20170731  
Time 13.13  
INSTRUM spect  
PROBHD 5 mm PABBO BB/  
PULPROG zgpg30  
TD 65536  
SOLVENT CDC13  
NS 100  
DS 2  
SWH 24038.461 Hz  
FIDRES 0.366798 Hz  
AQ 1.3631488 sec  
RG 196.92  
DW 20.800 usec  
DE 6.50 usec  
TE 297.9 K  
D1 2.00000000 sec  
D11 0.03000000 sec  
TD0 1

==== CHANNEL f1 =====  
SFO1 100.6228298 MHz  
NUC1 13C  
P1 9.70 usec  
PLW1 46.98899841 W

==== CHANNEL f2 =====  
SFO2 400.1316005 MHz  
NUC2 1H  
CPDPRG[2] waltz16  
PCPD2 90.00 usec  
PLW2 11.99499989 W  
PLW12 0.34213999 W  
PLW13 0.27713001 W

F2 - Processing parameters  
SI 32768  
SF 100.6127743 MHz  
WDW EM  
SSB 0  
LB 1.00 Hz  
GB 0  
PC 1.40



7.747  
7.734  
7.729  
7.726  
7.496  
7.493  
7.489  
7.479  
7.474  
7.469  
7.459  
7.456  
7.452  
7.404  
7.401  
7.388  
7.385  
7.371  
7.367  
7.260  
7.185  
4.852  
4.834  
4.625  
4.607  
4.108  
4.090  
4.072  
4.055  
3.273

1.213  
1.195  
1.178

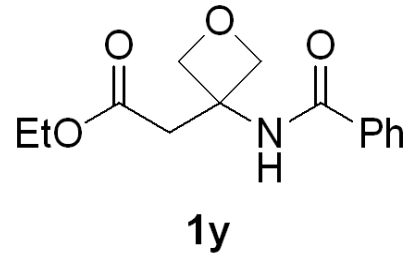

Current Data Parameters  
NAME czl-1-186  
EXPNO 1  
PROCNO 1

F2 - Acquisition Parameters  
Date\_ 20170802  
Time 13.44  
INSTRUM spect  
PROBHD 5 mm PABBO BB/  
PULPROG zg30  
TD 65536  
SOLVENT CDC13  
NS 4  
DS 2  
SWH 8012.820 Hz  
FIDRES 0.122266 Hz  
AQ 4.0894465 sec  
RG 54.81  
DW 62.400 usec  
DE 6.50 usec  
TE 299.0 K  
D1 1.00000000 sec  
TD0 1

==== CHANNEL f1 =====  
SFO1 400.1324710 MHz  
NUC1 1H  
P1 14.50 usec  
PLW1 11.99499989 W

F2 - Processing parameters  
SI 65536  
SF 400.1300100 MHz  
WDW EM  
SSB 0  
LB 0.30 Hz  
GB 0  
PC 1.00

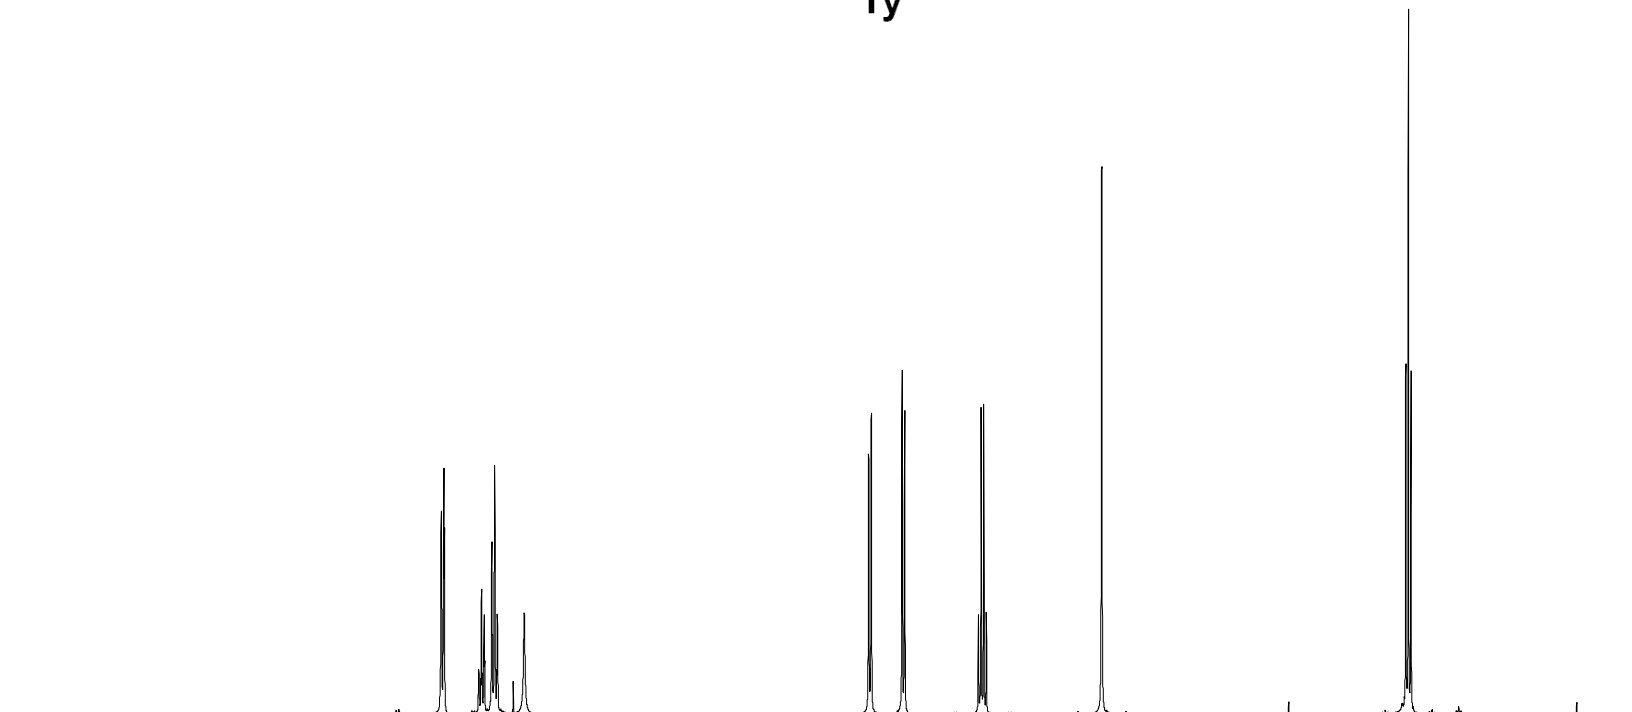

10 9 8 7 6 5 4 3 2 1 ppm

2.00  
1.00  
2.03  
0.98

2.00  
2.00

S-111

2.01

2.00

3.11

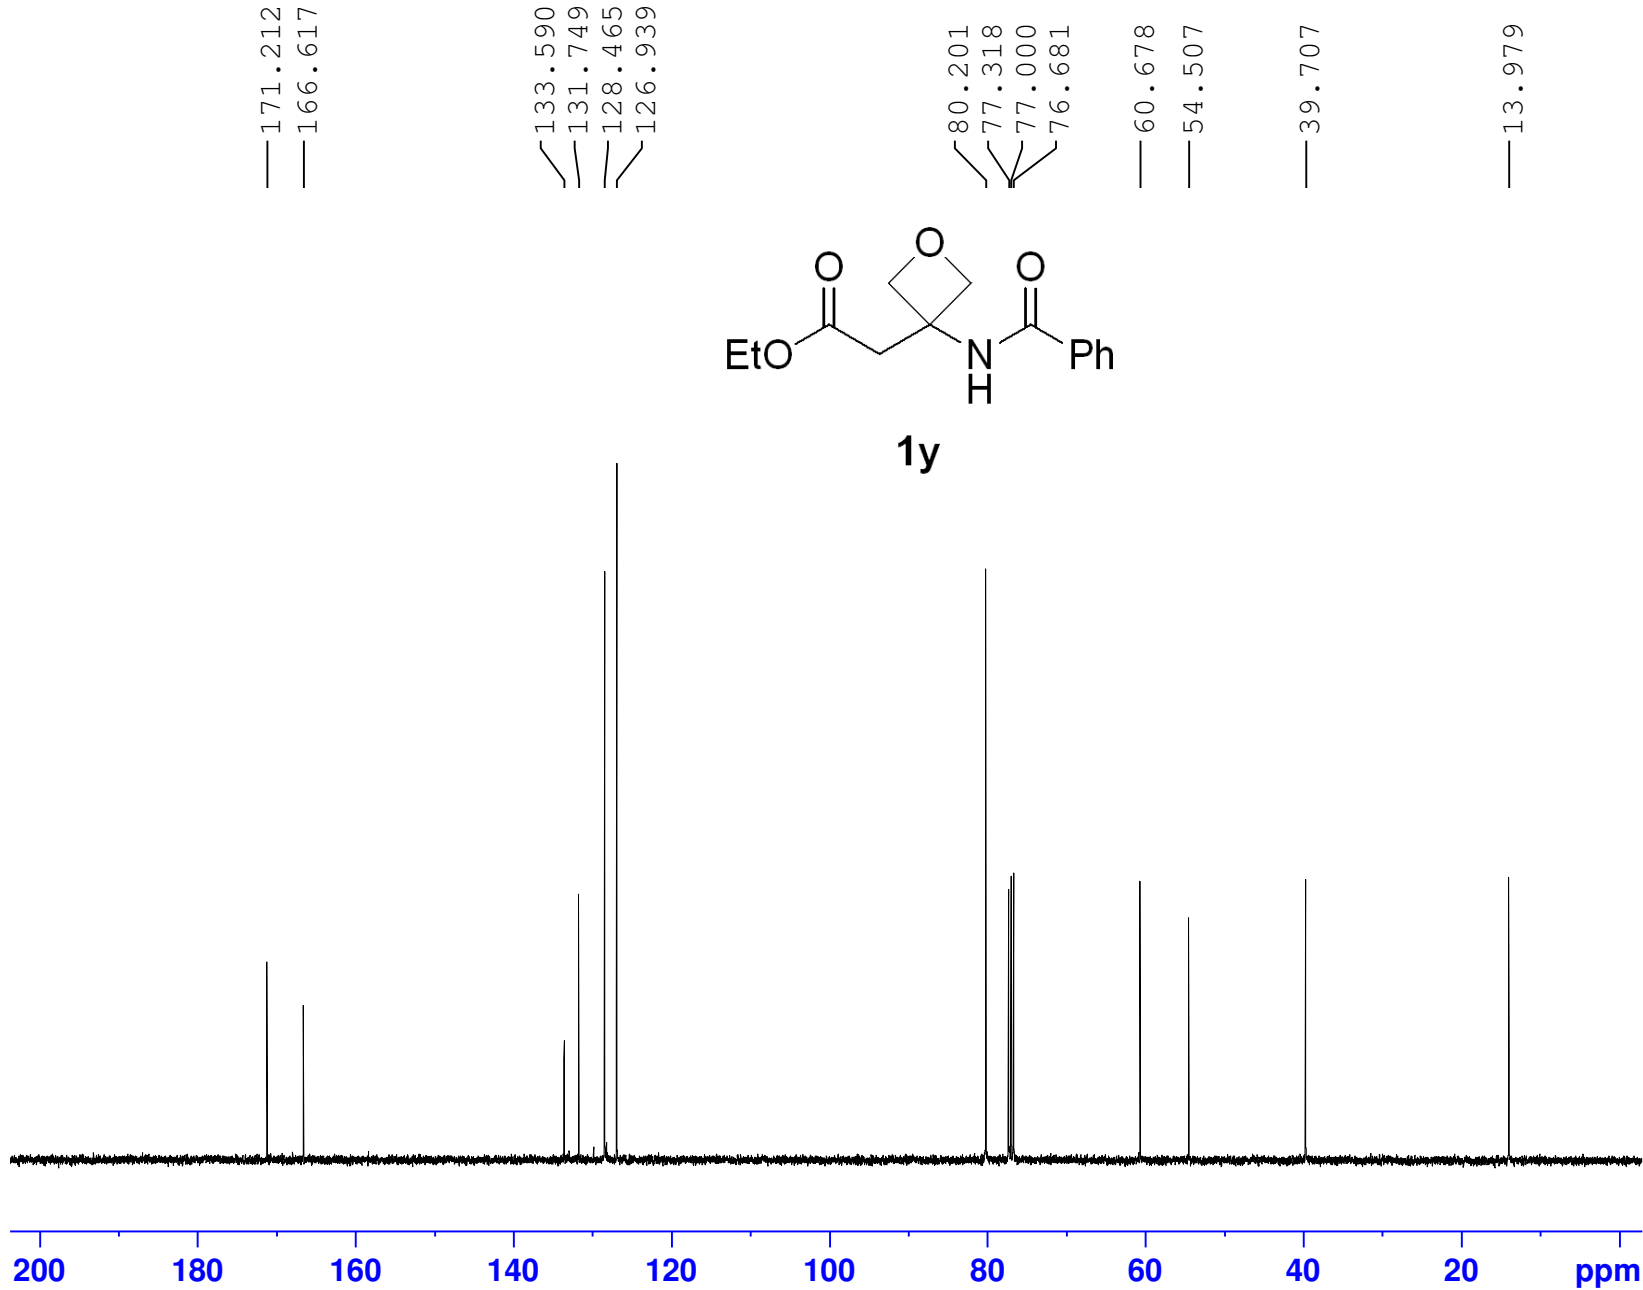

Current Data Parameters  
NAME czi-1-186  
EXPNO 2  
PROCNO 1

F2 - Acquisition Parameters  
Date\_ 20170802  
Time 13.49  
INSTRUM spect  
PROBHD 5 mm PABBO BB/  
PULPROG zgpg30  
TD 65536  
SOLVENT CDC13  
NS 400  
DS 2  
SWH 24038.461 Hz  
FIDRES 0.366798 Hz  
AQ 1.3631488 sec  
RG 196.92  
DW 20.800 usec  
DE 6.50 usec  
TE 299.1 K  
D1 2.00000000 sec  
D11 0.03000000 sec  
TD0 1

==== CHANNEL f1 =====  
SFO1 100.6228298 MHz  
NUC1 13C  
P1 9.70 usec  
PLW1 46.98899841 W

==== CHANNEL f2 =====  
SFO2 400.1316005 MHz  
NUC2 1H  
CPDPRG[2] waltz16  
PCPD2 90.00 usec  
PLW2 11.99499989 W  
PLW12 0.34213999 W  
PLW13 0.27713001 W

F2 - Processing parameters  
SI 32768  
SF 100.6127808 MHz  
WDW EM  
SSB 0  
LB 1.00 Hz  
GB 0  
PC 1.40



—11.993

7.449  
7.441  
7.429  
7.421  
7.402  
7.399  
7.260  
7.000  
6.979  
6.950  
6.894  
6.876  
6.856  
5.229  
5.213  
5.196  
5.179  
5.048  
5.030  
5.012  
4.655  
4.639  
4.623

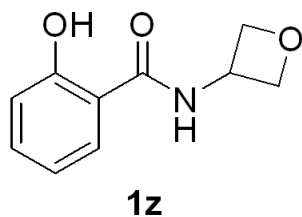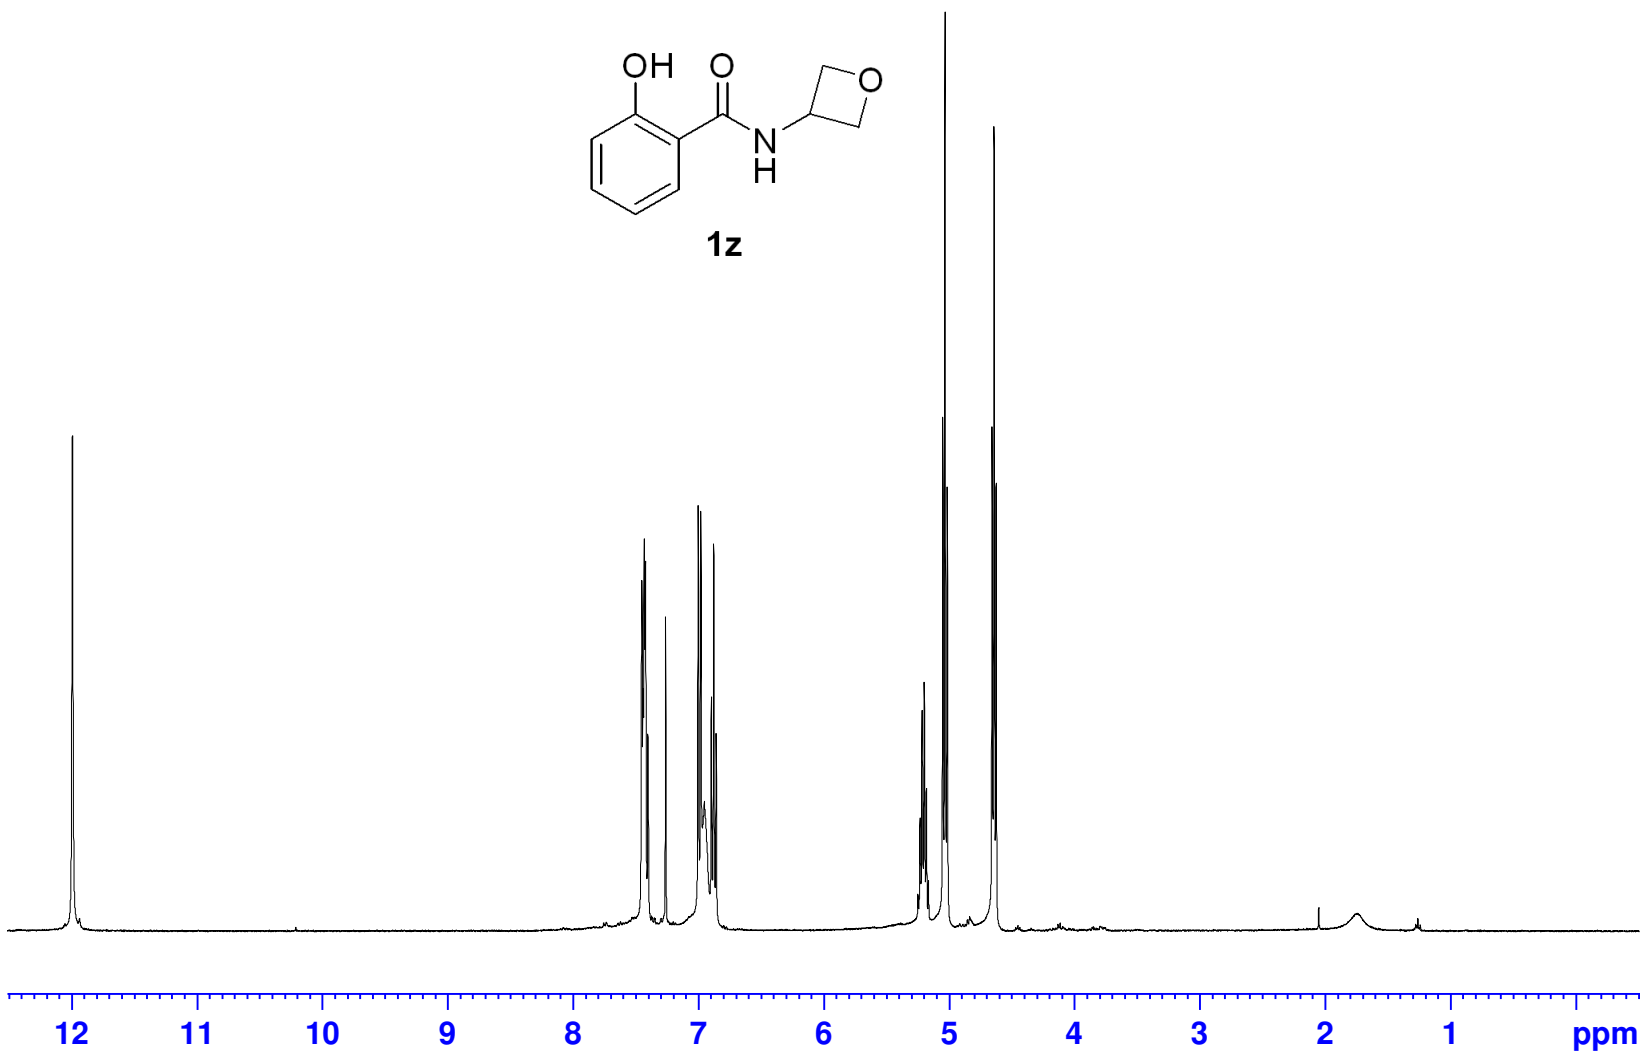

Current Data Parameters  
NAME hh-3-140-h-crude  
EXPNO 1  
PROCNO 1

F2 - Acquisition Parameters  
Date\_ 20190701  
Time 13.53  
INSTRUM spect  
PROBHD 5 mm PABBO BB/  
PULPROG zg30  
TD 65536  
SOLVENT CDCl3  
NS 6  
DS 2  
SWH 8012.820 Hz  
FIDRES 0.122266 Hz  
AQ 4.0894465 sec  
RG 103.52  
DW 62.400 usec  
DE 6.50 usec  
TE 294.5 K  
D1 1.00000000 sec  
TD0 1

==== CHANNEL f1 =====  
SFO1 400.1324710 MHz  
NUC1 1H  
P1 14.50 usec  
PLW1 11.99499989 W

F2 - Processing parameters  
SI 65536  
SF 400.1300103 MHz  
WDW EM  
SSB 0  
LB 0.30 Hz  
GB 0  
PC 1.00

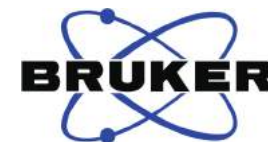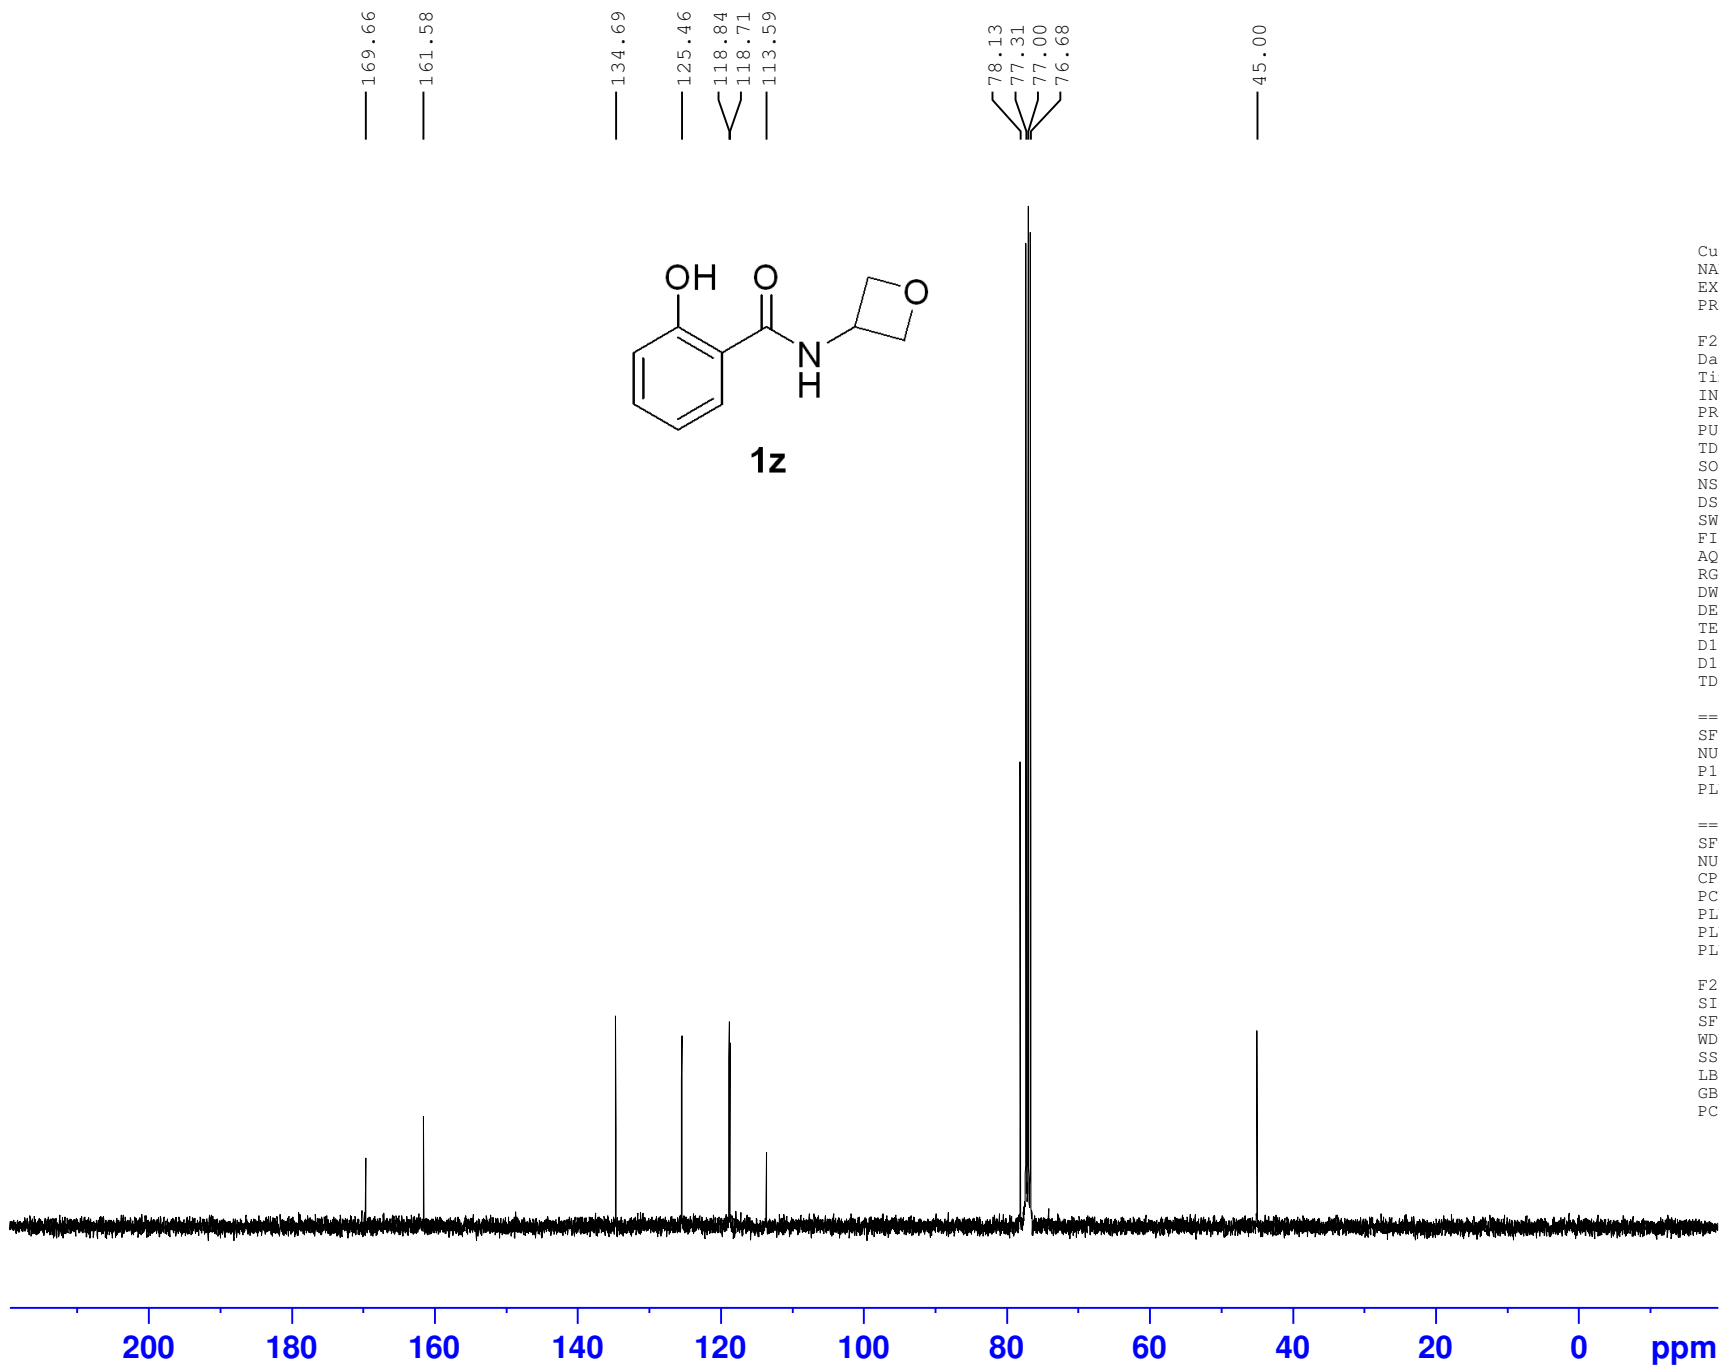

Current Data Parameters  
NAME hh-3-140-c-crude  
EXPNO 2  
PROCNO 1

F2 - Acquisition Parameters  
Date\_ 20190701  
Time 14.11  
INSTRUM spect  
PROBHD 5 mm PABBO BB/  
PULPROG zgpg30  
TD 65536  
SOLVENT CDCl3  
NS 166  
DS 0  
SWH 24038.461 Hz  
FIDRES 0.366798 Hz  
AQ 1.3631488 sec  
RG 196.92  
DW 20.800 usec  
DE 6.50 usec  
TE 295.7 K  
D1 2.0000000 sec  
D11 0.0300000 sec  
TD0 1

==== CHANNEL f1 =====  
SFO1 100.6228298 MHz  
NUC1 13C  
P1 9.70 usec  
PLW1 46.98899841 W

==== CHANNEL f2 =====  
SFO2 400.1316005 MHz  
NUC2 1H  
PCPD2 waltz16  
PLW2 90.00 usec  
PLW12 11.99499989 W  
PLW13 0.34213999 W  
PLW13 0.27713001 W

F2 - Processing parameters  
SI 32768  
SF 100.6127739 MHz  
WDW EM  
SSB 0  
LB 1.00 Hz  
GB 0  
PC 1.40



Current Data Parameters  
NAME YW-1722  
EXPNO 1  
PROCNO 2

F2 - Acquisition Parameters  
Date\_ 20160413  
Time 14.34  
INSTRUM spect  
PROBHD 5 mm PABBO BB/  
PULPROG zg30  
TD 65536  
SOLVENT CDC13  
NS 4  
DS 0  
SWH 8012.820 Hz  
FIDRES 0.122266 Hz  
AQ 4.0894465 sec  
RG 34.77  
DW 62.400 usec  
DE 6.50 usec  
TE 296.6 K  
D1 1.00000000 sec  
TD0 1

==== CHANNEL f1 =====  
SFO1 400.1324710 MHz  
NUC1 1H  
P1 14.50 usec  
PLW1 11.99499989 W

F2 - Processing parameters  
SI 65536  
SF 400.1300091 MHz  
WDW EM  
SSB 0  
LB 0.30 Hz  
GB 0  
PC 1.00

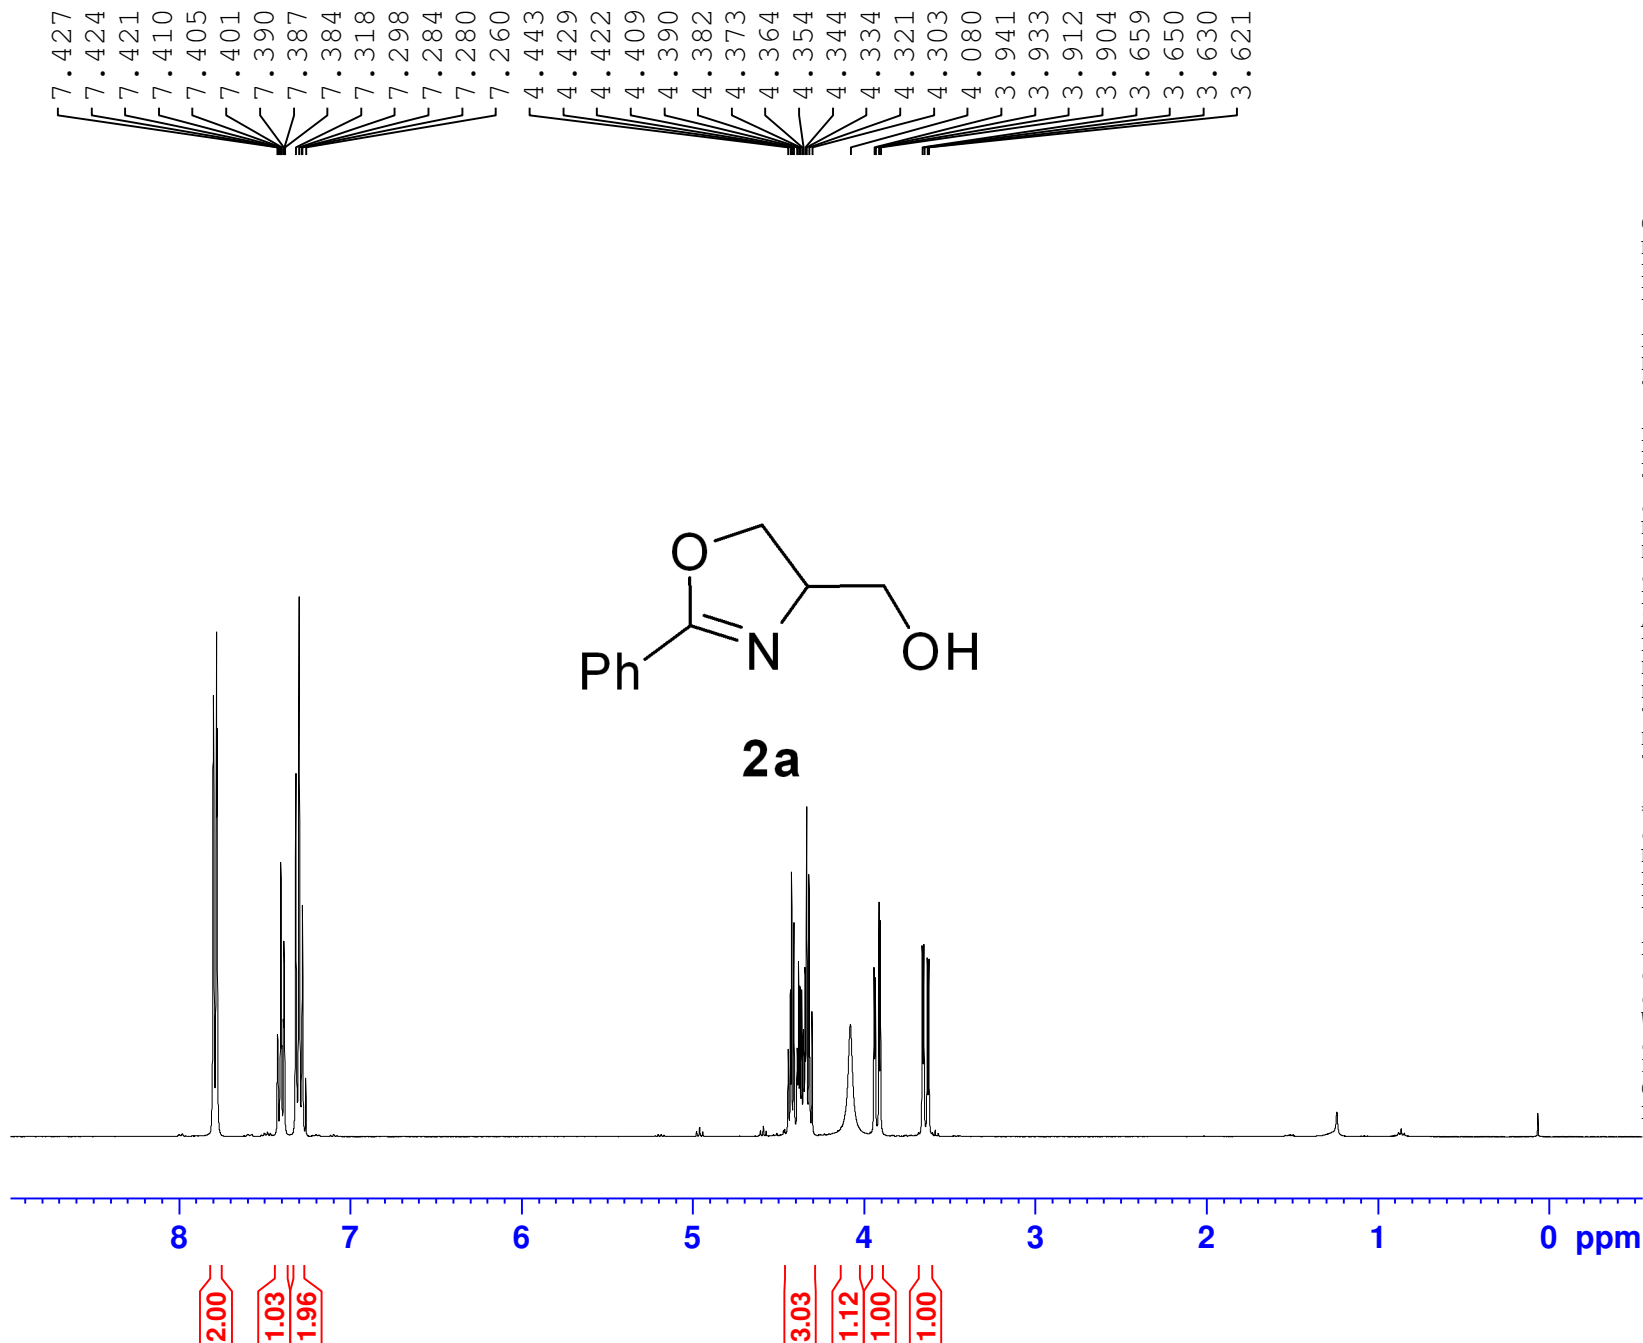

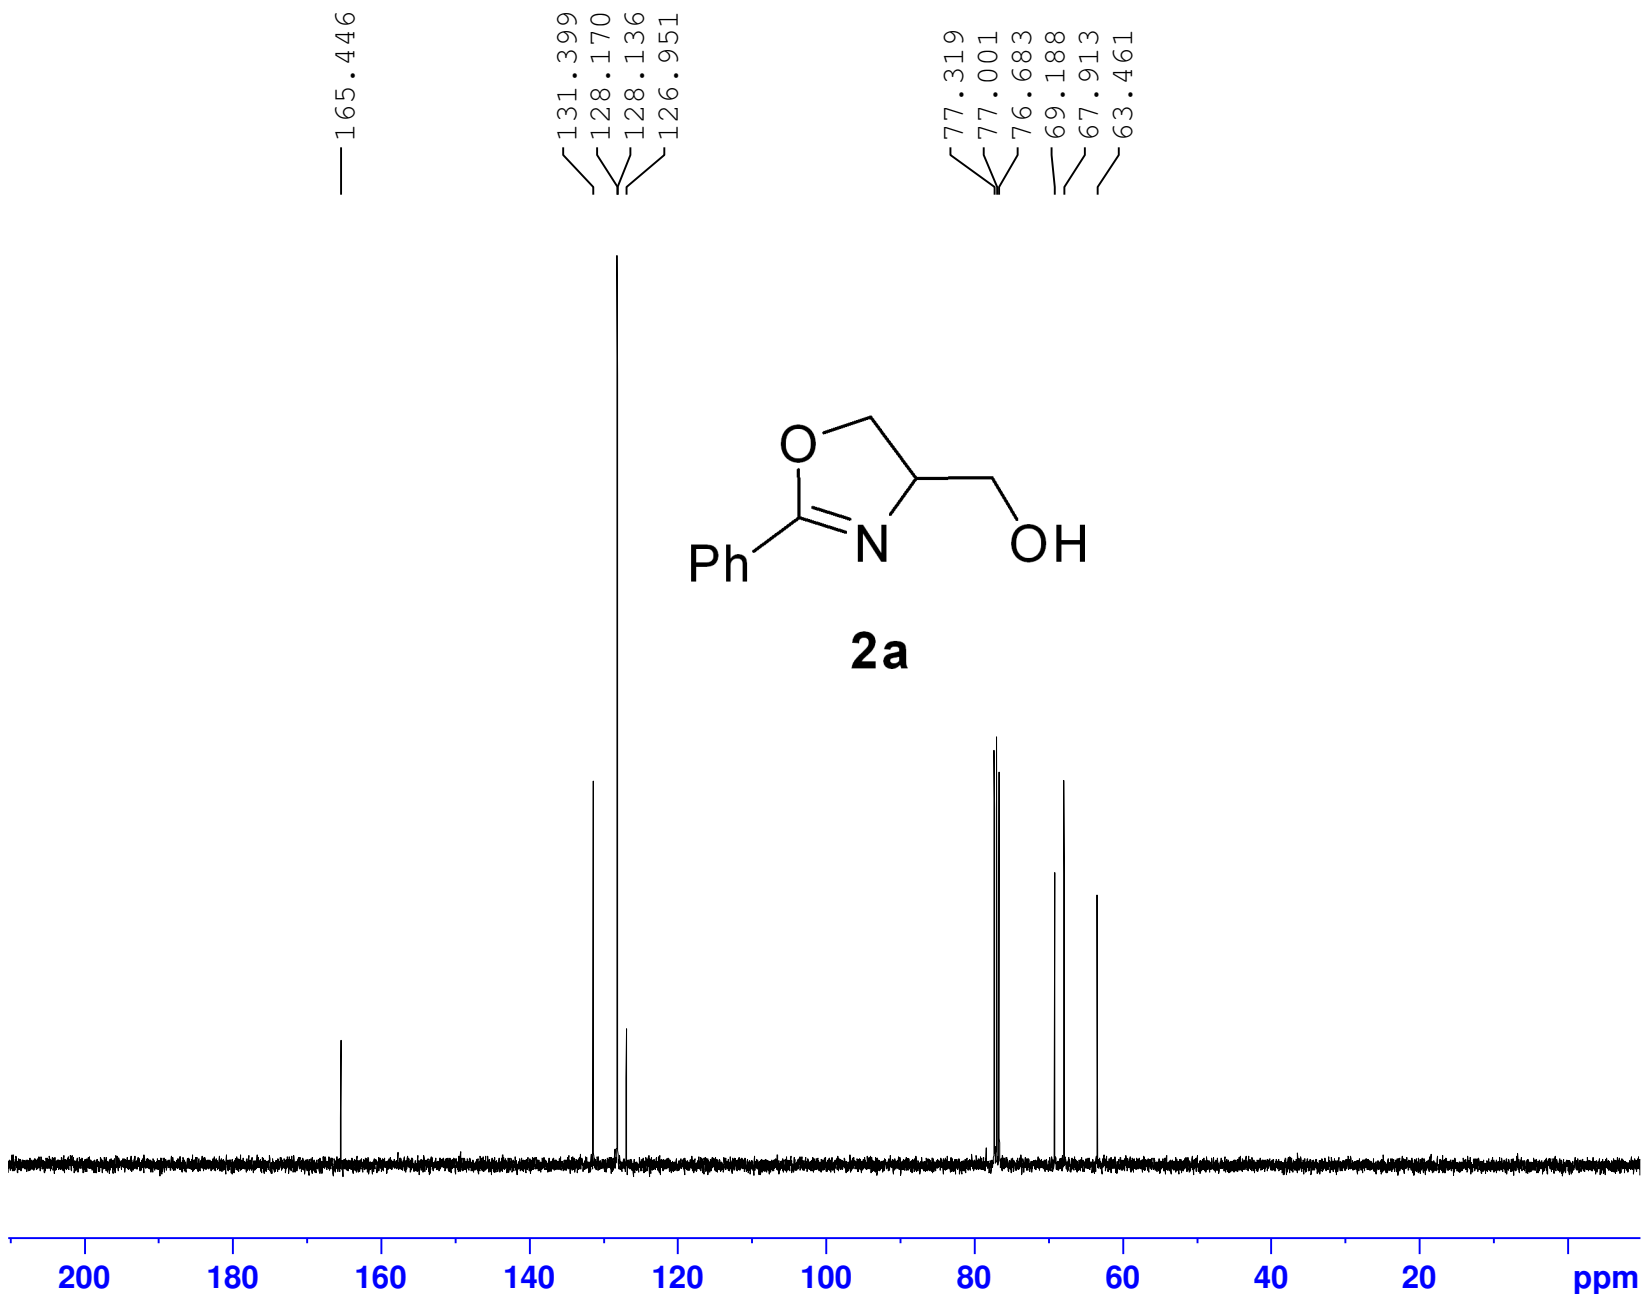

Current Data Parameters  
NAME YW-1722-carbon  
EXPNO 2  
PROCNO 2

F2 - Acquisition Parameters  
Date\_ 20160413  
Time 14.40  
INSTRUM spect  
PROBHD 5 mm PABBO BB/  
PULPROG zgpg30  
TD 65536  
SOLVENT CDC13  
NS 21  
DS 0  
SWH 24038.461 Hz  
FIDRES 0.366798 Hz  
AQ 1.3631488 sec  
RG 196.92  
DW 20.800 usec  
DE 6.50 usec  
TE 297.3 K  
D1 2.00000000 sec  
D11 0.03000000 sec  
TD0 1

==== CHANNEL f1 =====  
SFO1 100.6228298 MHz  
NUC1 13C  
P1 9.70 usec  
PLW1 46.98899841 W

==== CHANNEL f2 =====  
SFO2 400.1316005 MHz  
NUC2 1H  
CPDPRG[2] waltz16  
PCPD2 90.00 usec  
PLW2 11.99499989 W  
PLW12 0.34213999 W  
PLW13 0.27713001 W

F2 - Processing parameters  
SI 32768  
SF 100.6127795 MHz  
WDW EM  
SSB 0  
LB 1.00 Hz  
GB 0  
PC 1.40

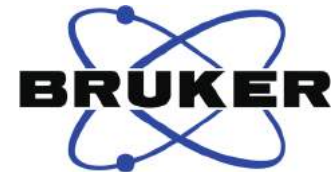

7.930  
7.909  
7.609  
7.589  
7.585  
7.563  
7.476  
7.458  
7.439  
7.399  
7.381  
7.363  
7.260

4.528  
4.505  
4.489  
4.468  
4.460  
4.451  
4.441  
4.427  
4.392  
4.375  
4.358  
4.020  
4.013  
3.991  
3.709  
3.701  
3.680  
3.672  
3.311

Current Data Parameters  
NAME YW-1735D-carbon  
EXPNO 1  
PROCNO 1

F2 - Acquisition Parameters  
Date\_ 20160415  
Time 19.39  
INSTRUM spect  
PROBHD 5 mm PABBO BB/  
PULPROG zg30  
TD 65536  
SOLVENT CDC13  
NS 6  
DS 0  
SWH 8012.820 Hz  
FIDRES 0.122266 Hz  
AQ 4.0894465 sec  
RG 103.52  
DW 62.400 usec  
DE 6.50 usec  
TE 296.7 K  
D1 1.00000000 sec  
TD0 1

==== CHANNEL f1 =====  
SFO1 400.1324710 MHz  
NUC1 1H  
P1 14.50 usec  
PLW1 11.99499989 W

F2 - Processing parameters  
SI 65536  
SF 400.1300092 MHz  
WDW EM  
SSB 0  
LB 0.30 Hz  
GB 0  
PC 1.00

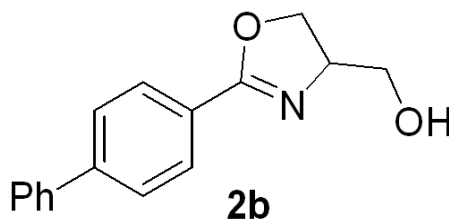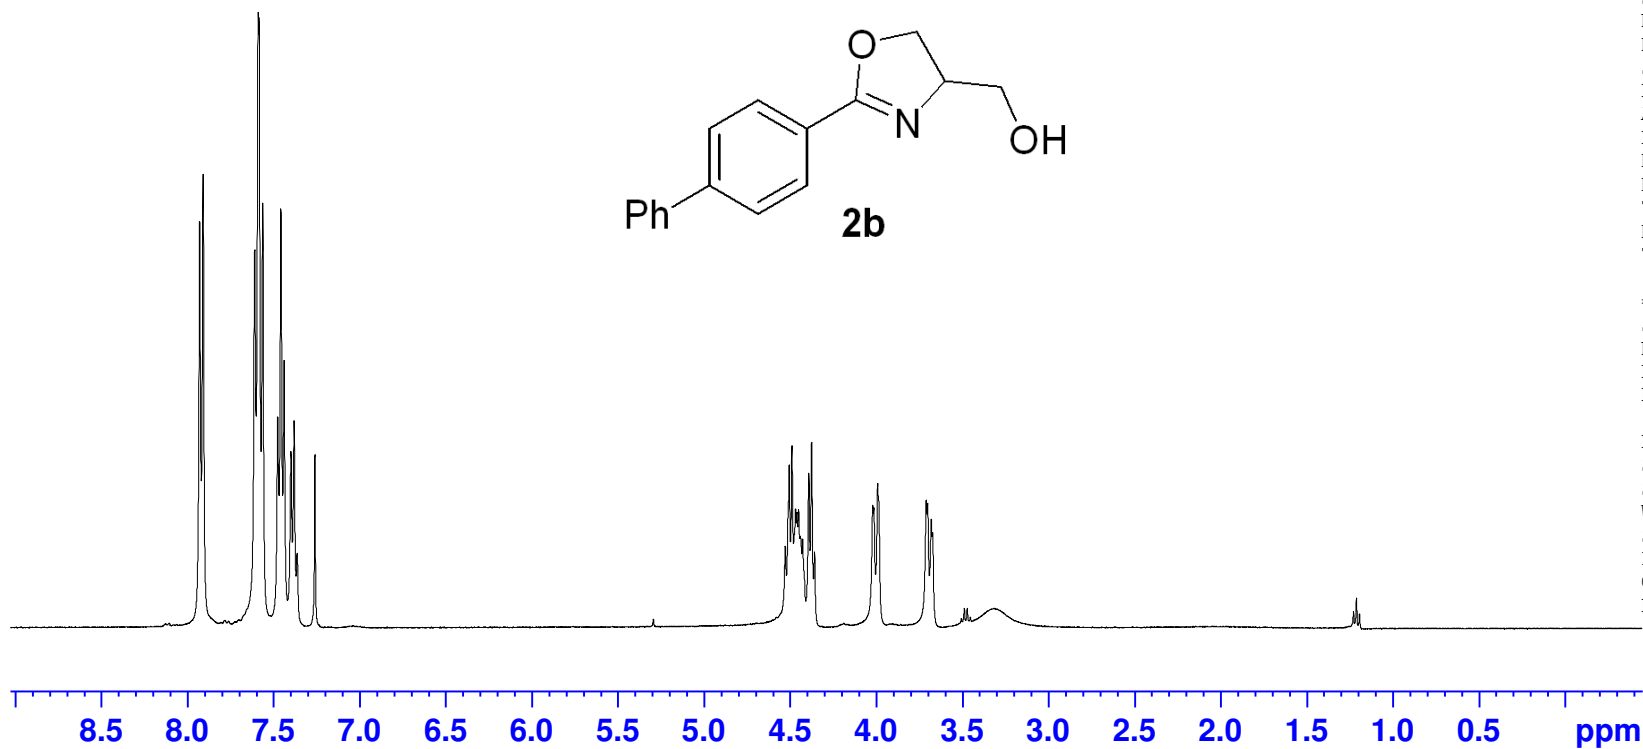

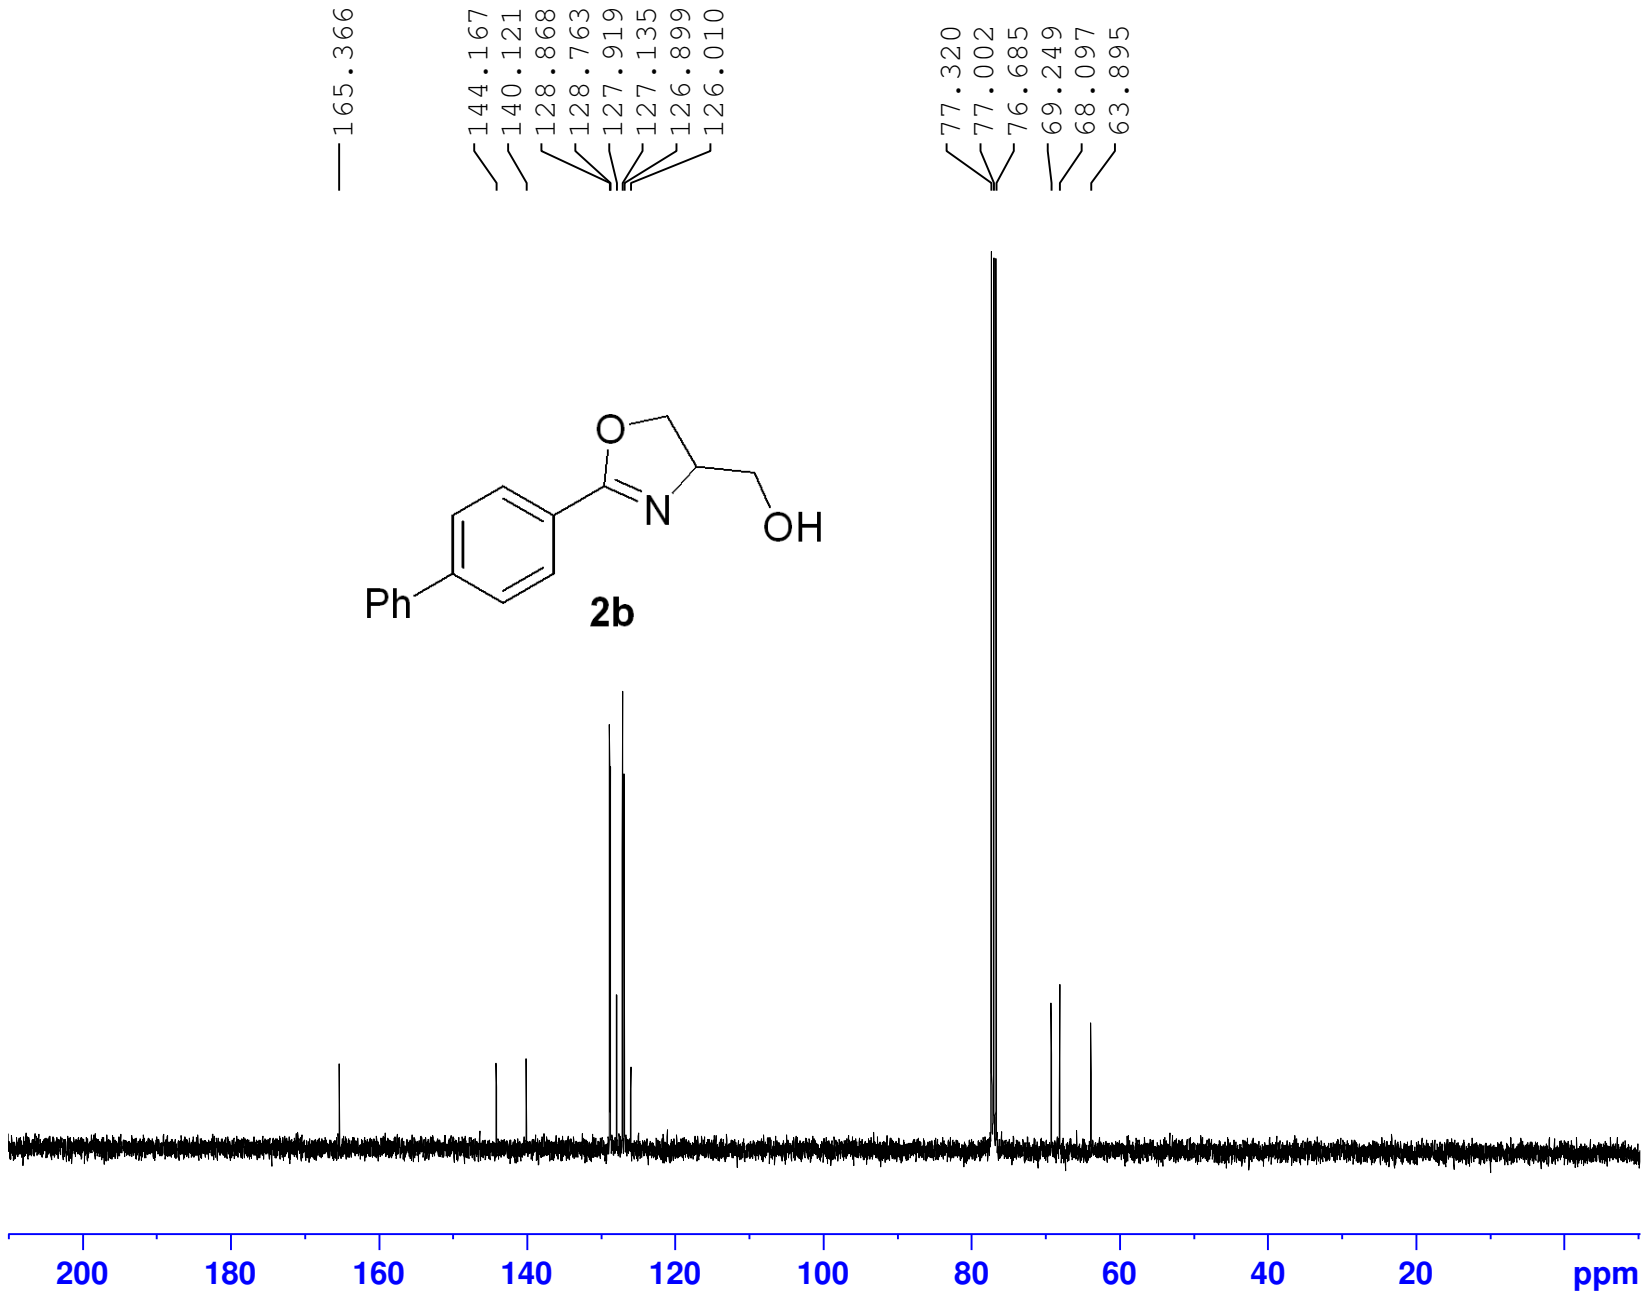

Current Data Parameters  
NAME YW-1735D-carbon  
EXPNO 2  
PROCNO 1

F2 - Acquisition Parameters  
Date\_ 20160415  
Time 19.49  
INSTRUM spect  
PROBHD 5 mm PABBO BB/  
PULPROG zgpg30  
TD 65536  
SOLVENT CDC13  
NS 162  
DS 0  
SWH 24038.461 Hz  
FIDRES 0.366798 Hz  
AQ 1.3631488 sec  
RG 196.92  
DW 20.800 usec  
DE 6.50 usec  
TE 297.8 K  
D1 2.00000000 sec  
D11 0.03000000 sec  
TD0 1

==== CHANNEL f1 =====  
SFO1 100.6228298 MHz  
NUC1 13C  
P1 9.70 usec  
PLW1 46.98899841 W

==== CHANNEL f2 =====  
SFO2 400.1316005 MHz  
NUC2 1H  
CPDPRG[2] waltz16  
PCPD2 90.00 usec  
PLW2 11.99499989 W  
PLW12 0.34213999 W  
PLW13 0.27713001 W

F2 - Processing parameters  
SI 32768  
SF 100.6127722 MHz  
WDW EM  
SSB 0  
LB 1.00 Hz  
GB 0  
PC 1.40



7.778  
7.761  
7.757  
7.324  
7.319  
7.306  
7.302  
7.260  
4.508  
4.492  
4.486  
4.470  
4.439  
4.430  
4.421  
4.411  
4.402  
4.398  
4.389  
4.381  
4.374  
4.358  
4.339  
3.993  
3.985  
3.964  
3.956  
3.673  
3.664  
3.644  
3.635  
3.244

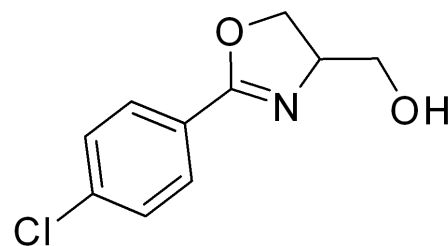

2c

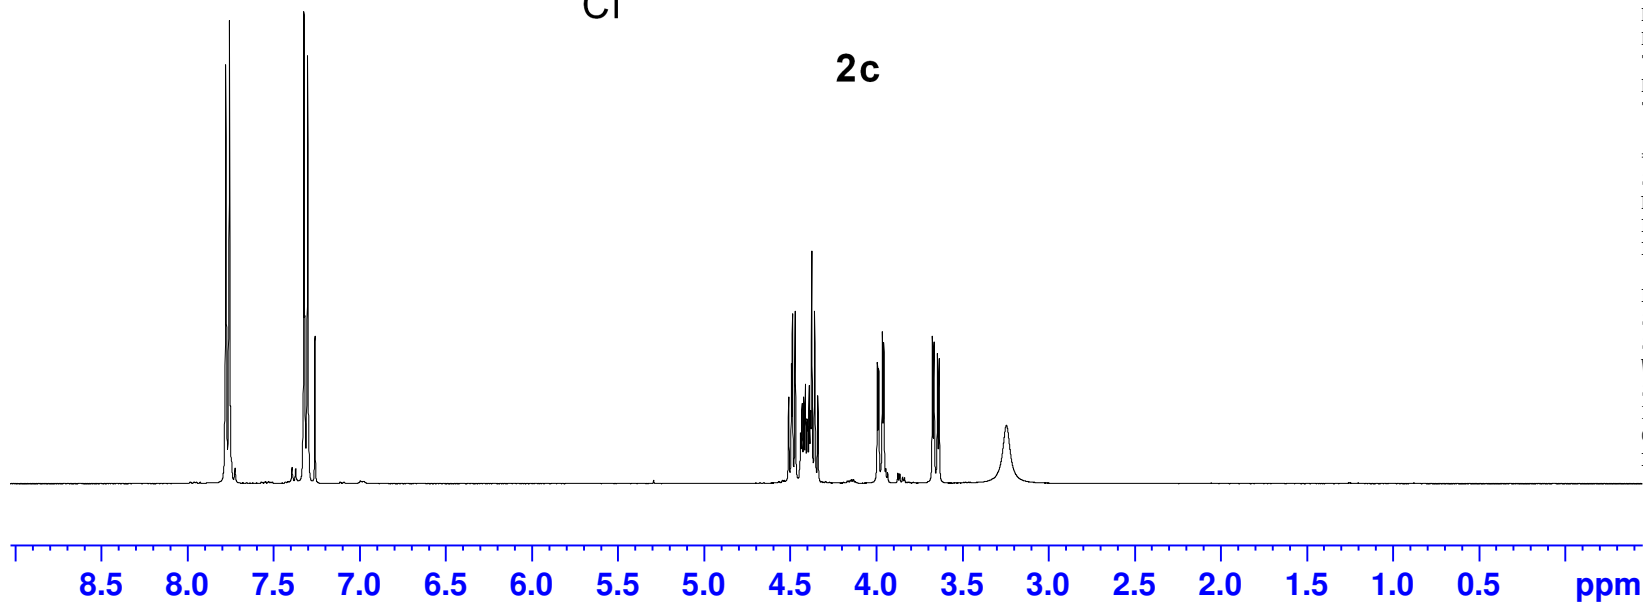

Current Data Parameters  
NAME YW-1736A  
EXPNO 1  
PROCNO 1

F2 - Acquisition Parameters  
Date\_ 20160416  
Time 10.11  
INSTRUM spect  
PROBHD 5 mm PABBO BB/  
PULPROG zg30  
TD 65536  
SOLVENT CDC13  
NS 16  
DS 0  
SWH 8012.820 Hz  
FIDRES 0.122266 Hz  
AQ 4.0894465 sec  
RG 112.31  
DW 62.400 usec  
DE 6.50 usec  
TE 298.3 K  
D1 1.00000000 sec  
TD0 1

==== CHANNEL f1 =====  
SFO1 400.1324710 MHz  
NUC1 1H  
P1 14.50 usec  
PLW1 11.99499989 W

F2 - Processing parameters  
SI 65536  
SF 400.1300094 MHz  
WDW EM  
SSB 0  
LB 0.30 Hz  
GB 0  
PC 1.00

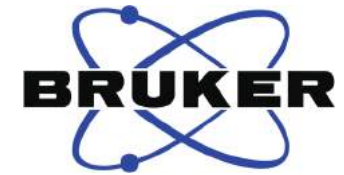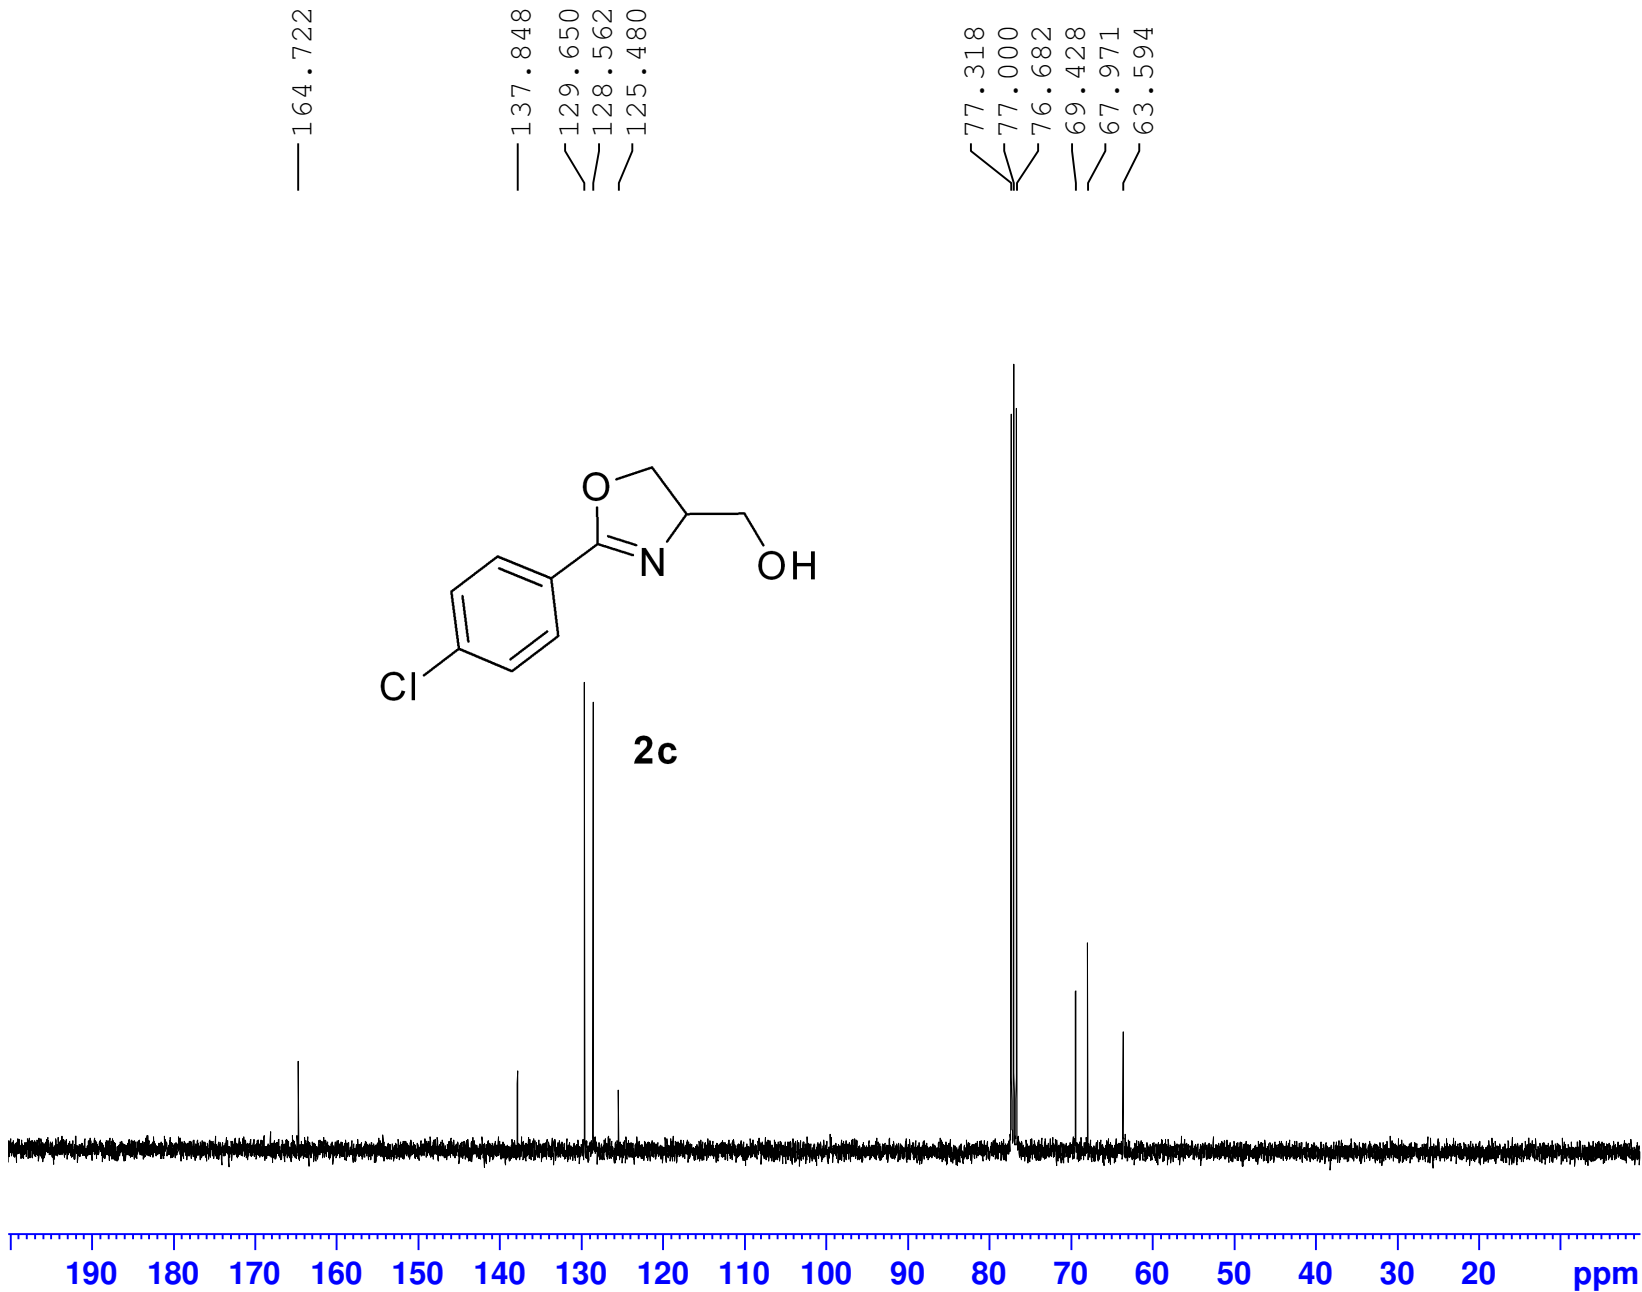

Current Data Parameters  
NAME YW-1736A-carbon  
EXPNO 1  
PROCNO 1

F2 - Acquisition Parameters  
Date\_ 20160416  
Time 10.17  
INSTRUM spect  
PROBHD 5 mm PABBO BB/  
PULPROG zgpg30  
TD 65536  
SOLVENT CDC13  
NS 75  
DS 0  
SWH 24038.461 Hz  
FIDRES 0.366798 Hz  
AQ 1.3631488 sec  
RG 196.92  
DW 20.800 usec  
DE 6.50 usec  
TE 299.1 K  
D1 2.00000000 sec  
D11 0.03000000 sec  
TD0 1

==== CHANNEL f1 =====  
SFO1 100.6228298 MHz  
NUC1 13C  
P1 9.70 usec  
PLW1 46.98899841 W

==== CHANNEL f2 =====  
SFO2 400.1316005 MHz  
NUC2 1H  
CPDPRG[2] waltz16  
PCPD2 90.00 usec  
PLW2 11.99499989 W  
PLW12 0.34213999 W  
PLW13 0.27713001 W

F2 - Processing parameters  
SI 32768  
SF 100.6127714 MHz  
WDW EM  
SSB 0  
LB 1.00 Hz  
GB 0  
PC 1.40





7.934  
7.913  
7.633  
7.612  
— 7.260

4.542  
4.526  
4.520  
4.504  
4.473  
4.464  
4.455  
4.445  
4.435  
4.431  
4.422  
4.414  
4.406  
4.390  
4.370  
3.993  
3.985  
3.964  
3.956  
3.692  
3.683  
3.663  
3.654  
3.152

Current Data Parameters  
NAME YW-1736B  
EXPNO 1  
PROCNO 1

F2 - Acquisition Parameters  
Date\_ 20160416  
Time 10.19  
INSTRUM spect  
PROBHD 5 mm PABBO BB/  
PULPROG zg30  
TD 65536  
SOLVENT CDC13  
NS 3  
DS 0  
SWH 8012.820 Hz  
FIDRES 0.122266 Hz  
AQ 4.0894465 sec  
RG 103.52  
DW 62.400 usec  
DE 6.50 usec  
TE 298.3 K  
D1 1.00000000 sec  
TD0 1

==== CHANNEL f1 =====  
SFO1 400.1324710 MHz  
NUC1 1H  
P1 14.50 usec  
PLW1 11.99499989 W

F2 - Processing parameters  
SI 65536  
SF 400.1300094 MHz  
WDW EM  
SSB 0  
LB 0.30 Hz  
GB 0  
PC 1.00

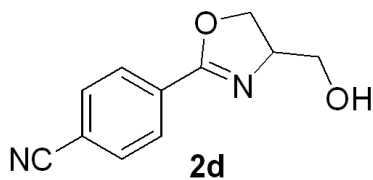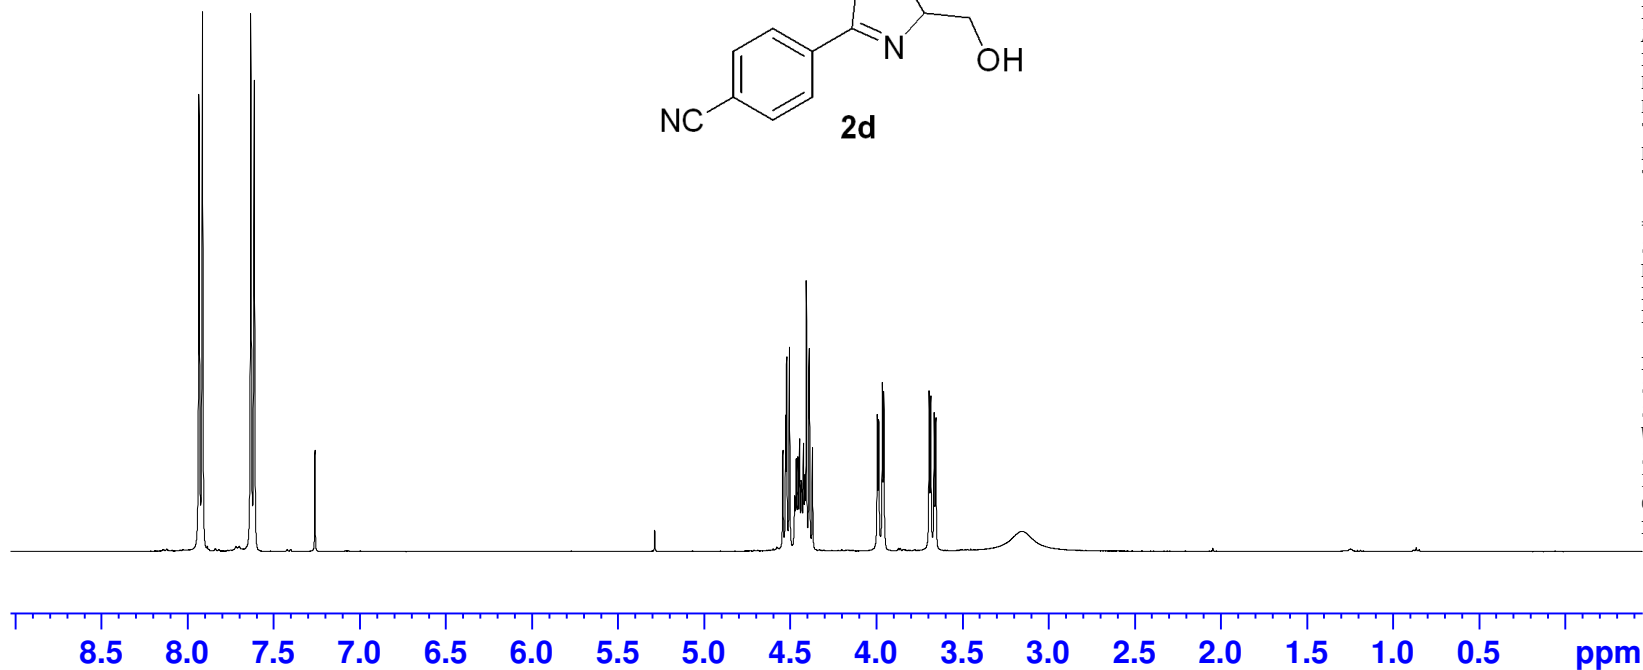

1.96  
1.93

0.95  
2.03  
1.01  
1.00  
0.91

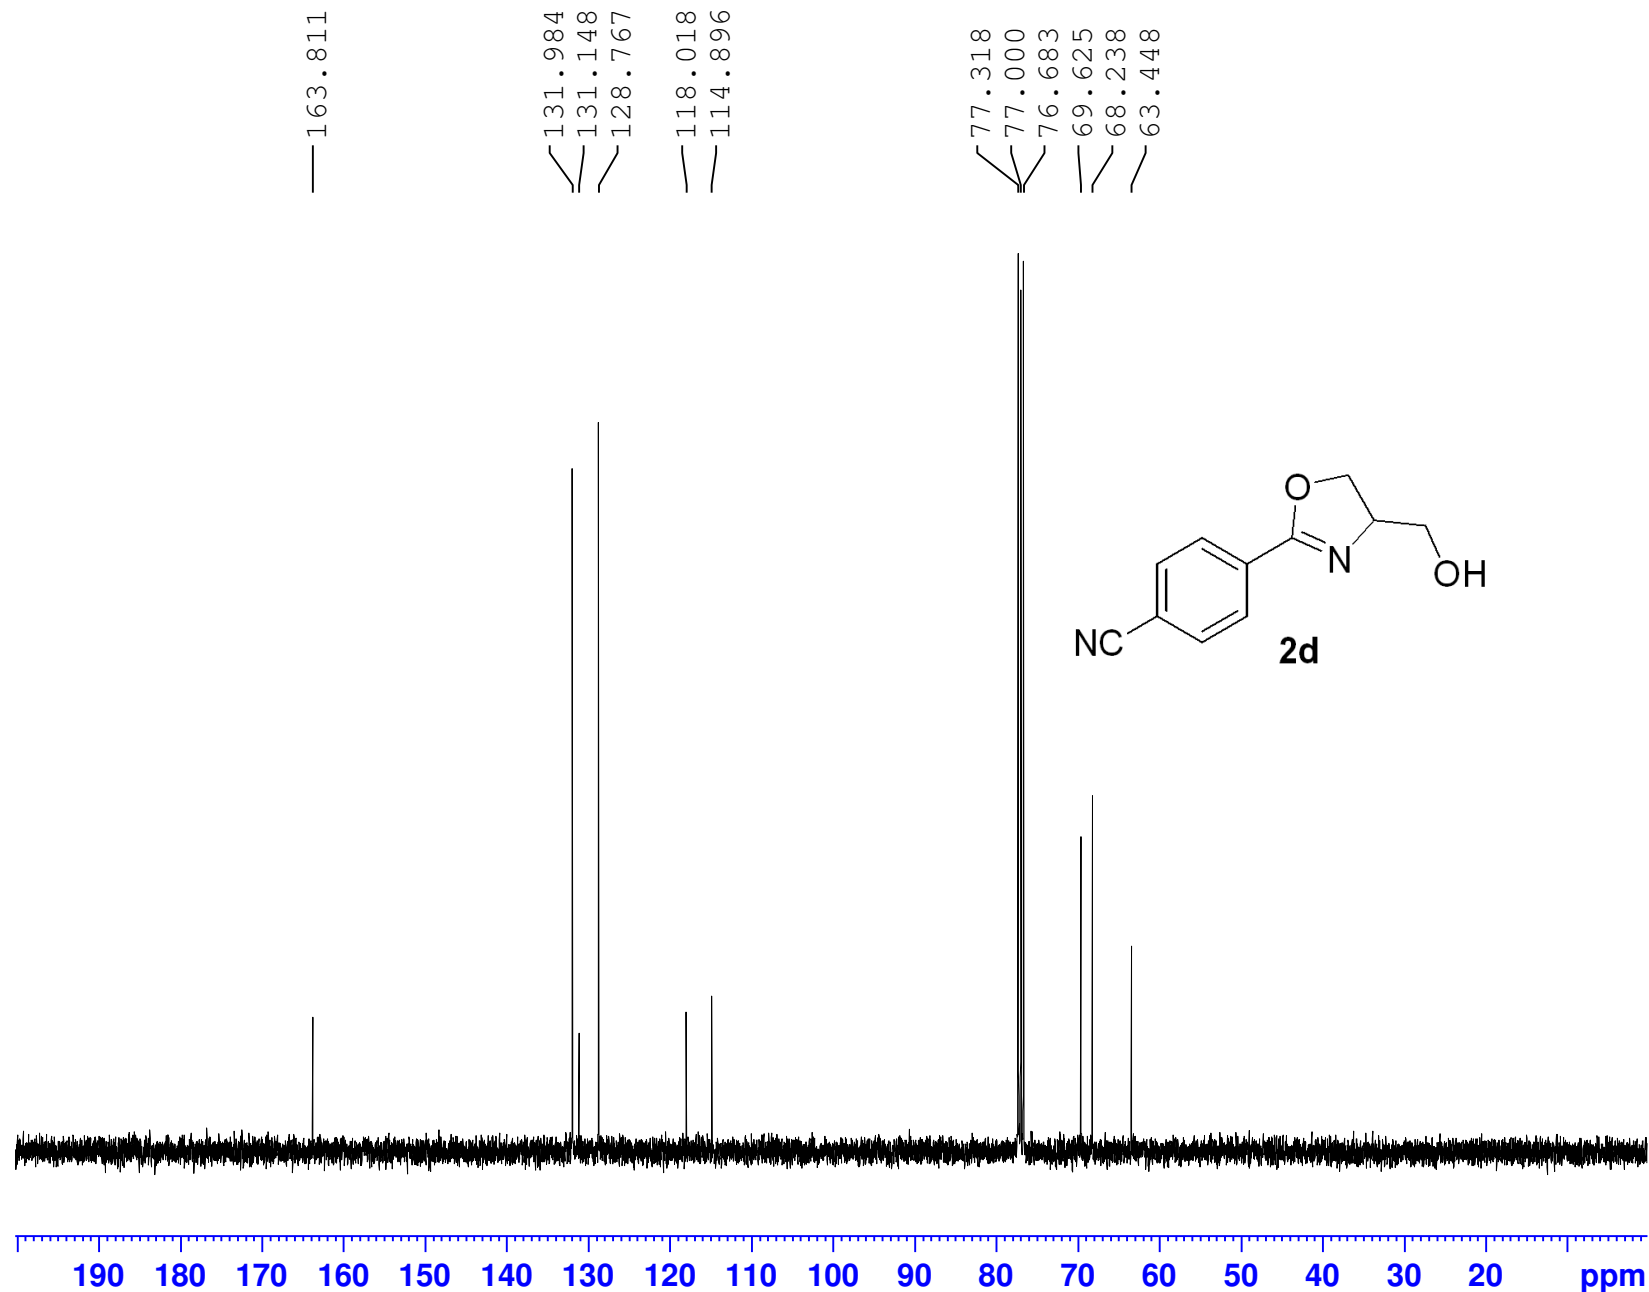

Current Data Parameters  
NAME YW-1736B-carbon  
EXPNO 1  
PROCNO 1

F2 - Acquisition Parameters  
Date\_ 20160416  
Time 10.22  
INSTRUM spect  
PROBHD 5 mm PABBO BB/  
PULPROG zgpg30  
TD 65536  
SOLVENT CDC13  
NS 37  
DS 0  
SWH 24038.461 Hz  
FIDRES 0.366798 Hz  
AQ 1.3631488 sec  
RG 196.92  
DW 20.800 usec  
DE 6.50 usec  
TE 299.0 K  
D1 2.00000000 sec  
D11 0.03000000 sec  
TD0 1

==== CHANNEL f1 =====  
SFO1 100.6228298 MHz  
NUC1 13C  
P1 9.70 usec  
PLW1 46.98899841 W

==== CHANNEL f2 =====  
SFO2 400.1316005 MHz  
NUC2 1H  
CPDPRG[2] waltz16  
PCPD2 90.00 usec  
PLW2 11.99499989 W  
PLW12 0.34213999 W  
PLW13 0.27713001 W

F2 - Processing parameters  
SI 32768  
SF 100.6127747 MHz  
WDW EM  
SSB 0  
LB 1.00 Hz  
GB 0  
PC 1.40



8.219  
8.197  
8.062  
8.040

7.260

4.588  
4.570  
4.564  
4.547  
4.519  
4.509  
4.500  
4.490  
4.480  
4.477  
4.467  
4.457  
4.435  
4.417  
4.398  
4.007  
3.998  
3.978  
3.969  
3.720  
3.710  
3.691  
3.681  
2.785

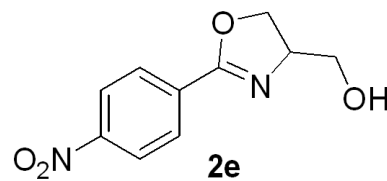

Current Data Parameters  
NAME YW-1738B  
EXPNO 1  
PROCNO 1

F2 - Acquisition Parameters  
Date\_ 20160418  
Time 21.06  
INSTRUM spect  
PROBHD 5 mm PABBO BB/  
PULPROG zg30  
TD 65536  
SOLVENT CDC13  
NS 7  
DS 0  
SWH 8012.820 Hz  
FIDRES 0.122266 Hz  
AQ 4.0894465 sec  
RG 112.31  
DW 62.400 usec  
DE 6.50 usec  
TE 296.6 K  
D1 1.00000000 sec  
TD0 1

==== CHANNEL f1 =====  
SFO1 400.1324710 MHz  
NUC1 1H  
P1 14.50 usec  
PLW1 11.99499989 W

F2 - Processing parameters  
SI 65536  
SF 400.1300095 MHz  
WDW EM  
SSB 0  
LB 0.30 Hz  
GB 0  
PC 1.00

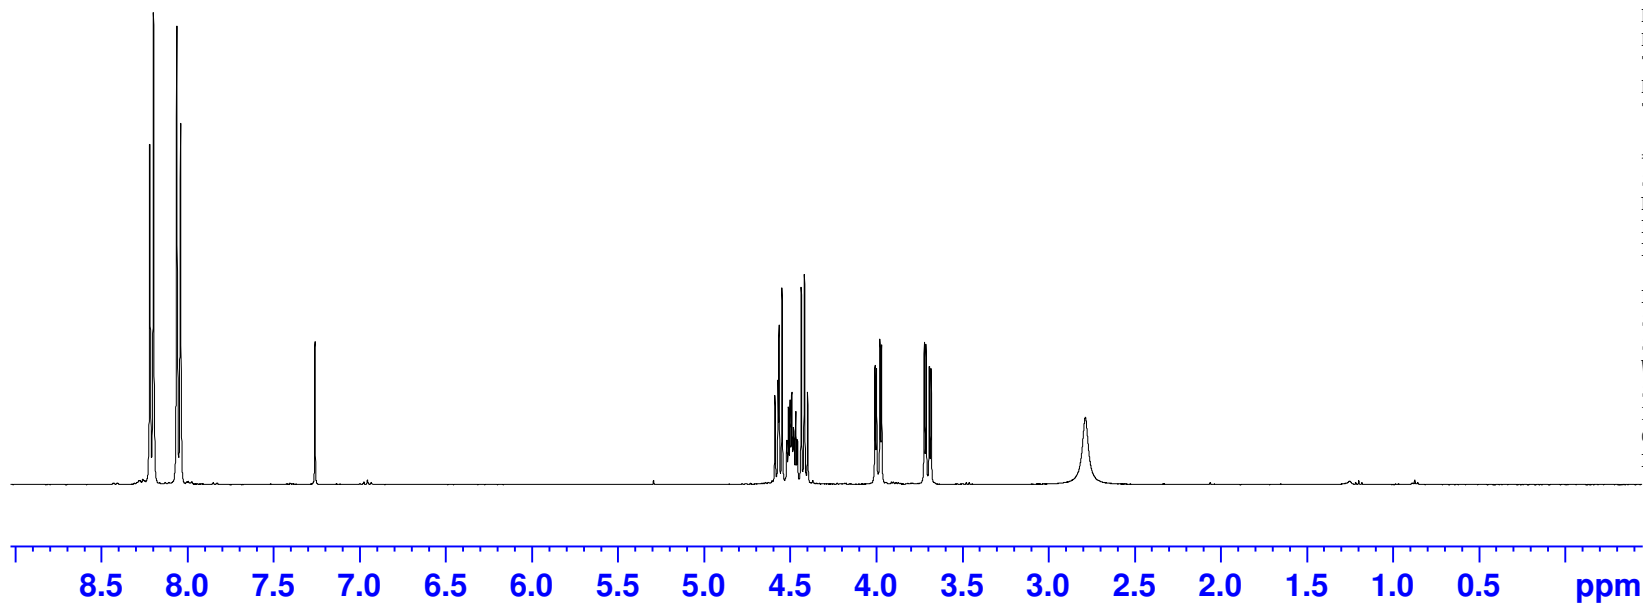

1.94  
1.94

0.97  
1.06  
0.98

1.01  
1.00

1.13



— 163.696  
— 149.610  
— 132.798  
— 129.378  
— 123.469

77.319  
77.001  
76.684  
69.866  
68.274  
63.636

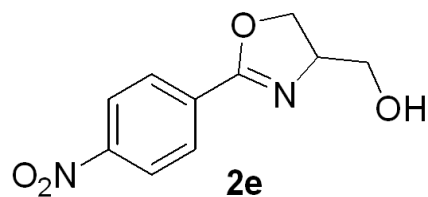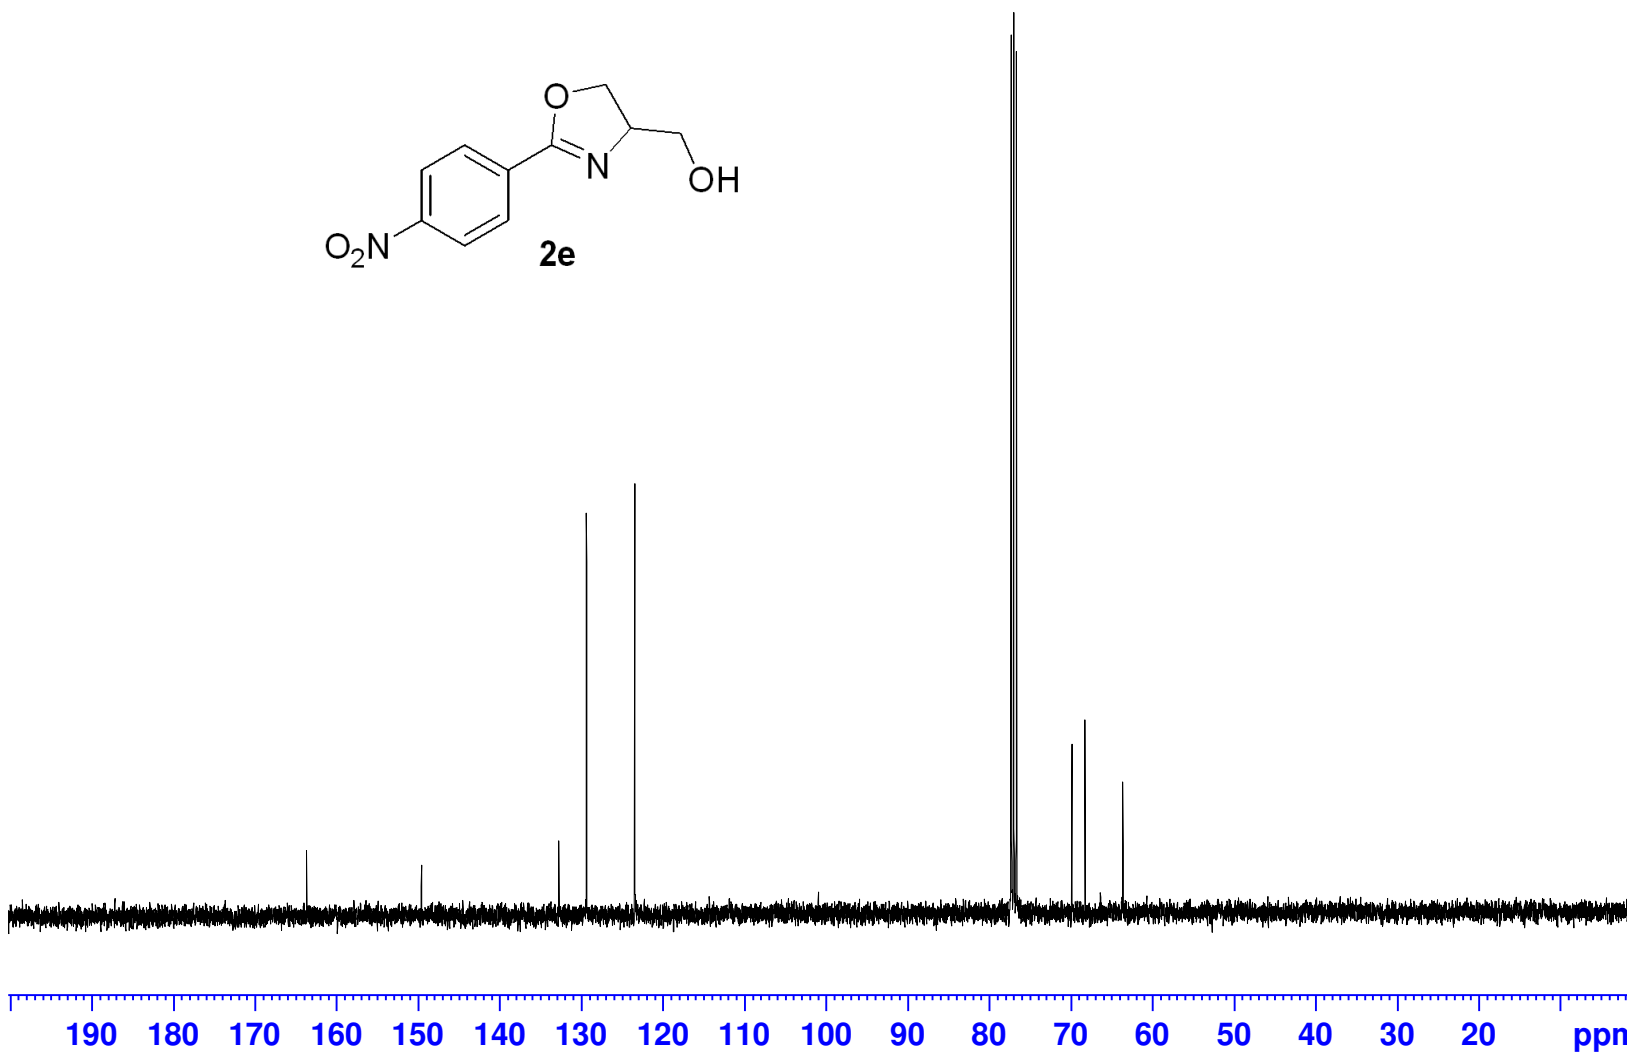

Current Data Parameters  
NAME YW-1738B-carbon  
EXPNO 1  
PROCNO 1

F2 - Acquisition Parameters  
Date\_ 20160418  
Time 21.10  
INSTRUM spect  
PROBHD 5 mm PABBO BB/  
PULPROG zgpg30  
TD 65536  
SOLVENT CDC13  
NS 65  
DS 0  
SWH 24038.461 Hz  
FIDRES 0.366798 Hz  
AQ 1.3631488 sec  
RG 196.92  
DW 20.800 usec  
DE 6.50 usec  
TE 297.6 K  
D1 2.00000000 sec  
D11 0.03000000 sec  
TD0 1

==== CHANNEL f1 =====  
SFO1 100.6228298 MHz  
NUC1 13C  
P1 9.70 usec  
PLW1 46.98899841 W

==== CHANNEL f2 =====  
SFO2 400.1316005 MHz  
NUC2 1H  
CPDPRG[2] waltz16  
PCPD2 90.00 usec  
PLW2 11.99499989 W  
PLW12 0.34213999 W  
PLW13 0.27713001 W

F2 - Processing parameters  
SI 32768  
SF 100.6127722 MHz  
WDW EM  
SSB 0  
LB 1.00 Hz  
GB 0  
PC 1.40



7.724  
7.704  
7.325  
7.322  
7.303  
7.288  
7.285  
7.195  
7.175  
7.155

4.397  
4.380  
4.372  
4.364  
4.354  
4.340  
4.247  
4.215  
4.208  
4.182  
3.797  
3.787  
3.768  
3.759  
3.625  
3.615  
3.596  
3.587  
3.561  
2.489

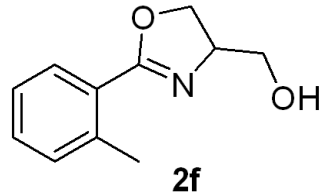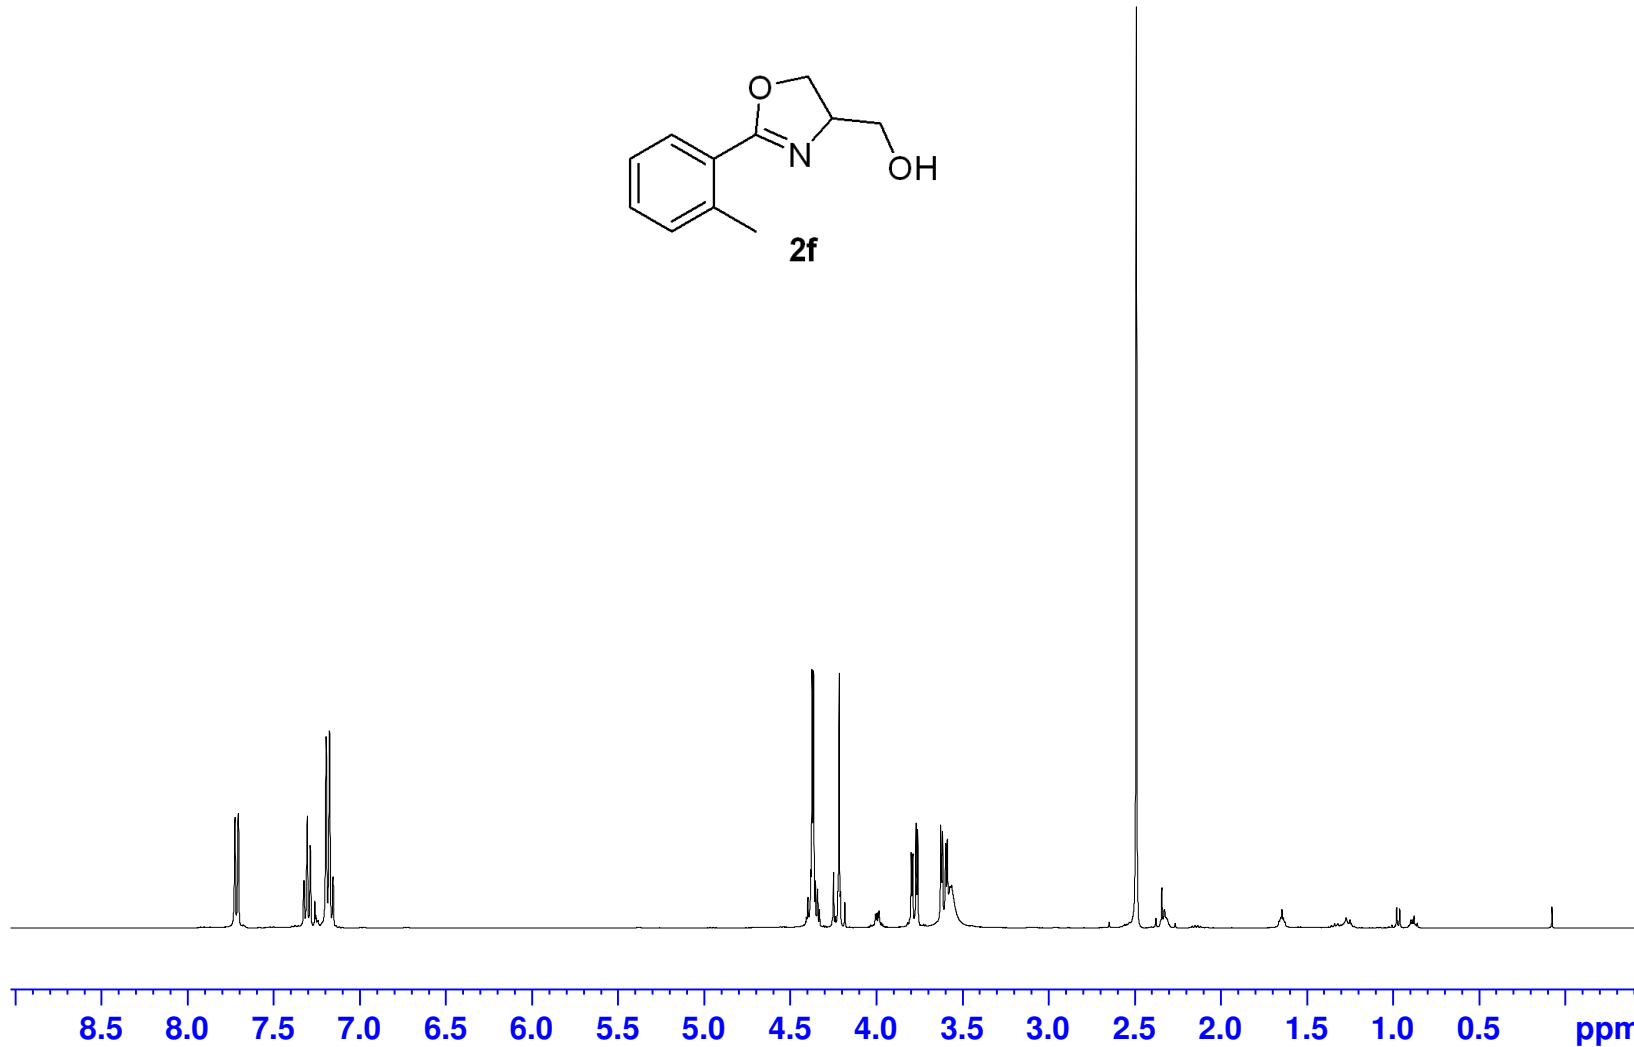

Current Data Parameters  
NAME YW-1735A  
EXPNO 1  
PROCNO 1

F2 - Acquisition Parameters  
Date\_ 20160416  
Time 20.10  
INSTRUM spect  
PROBHD 5 mm PABBO BB/  
PULPROG zg30  
TD 65536  
SOLVENT CDC13  
NS 3  
DS 0  
SWH 8012.820 Hz  
FIDRES 0.122266 Hz  
AQ 4.0894465 sec  
RG 27.78  
DW 62.400 usec  
DE 6.50 usec  
TE 298.6 K  
D1 1.00000000 sec  
TD0 1

==== CHANNEL f1 =====  
SFO1 400.1324710 MHz  
NUC1 1H  
P1 14.50 usec  
PLW1 11.99499989 W

F2 - Processing parameters  
SI 65536  
SF 400.1300091 MHz  
WDW EM  
SSB 0  
LB 0.30 Hz  
GB 0  
PC 1.00



—166.210

138.380  
131.029  
130.639  
129.732  
126.843  
125.456

77.321  
77.002  
76.684  
68.936  
68.100  
63.901

—21.376

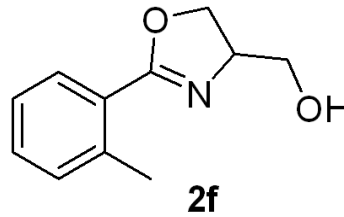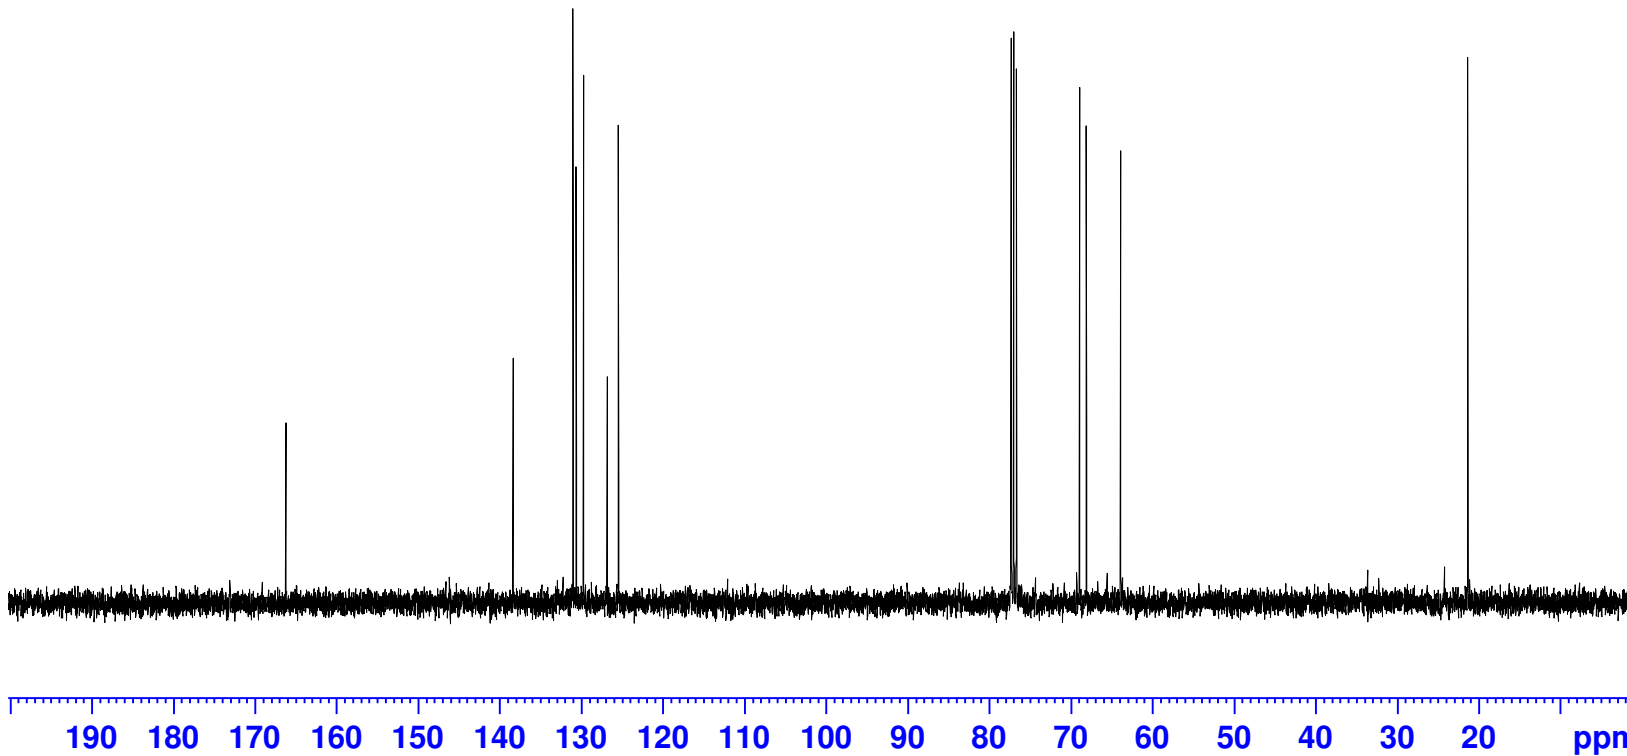

Current Data Parameters  
NAME YW-1735A-carbon  
EXPNO 1  
PROCNO 1

F2 - Acquisition Parameters  
Date\_ 20160416  
Time 20.12  
INSTRUM spect  
PROBHD 5 mm PABBO BB/  
PULPROG zgpg30  
TD 65536  
SOLVENT CDC13  
NS 9  
DS 0  
SWH 24038.461 Hz  
FIDRES 0.366798 Hz  
AQ 1.3631488 sec  
RG 196.92  
DW 20.800 usec  
DE 6.50 usec  
TE 298.9 K  
D1 2.0000000 sec  
D11 0.0300000 sec  
TD0 1

==== CHANNEL f1 =====  
SFO1 100.6228298 MHz  
NUC1 13C  
P1 9.70 usec  
PLW1 46.98899841 W

==== CHANNEL f2 =====  
SFO2 400.1316005 MHz  
NUC2 1H  
CPDPRG[2] waltz16  
PCPD2 90.00 usec  
PLW2 11.99499989 W  
PLW12 0.34213999 W  
PLW13 0.27713001 W

F2 - Processing parameters  
SI 32768  
SF 100.6127831 MHz  
WDW EM  
SSB 0  
LB 1.00 Hz  
GB 0  
PC 1.40



Current Data Parameters  
NAME YW-1735B  
EXPNO 2  
PROCNO 1

F2 - Acquisition Parameters  
Date\_ 20160416  
Time 10.04  
INSTRUM spect  
PROBHD 5 mm PABBO BB/  
PULPROG zg30  
TD 65536  
SOLVENT CDC13  
NS 4  
DS 0  
SWH 8012.820 Hz  
FIDRES 0.122266 Hz  
AQ 4.0894465 sec  
RG 49.32  
DW 62.400 usec  
DE 6.50 usec  
TE 298.5 K  
D1 1.00000000 sec  
TD0 1

==== CHANNEL f1 =====  
SFO1 400.1324710 MHz  
NUC1 1H  
P1 14.50 usec  
PLW1 11.99499989 W

F2 - Processing parameters  
SI 65536  
SF 400.1300093 MHz  
WDW EM  
SSB 0  
LB 0.30 Hz  
GB 0  
PC 1.00

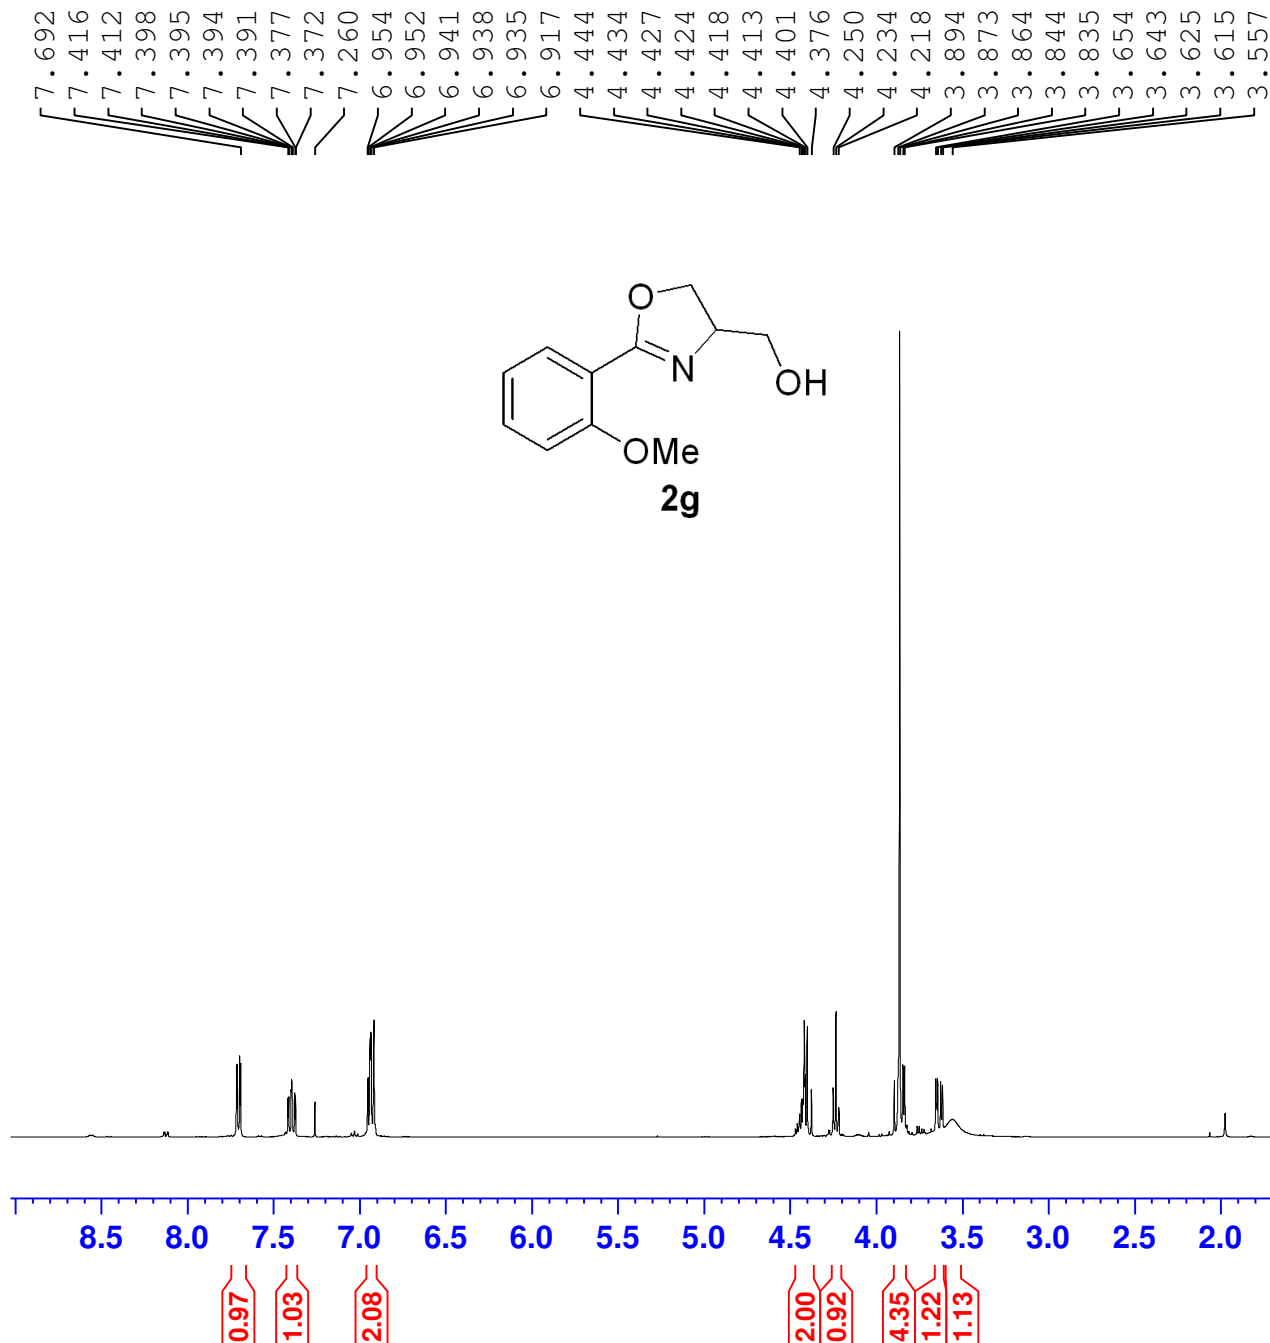



— 163.985  
— 158.291

— 132.516  
— 131.126  
— 120.178  
— 116.414  
— 111.526

— 77.318  
— 77.000  
— 76.682  
— 68.726  
— 68.330  
— 63.999  
— 55.791

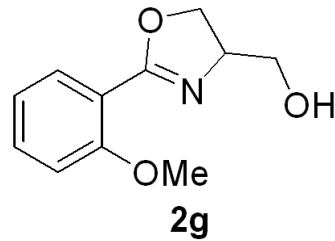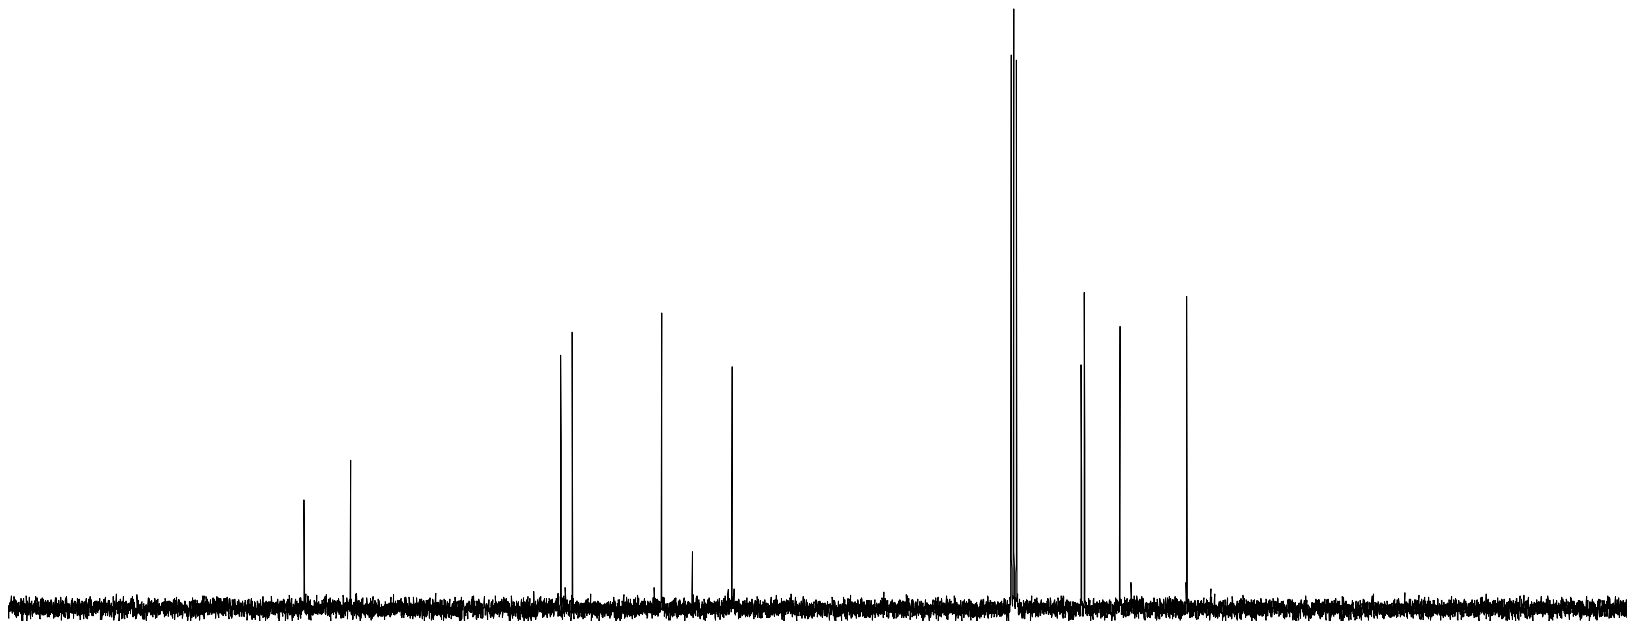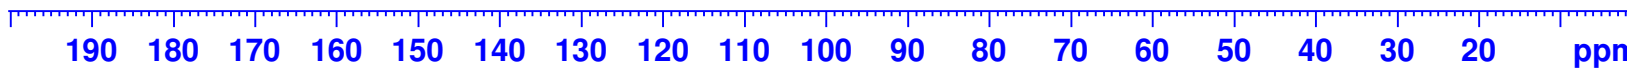

Current Data Parameters  
NAME YW-1735B-carbon  
EXPNO 2  
PROCNO 1

F2 - Acquisition Parameters  
Date\_ 20160416  
Time 10.06  
INSTRUM spect  
PROBHD 5 mm PABBO BB/  
PULPROG zgpg30  
TD 65536  
SOLVENT CDC13  
NS 26  
DS 0  
SWH 24038.461 Hz  
FIDRES 0.366798 Hz  
AQ 1.3631488 sec  
RG 196.92  
DW 20.800 usec  
DE 6.50 usec  
TE 299.1 K  
D1 2.00000000 sec  
D11 0.03000000 sec  
TD0 1

==== CHANNEL f1 =====  
SFO1 100.6228298 MHz  
NUC1 13C  
P1 9.70 usec  
PLW1 46.98899841 W

==== CHANNEL f2 =====  
SFO2 400.1316005 MHz  
NUC2 1H  
CPDPRG[2] waltz16  
PCPD2 90.00 usec  
PLW2 11.99499989 W  
PLW12 0.34213999 W  
PLW13 0.27713001 W

F2 - Processing parameters  
SI 32768  
SF 100.6127780 MHz  
WDW EM  
SSB 0  
LB 1.00 Hz  
GB 0  
PC 1.40





Current Data Parameters  
NAME YW-1726A  
EXPNO 1  
PROCNO 2

F2 - Acquisition Parameters  
Date\_ 20160413  
Time 14.43  
INSTRUM spect  
PROBHD 5 mm PABBO BB/  
PULPROG zg30  
TD 65536  
SOLVENT CDC13  
NS 3  
DS 0  
SWH 8012.820 Hz  
FIDRES 0.122266 Hz  
AQ 4.0894465 sec  
RG 39.46  
DW 62.400 usec  
DE 6.50 usec  
TE 296.7 K  
D1 1.00000000 sec  
TD0 1

==== CHANNEL f1 =====  
SFO1 400.1324710 MHz  
NUC1 1H  
P1 14.50 usec  
PLW1 11.99499989 W

F2 - Processing parameters  
SI 65536  
SF 400.1300092 MHz  
WDW EM  
SSB 0  
LB 0.30 Hz  
GB 0  
PC 1.00

7.590  
7.587  
7.327  
7.324  
7.308  
7.305  
7.290  
7.286  
7.275  
7.270  
7.260  
7.256  
7.251  
7.237  
7.232  
4.468  
4.451  
4.443  
4.428  
4.423  
4.414  
4.408  
4.397  
4.384  
4.373  
4.299  
4.284  
4.269  
3.828  
3.818  
3.799  
3.789  
3.641  
3.631  
3.613  
3.609  
3.602  
3.317

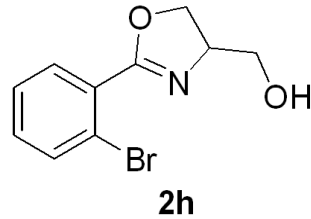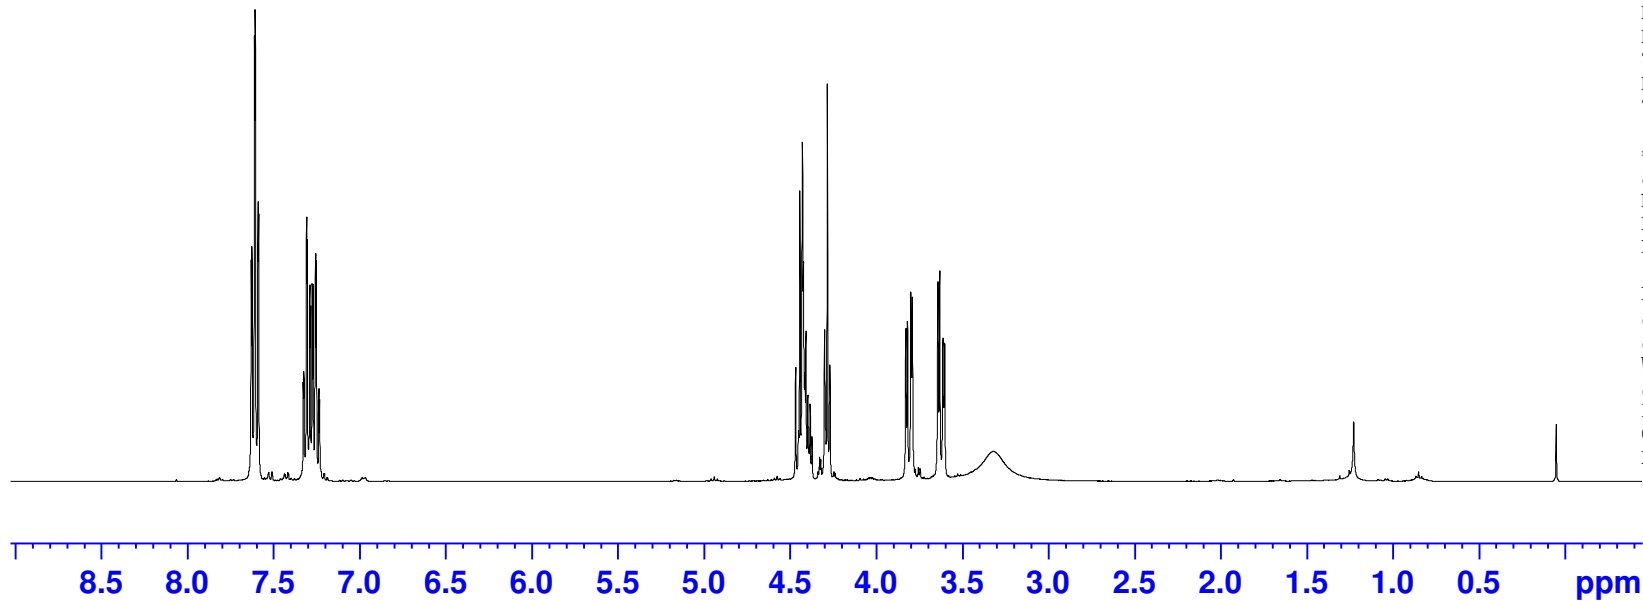

2.00  
2.16

2.05  
0.96  
1.05  
1.13  
1.36

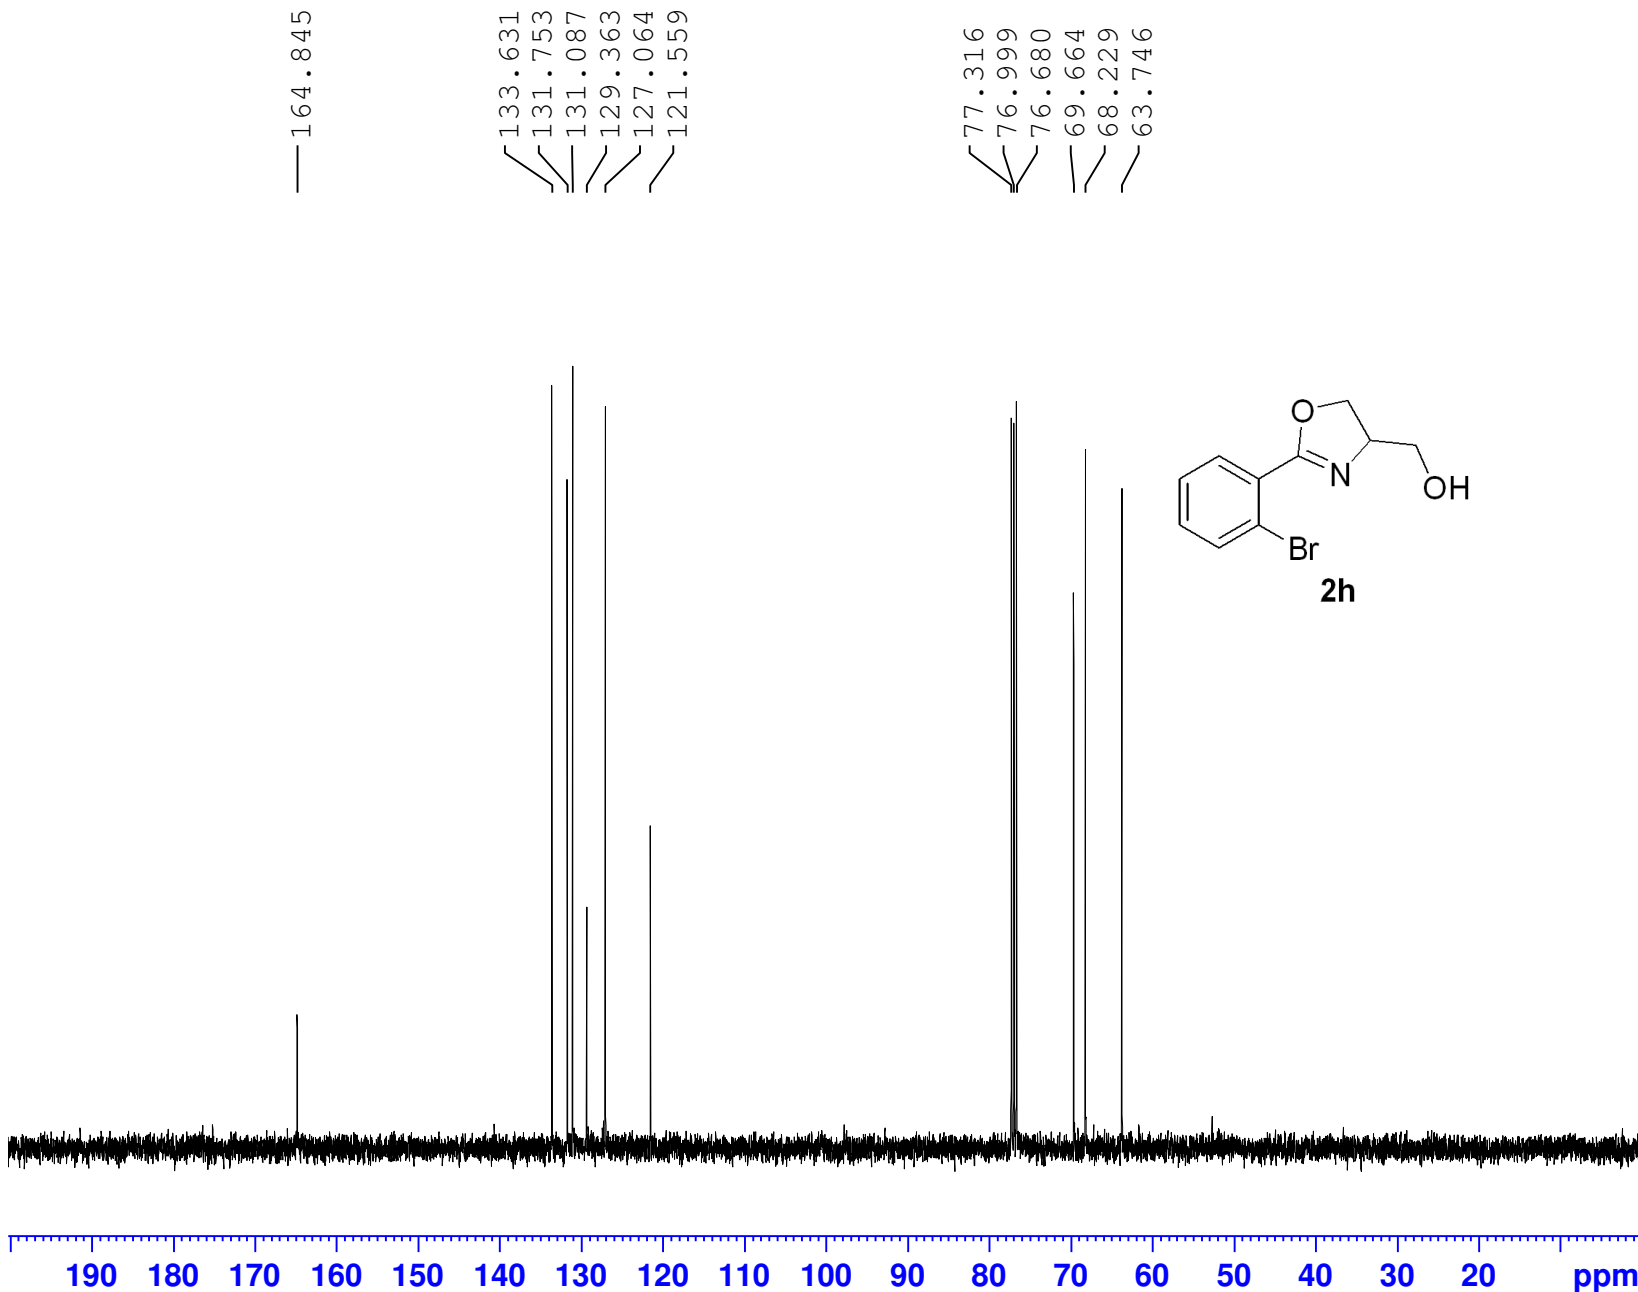

Current Data Parameters  
NAME YW-1726A-carbon  
EXPNO 1  
PROCNO 2

F2 - Acquisition Parameters  
Date\_ 20160413  
Time 14.44  
INSTRUM spect  
PROBHD 5 mm PABBO BB/  
PULPROG zgpg30  
TD 65536  
SOLVENT CDC13  
NS 22  
DS 0  
SWH 24038.461 Hz  
FIDRES 0.366798 Hz  
AQ 1.3631488 sec  
RG 196.92  
DW 20.800 usec  
DE 6.50 usec  
TE 297.3 K  
D1 2.0000000 sec  
D11 0.0300000 sec  
TD0 1

==== CHANNEL f1 =====  
SFO1 100.6228298 MHz  
NUC1 13C  
P1 9.70 usec  
PLW1 46.98899841 W

==== CHANNEL f2 =====  
SFO2 400.1316005 MHz  
NUC2 1H  
CPDPRG[2] waltz16  
PCPD2 90.00 usec  
PLW2 11.99499989 W  
PLW12 0.34213999 W  
PLW13 0.27713001 W

F2 - Processing parameters  
SI 32768  
SF 100.6127830 MHz  
WDW EM  
SSB 0  
LB 1.00 Hz  
GB 0  
PC 1.40



Current Data Parameters  
NAME YW-1726B  
EXPNO 3  
PROCNO 1

F2 - Acquisition Parameters  
Date\_ 20160414  
Time 20.05  
INSTRUM spect  
PROBHD 5 mm PABBO BB/  
PULPROG zg30  
TD 65536  
SOLVENT CDC13  
NS 11  
DS 0  
SWH 8012.820 Hz  
FIDRES 0.122266 Hz  
AQ 4.0894465 sec  
RG 70.97  
DW 62.400 usec  
DE 6.50 usec  
TE 296.5 K  
D1 1.00000000 sec  
TD0 1

==== CHANNEL f1 =====  
SFO1 400.1324710 MHz  
NUC1 1H  
P1 14.50 usec  
PLW1 11.99499989 W

F2 - Processing parameters  
SI 65536  
SF 400.1300094 MHz  
WDW EM  
SSB 0  
LB 0.30 Hz  
GB 0  
PC 1.00

7.585  
7.581  
7.395  
7.392  
7.376  
7.373  
7.357  
7.354  
7.260  
7.136  
7.132  
7.117  
7.113  
7.097  
7.093  
4.523  
4.499  
4.485  
4.477  
4.472  
4.462  
4.448  
4.349  
4.343  
4.337  
4.329  
4.324  
3.934  
3.926  
3.906  
3.901  
3.897  
3.688  
3.677  
3.659  
3.653  
3.648  
2.614

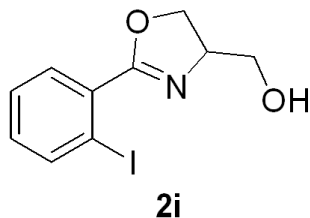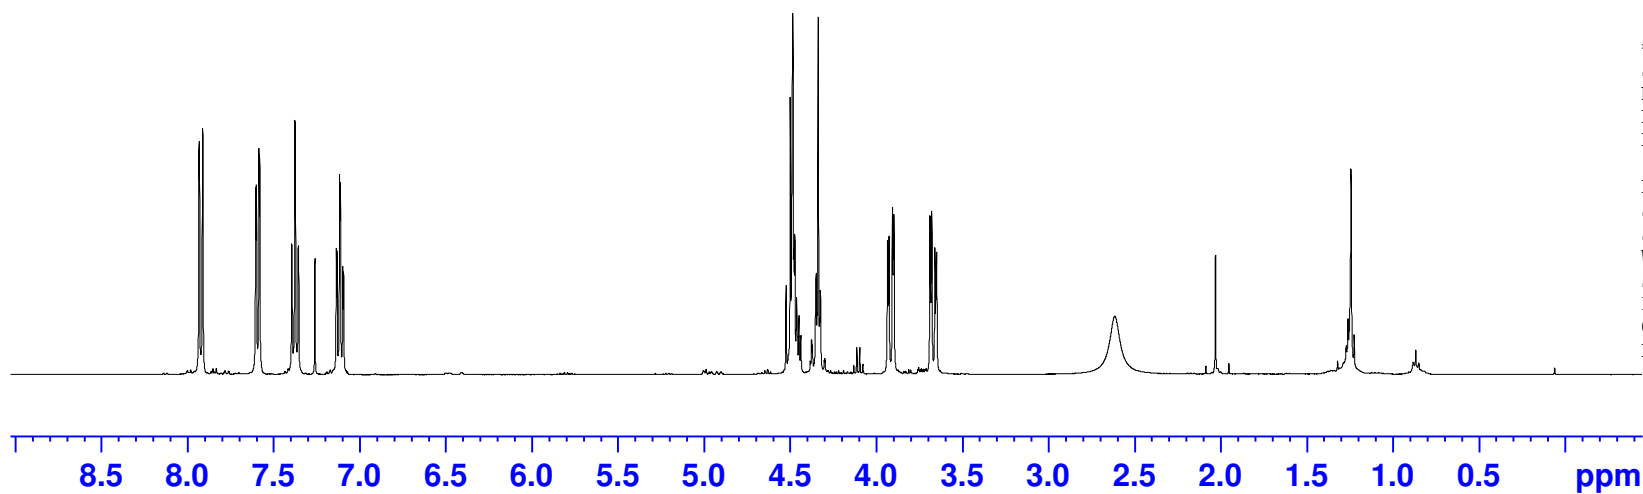



— 166.011

— 140.338  
— 133.240  
— 131.825  
— 130.513  
— 127.886

— 94.761

— 77.315  
— 76.998  
— 76.680  
— 69.678  
— 68.273  
— 63.957

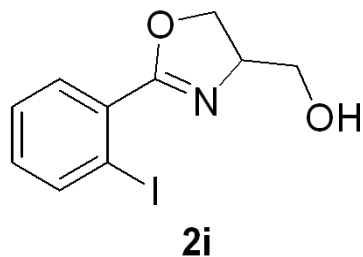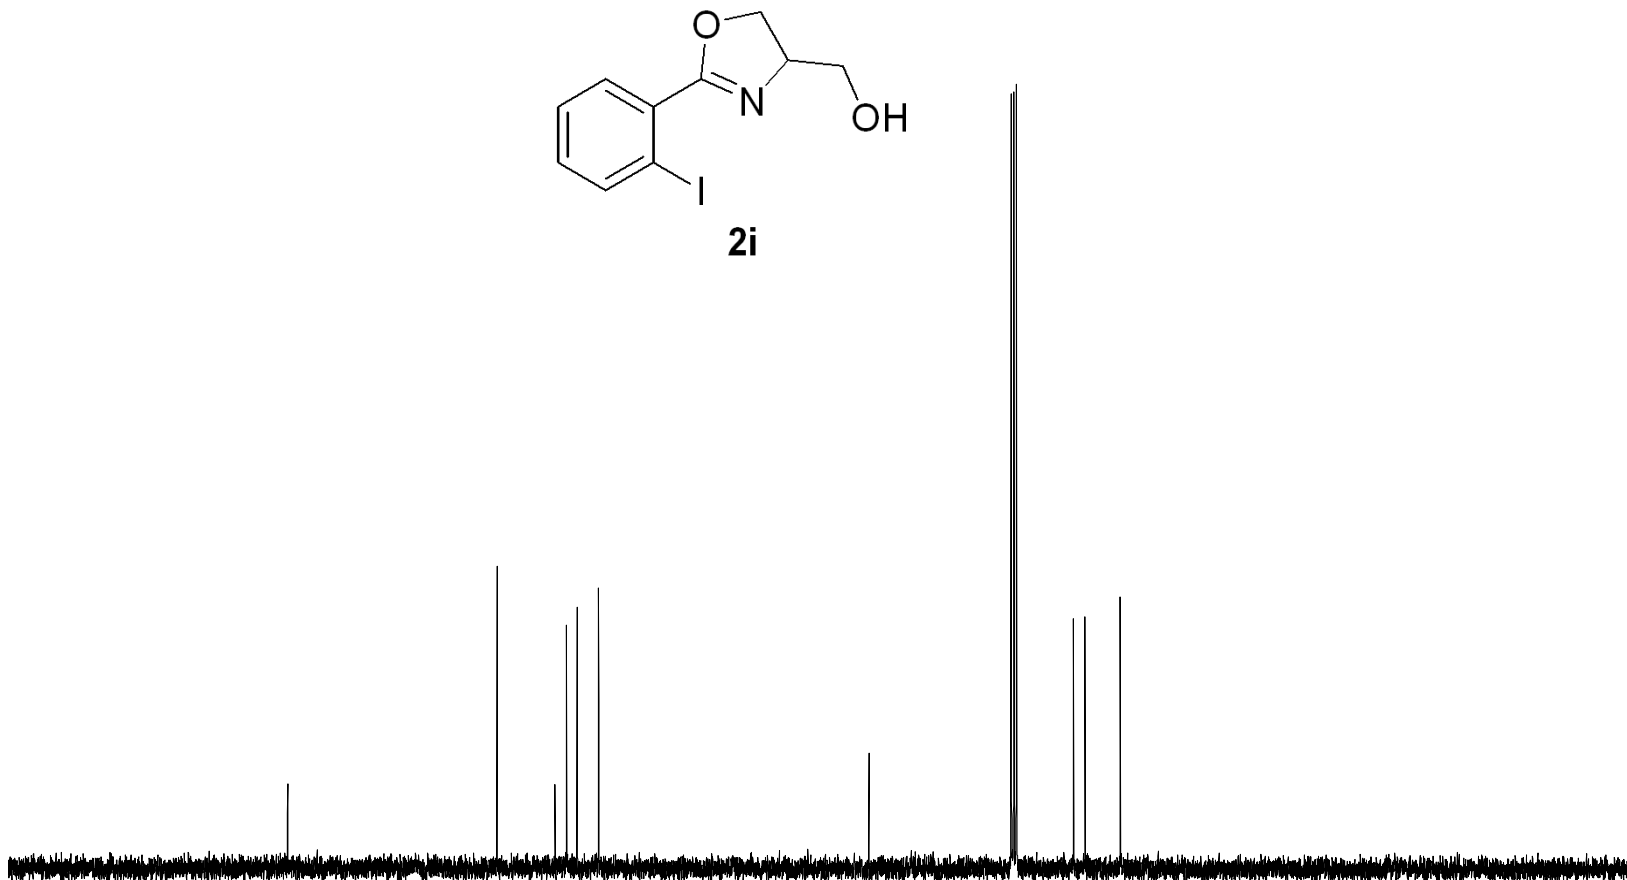

Current Data Parameters  
NAME YW-1726B-carbon  
EXPNO 4  
PROCNO 1

F2 - Acquisition Parameters  
Date\_ 20160414  
Time 20.09  
INSTRUM spect  
PROBHD 5 mm PABBO BB/  
PULPROG zgpg30  
TD 65536  
SOLVENT CDC13  
NS 29  
DS 0  
SWH 24038.461 Hz  
FIDRES 0.366798 Hz  
AQ 1.3631488 sec  
RG 196.92  
DW 20.800 usec  
DE 6.50 usec  
TE 297.2 K  
D1 2.00000000 sec  
D11 0.03000000 sec  
TD0 1

==== CHANNEL f1 =====  
SFO1 100.6228298 MHz  
NUC1 13C  
P1 9.70 usec  
PLW1 46.98899841 W

==== CHANNEL f2 =====  
SFO2 400.1316005 MHz  
NUC2 1H  
CPDPRG[2] waltz16  
PCPD2 90.00 usec  
PLW2 11.99499989 W  
PLW12 0.34213999 W  
PLW13 0.27713001 W

F2 - Processing parameters  
SI 32768  
SF 100.6127766 MHz  
WDW EM  
SSB 0  
LB 1.00 Hz  
GB 0  
PC 1.40



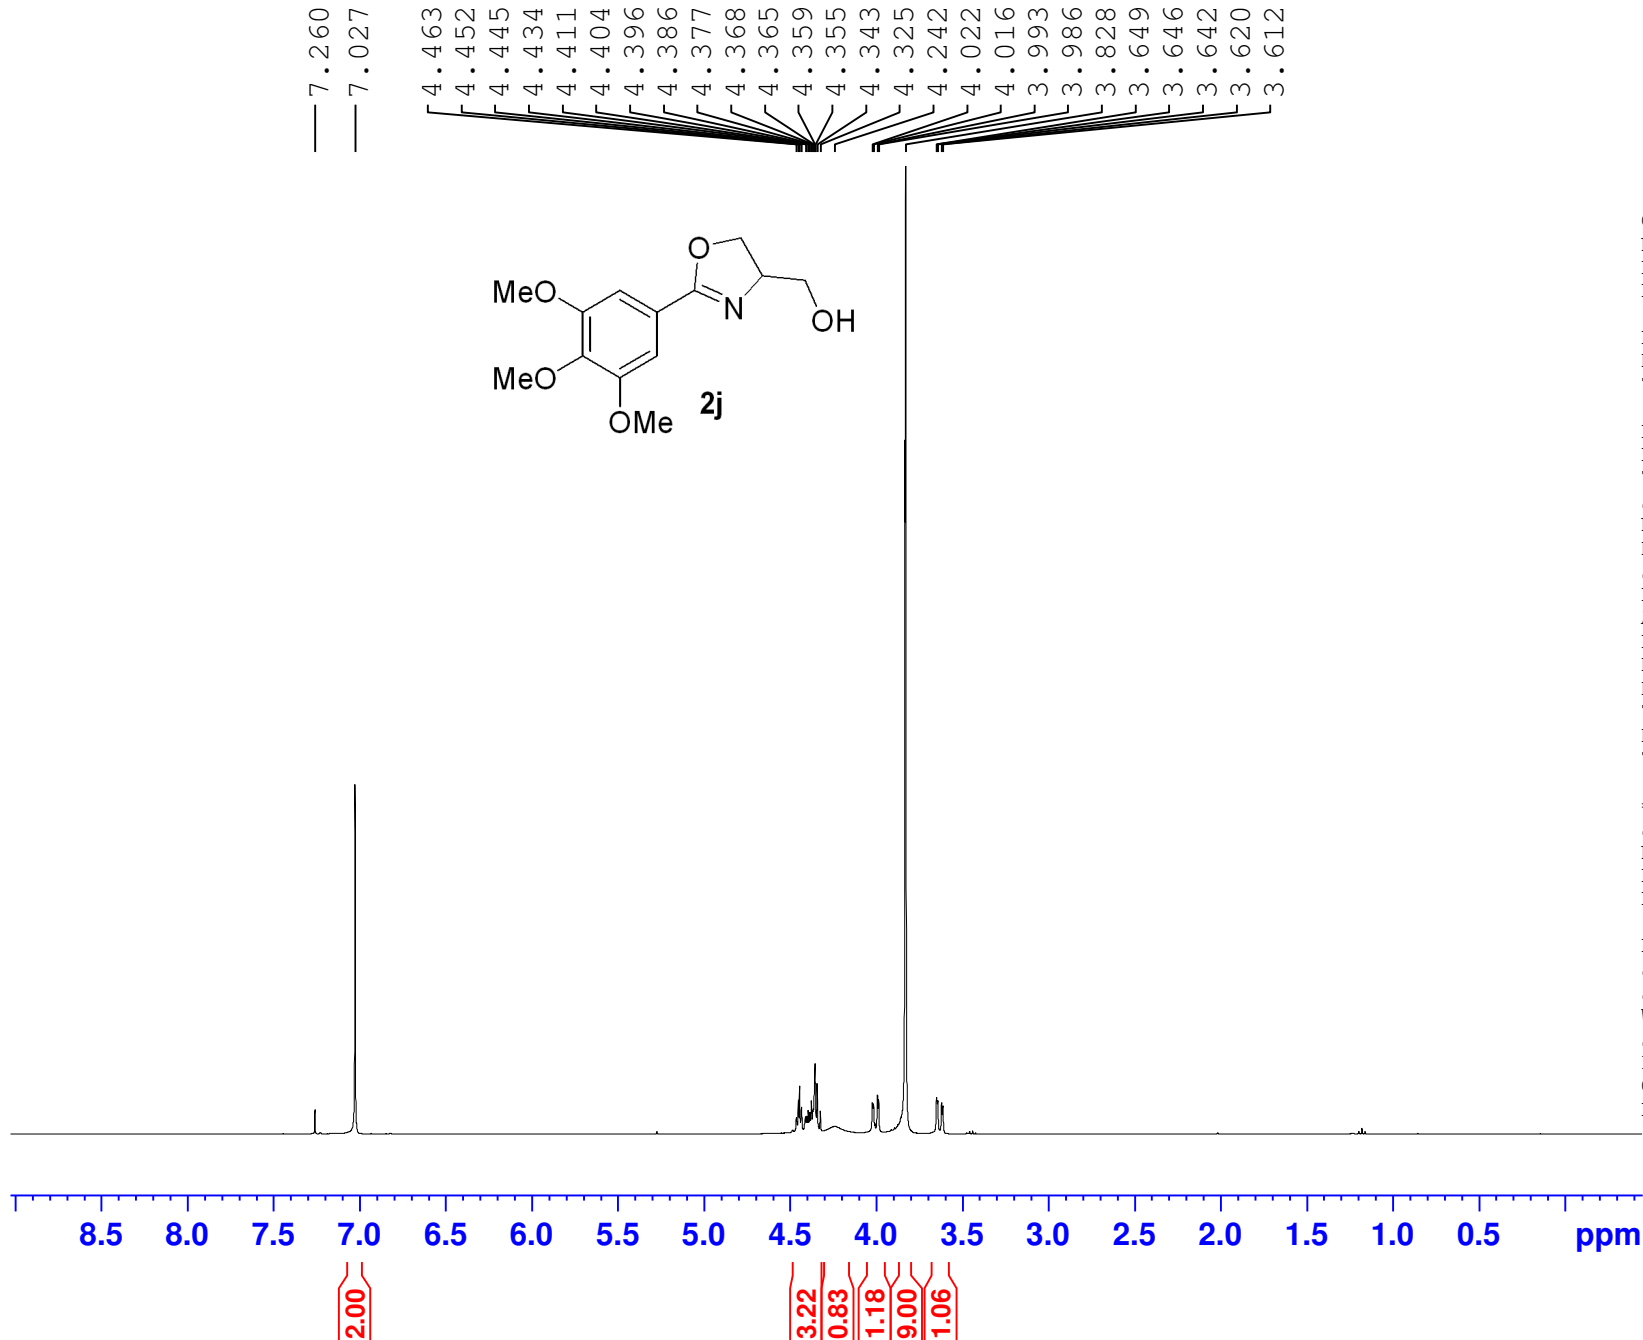

Current Data Parameters  
NAME YW-1735C  
EXPNO 3  
PROCNO 1

F2 - Acquisition Parameters  
Date\_ 20160415  
Time 14.45  
INSTRUM spect  
PROBHD 5 mm PABBO BB/  
PULPROG zg30  
TD 65536  
SOLVENT CDC13  
NS 4  
DS 0  
SWH 8012.820 Hz  
FIDRES 0.122266 Hz  
AQ 4.0894465 sec  
RG 49.32  
DW 62.400 usec  
DE 6.50 usec  
TE 296.8 K  
D1 1.00000000 sec  
TD0 1

==== CHANNEL f1 =====  
SFO1 400.1324710 MHz  
NUC1 1H  
P1 14.50 usec  
PLW1 11.99499989 W

F2 - Processing parameters  
SI 65536  
SF 400.1300092 MHz  
WDW EM  
SSB 0  
LB 0.30 Hz  
GB 0  
PC 1.00



— 165.288  
— 152.674  
— 140.706  
— 121.943  
— 105.376  
77.319  
77.001  
76.683  
69.210  
67.829  
63.263  
60.761  
56.030

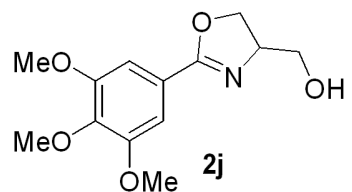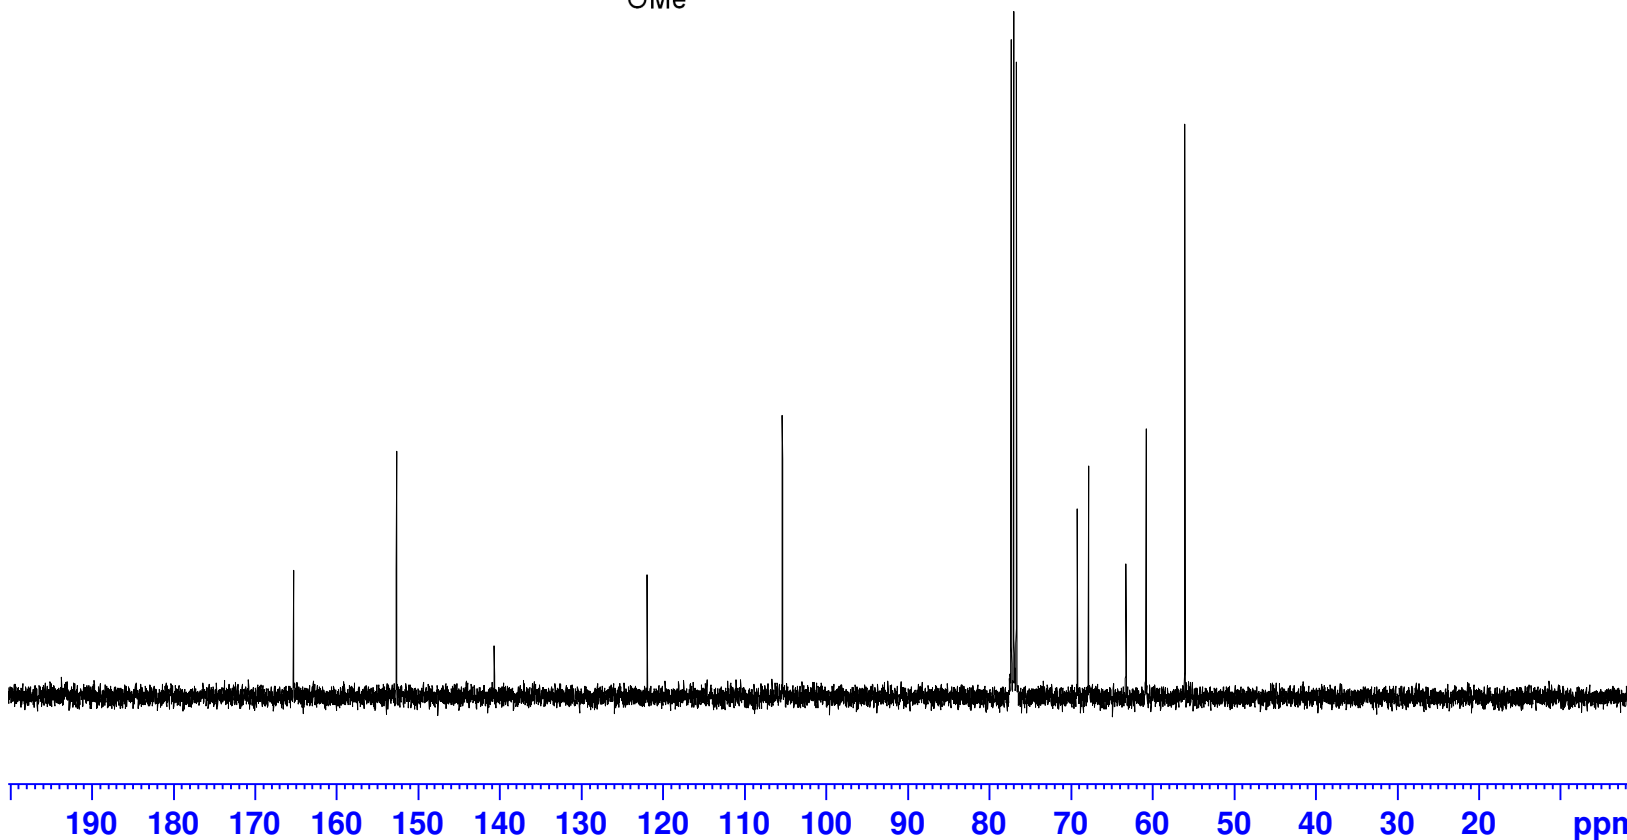

Current Data Parameters  
NAME YW-1735C-carbon  
EXPNO 3  
PROCNO 1

F2 - Acquisition Parameters  
Date\_ 20160415  
Time 14.48  
INSTRUM spect  
PROBHD 5 mm PABBO BB/  
PULPROG zgpg30  
TD 65536  
SOLVENT CDC13  
NS 37  
DS 0  
SWH 24038.461 Hz  
FIDRES 0.366798 Hz  
AQ 1.3631488 sec  
RG 196.92  
DW 20.800 usec  
DE 6.50 usec  
TE 297.6 K  
D1 2.0000000 sec  
D11 0.0300000 sec  
TD0 1

==== CHANNEL f1 =====  
SFO1 100.6228298 MHz  
NUC1 13C  
P1 9.70 usec  
PLW1 46.98899841 W

==== CHANNEL f2 =====  
SFO2 400.1316005 MHz  
NUC2 1H  
CPDPRG[2] waltz16  
PCPD2 90.00 usec  
PLW2 11.99499989 W  
PLW12 0.34213999 W  
PLW13 0.27713001 W

F2 - Processing parameters  
SI 32768  
SF 100.6127758 MHz  
WDW EM  
SSB 0  
LB 1.00 Hz  
GB 0  
PC 1.40



7.392  
7.386  
7.381  
7.371  
7.365  
7.350  
7.260  
6.972  
6.964  
6.943  
6.923  
6.918  
4.512  
4.487  
4.474  
4.467  
4.463  
4.453  
4.448  
4.438  
4.428  
4.362  
4.358  
4.340  
4.336  
4.329  
4.325  
4.318  
4.313  
3.883  
3.880  
3.874  
3.854  
3.849  
3.845  
3.677  
3.673  
3.667  
3.648  
3.642  
3.638  
2.947

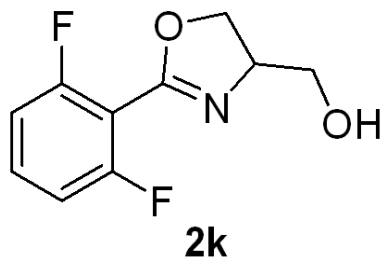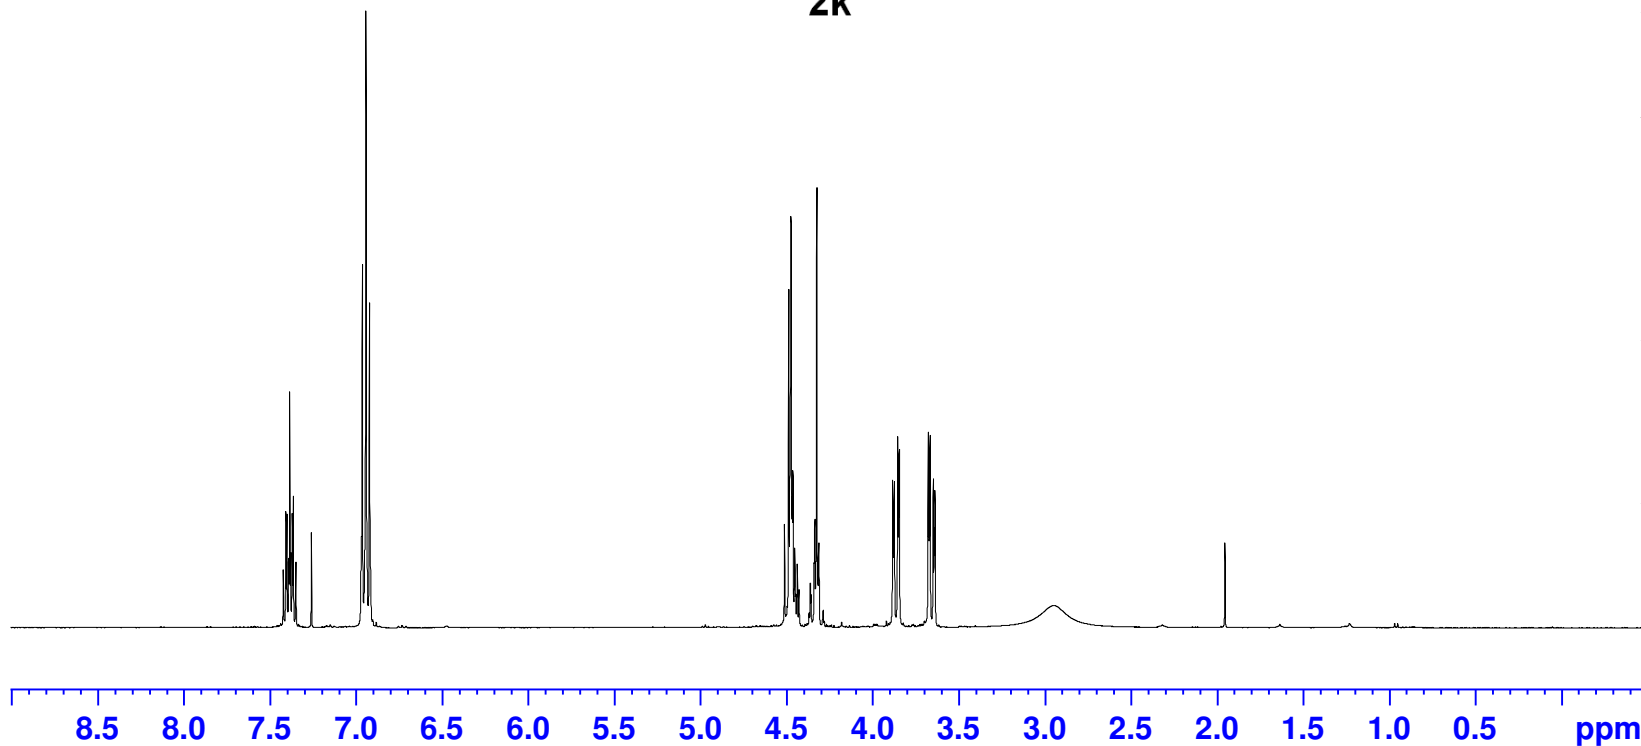

Current Data Parameters  
NAME YW-1738  
EXPNO 3  
PROCNO 1

F2 - Acquisition Parameters  
Date\_ 20160419  
Time 14.39  
INSTRUM spect  
PROBHD 5 mm PABBO BB/  
PULPROG zg30  
TD 65536  
SOLVENT CDC13  
NS 4  
DS 0  
SWH 8012.820 Hz  
FIDRES 0.122266 Hz  
AQ 4.0894465 sec  
RG 62.93  
DW 62.400 usec  
DE 6.50 usec  
TE 296.5 K  
D1 1.00000000 sec  
TD0 1

==== CHANNEL f1 =====  
SFO1 400.1324710 MHz  
NUC1 1H  
P1 14.50 usec  
PLW1 11.99499989 W

F2 - Processing parameters  
SI 65536  
SF 400.1300094 MHz  
WDW EM  
SSB 0  
LB 0.30 Hz  
GB 0  
PC 1.00



162.270  
162.211  
159.724  
159.664  
158.138

132.548  
132.444  
132.341  
111.999  
111.972  
111.948  
111.794  
111.772  
111.746  
107.059  
106.885  
106.711

77.318  
77.000  
76.681  
69.527  
68.199  
63.708

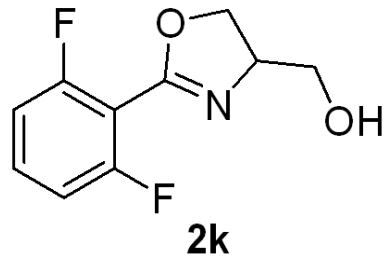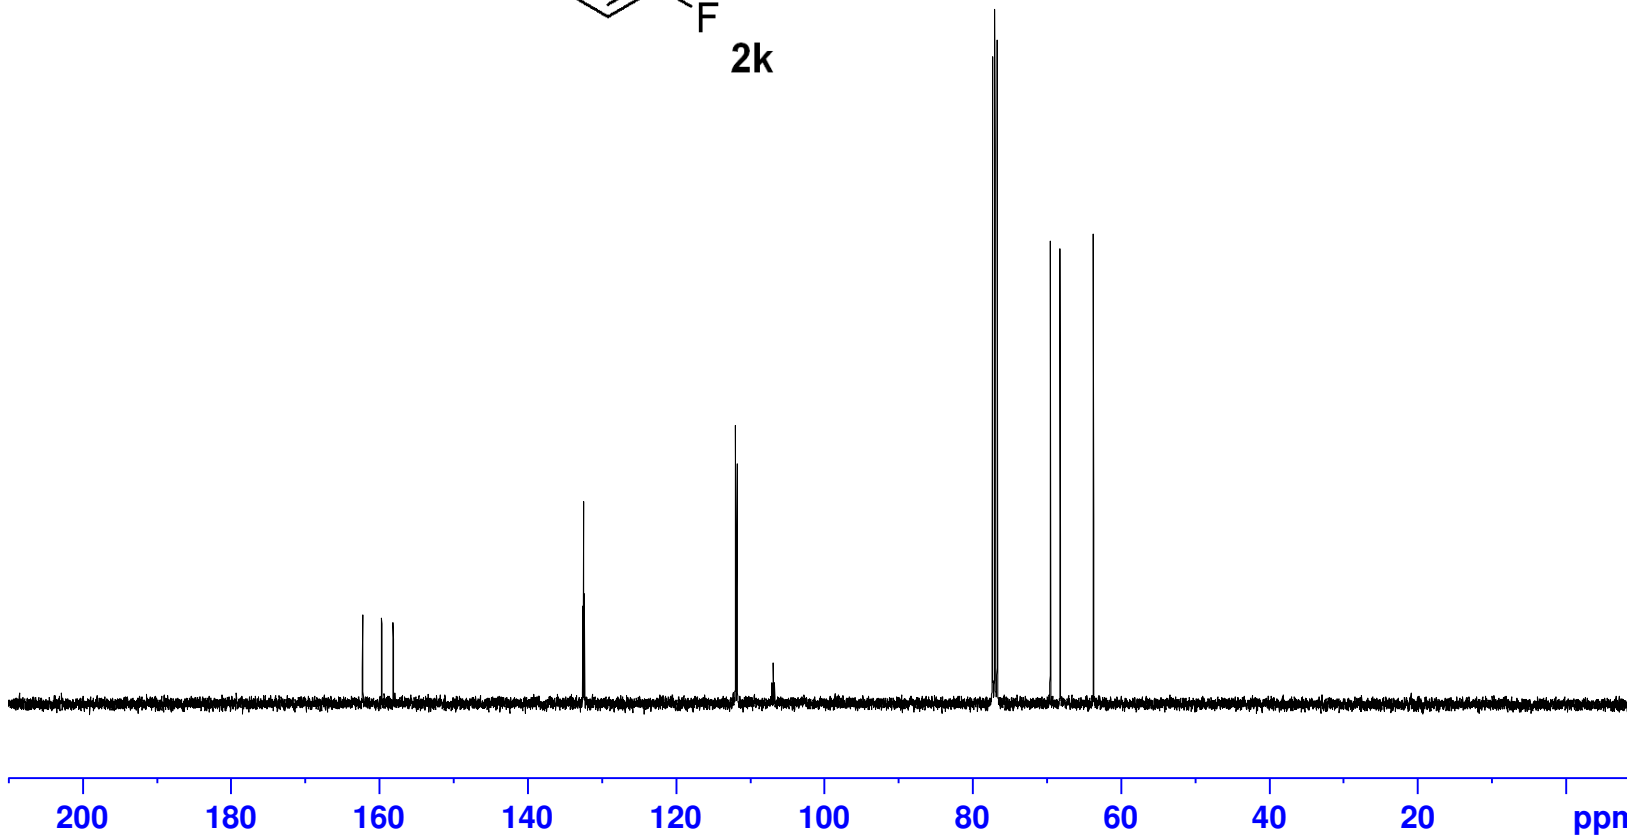

Current Data Parameters  
NAME YW-1738-carbon  
EXPNO 3  
PROCNO 1

F2 - Acquisition Parameters  
Date\_ 20160419  
Time 14.48  
INSTRUM spect  
PROBHD 5 mm PABBO BB/  
PULPROG zgpg30  
TD 65536  
SOLVENT CDC13  
NS 144  
DS 0  
SWH 24038.461 Hz  
FIDRES 0.366798 Hz  
AQ 1.3631488 sec  
RG 196.92  
DW 20.800 usec  
DE 6.50 usec  
TE 297.7 K  
D1 2.00000000 sec  
D11 0.03000000 sec  
TD0 1

==== CHANNEL f1 =====  
SFO1 100.6228298 MHz  
NUC1 13C  
P1 9.70 usec  
PLW1 46.98899841 W

==== CHANNEL f2 =====  
SFO2 400.1316005 MHz  
NUC2 1H  
CPDPRG[2] waltz16  
PCPD2 90.00 usec  
PLW2 11.99499989 W  
PLW12 0.34213999 W  
PLW13 0.27713001 W

F2 - Processing parameters  
SI 32768  
SF 100.6127758 MHz  
WDW EM  
SSB 0  
LB 1.00 Hz  
GB 0  
PC 1.40





Current Data Parameters  
NAME YW-1738-19F  
EXPNO 3  
PROCNO 1

F2 - Acquisition Parameters  
Date\_ 20160419  
Time 14.52  
INSTRUM spect  
PROBHD 5 mm PABBO BB/  
PULPROG zgflqn  
TD 131072  
SOLVENT CDC13  
NS 11  
DS 0  
SWH 89285.711 Hz  
FIDRES 0.681196 Hz  
AQ 0.7340032 sec  
RG 196.92  
DW 5.600 usec  
DE 6.50 usec  
TE 296.7 K  
D1 1.00000000 sec  
TD0 1

==== CHANNEL f1 =====  
SFO1 376.4607164 MHz  
NUC1 19F  
P1 14.70 usec  
PLW1 15.99600029 W

F2 - Processing parameters  
SI 65536  
SF 376.4983660 MHz  
WDW EM  
SSB 0  
LB 0.30 Hz  
GB 0  
PC 1.00

↙  
-108.92  
-108.94  
↘

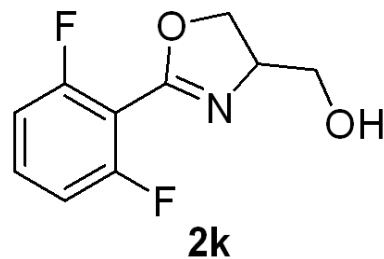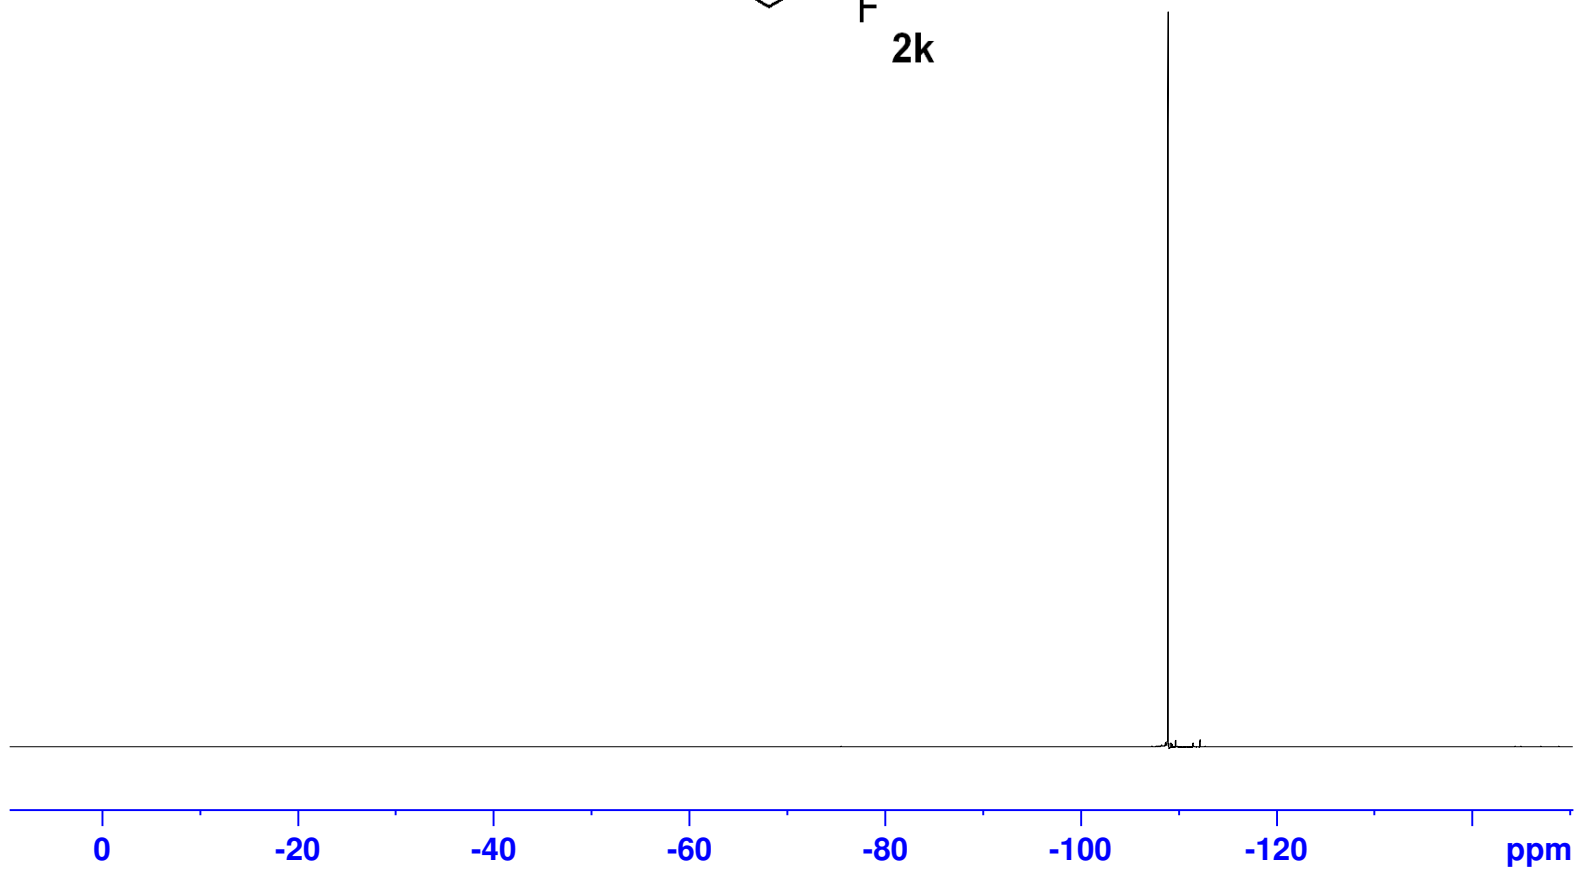



8.160  
7.882  
7.880  
7.861  
7.858  
7.800  
7.780  
7.715  
7.693  
7.672  
7.538  
7.521  
7.502  
7.461  
7.442  
7.424  
7.260  
4.531  
4.523  
4.494  
4.480  
4.471  
4.458  
4.447  
4.429  
4.080  
4.075  
4.050  
3.869  
3.736  
3.729  
3.706  
3.699

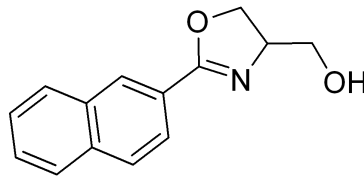

2I

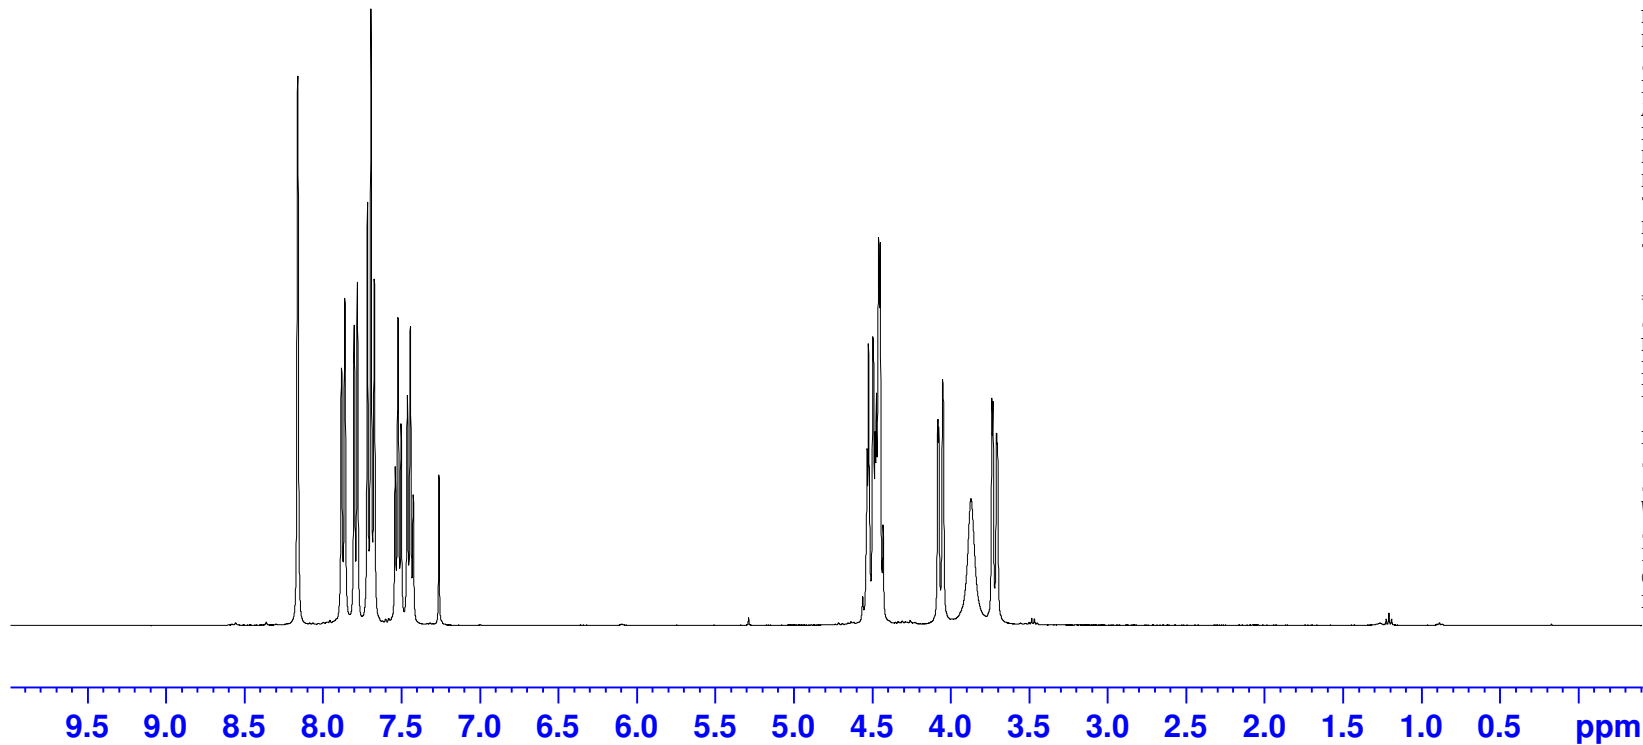

1.00  
1.05  
1.03  
2.02  
1.03  
1.02

3.07  
1.03  
1.09  
1.07

Current Data Parameters  
NAME YW-1728  
EXPNO 3  
PROCNO 1

F2 - Acquisition Parameters  
Date\_ 20160414  
Time 20.12  
INSTRUM spect  
PROBHD 5 mm PABBO BB/  
PULPROG zg30  
TD 65536  
SOLVENT CDC13  
NS 16  
DS 0  
SWH 8012.820 Hz  
FIDRES 0.122266 Hz  
AQ 4.0894465 sec  
RG 82.92  
DW 62.400 usec  
DE 6.50 usec  
TE 296.5 K  
D1 1.00000000 sec  
TD0 1

==== CHANNEL f1 =====  
SFO1 400.1324710 MHz  
NUC1 1H  
P1 14.50 usec  
PLW1 11.99499989 W

F2 - Processing parameters  
SI 65536  
SF 400.1300094 MHz  
WDW EM  
SSB 0  
LB 0.30 Hz  
GB 0  
PC 1.00

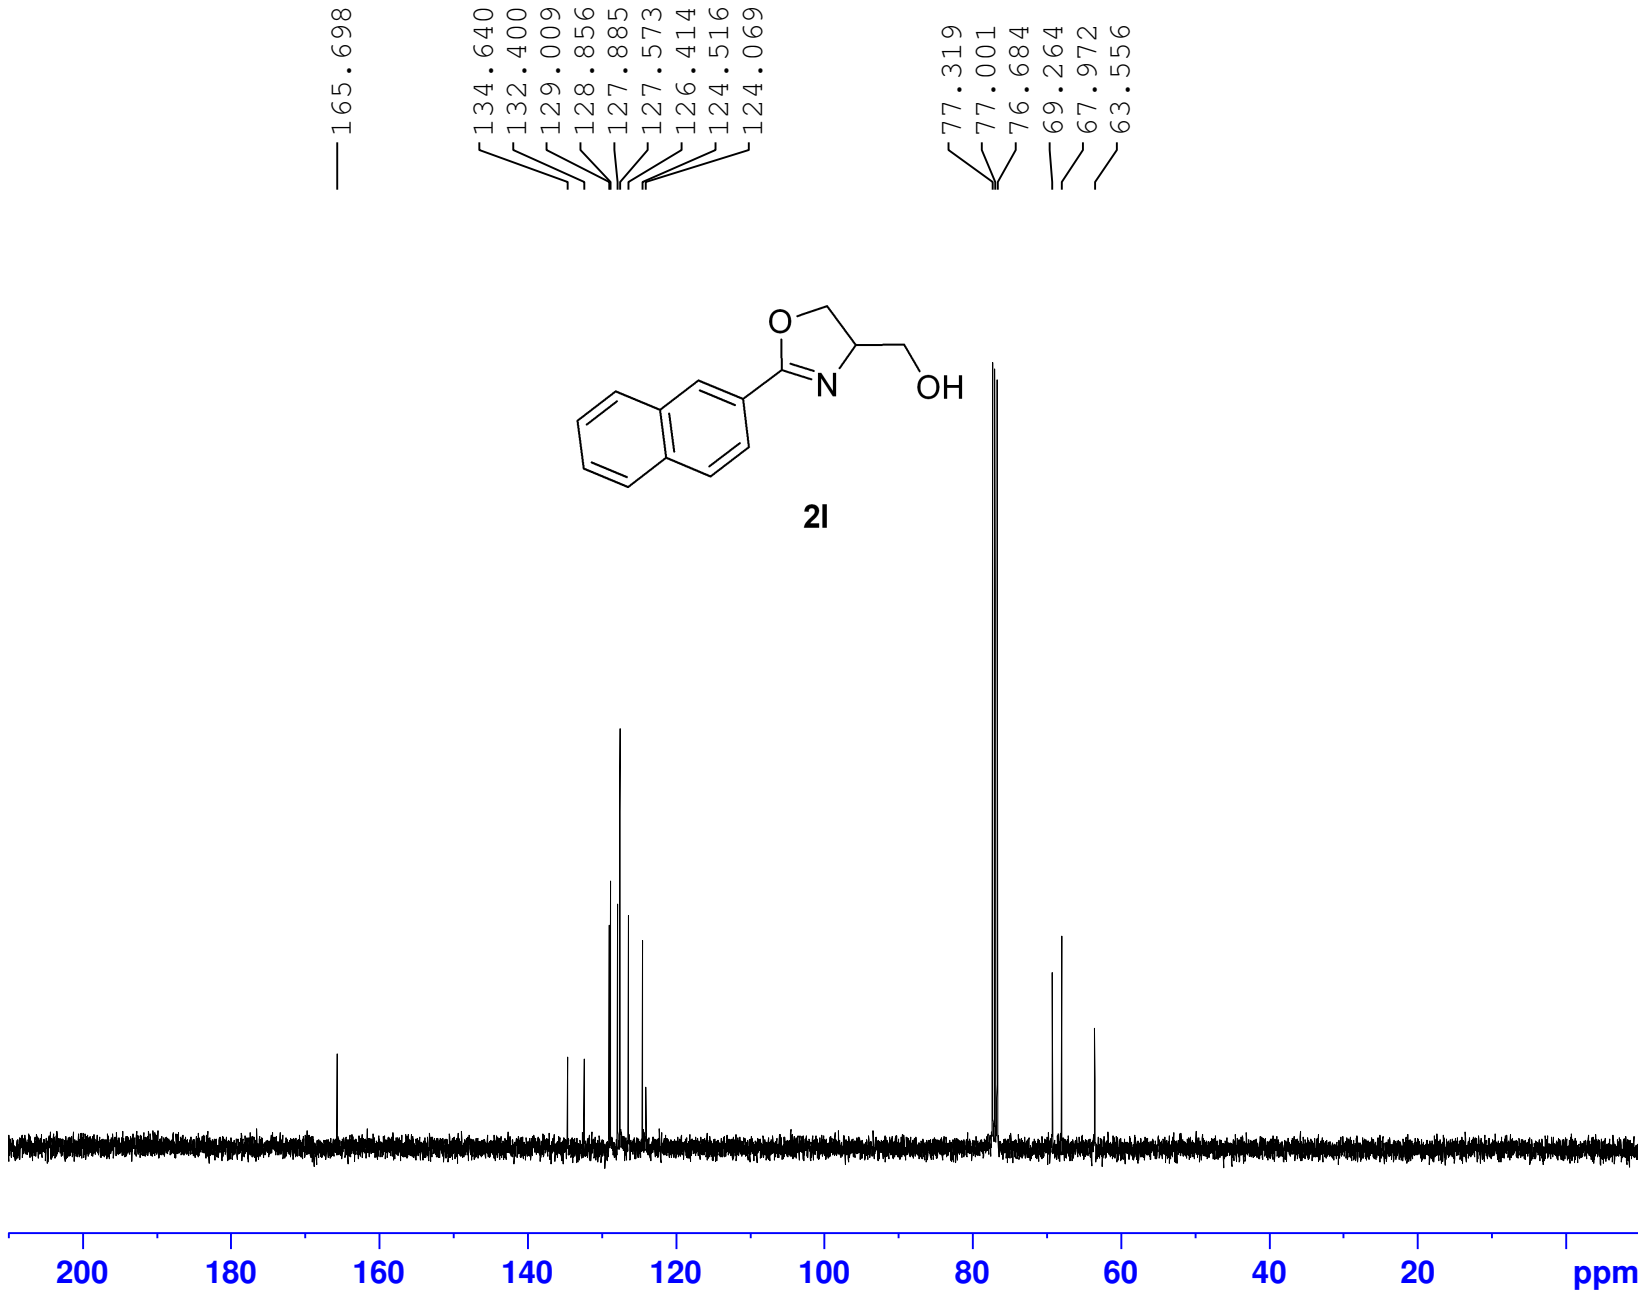

— 165.698

134.640  
132.400  
129.009  
128.856  
127.885  
127.573  
126.414  
124.516  
124.069

77.319  
77.001  
76.684  
69.264  
67.972  
63.556

Current Data Parameters  
NAME YW-1728-carbon  
EXPNO 3  
PROCNO 1

F2 - Acquisition Parameters  
Date\_ 20160414  
Time 20.16  
INSTRUM spect  
PROBHD 5 mm PABBO BB/  
PULPROG zgpg30  
TD 65536  
SOLVENT CDCl3  
NS 36  
DS 0  
SWH 24038.461 Hz  
FIDRES 0.366798 Hz  
AQ 1.3631488 sec  
RG 196.92  
DW 20.800 usec  
DE 6.50 usec  
TE 297.3 K  
D1 2.00000000 sec  
D11 0.03000000 sec  
TD0 1

==== CHANNEL f1 =====  
SFO1 100.6228298 MHz  
NUC1 13C  
P1 9.70 usec  
PLW1 46.98899841 W

==== CHANNEL f2 =====  
SFO2 400.1316005 MHz  
NUC2 1H  
CPDPRG[2] waltz16  
PCPD2 90.00 usec  
PLW2 11.99499989 W  
PLW12 0.34213999 W  
PLW13 0.27713001 W

F2 - Processing parameters  
SI 32768  
SF 100.6127744 MHz  
WDW EM  
SSB 0  
LB 1.00 Hz  
GB 0  
PC 1.40



Current Data Parameters  
NAME YW-1782  
EXPNO 4  
PROCNO 1

F2 - Acquisition Parameters  
Date\_ 20160801  
Time 20.10  
INSTRUM spect  
PROBHD 5 mm PABBO BB/  
PULPROG zg30  
TD 65536  
SOLVENT CDC13  
NS 3  
DS 0  
SWH 8012.820 Hz  
FIDRES 0.122266 Hz  
AQ 4.0894465 sec  
RG 126.97  
DW 62.400 usec  
DE 6.50 usec  
TE 299.0 K  
D1 1.00000000 sec  
TD0 1

==== CHANNEL f1 =====  
SFO1 400.1324710 MHz  
NUC1 1H  
P1 14.50 usec  
PLW1 11.99499989 W

F2 - Processing parameters  
SI 65536  
SF 400.1300094 MHz  
WDW EM  
SSB 0  
LB 0.30 Hz  
GB 0  
PC 1.00

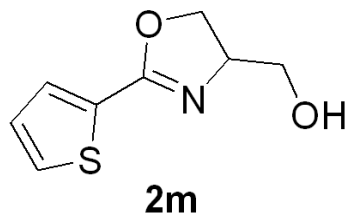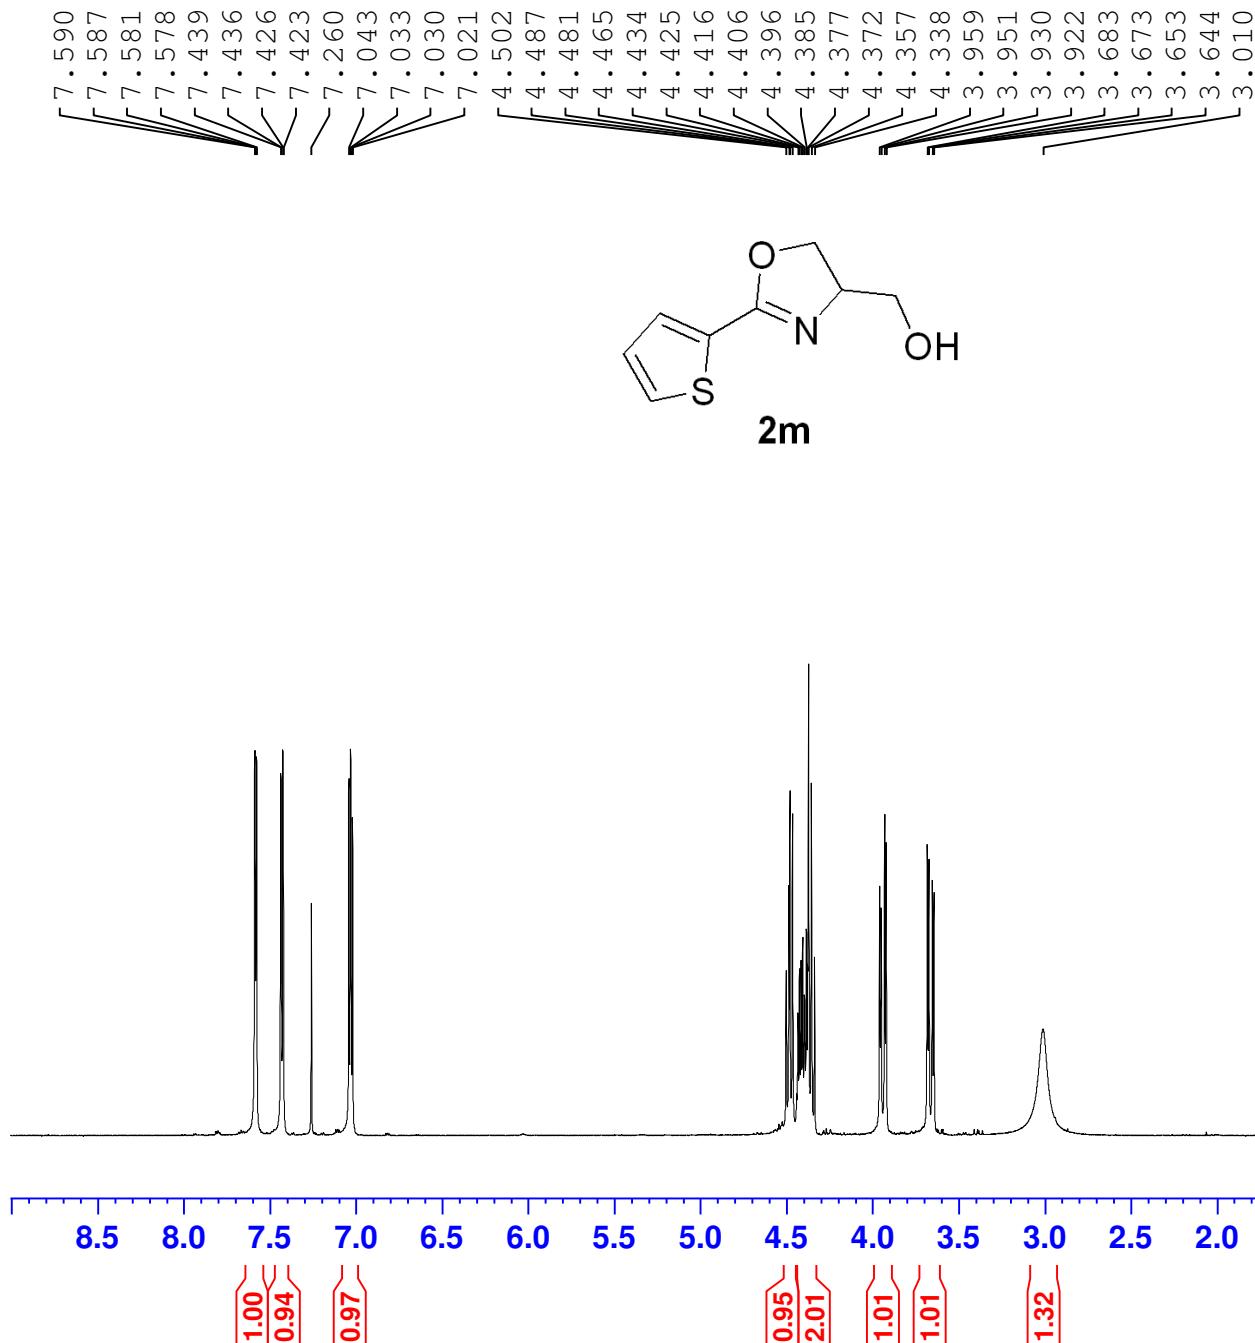



— 161.140

130.802  
130.146  
129.554  
127.545

77.320  
77.001  
76.684  
69.673  
68.125  
63.487

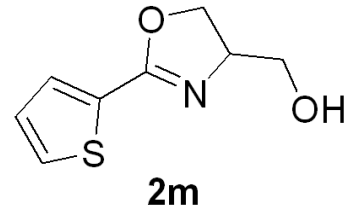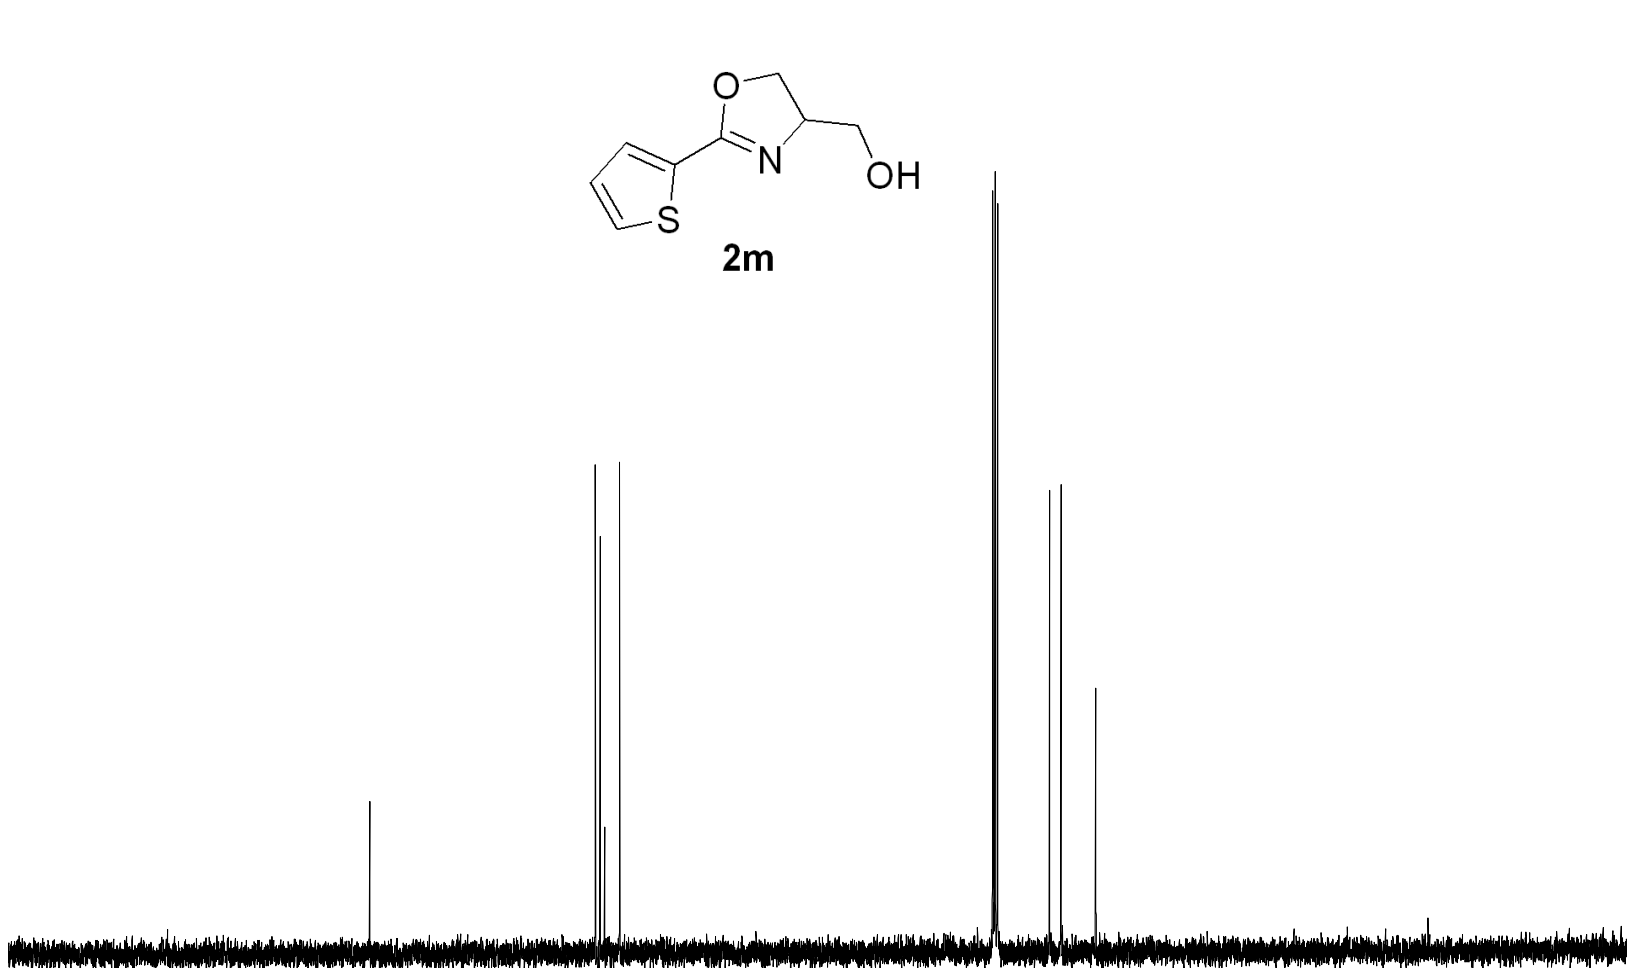

Current Data Parameters  
NAME YW-1782-carbon  
EXPNO 1  
PROCNO 1

F2 - Acquisition Parameters  
Date\_ 20160730  
Time 20.52  
INSTRUM spect  
PROBHD 5 mm PABBO BB/  
PULPROG zgpg30  
TD 65536  
SOLVENT CDC13  
NS 48  
DS 0  
SWH 24038.461 Hz  
FIDRES 0.366798 Hz  
AQ 1.3631488 sec  
RG 196.92  
DW 20.800 usec  
DE 6.50 usec  
TE 300.7 K  
D1 2.00000000 sec  
D11 0.03000000 sec  
TD0 1

==== CHANNEL f1 =====  
SFO1 100.6228298 MHz  
NUC1 13C  
P1 9.70 usec  
PLW1 46.98899841 W

==== CHANNEL f2 =====  
SFO2 400.1316005 MHz  
NUC2 1H  
CPDPRG[2] waltz16  
PCPD2 90.00 usec  
PLW2 11.99499989 W  
PLW12 0.34213999 W  
PLW13 0.27713001 W

F2 - Processing parameters  
SI 32768  
SF 100.6127751 MHz  
WDW EM  
SSB 0  
LB 1.00 Hz  
GB 0  
PC 1.40

— 7.260

4.285  
4.266  
4.261  
4.242  
4.192  
4.181  
4.174  
4.170  
4.162  
4.157  
4.150  
4.138  
4.127  
4.068  
4.049  
4.029  
3.708  
3.697  
3.680  
3.669  
3.558  
3.546  
3.530  
3.518  
3.381

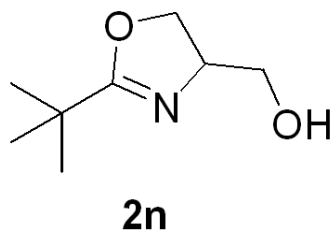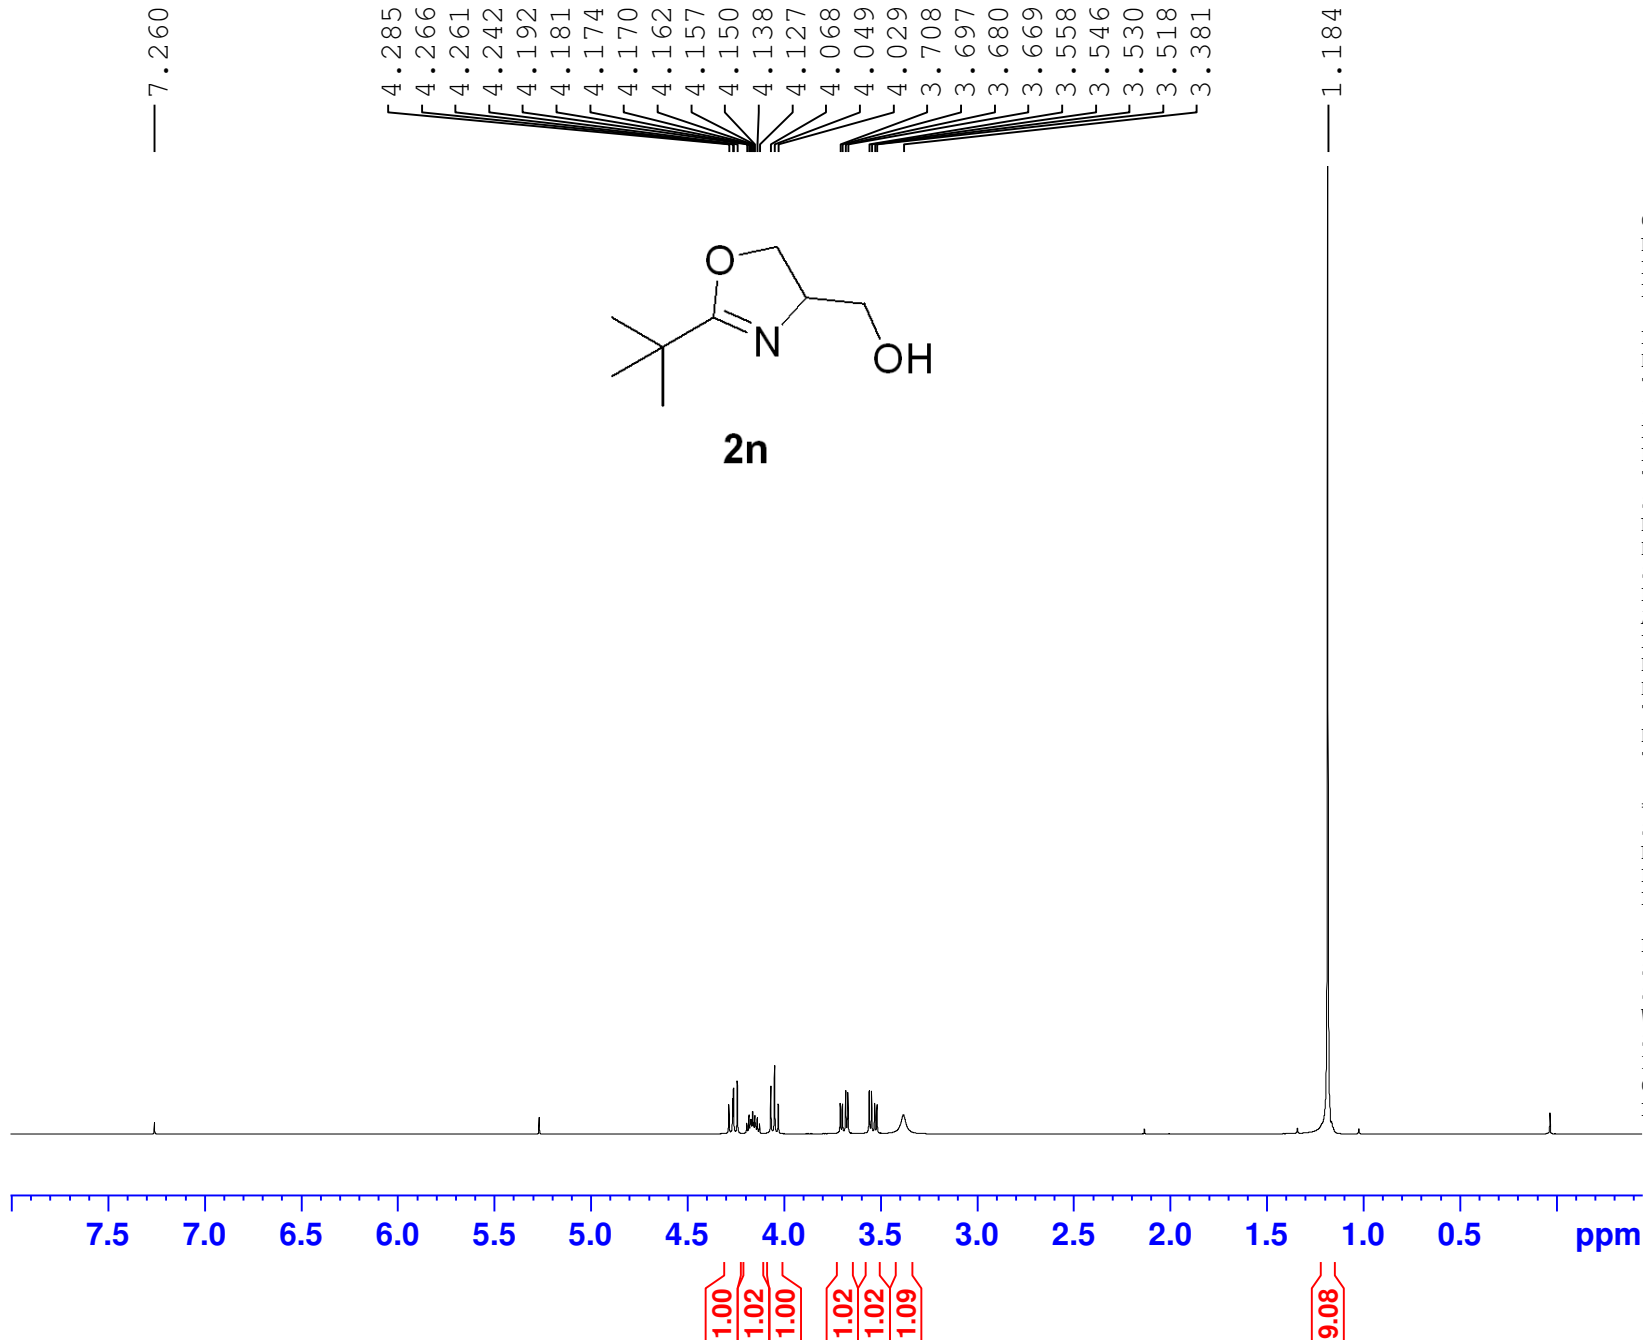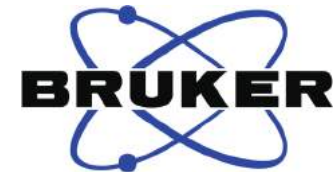

Current Data Parameters  
NAME YW-1783  
EXPNO 1  
PROCNO 1

F2 - Acquisition Parameters  
Date\_ 20160802  
Time 15.54  
INSTRUM spect  
PROBHD 5 mm PABBO BB/  
PULPROG zg30  
TD 65536  
SOLVENT CDC13  
NS 10  
DS 0  
SWH 8012.820 Hz  
FIDRES 0.122266 Hz  
AQ 4.0894465 sec  
RG 34.77  
DW 62.400 usec  
DE 6.50 usec  
TE 298.8 K  
D1 1.00000000 sec  
TD0 1

==== CHANNEL f1 =====  
SFO1 400.1324710 MHz  
NUC1 1H  
P1 14.50 usec  
PLW1 11.99499989 W

F2 - Processing parameters  
SI 65536  
SF 400.1300094 MHz  
WDW EM  
SSB 0  
LB 0.30 Hz  
GB 0  
PC 1.00

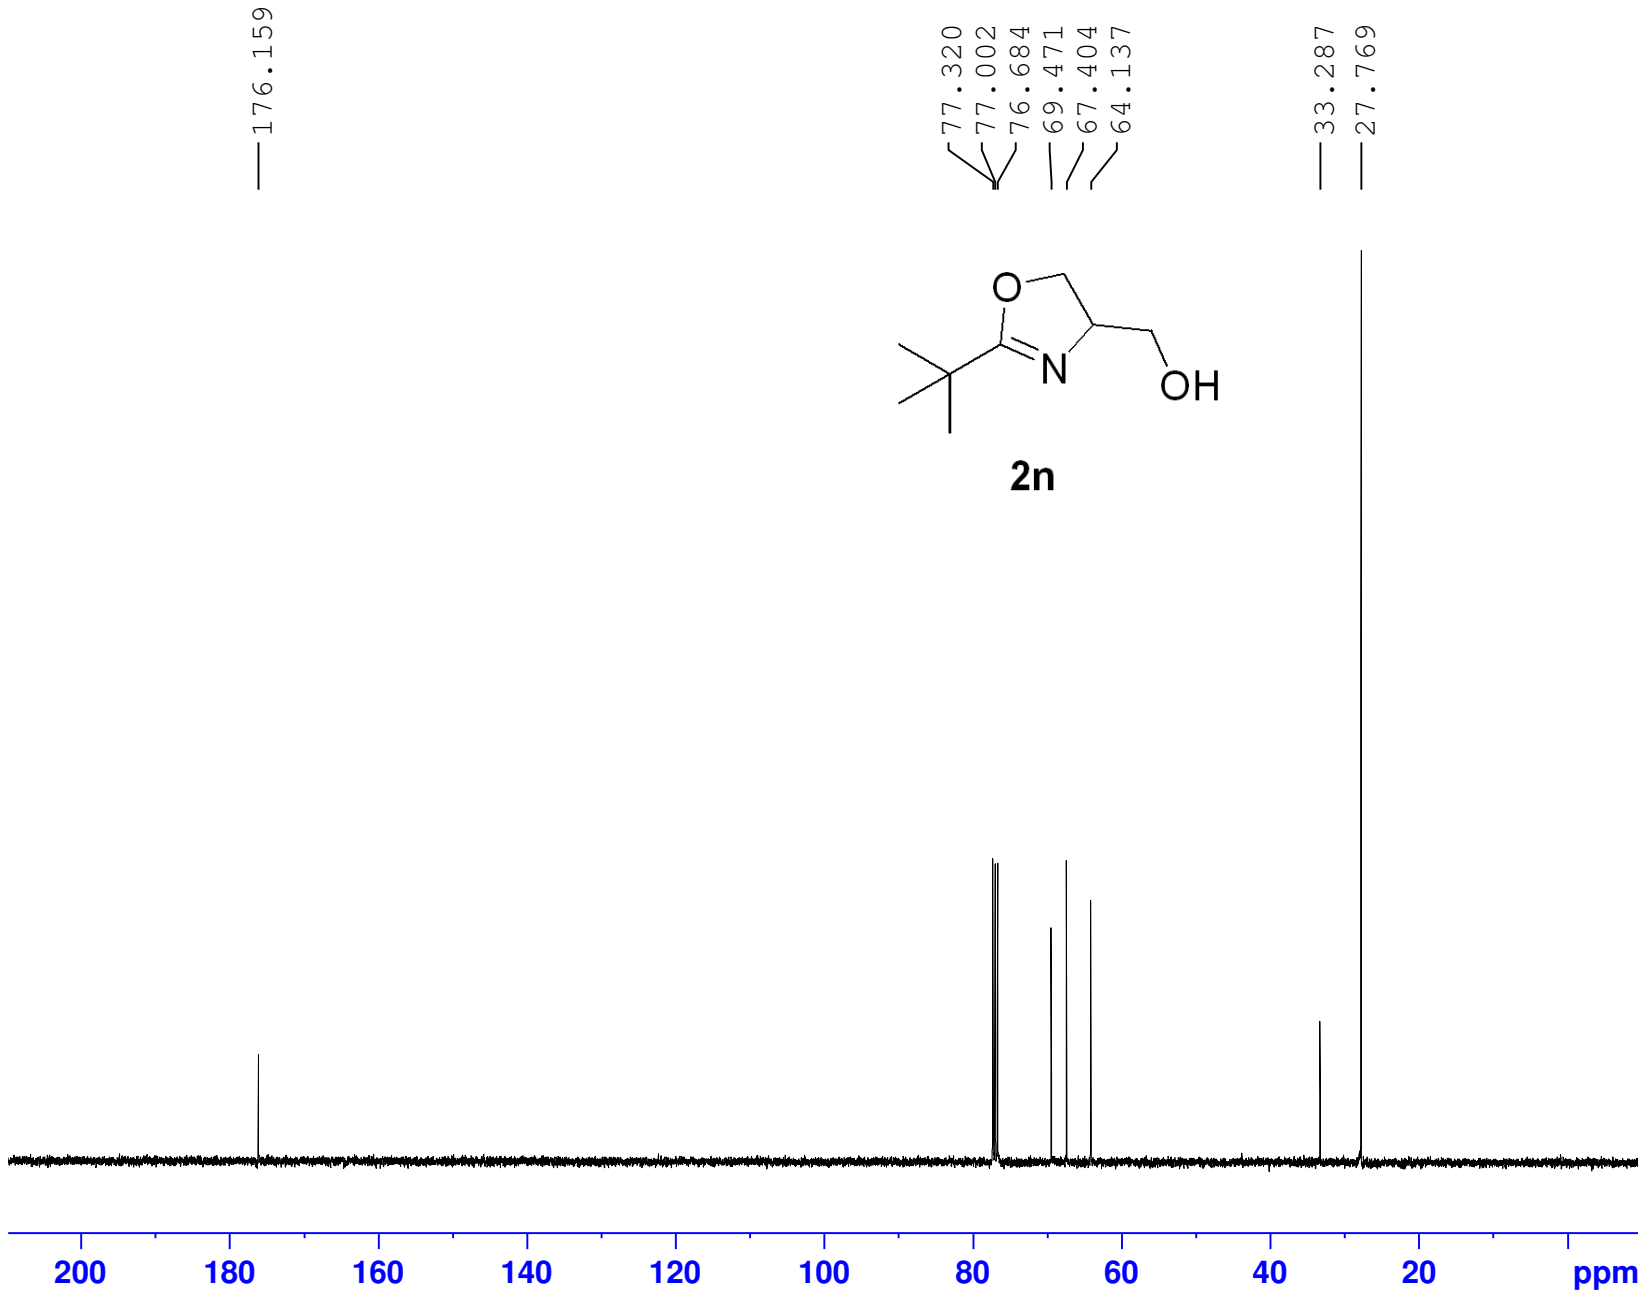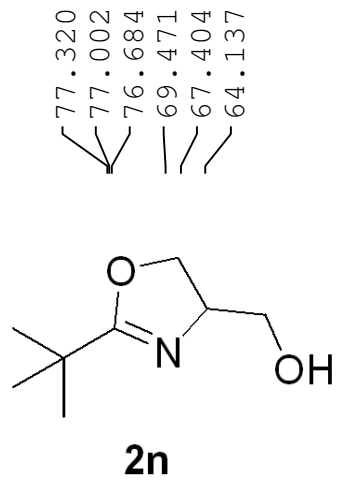

Current Data Parameters  
NAME YW-1783-carbon  
EXPNO 1  
PROCNO 1

F2 - Acquisition Parameters  
Date\_ 20160802  
Time 15.56  
INSTRUM spect  
PROBHD 5 mm PABBO BB/  
PULPROG zgpg30  
TD 65536  
SOLVENT CDC13  
NS 34  
DS 0  
SWH 24038.461 Hz  
FIDRES 0.366798 Hz  
AQ 1.3631488 sec  
RG 196.92  
DW 20.800 usec  
DE 6.50 usec  
TE 299.6 K  
D1 2.00000000 sec  
D11 0.03000000 sec  
TD0 1

==== CHANNEL f1 =====  
SFO1 100.6228298 MHz  
NUC1 13C  
P1 9.70 usec  
PLW1 46.98899841 W

==== CHANNEL f2 =====  
SFO2 400.1316005 MHz  
NUC2 1H  
CPDPRG[2] waltz16  
PCPD2 90.00 usec  
PLW2 11.99499989 W  
PLW12 0.34213999 W  
PLW13 0.27713001 W

F2 - Processing parameters  
SI 32768  
SF 100.6127737 MHz  
WDW EM  
SSB 0  
LB 1.00 Hz  
GB 0  
PC 1.40



7.351  
7.342  
7.336  
7.306  
7.298  
7.290  
7.265  
7.260  
7.224  
6.557  
6.517

4.474  
4.426  
4.398  
4.392  
4.363  
4.352  
4.344  
4.334  
4.315  
4.307  
4.288  
3.931  
3.906  
3.708  
3.641  
3.636  
3.612

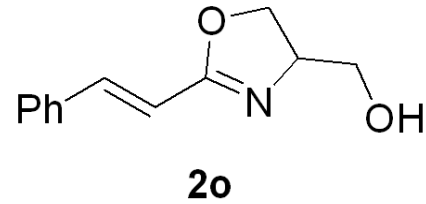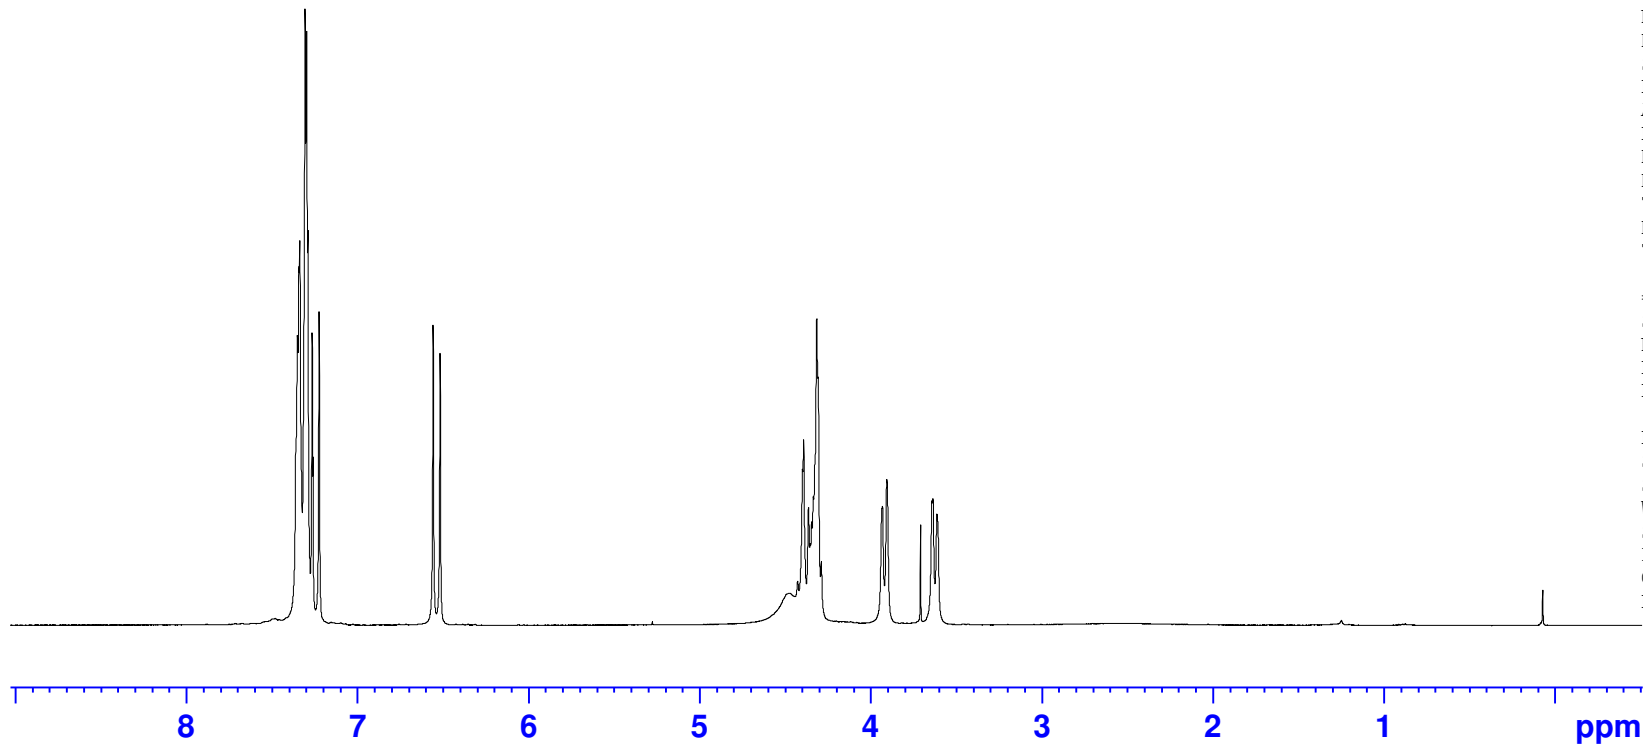

Current Data Parameters  
NAME YW-1907B  
EXPNO 1  
PROCNO 1

F2 - Acquisition Parameters  
Date\_ 20160811  
Time 10.52  
INSTRUM spect  
PROBHD 5 mm PABBO BB/  
PULPROG zg30  
TD 65536  
SOLVENT CDC13  
NS 3  
DS 0  
SWH 8012.820 Hz  
FIDRES 0.122266 Hz  
AQ 4.0894465 sec  
RG 49.32  
DW 62.400 usec  
DE 6.50 usec  
TE 299.3 K  
D1 1.00000000 sec  
TD0 1

==== CHANNEL f1 =====  
SFO1 400.1324710 MHz  
NUC1 1H  
P1 14.50 usec  
PLW1 11.99499989 W

F2 - Processing parameters  
SI 65536  
SF 400.1300095 MHz  
WDW EM  
SSB 0  
LB 0.30 Hz  
GB 0  
PC 1.00





— 165.206  
— 140.568  
— 134.854  
— 129.459  
— 128.653  
— 127.462  
— 114.343  
77.317  
77.000  
76.681  
68.945  
67.842  
63.345

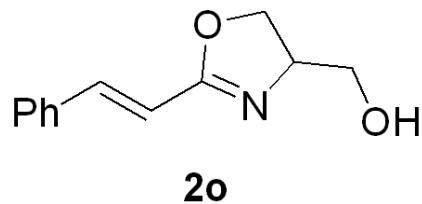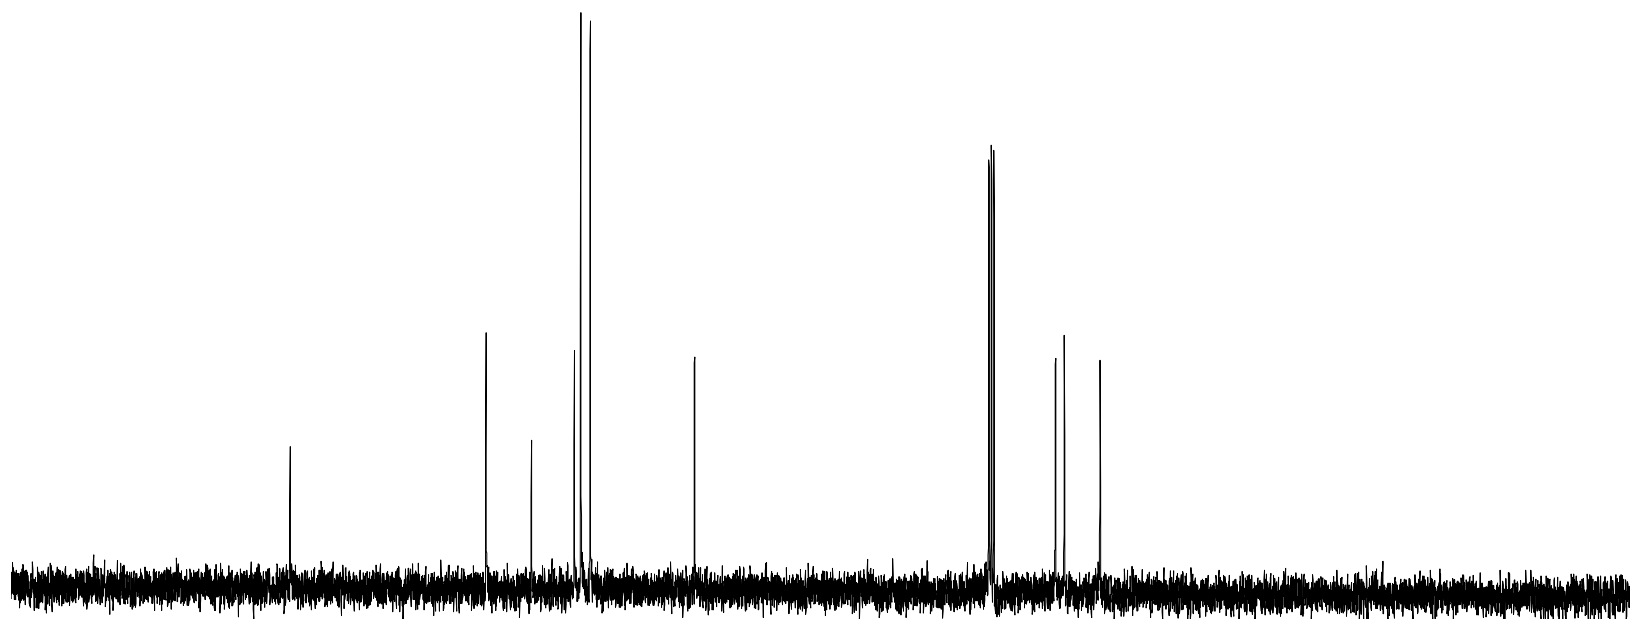

Current Data Parameters  
NAME YW-1907B-carbon  
EXPNO 1  
PROCNO 1

F2 - Acquisition Parameters  
Date\_ 20160811  
Time 13.00  
INSTRUM spect  
PROBHD 5 mm PABBO BB/  
PULPROG zgpg30  
TD 65536  
SOLVENT CDC13  
NS 31  
DS 0  
SWH 24038.461 Hz  
FIDRES 0.366798 Hz  
AQ 1.3631488 sec  
RG 196.92  
DW 20.800 usec  
DE 6.50 usec  
TE 299.5 K  
D1 2.00000000 sec  
D11 0.03000000 sec  
TD0 1

==== CHANNEL f1 =====  
SFO1 100.6228298 MHz  
NUC1 13C  
P1 9.70 usec  
PLW1 46.98899841 W

==== CHANNEL f2 =====  
SFO2 400.1316005 MHz  
NUC2 1H  
CPDPRG[2] waltz16  
PCPD2 90.00 usec  
PLW2 11.99499989 W  
PLW12 0.34213999 W  
PLW13 0.27713001 W

F2 - Processing parameters  
SI 32768  
SF 100.6127767 MHz  
WDW EM  
SSB 0  
LB 1.00 Hz  
GB 0  
PC 1.40

180 160 140 120 100 80 60 40 20 ppm



7.359  
7.355  
7.342  
7.338  
7.331  
7.324  
7.306  
7.289  
7.284  
7.260  
6.614

4.514  
4.415  
4.393  
4.371  
4.139  
4.127  
4.117  
4.105  
4.014  
4.001  
3.987  
3.979  
3.965  
3.952  
3.453  
3.449  
3.438  
3.436

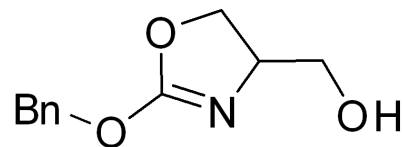

2p

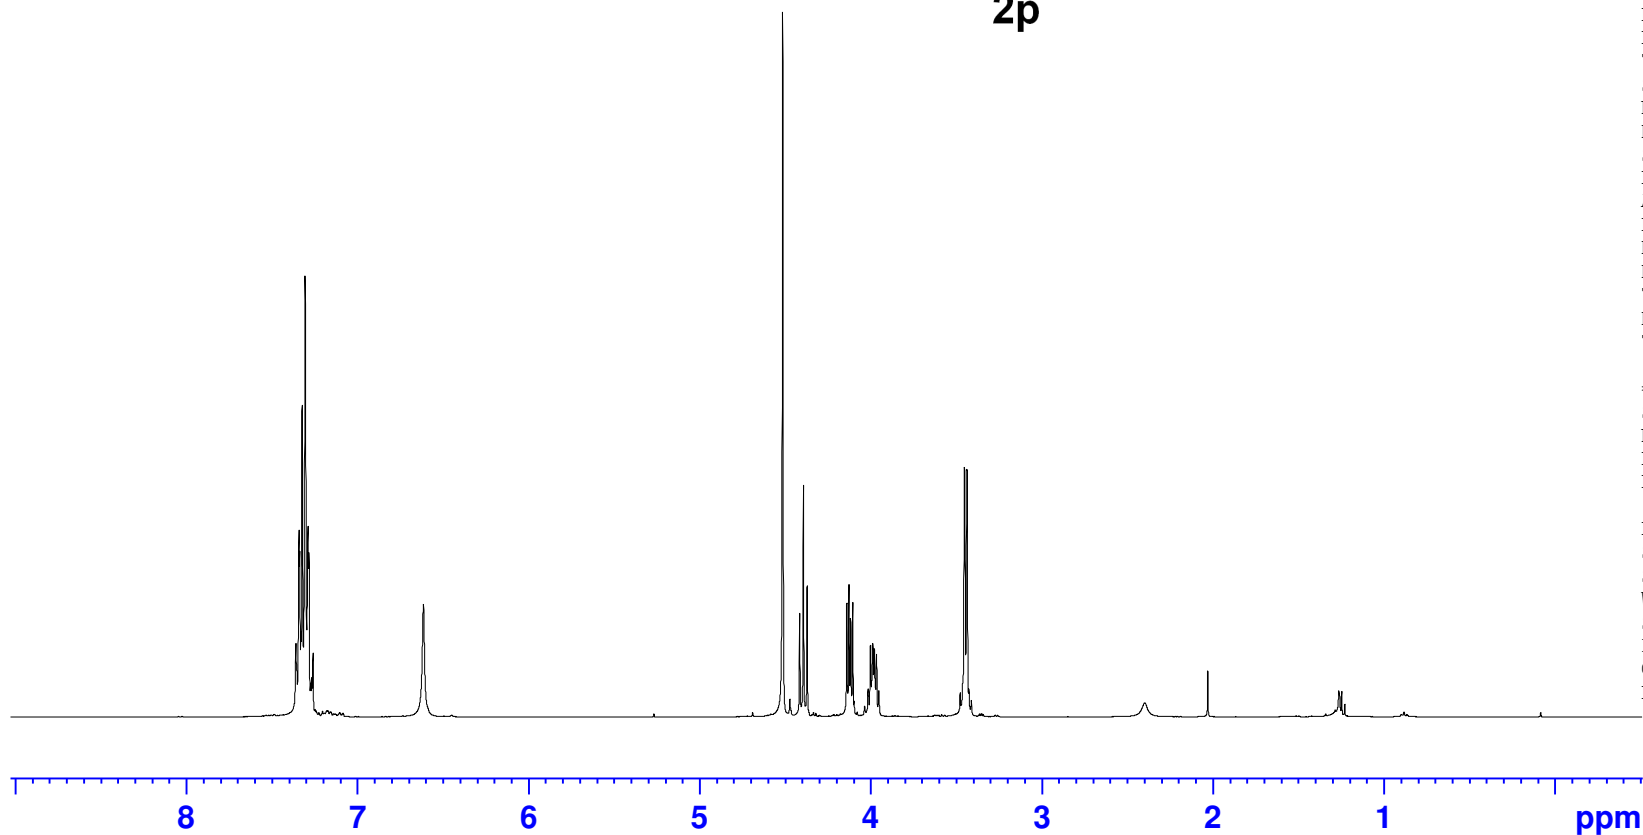

Current Data Parameters  
NAME YW-1761A  
EXPNO 1  
PROCNO 1

F2 - Acquisition Parameters  
Date\_ 20160504  
Time 18.41  
INSTRUM spect  
PROBHD 5 mm PABBO BB/  
PULPROG zg30  
TD 65536  
SOLVENT CDC13  
NS 8  
DS 0  
SWH 8012.820 Hz  
FIDRES 0.122266 Hz  
AQ 4.0894465 sec  
RG 25.32  
DW 62.400 usec  
DE 6.50 usec  
TE 296.0 K  
D1 1.00000000 sec  
TD0 1

==== CHANNEL f1 =====  
SFO1 400.1324710 MHz  
NUC1 1H  
P1 14.50 usec  
PLW1 11.99499989 W

F2 - Processing parameters  
SI 65536  
SF 400.1300091 MHz  
WDW EM  
SSB 0  
LB 0.30 Hz  
GB 0  
PC 1.00



—159.913

—137.255

128.330

127.762

127.561

77.317

76.999

76.680

73.285

71.315

67.203

—51.739

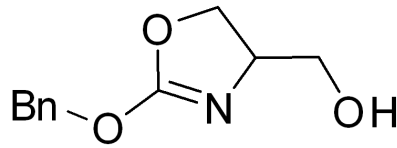

2p

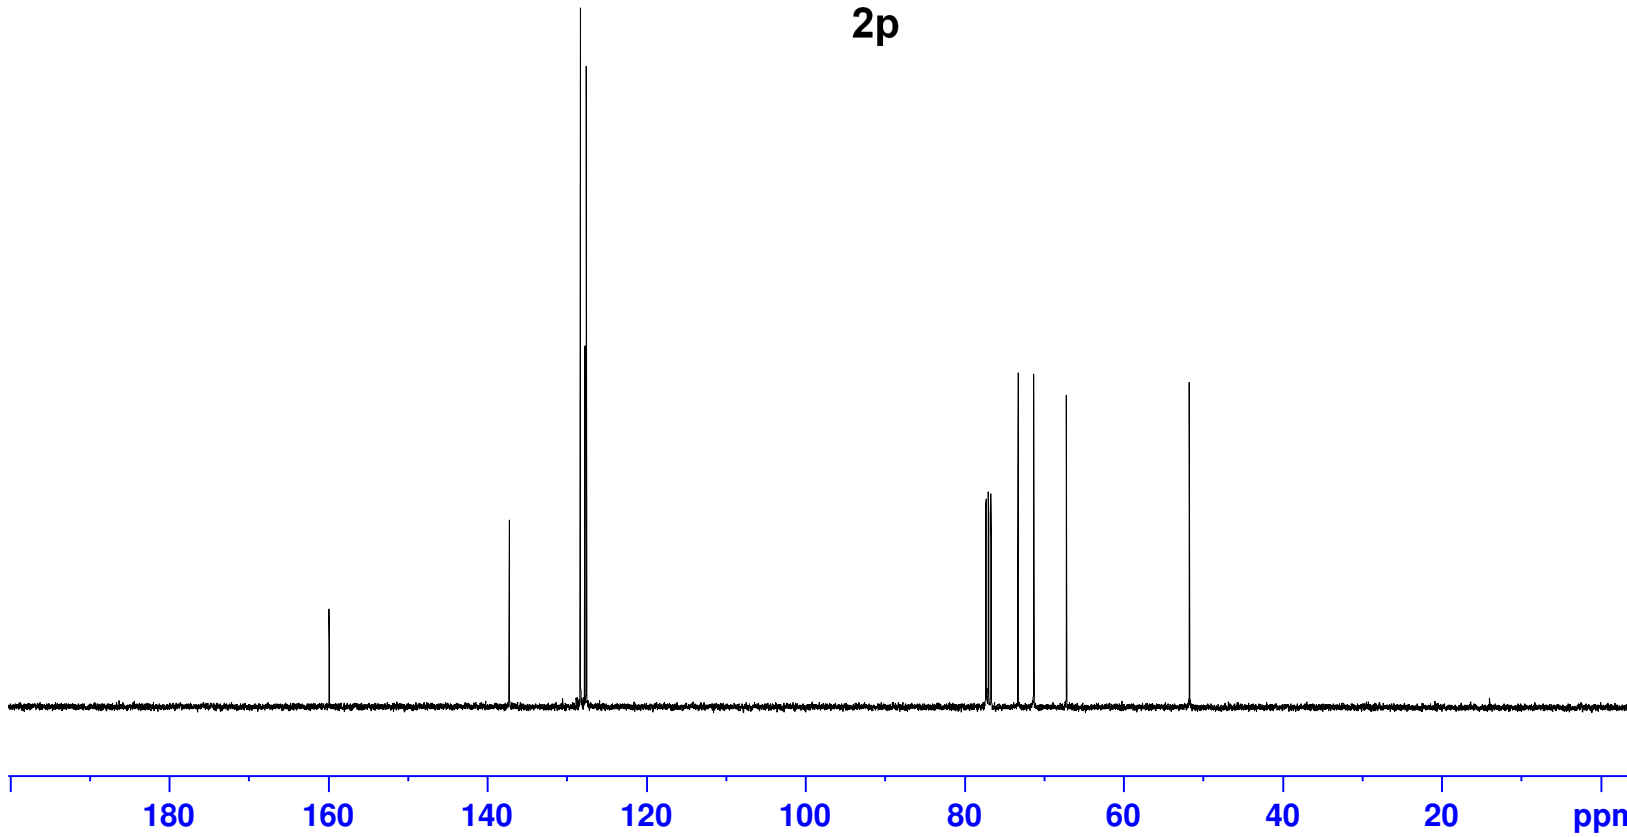

Current Data Parameters  
NAME YW-1761A-carbon  
EXPNO 1  
PROCNO 1

F2 - Acquisition Parameters  
Date\_ 20160504  
Time 18.45  
INSTRUM spect  
PROBHD 5 mm PABBO BB/  
PULPROG zgpg30  
TD 65536  
SOLVENT CDCl3  
NS 48  
DS 0  
SWH 24038.461 Hz  
FIDRES 0.366798 Hz  
AQ 1.3631488 sec  
RG 196.92  
DW 20.800 usec  
DE 6.50 usec  
TE 296.9 K  
D1 2.00000000 sec  
D11 0.03000000 sec  
TD0 1

==== CHANNEL f1 =====  
SFO1 100.6228298 MHz  
NUC1 13C  
P1 9.70 usec  
PLW1 46.98899841 W

==== CHANNEL f2 =====  
SFO2 400.1316005 MHz  
NUC2 1H  
CPDPRG[2] waltz16  
PCPD2 90.00 usec  
PLW2 11.99499989 W  
PLW12 0.34213999 W  
PLW13 0.27713001 W

F2 - Processing parameters  
SI 32768  
SF 100.6127912 MHz  
WDW EM  
SSB 0  
LB 1.00 Hz  
GB 0  
PC 1.40



7.220  
7.216  
7.202  
7.199  
7.196  
7.182  
7.178  
6.686  
6.684  
6.675  
6.672  
6.666  
6.655  
6.652  
6.649  
4.851  
4.464  
4.453  
4.444  
4.439  
4.434  
4.429  
4.424  
4.420  
4.410  
4.399  
4.347  
4.327  
4.323  
4.302  
4.199  
4.179  
4.160  
3.842  
3.832  
3.813  
3.803  
3.631  
3.620  
3.603  
3.592

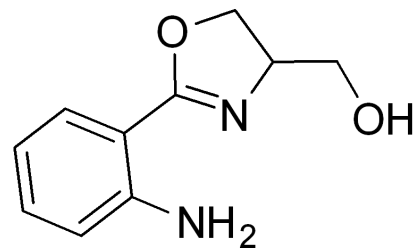

2q

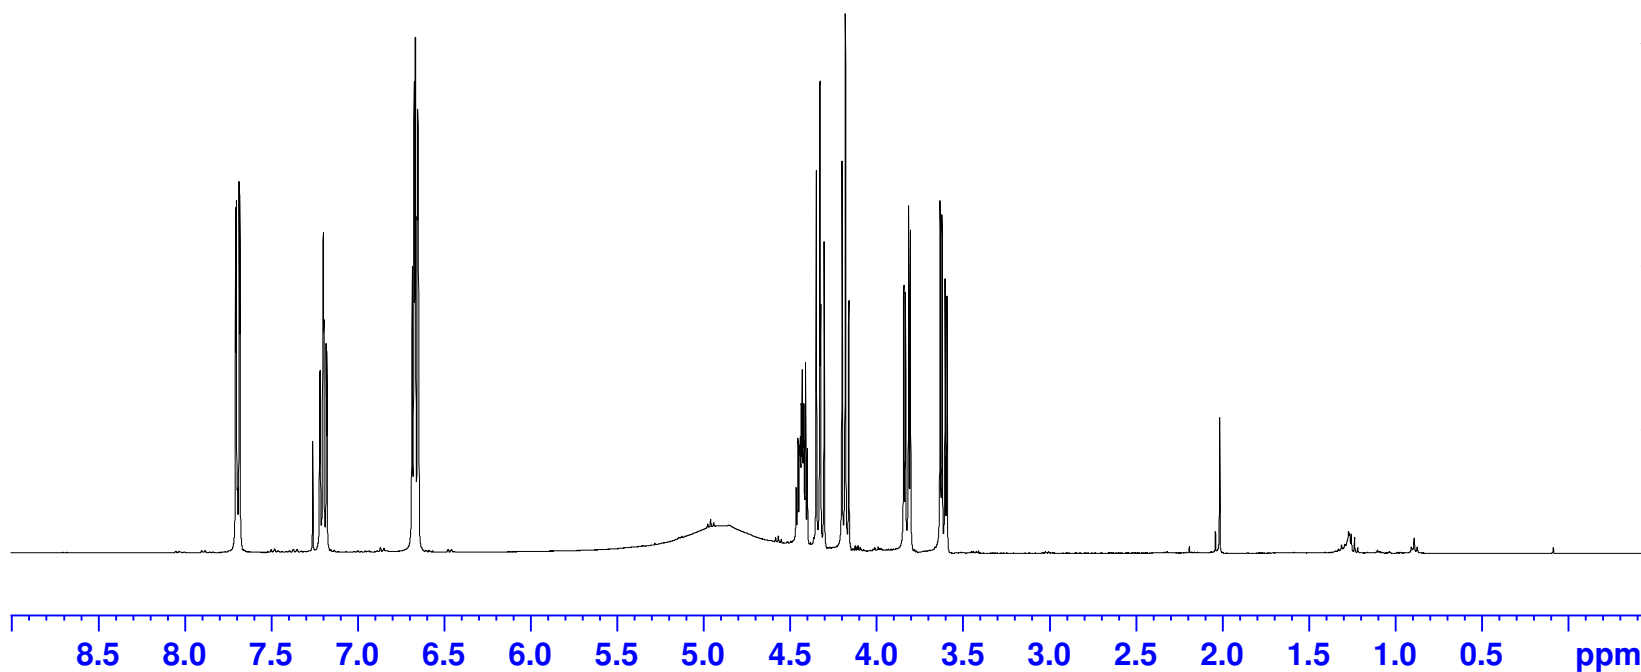

Current Data Parameters  
NAME YW-1742A  
EXPNO 4  
PROCNO 1

F2 - Acquisition Parameters  
Date\_ 20160420  
Time 20.02  
INSTRUM spect  
PROBHD 5 mm PABBO BB/  
PULPROG zg30  
TD 65536  
SOLVENT CDC13  
NS 5  
DS 0  
SWH 8012.820 Hz  
FIDRES 0.122266 Hz  
AQ 4.0894465 sec  
RG 45.67  
DW 62.400 usec  
DE 6.50 usec  
TE 297.3 K  
D1 1.00000000 sec  
TD0 1

==== CHANNEL f1 =====  
SFO1 400.1324710 MHz  
NUC1 1H  
P1 14.50 usec  
PLW1 11.99499989 W

F2 - Processing parameters  
SI 65536  
SF 400.1300093 MHz  
WDW EM  
SSB 0  
LB 0.30 Hz  
GB 0  
PC 1.00

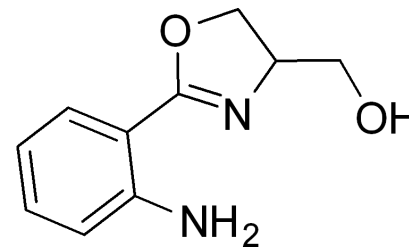

2q

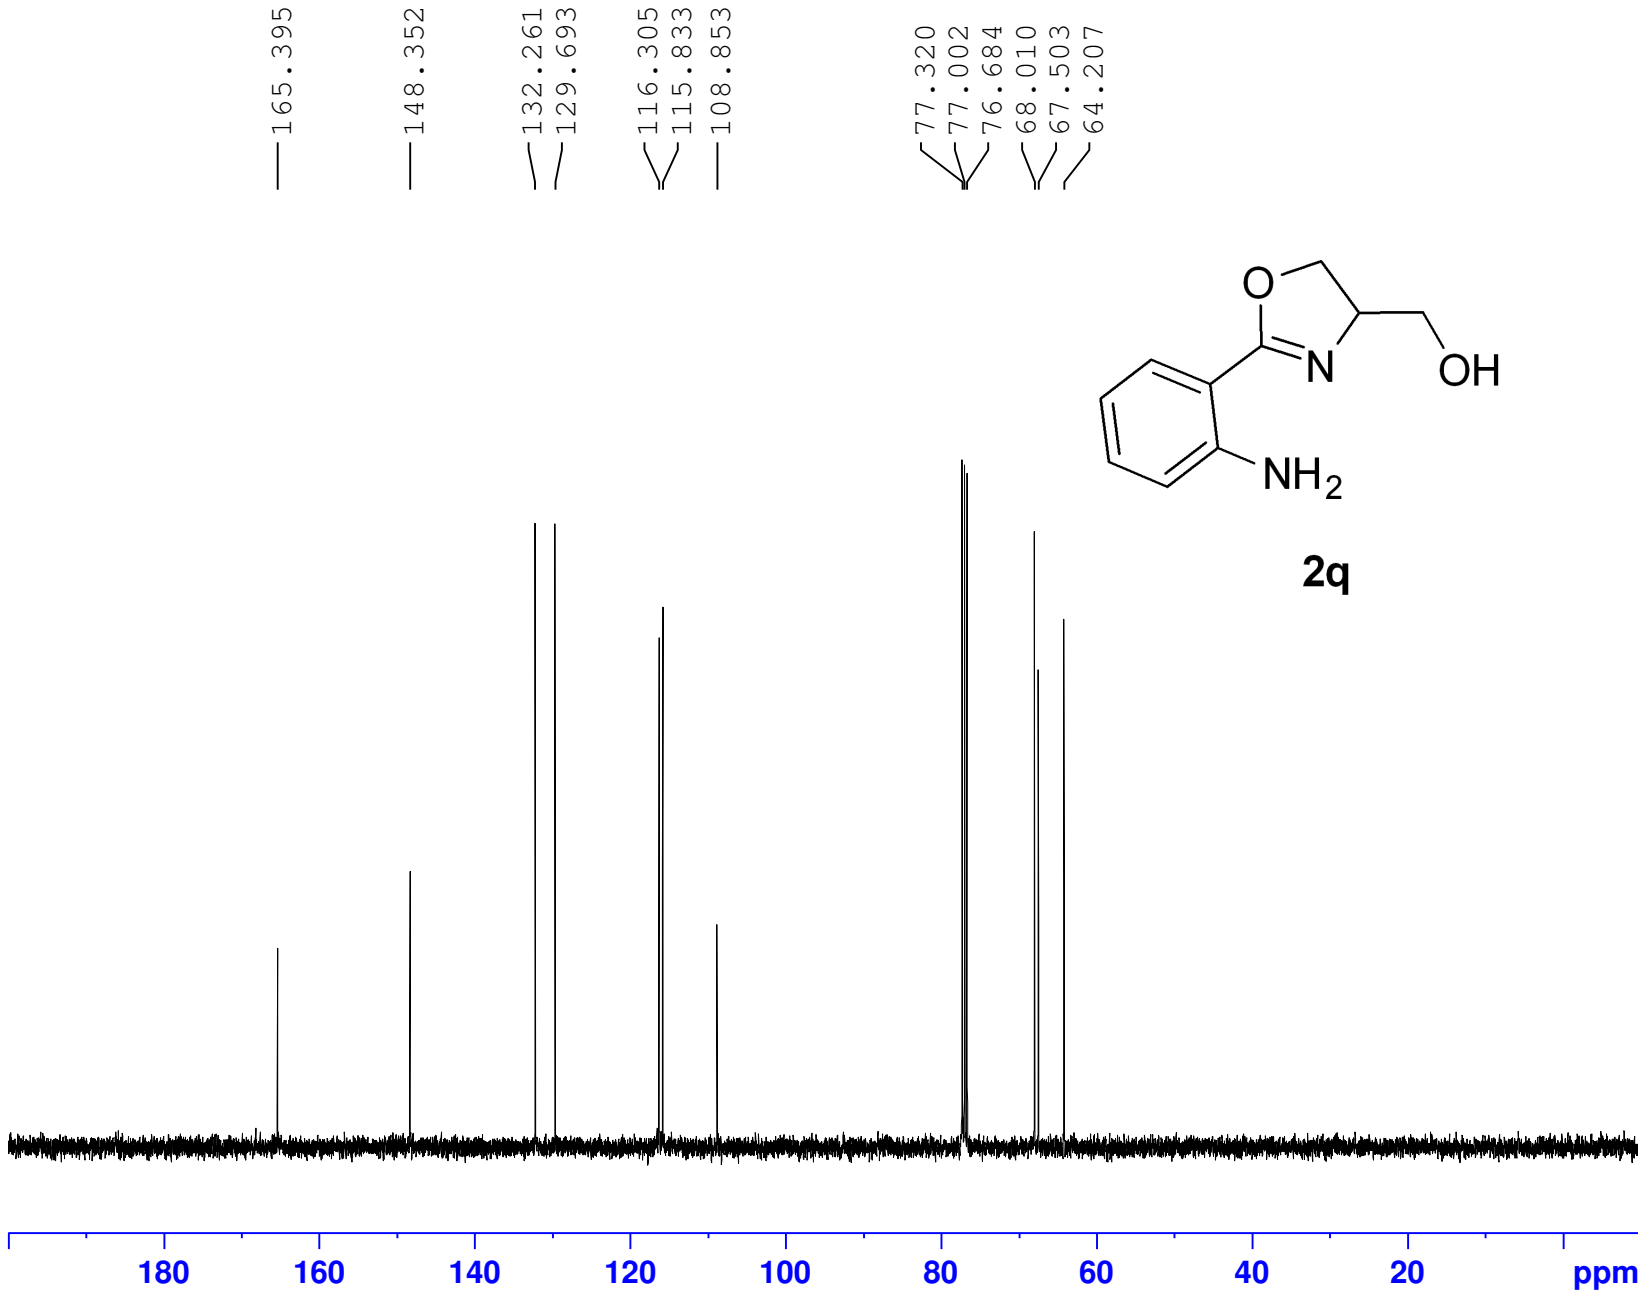

Current Data Parameters  
NAME YW-1742A-carbon  
EXPNO 4  
PROCNO 1

F2 - Acquisition Parameters  
Date\_ 20160420  
Time 20.05  
INSTRUM spect  
PROBHD 5 mm PABBO BB/  
PULPROG zgpg30  
TD 65536  
SOLVENT CDC13  
NS 32  
DS 0  
SWH 24038.461 Hz  
FIDRES 0.366798 Hz  
AQ 1.3631488 sec  
RG 196.92  
DW 20.800 usec  
DE 6.50 usec  
TE 298.0 K  
D1 2.00000000 sec  
D11 0.03000000 sec  
TD0 1

==== CHANNEL f1 =====  
SFO1 100.6228298 MHz  
NUC1 13C  
P1 9.70 usec  
PLW1 46.98899841 W

==== CHANNEL f2 =====  
SFO2 400.1316005 MHz  
NUC2 1H  
CPDPRG[2] waltz16  
PCPD2 90.00 usec  
PLW2 11.99499989 W  
PLW12 0.34213999 W  
PLW13 0.27713001 W

F2 - Processing parameters  
SI 32768  
SF 100.6127810 MHz  
WDW EM  
SSB 0  
LB 1.00 Hz  
GB 0  
PC 1.40



12.137  
7.744  
7.740  
7.729  
7.724  
7.720  
7.708  
7.660  
7.639  
7.375  
7.371  
7.353  
7.336  
7.332  
7.260  
7.202  
7.181  
7.026  
7.024  
7.006  
6.988  
6.986  
4.533  
4.524  
4.520  
4.514  
4.509  
4.499  
4.490  
4.479  
4.421  
4.401  
4.397  
4.376  
4.298  
4.278  
4.258  
3.889  
3.878  
3.860  
3.850  
3.744  
3.734

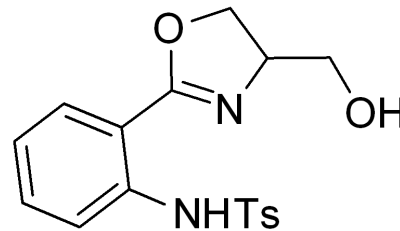

2r

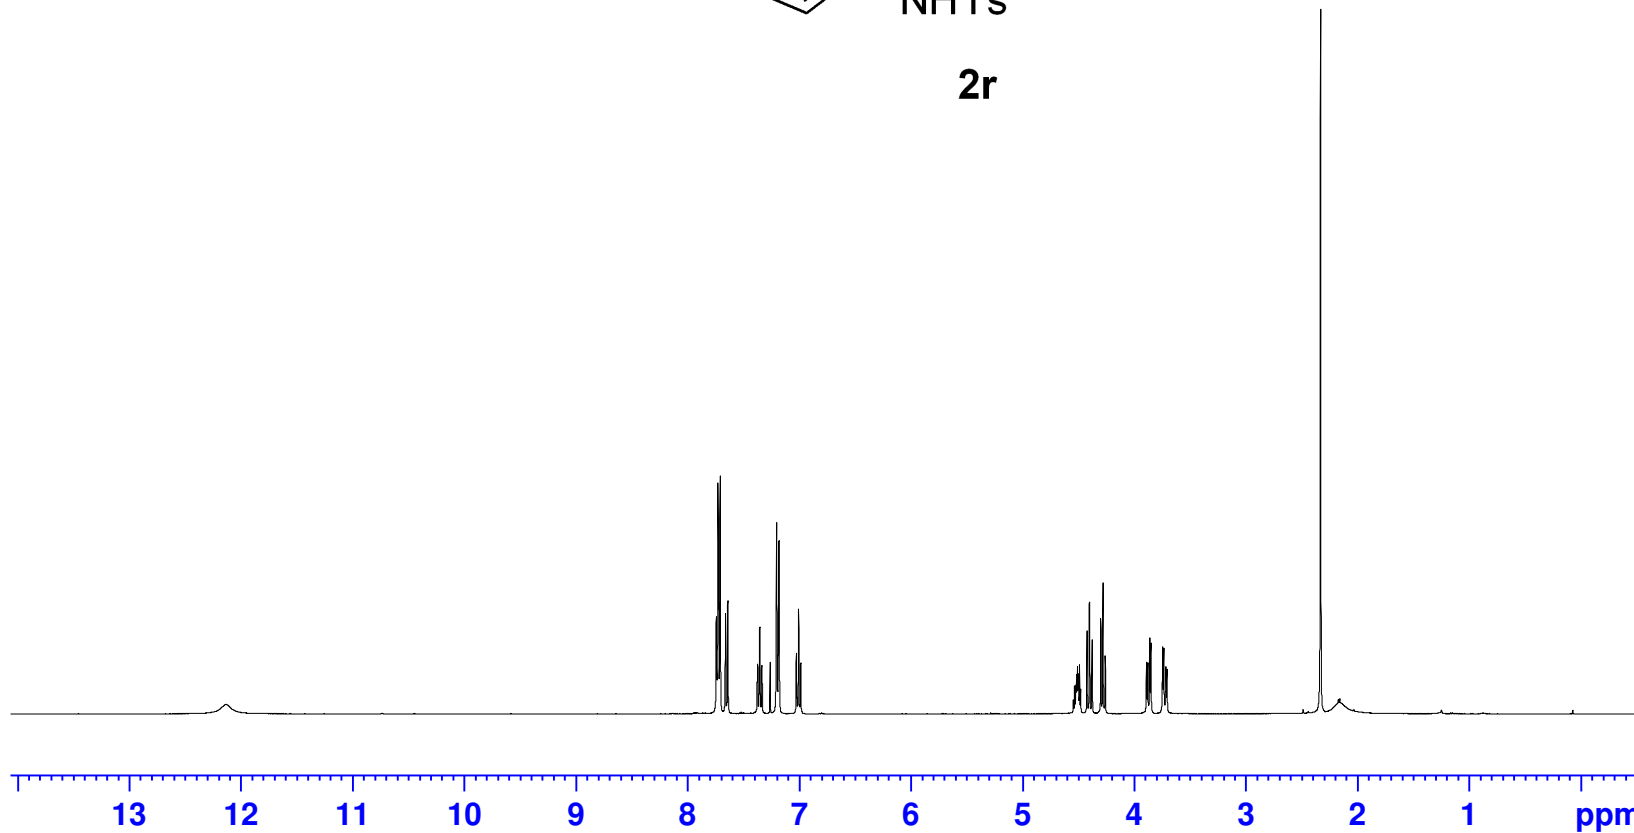

0.87

2.95  
0.99  
1.01  
1.98  
1.00

1.01  
1.00  
1.00  
1.02  
1.01

3.07  
0.93

Current Data Parameters  
NAME YW-1742B  
EXPNO 1  
PROCNO 1

F2 - Acquisition Parameters  
Date\_ 20160422  
Time 20.23  
INSTRUM spect  
PROBHD 5 mm PABBO BB/  
PULPROG zg30  
TD 65536  
SOLVENT CDC13  
NS 3  
DS 0  
SWH 8012.820 Hz  
FIDRES 0.122266 Hz  
AQ 4.0894465 sec  
RG 54.81  
DW 62.400 usec  
DE 6.50 usec  
TE 296.4 K  
D1 1.00000000 sec  
TD0 1

==== CHANNEL f1 =====  
SFO1 400.1324710 MHz  
NUC1 1H  
P1 14.50 usec  
PLW1 11.99499989 W

F2 - Processing parameters  
SI 65536  
SF 400.1300094 MHz  
WDW EM  
SSB 0  
LB 0.30 Hz  
GB 0  
PC 1.00

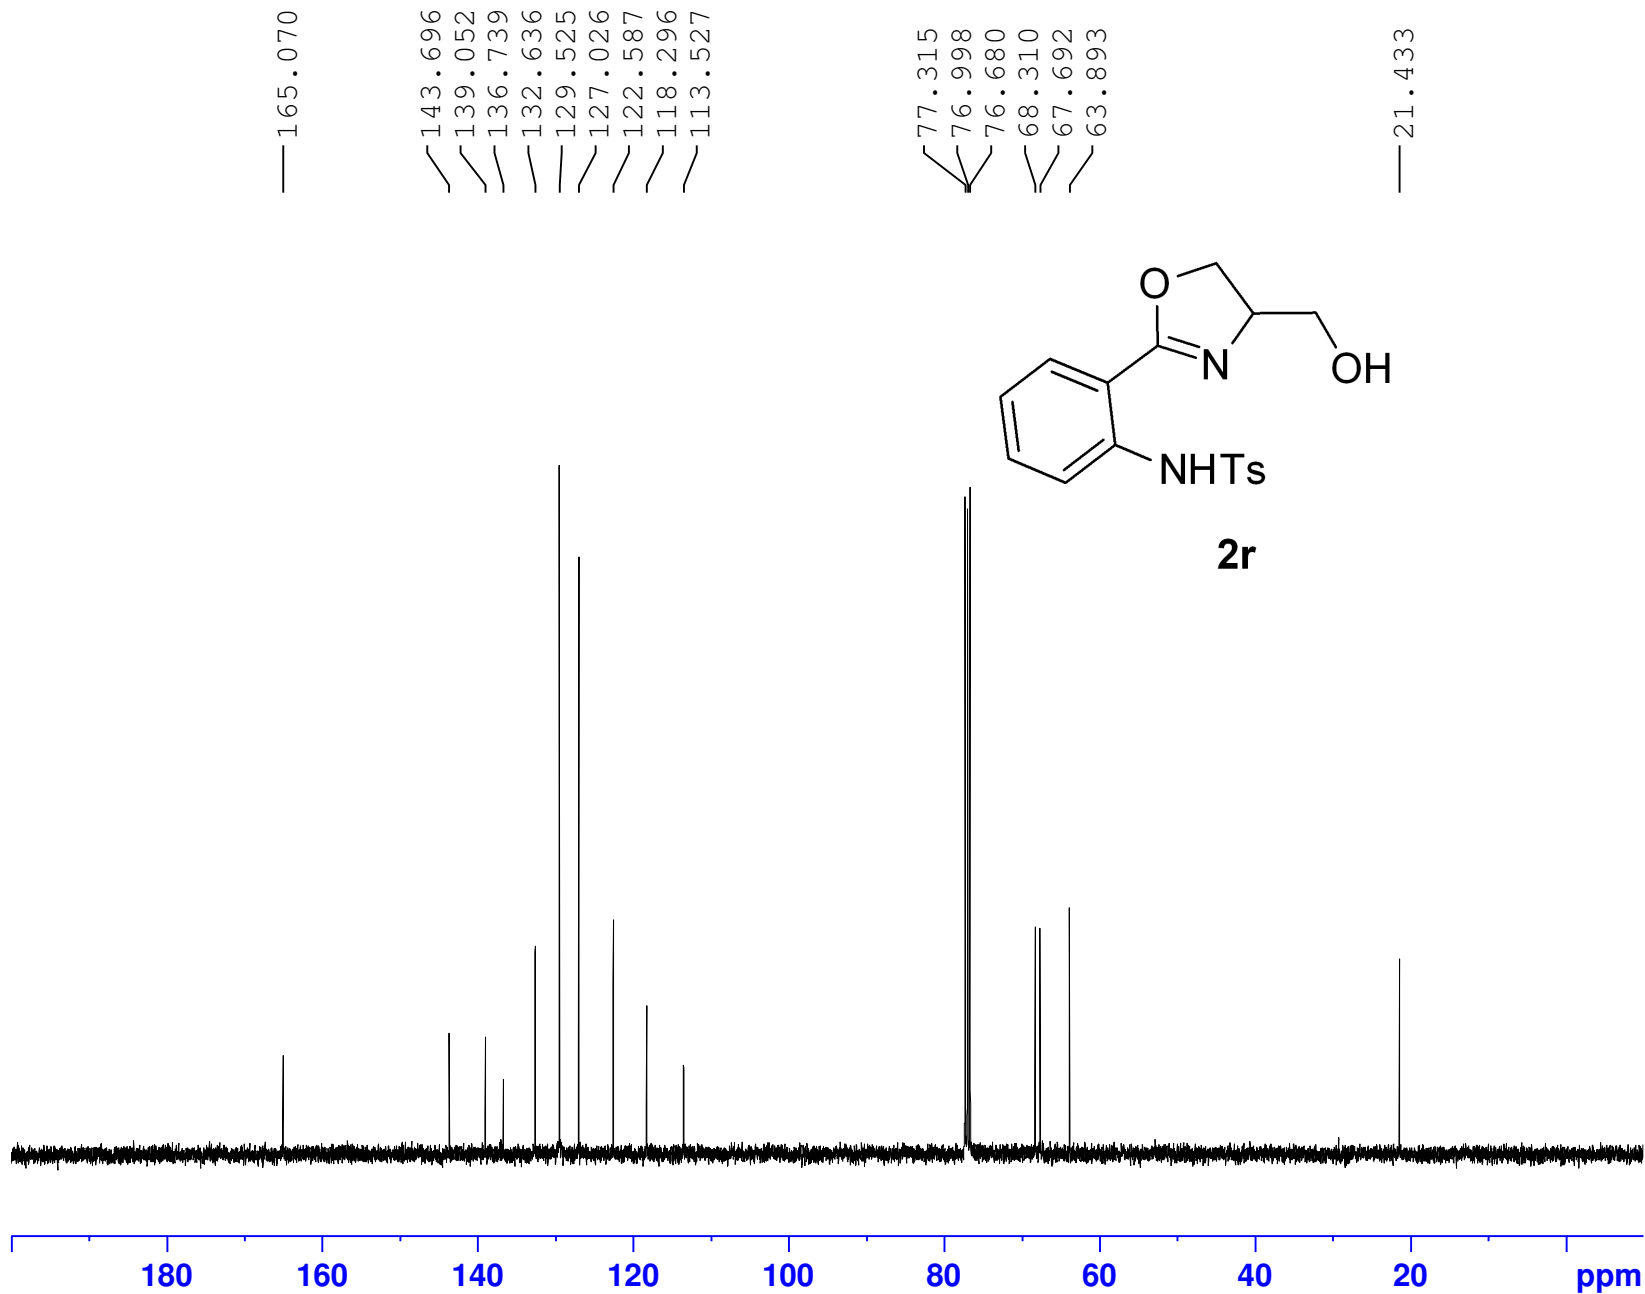

Current Data Parameters  
NAME YW-1742B-carbon  
EXPNO 1  
PROCNO 1

F2 - Acquisition Parameters  
Date\_ 20160422  
Time 20.27  
INSTRUM spect  
PROBHD 5 mm PABBO BB/  
PULPROG zgpg30  
TD 65536  
SOLVENT CDC13  
NS 50  
DS 0  
SWH 24038.461 Hz  
FIDRES 0.366798 Hz  
AQ 1.3631488 sec  
RG 196.92  
DW 20.800 usec  
DE 6.50 usec  
TE 297.4 K  
D1 2.0000000 sec  
D11 0.0300000 sec  
TD0 1

==== CHANNEL f1 =====  
SFO1 100.6228298 MHz  
NUC1 13C  
P1 9.70 usec  
PLW1 46.98899841 W

==== CHANNEL f2 =====  
SFO2 400.1316005 MHz  
NUC2 1H  
CPDPRG[2] waltz16  
PCPD2 90.00 usec  
PLW2 11.99499989 W  
PLW12 0.34213999 W  
PLW13 0.27713001 W

F2 - Processing parameters  
SI 32768  
SF 100.6127765 MHz  
WDW EM  
SSB 0  
LB 1.00 Hz  
GB 0  
PC 1.40



7.804  
7.795  
7.785  
7.777  
7.679  
7.662  
7.647  
7.630  
7.592  
7.573  
7.553  
7.534  
7.523  
7.504  
7.491  
7.484  
7.474  
7.471  
7.466  
7.451  
7.444  
7.432  
7.427  
7.414  
7.406  
7.379  
7.361  
7.259  
7.119  
7.100  
7.084  
7.065  
5.526  
4.591  
4.573  
4.556  
4.315  
4.295  
4.290  
4.270  
4.190  
4.172  
4.150  
3.870  
3.867  
3.840  
3.448  
3.422

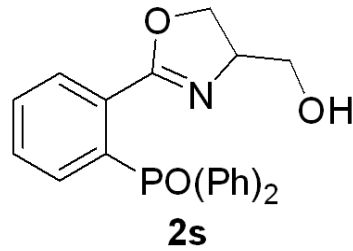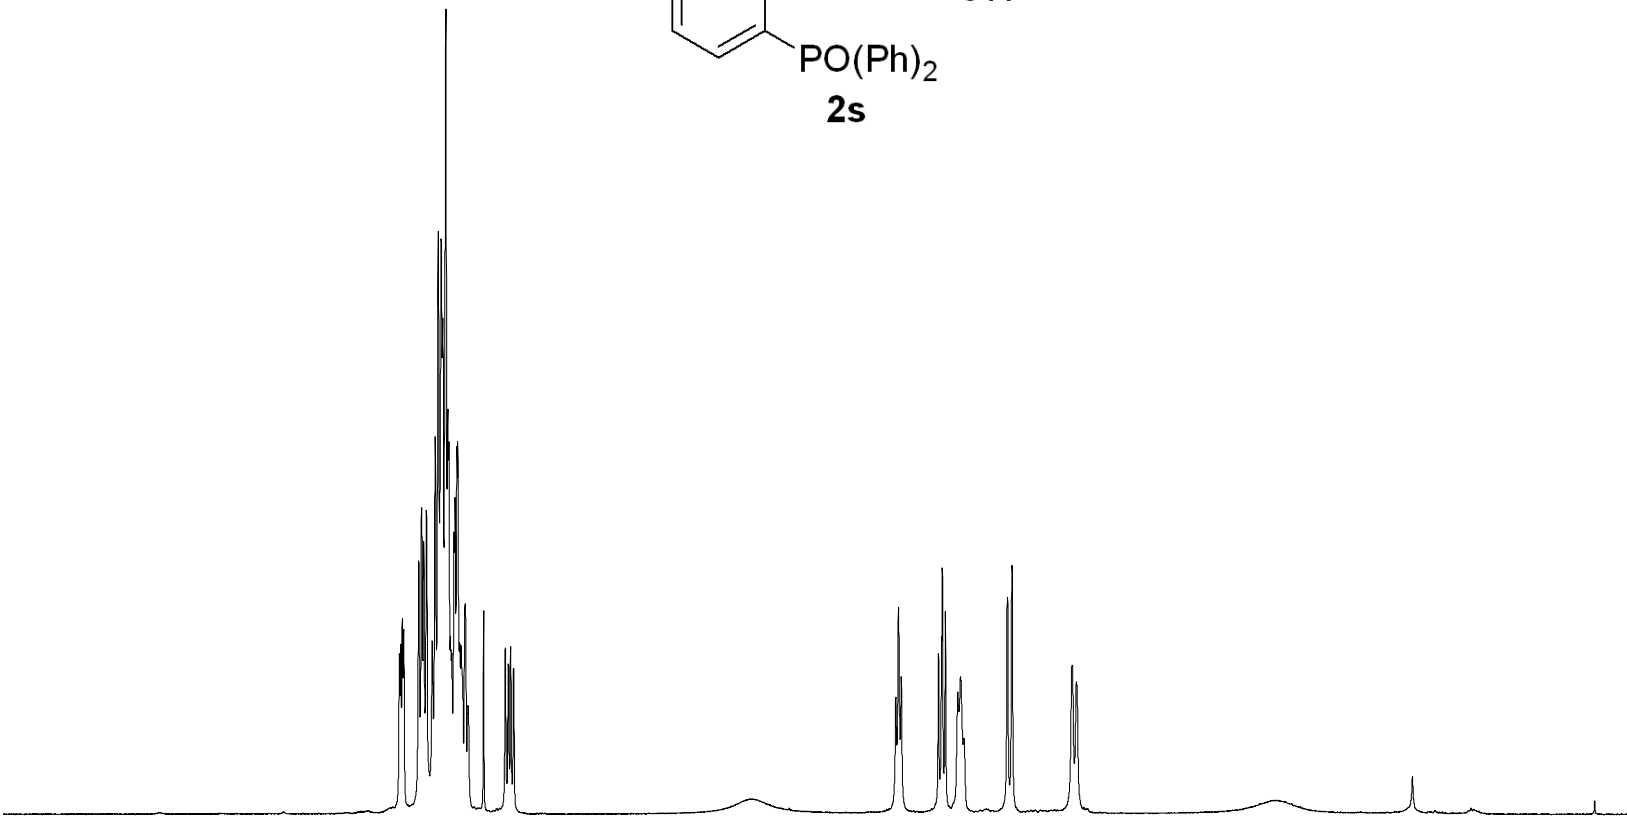

1.02  
2.19  
10.48  
1.02  
0.81  
1.00  
1.03  
1.02  
1.02  
1.03

Current Data Parameters  
NAME czl-2-8-HNMR  
EXPNO 1  
PROCNO 1

F2 - Acquisition Parameters  
Date\_ 20170825  
Time 14.03  
INSTRUM spect  
PROBHD 5 mm PABBO BB/  
PULPROG zg30  
TD 65536  
SOLVENT CDC13  
NS 4  
DS 2  
SWH 8012.820 Hz  
FIDRES 0.122266 Hz  
AQ 4.0894465 sec  
RG 70.97  
DW 62.400 usec  
DE 6.50 usec  
TE 295.7 K  
D1 1.00000000 sec  
TD0 1

==== CHANNEL f1 =====  
SFO1 400.1324710 MHz  
NUC1 1H  
P1 14.50 usec  
PLW1 11.99499989 W

F2 - Processing parameters  
SI 65536  
SF 400.1300107 MHz  
WDW EM  
SSB 0  
LB 0.30 Hz  
GB 0  
PC 1.00

10 9 8 7 6 5 4 3 2 1 ppm



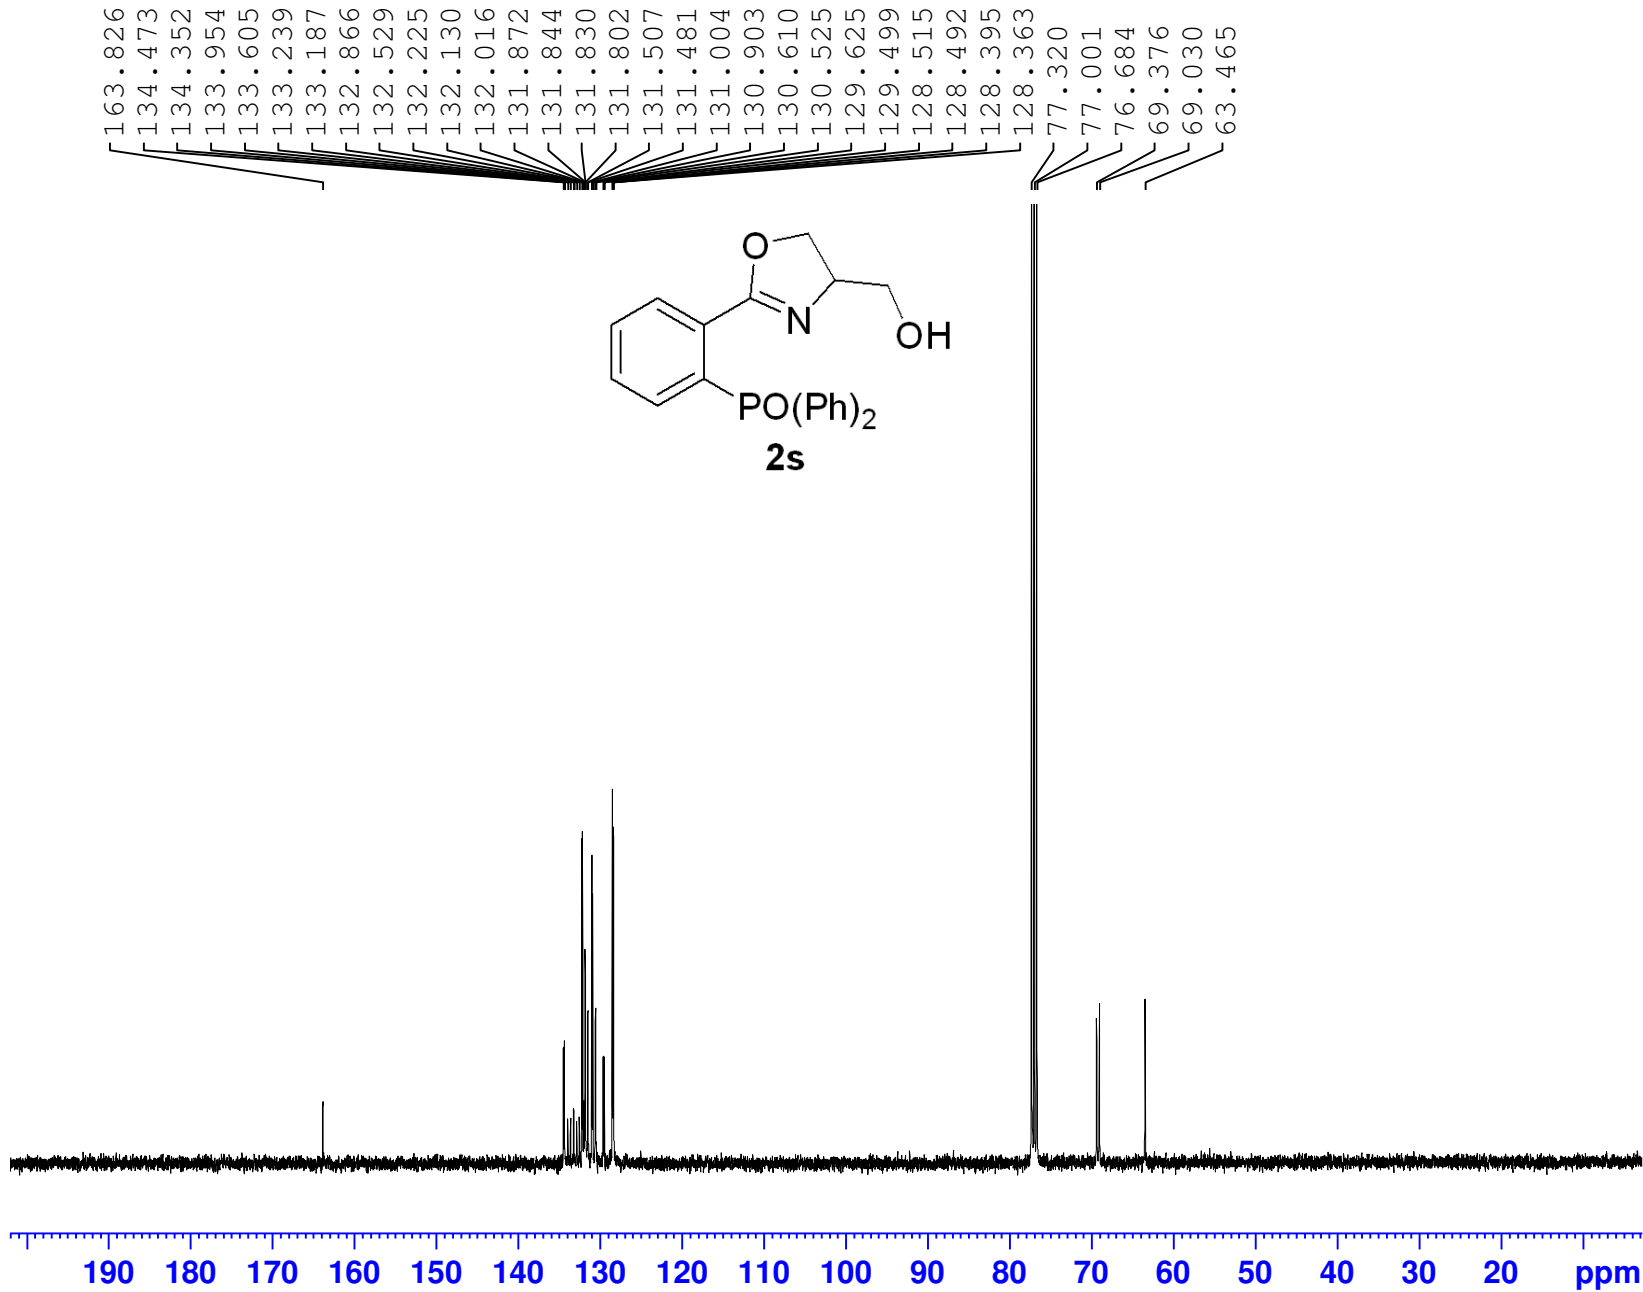

Current Data Parameters  
NAME czl-2-8-CNMR  
EXPNO 1  
PROCNO 1

F2 - Acquisition Parameters  
Date\_ 20170825  
Time 14.11  
INSTRUM spect  
PROBHD 5 mm PABBO BB/  
PULPROG zgpg30  
TD 65536  
SOLVENT CDC13  
NS 415  
DS 2  
SWH 24038.461 Hz  
FIDRES 0.366798 Hz  
AQ 1.3631488 sec  
RG 196.92  
DW 20.800 usec  
DE 6.50 usec  
TE 296.2 K  
D1 2.00000000 sec  
D11 0.03000000 sec  
TD0 1

==== CHANNEL f1 =====  
SFO1 100.6228298 MHz  
NUC1 13C  
P1 9.70 usec  
PLW1 46.98899841 W

==== CHANNEL f2 =====  
SFO2 400.1316005 MHz  
NUC2 1H  
CPDPRG[2] waltz16  
PCPD2 90.00 usec  
PLW2 11.99499989 W  
PLW12 0.34213999 W  
PLW13 0.27713001 W

F2 - Processing parameters  
SI 32768  
SF 100.6127773 MHz  
WDW EM  
SSB 0  
LB 1.00 Hz  
GB 0  
PC 1.40



Current Data Parameters  
NAME czl-2-8-PNMR  
EXPNO 1  
PROCNO 1

F2 - Acquisition Parameters  
Date\_ 20170825  
Time 14.33  
INSTRUM spect  
PROBHD 5 mm PABBO BB/  
PULPROG zgpg30  
TD 65536  
SOLVENT CDC13  
NS 32  
DS 4  
SWH 64102.563 Hz  
FIDRES 0.978127 Hz  
AQ 0.5111808 sec  
RG 196.92  
DW 7.800 usec  
DE 6.50 usec  
TE 296.5 K  
D1 2.0000000 sec  
D11 0.0300000 sec  
TD0 1

=====  
CHANNEL f1  
SFO1 161.9674942 MHz  
NUC1 31P  
P1 14.70 usec  
PLW1 11.99499989 W

=====  
CHANNEL f2  
SFO2 400.1316005 MHz  
NUC2 1H  
CPDPRG[2] waltz16  
PCPD2 90.00 usec  
PLW2 11.99499989 W  
PLW12 0.34213999 W  
PLW13 0.27713001 W

F2 - Processing parameters  
SI 32768  
SF 161.9755930 MHz  
WDW EM  
SSB 0  
LB 1.00 Hz  
GB 0  
PC 1.40

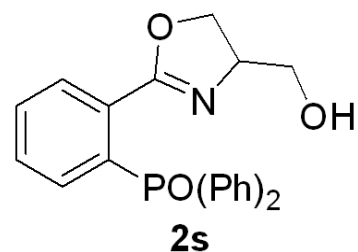

33.54

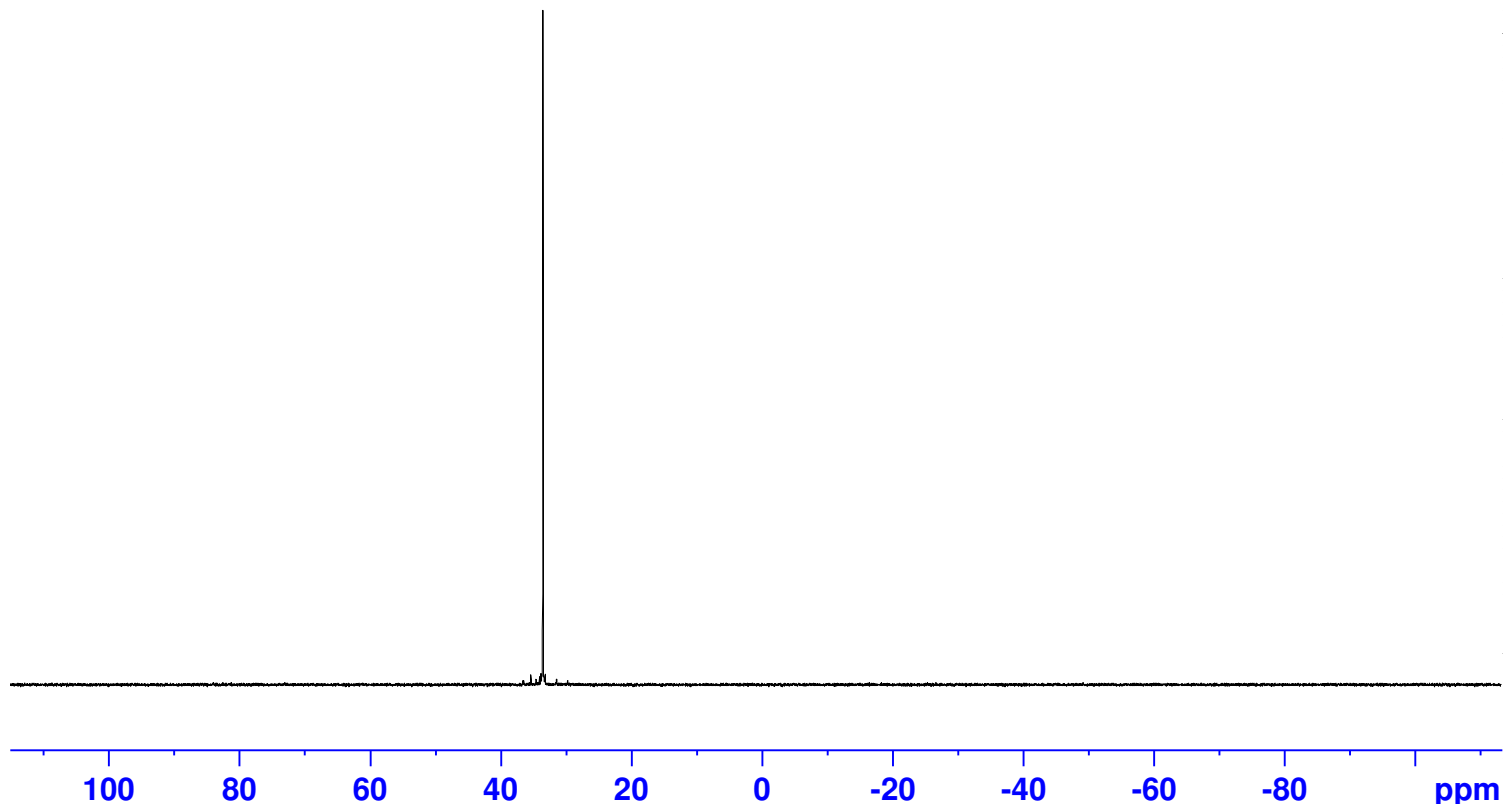

S-154



8.650  
8.648  
8.646  
8.644  
8.638  
8.636  
8.634  
8.632  
7.942  
7.924  
7.922  
7.752  
7.748  
7.733  
7.728  
7.713  
7.709  
7.373  
7.370  
7.361  
7.358  
7.354  
7.351  
7.342  
7.339  
7.260  
4.580  
4.564  
4.557  
4.540  
4.520  
4.511  
4.502  
4.492  
4.482  
4.479  
4.469  
4.440  
4.423  
4.405  
3.989  
3.980  
3.960  
3.951  
3.718  
3.708  
3.689  
3.679

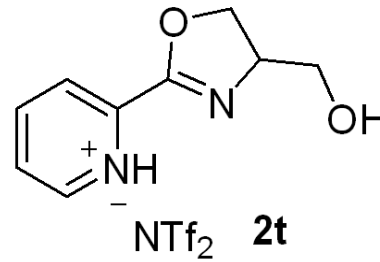

Current Data Parameters  
NAME cz1-2-7-second  
EXPNO 1  
PROCNO 1

F2 - Acquisition Parameters  
Date\_ 20170823  
Time 16.41  
INSTRUM spect  
PROBHD 5 mm PABBO BB/  
PULPROG zg30  
TD 65536  
SOLVENT CDC13  
NS 4  
DS 0  
SWH 8012.820 Hz  
FIDRES 0.122266 Hz  
AQ 4.0894465 sec  
RG 88.84  
DW 62.400 usec  
DE 6.50 usec  
TE 296.2 K  
D1 1.00000000 sec  
TD0 1

==== CHANNEL f1 =====  
SFO1 400.1324710 MHz  
NUC1 1H  
P1 14.50 usec  
PLW1 11.99499989 W

F2 - Processing parameters  
SI 65536  
SF 400.1300102 MHz  
WDW EM  
SSB 0  
LB 0.30 Hz  
GB 0  
PC 1.00

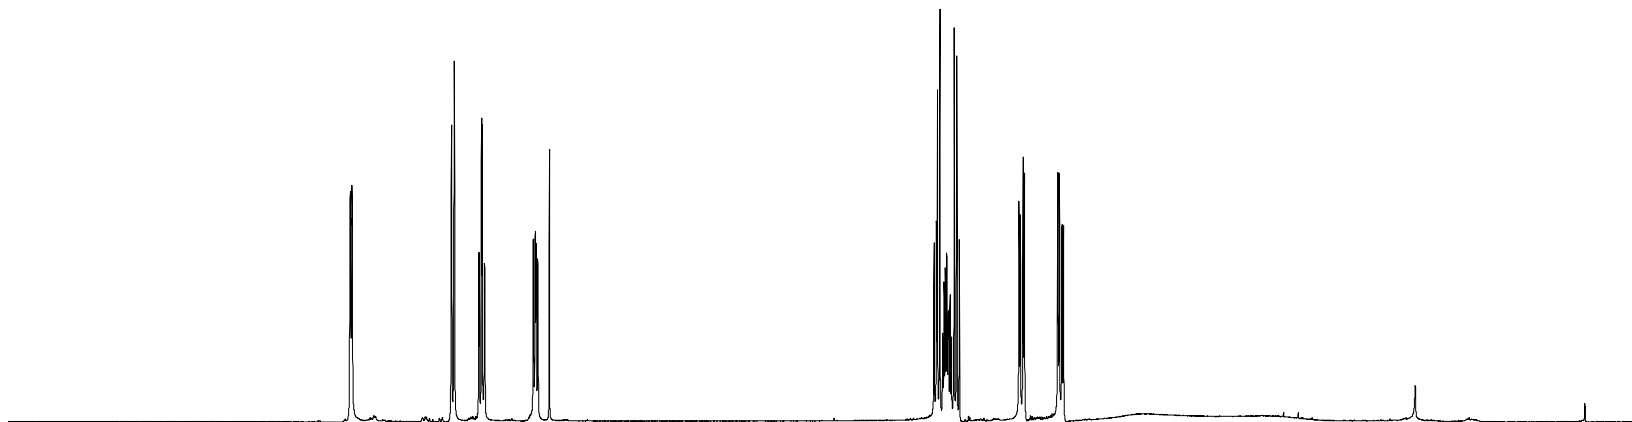

10 9 8 7 6 5 4 3 2 1 ppm

1.01

1.00

1.05

1.05

3.16

1.07

1.10

S-155



— 164.270  
— 149.695  
— 146.086  
— 136.678  
— 125.721  
— 123.870  
— 77.321  
— 77.003  
— 76.685  
— 69.869  
— 68.352  
— 63.866

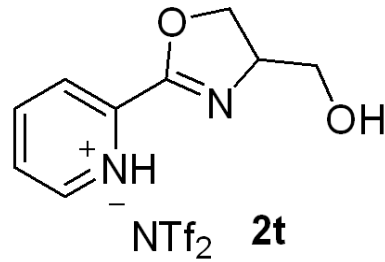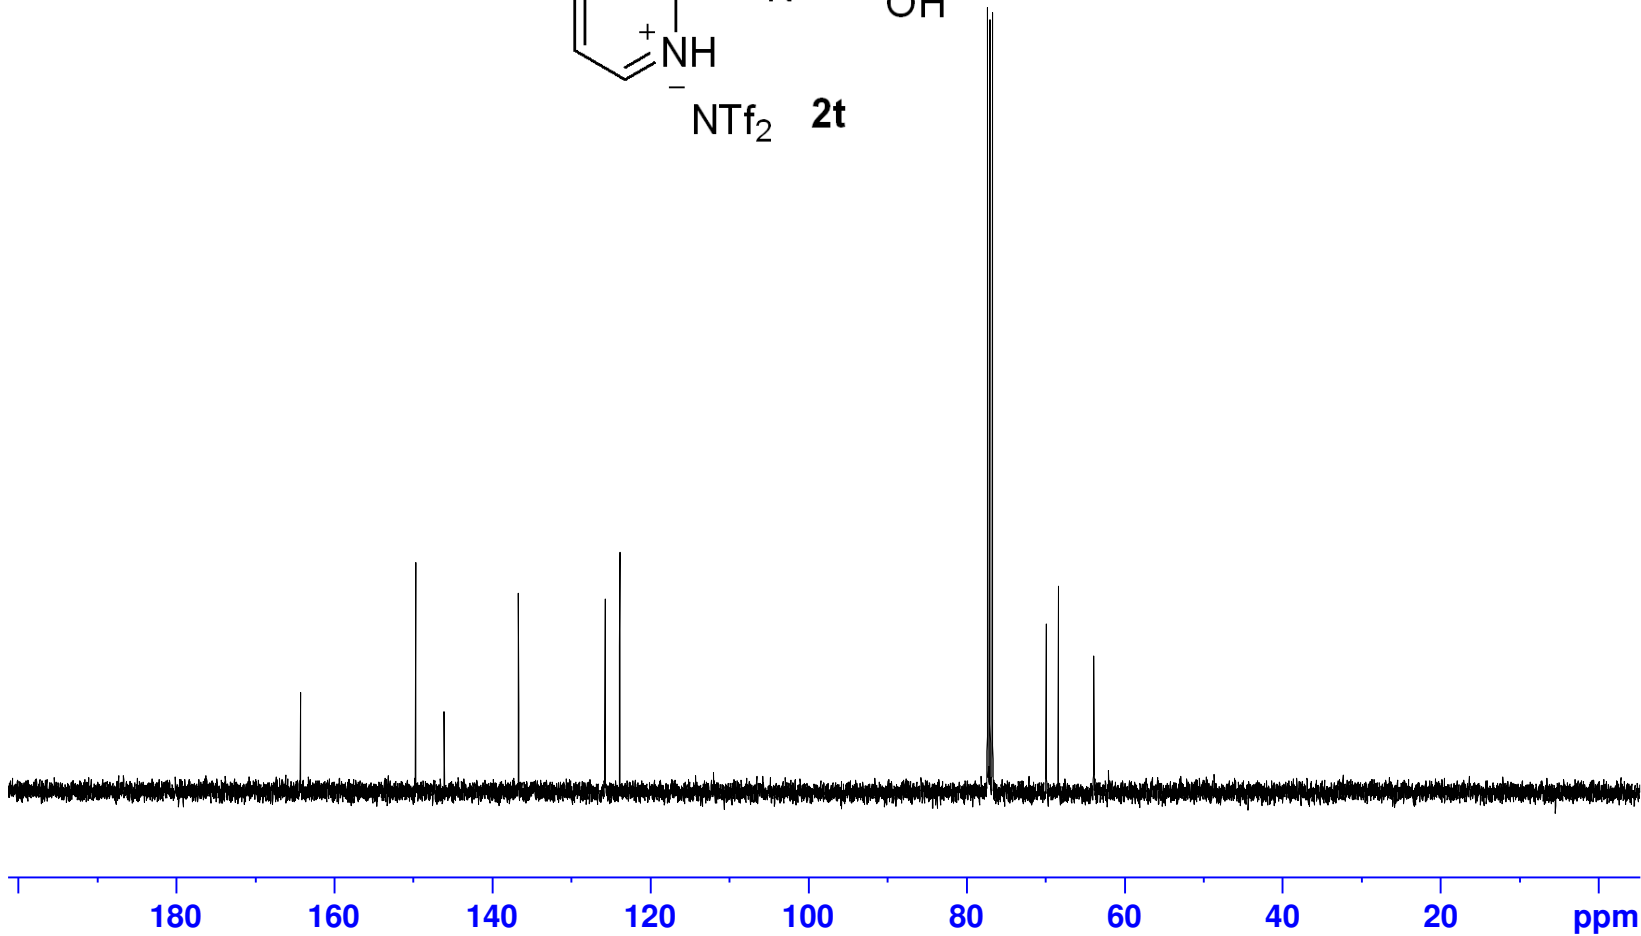

Current Data Parameters  
NAME czl-2-7-second  
EXPNO 2  
PROCNO 1

F2 - Acquisition Parameters  
Date\_ 20170823  
Time 16.44  
INSTRUM spect  
PROBHD 5 mm PABBO BB/  
PULPROG zgpg30  
TD 65536  
SOLVENT CDC13  
NS 62  
DS 2  
SWH 24038.461 Hz  
FIDRES 0.366798 Hz  
AQ 1.3631488 sec  
RG 196.92  
DW 20.800 usec  
DE 6.50 usec  
TE 296.7 K  
D1 2.00000000 sec  
D11 0.03000000 sec  
TD0 1

==== CHANNEL f1 =====  
SFO1 100.6228298 MHz  
NUC1 13C  
P1 9.70 usec  
PLW1 46.98899841 W

==== CHANNEL f2 =====  
SFO2 400.1316005 MHz  
NUC2 1H  
CPDPRG[2] waltz16  
PCPD2 90.00 usec  
PLW2 11.99499989 W  
PLW12 0.34213999 W  
PLW13 0.27713001 W

F2 - Processing parameters  
SI 32768  
SF 100.6127751 MHz  
WDW EM  
SSB 0  
LB 1.00 Hz  
GB 0  
PC 1.40



8.549  
8.548  
8.491  
8.472  
8.170  
8.151  
7.866  
7.862  
7.847  
7.843  
7.828  
7.823  
7.453  
7.451  
7.441  
7.439  
7.434  
7.432  
7.423  
7.420  
7.260  
4.456  
4.443  
4.434  
4.431  
4.422  
4.409  
4.006  
3.992  
3.980  
3.964  
3.952  
3.901  
3.889  
3.873  
3.861  
3.847  
3.834  
3.823  
3.809  
3.795  
3.781

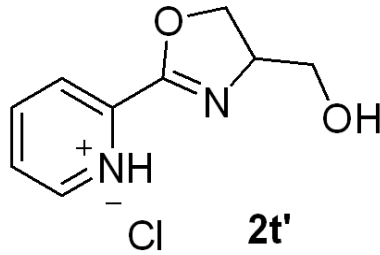

Current Data Parameters  
NAME czl-2-4-second  
EXPNO 1  
PROCNO 1

F2 - Acquisition Parameters  
Date\_ 20170823  
Time 16.35  
INSTRUM spect  
PROBHD 5 mm PABBO BB/  
PULPROG zg30  
TD 65536  
SOLVENT CDC13  
NS 4  
DS 2  
SWH 8012.820 Hz  
FIDRES 0.122266 Hz  
AQ 4.0894465 sec  
RG 103.52  
DW 62.400 usec  
DE 6.50 usec  
TE 296.3 K  
D1 1.00000000 sec  
TD0 1

==== CHANNEL f1 =====  
SFO1 400.1324710 MHz  
NUC1 1H  
P1 14.50 usec  
PLW1 11.99499989 W

F2 - Processing parameters  
SI 65536  
SF 400.1300102 MHz  
WDW EM  
SSB 0  
LB 0.30 Hz  
GB 0  
PC 1.00

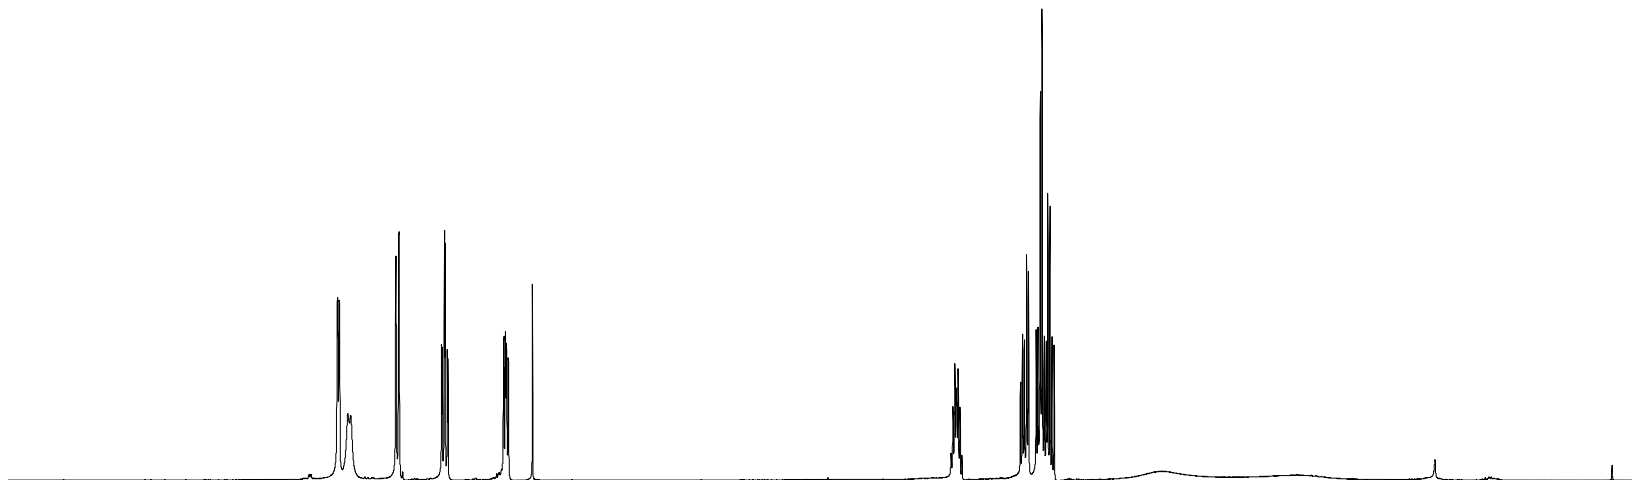

10 9 8 7 6 5 4 3 2 1 ppm

1.04  
0.90  
1.02  
1.03  
1.02

1.00  
1.13  
3.02

S-157



— 164.611  
— 149.175  
— 148.219  
— 137.447  
— 126.502  
— 122.360  
— 77.320  
— 77.002  
— 76.684  
— 61.757  
— 51.849  
— 43.875

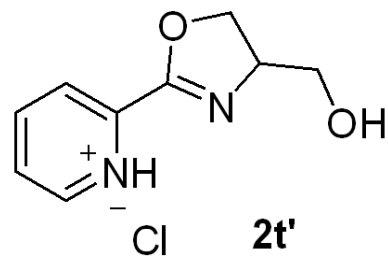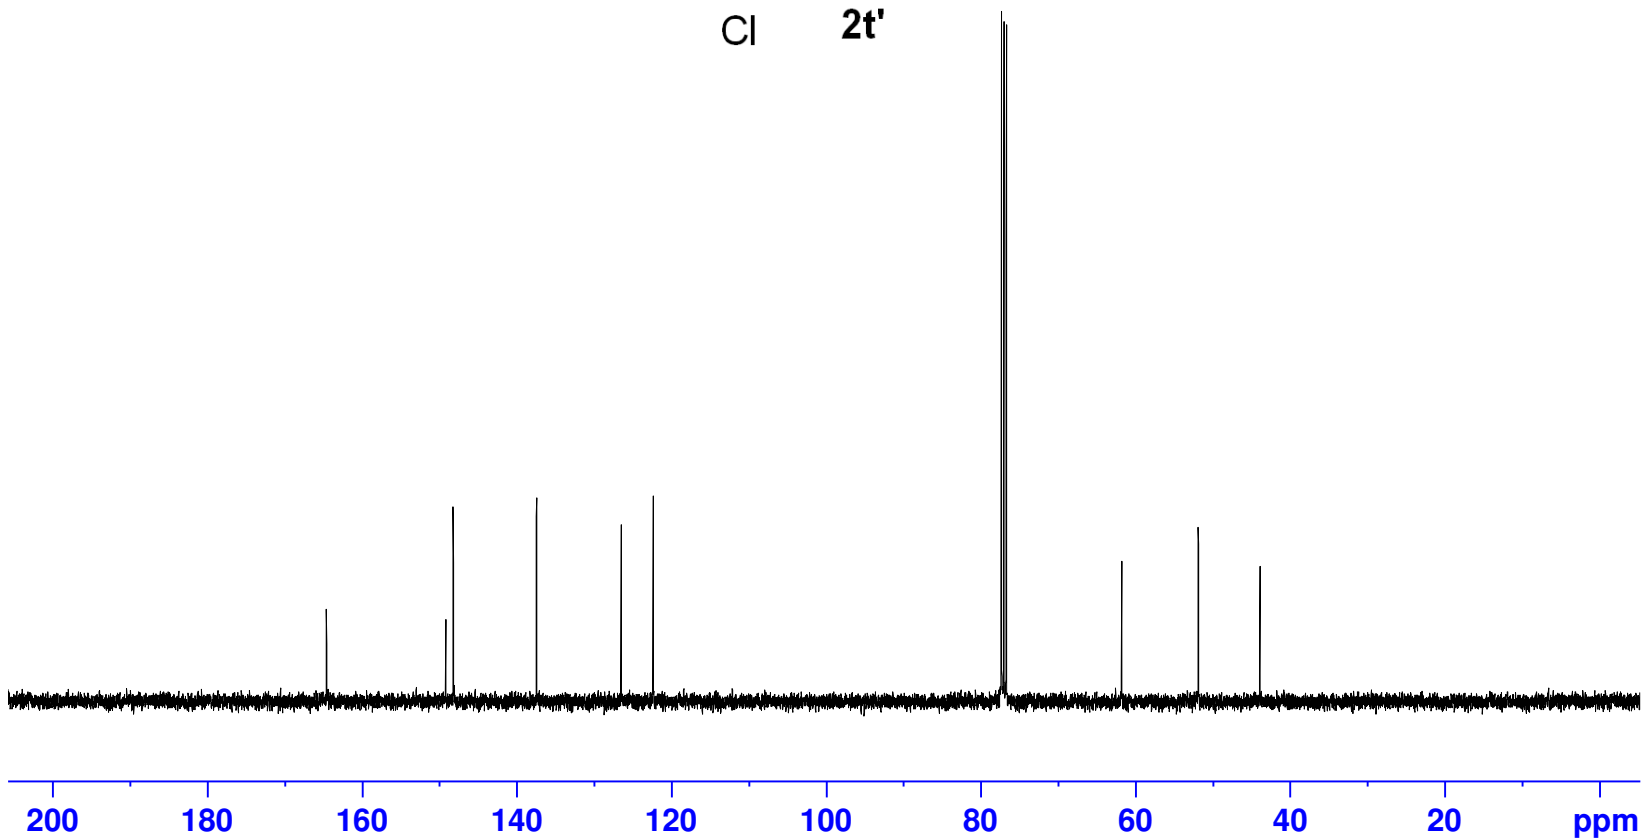

Current Data Parameters  
NAME czl-2-4-second  
EXPNO 2  
PROCNO 1

F2 - Acquisition Parameters  
Date\_ 20170823  
Time 16.54  
INSTRUM spect  
PROBHD 5 mm PABBO BB/  
PULPROG zgpg30  
TD 65536  
SOLVENT CDC13  
NS 87  
DS 2  
SWH 24038.461 Hz  
FIDRES 0.366798 Hz  
AQ 1.3631488 sec  
RG 196.92  
DW 20.800 usec  
DE 6.50 usec  
TE 296.4 K  
D1 2.00000000 sec  
D11 0.03000000 sec  
TD0 1

==== CHANNEL f1 =====  
SFO1 100.6228298 MHz  
NUC1 13C  
P1 9.70 usec  
PLW1 46.98899841 W

==== CHANNEL f2 =====  
SFO2 400.1316005 MHz  
NUC2 1H  
CPDPRG[2] waltz16  
PCPD2 90.00 usec  
PLW2 11.99499989 W  
PLW12 0.34213999 W  
PLW13 0.27713001 W

F2 - Processing parameters  
SI 32768  
SF 100.6127737 MHz  
WDW EM  
SSB 0  
LB 1.00 Hz  
GB 0  
PC 1.40



Current Data Parameters  
NAME cz1-2-7-second  
EXPNO 3  
PROCNO 1

F2 - Acquisition Parameters  
Date\_ 20170823  
Time 16.47  
INSTRUM spect  
PROBHD 5 mm PABBO BB/  
PULPROG zgflqn  
TD 131072  
SOLVENT CDCl3  
NS 16  
DS 4  
SWH 89285.711 Hz  
FIDRES 0.681196 Hz  
AQ 0.7340032 sec  
RG 196.92  
DW 5.600 usec  
DE 6.50 usec  
TE 296.3 K  
D1 1.00000000 sec  
TD0 1

==== CHANNEL f1 =====  
SFO1 376.4607164 MHz  
NUC1 19F  
P1 14.70 usec  
PLW1 15.99600029 W

F2 - Processing parameters  
SI 65536  
SF 376.4983660 MHz  
WDW EM  
SSB 0  
LB 0.30 Hz  
GB 0  
PC 1.00

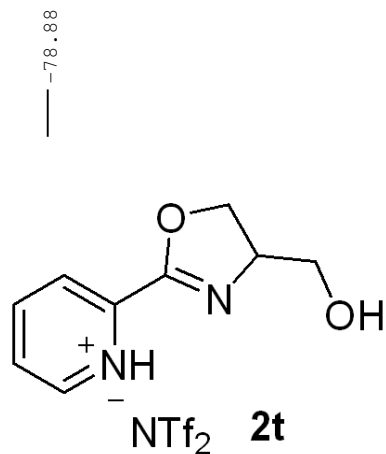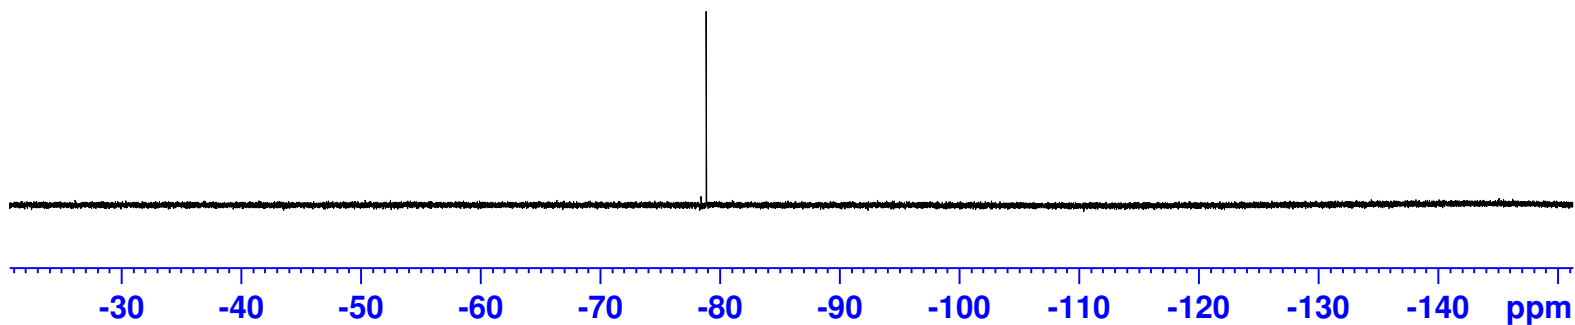



8.037  
8.016  
7.995  
7.535  
7.517  
7.499  
7.488  
7.449  
7.428  
7.410  
7.390  
7.372  
7.352  
7.304  
7.286  
7.269  
7.259  
4.884  
4.864  
4.547  
4.527  
3.957  
3.928  
3.771  
3.742

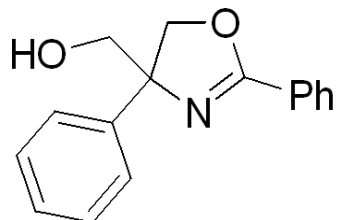

2u

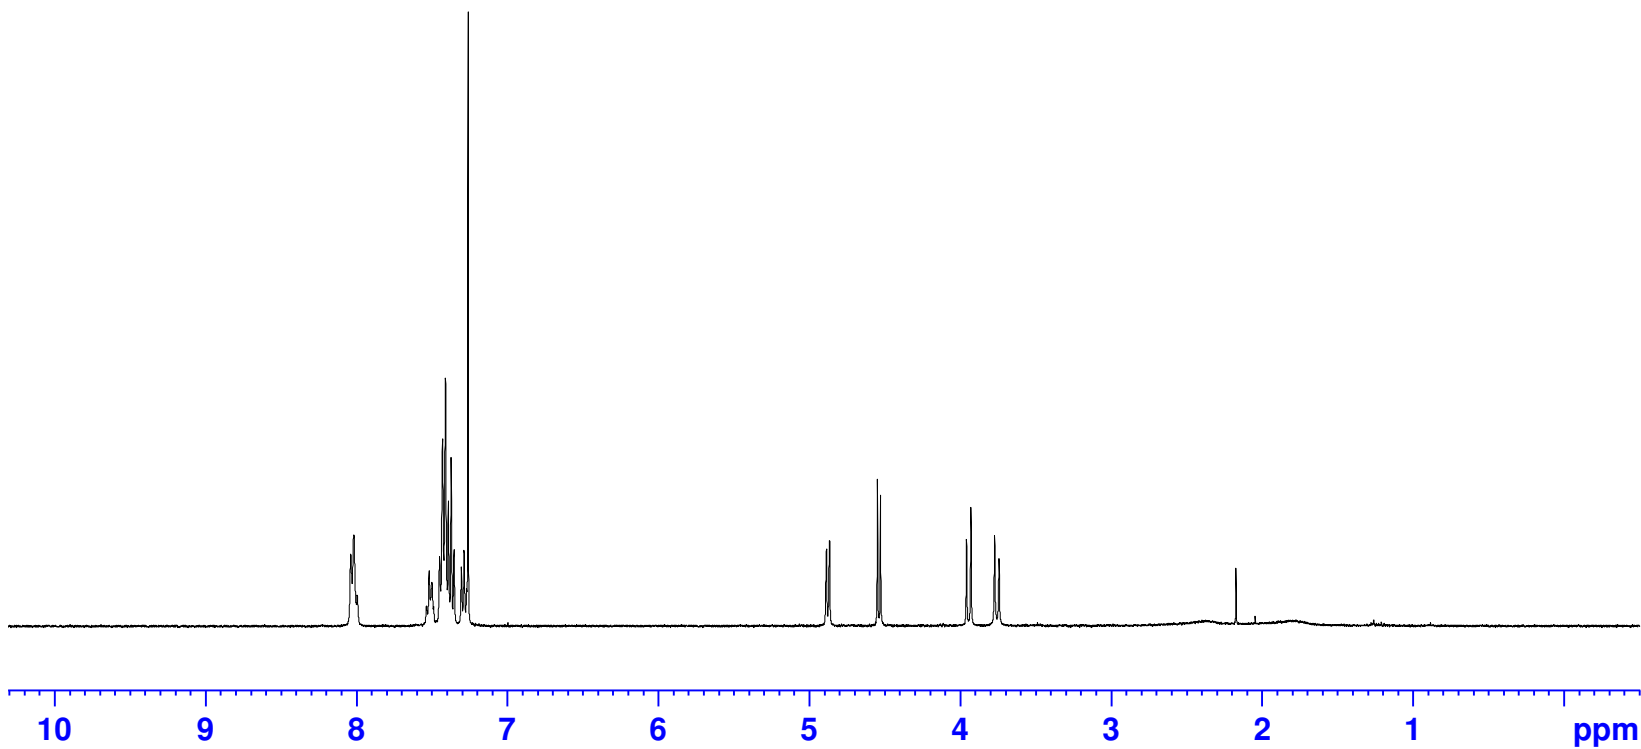

2.01  
1.08  
6.00  
1.03

1.06  
1.07  
1.09  
1.07  
S-160

Current Data Parameters  
NAME czl-1-188-A H  
EXPNO 1  
PROCNO 1

F2 - Acquisition Parameters  
Date\_ 20170805  
Time 16.17  
INSTRUM spect  
PROBHD 5 mm PABBO BB/  
PULPROG zg30  
TD 65536  
SOLVENT CDCl3  
NS 4  
DS 2  
SWH 8012.820 Hz  
FIDRES 0.122266 Hz  
AQ 4.0894465 sec  
RG 196.92  
DW 62.400 usec  
DE 6.50 usec  
TE 296.1 K  
D1 1.00000000 sec  
TD0 1

==== CHANNEL f1 =====  
SFO1 400.1324710 MHz  
NUC1 1H  
P1 14.50 usec  
PLW1 11.99499989 W

F2 - Processing parameters  
SI 65536  
SF 400.1300104 MHz  
WDW EM  
SSB 0  
LB 0.30 Hz  
GB 0  
PC 1.00



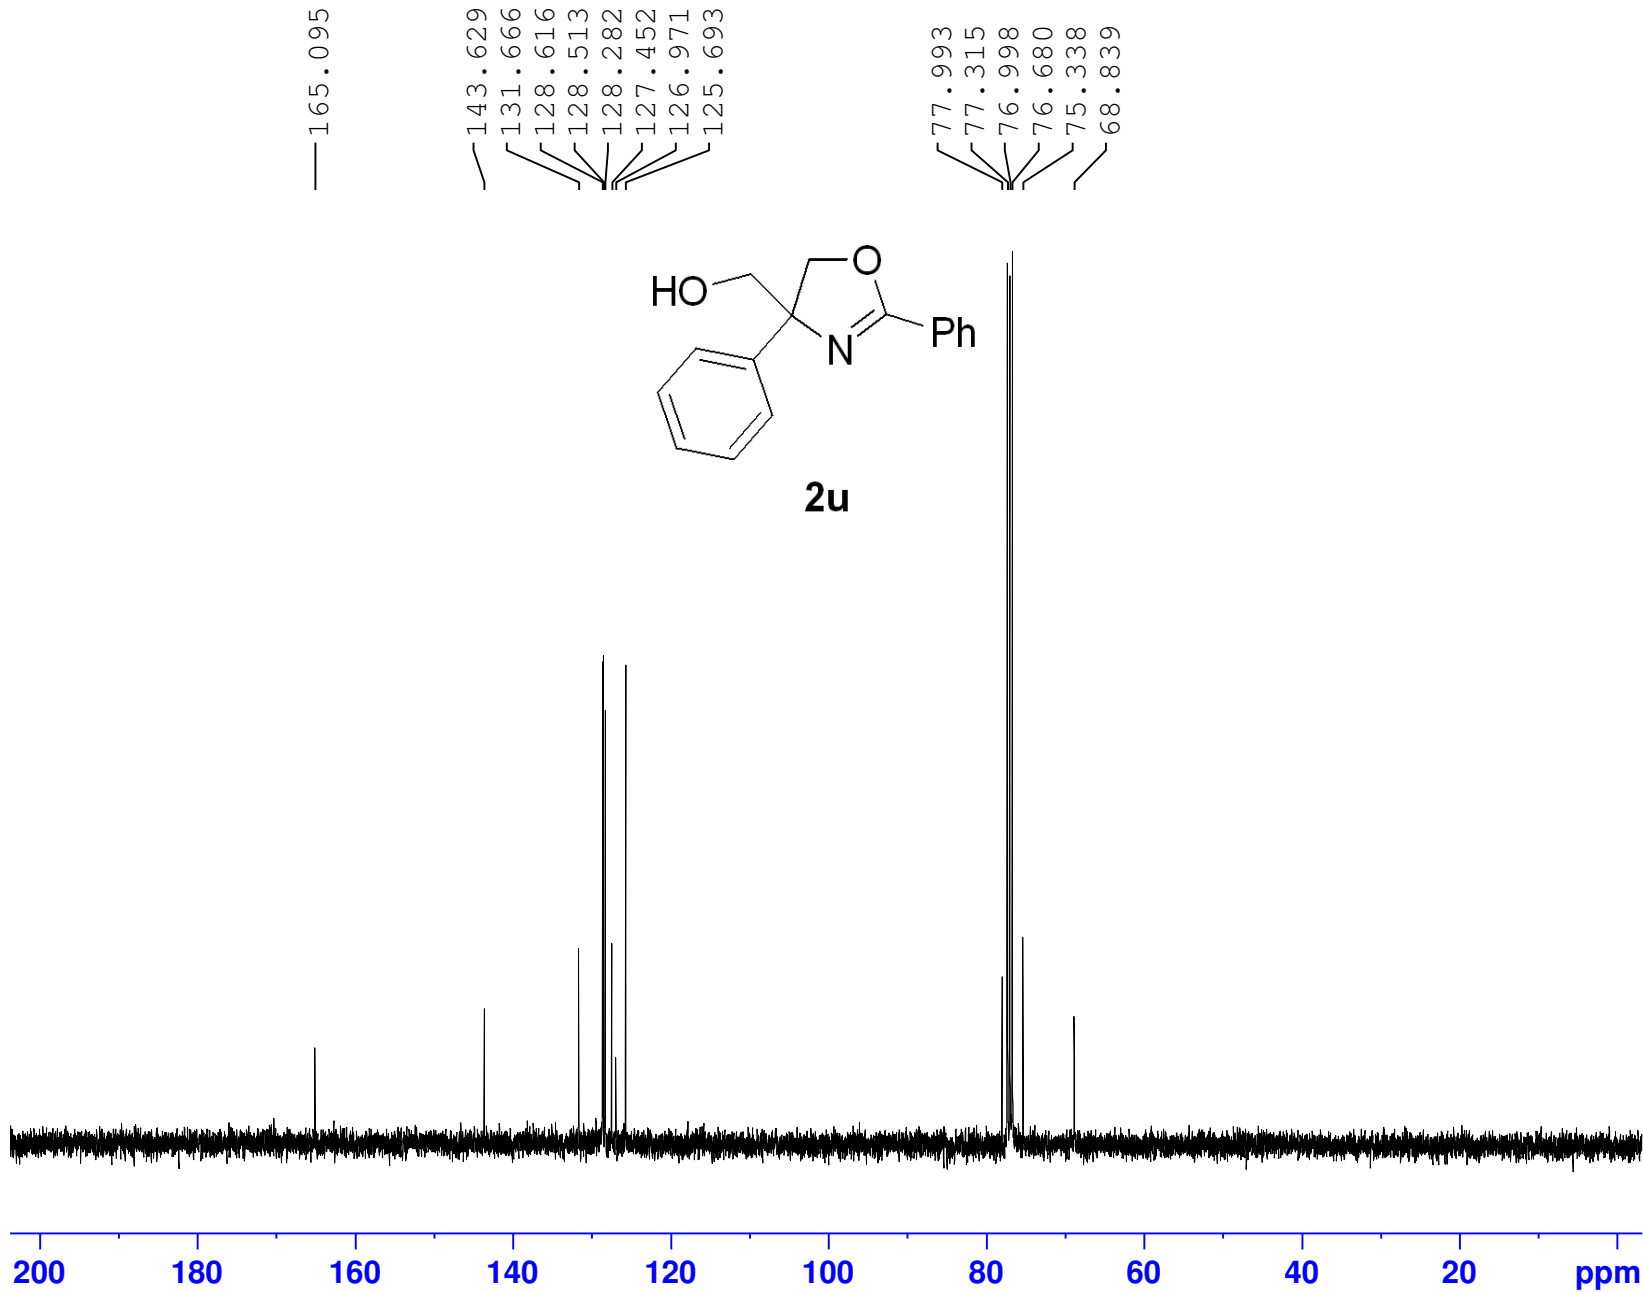

Current Data Parameters  
NAME czl-1-188A- C  
EXPNO 2  
PROCNO 1

F2 - Acquisition Parameters  
Date\_ 20170805  
Time 12.36  
INSTRUM spect  
PROBHD 5 mm PABBO BB/  
PULPROG zgpg30  
TD 65536  
SOLVENT CDC13  
NS 18  
DS 2  
SWH 24038.461 Hz  
FIDRES 0.366798 Hz  
AQ 1.3631488 sec  
RG 196.92  
DW 20.800 usec  
DE 6.50 usec  
TE 298.3 K  
D1 2.00000000 sec  
D11 0.03000000 sec  
TD0 1

==== CHANNEL f1 =====  
SFO1 100.6228298 MHz  
NUC1 13C  
P1 9.70 usec  
PLW1 46.98899841 W

==== CHANNEL f2 =====  
SFO2 400.1316005 MHz  
NUC2 1H  
CPDPRG[2] waltz16  
PCPD2 90.00 usec  
PLW2 11.99499989 W  
PLW12 0.34213999 W  
PLW13 0.27713001 W

F2 - Processing parameters  
SI 32768  
SF 100.6127736 MHz  
WDW EM  
SSB 0  
LB 1.00 Hz  
GB 0  
PC 1.40

7.921  
7.903  
7.900  
7.492  
7.474  
7.455  
7.384  
7.364  
7.353  
7.351  
7.346  
7.331  
7.326  
7.311  
7.303  
7.259

4.866  
4.846  
4.470  
4.449  
3.907  
3.877  
3.717  
3.688

— 0.073

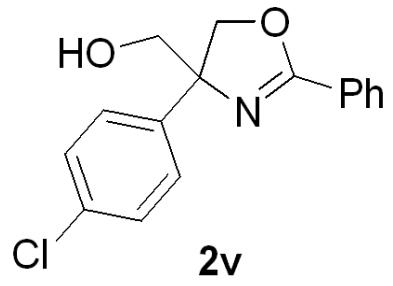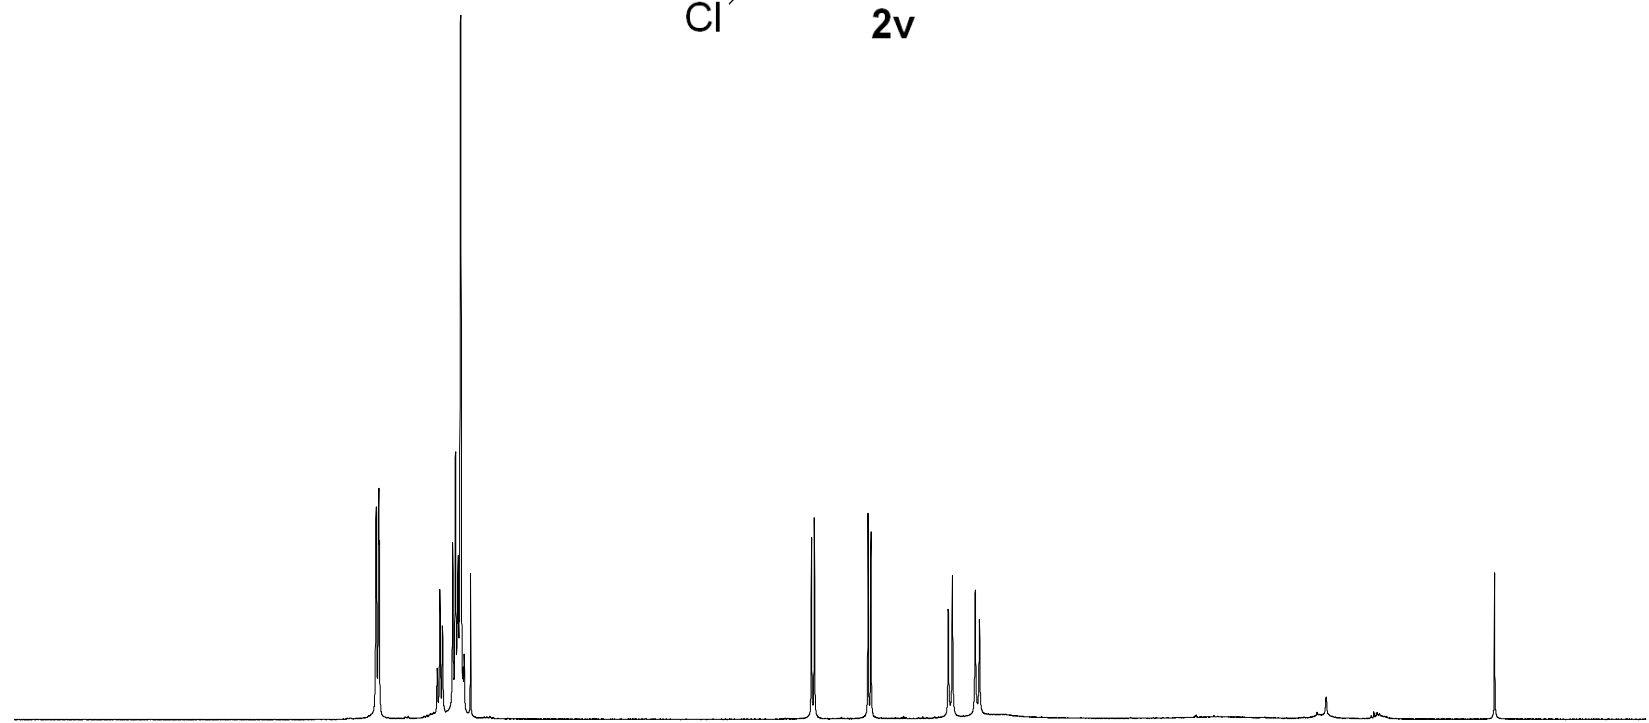

Current Data Parameters  
 NAME czl-1-188-B H  
 EXPNO 1  
 PROCNO 1

F2 - Acquisition Parameters  
 Date\_ 20170805  
 Time 16.21  
 INSTRUM spect  
 PROBHD 5 mm PABBO BB/  
 PULPROG zg30  
 TD 65536  
 SOLVENT CDCl3  
 NS 4  
 DS 2  
 SWH 8012.820 Hz  
 FIDRES 0.122266 Hz  
 AQ 4.0894465 sec  
 RG 187.77  
 DW 62.400 usec  
 DE 6.50 usec  
 TE 296.1 K  
 D1 1.00000000 sec  
 TD0 1

==== CHANNEL f1 =====  
 SFO1 400.1324710 MHz  
 NUC1 1H  
 P1 14.50 usec  
 PLW1 11.99499989 W

F2 - Processing parameters  
 SI 65536  
 SF 400.1300107 MHz  
 WDW EM  
 SSB 0  
 LB 0.30 Hz  
 GB 0  
 PC 1.00

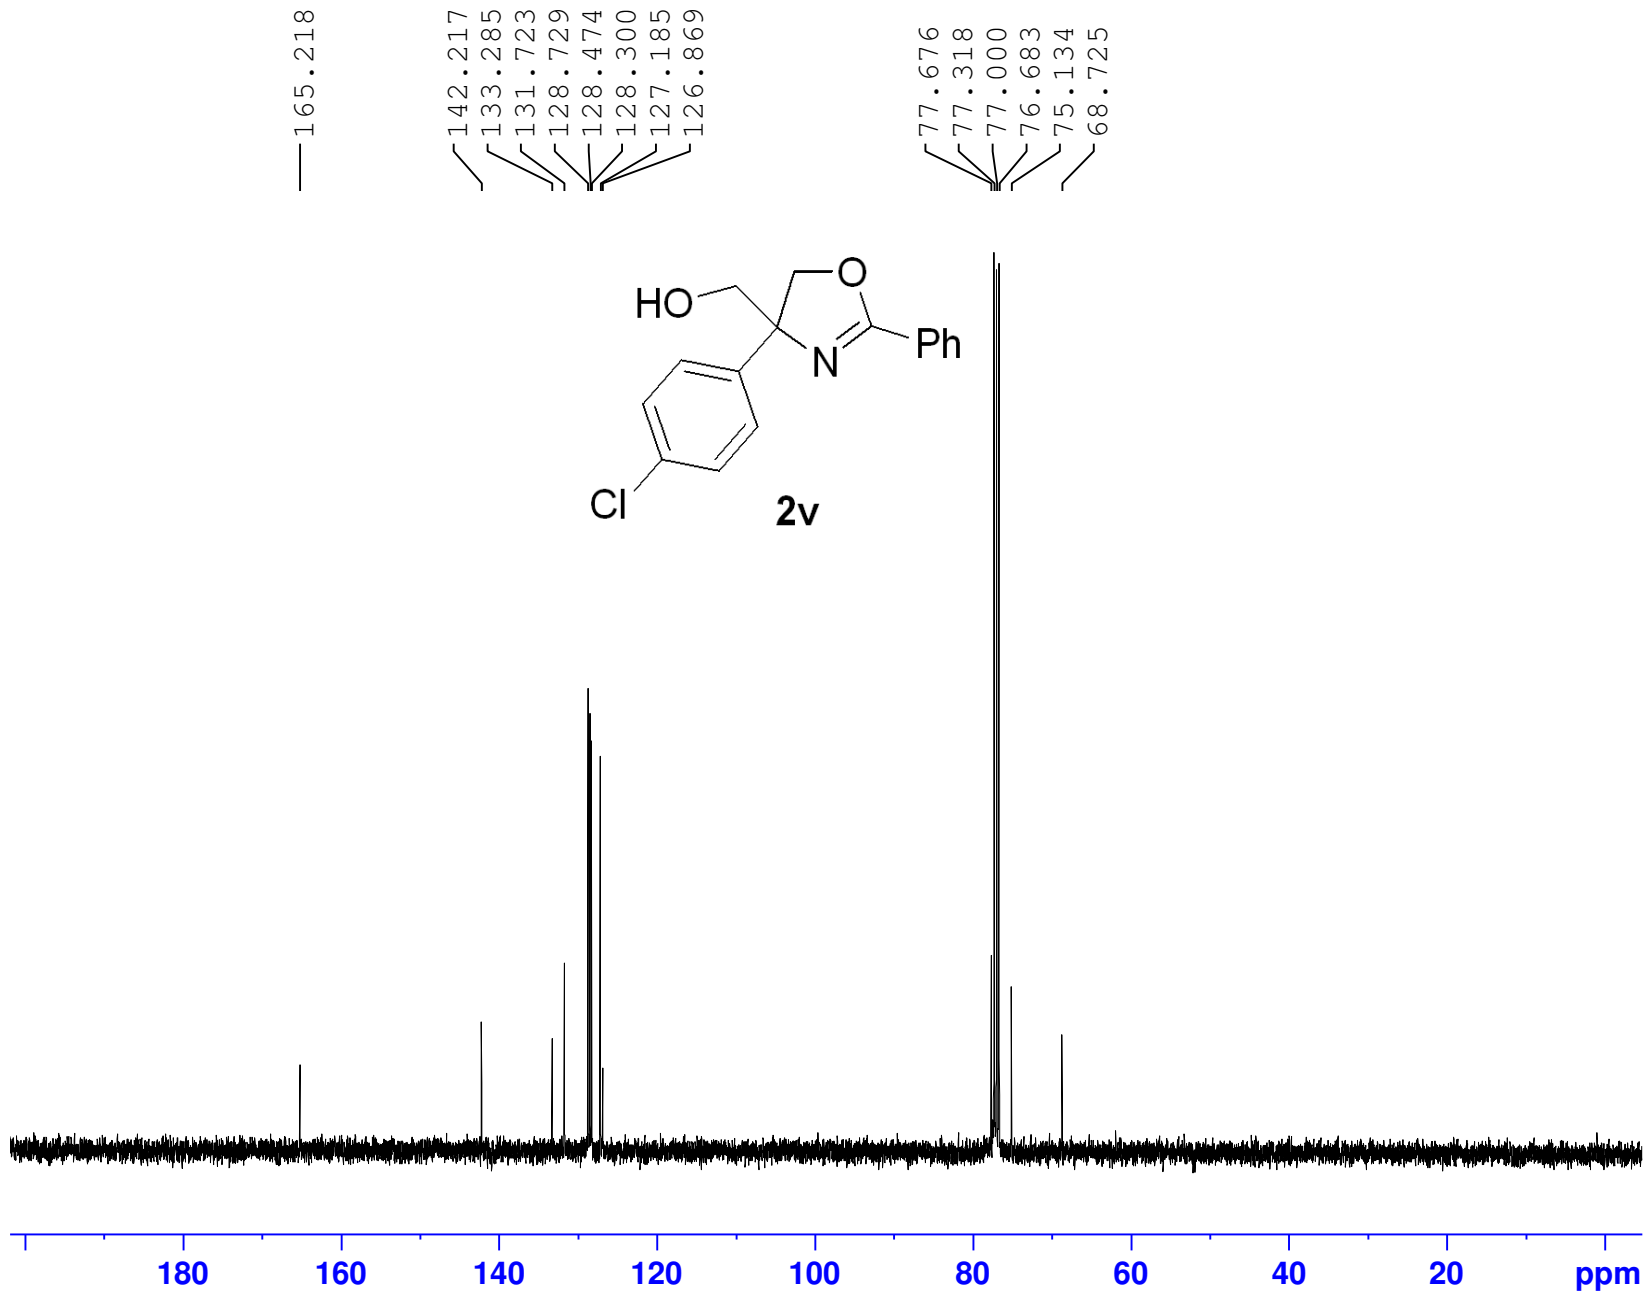

Current Data Parameters  
NAME czl-1-188B- C  
EXPNO 1  
PROCNO 1

F2 - Acquisition Parameters  
Date\_ 20170805  
Time 10.44  
INSTRUM spect  
PROBHD 5 mm PABBO BB/  
PULPROG zgpg30  
TD 65536  
SOLVENT CDC13  
NS 62  
DS 2  
SWH 24038.461 Hz  
FIDRES 0.366798 Hz  
AQ 1.3631488 sec  
RG 196.92  
DW 20.800 usec  
DE 6.50 usec  
TE 297.3 K  
D1 2.00000000 sec  
D11 0.03000000 sec  
TD0 1

==== CHANNEL f1 =====  
SFO1 100.6228298 MHz  
NUC1 13C  
P1 9.70 usec  
PLW1 46.98899841 W

==== CHANNEL f2 =====  
SFO2 400.1316005 MHz  
NUC2 1H  
CPDPRG[2] waltz16  
PCPD2 90.00 usec  
PLW2 11.99499989 W  
PLW12 0.34213999 W  
PLW13 0.27713001 W

F2 - Processing parameters  
SI 32768  
SF 100.6127732 MHz  
WDW EM  
SSB 0  
LB 1.00 Hz  
GB 0  
PC 1.40



7.945  
7.927  
7.924  
7.494  
7.476  
7.457  
7.392  
7.373  
7.354  
7.338  
7.330  
7.325  
7.313  
7.308  
7.301  
7.260  
6.901  
6.879  
4.870  
4.849  
4.513  
4.493  
3.941  
3.911  
3.789  
3.732  
3.702

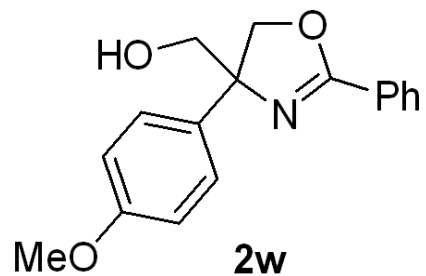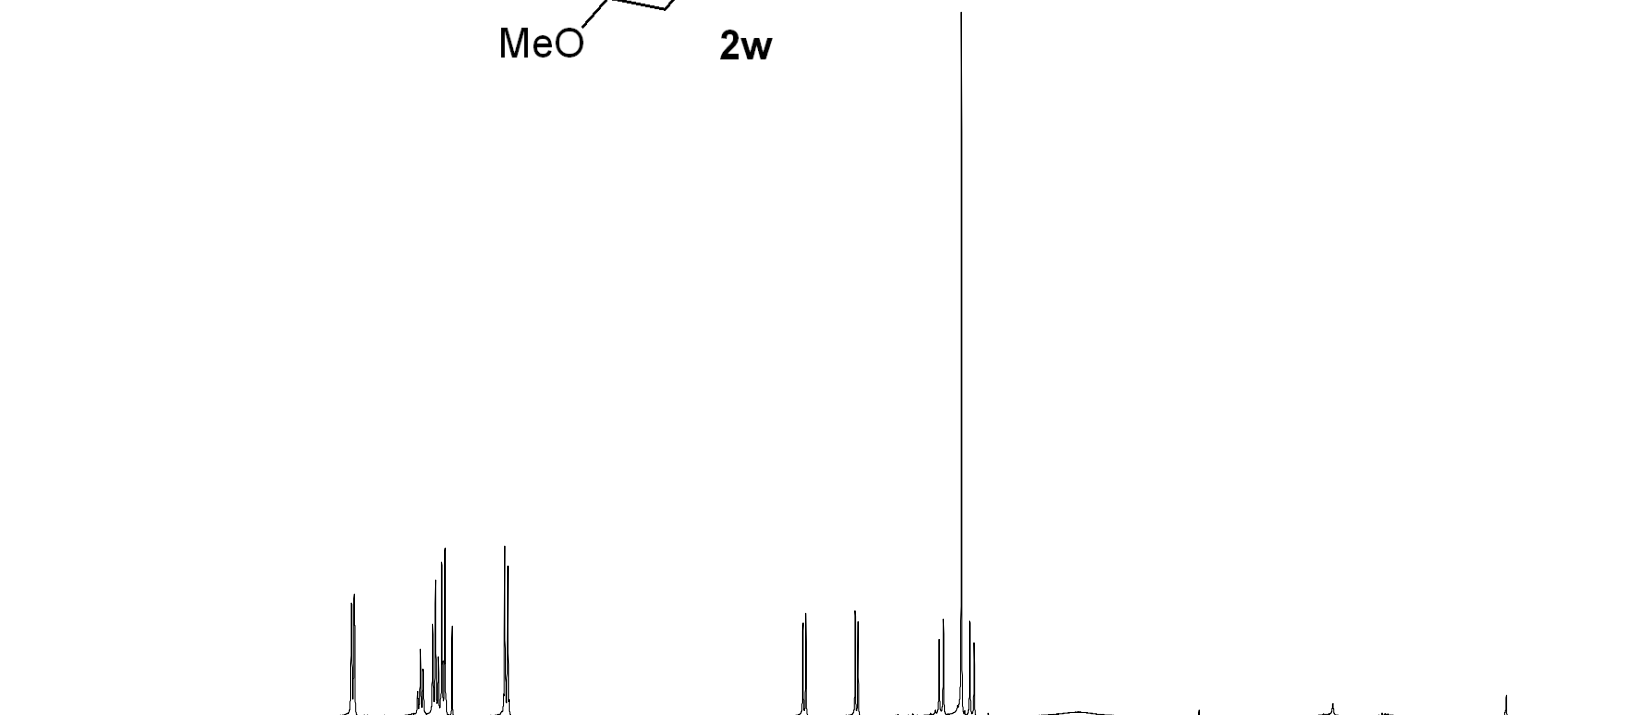

Current Data Parameters  
NAME czl-1-188-C H  
EXPNO 1  
PROCNO 1

F2 - Acquisition Parameters  
Date\_ 20170805  
Time 16.24  
INSTRUM spect  
PROBHD 5 mm PABBO BB/  
PULPROG zg30  
TD 65536  
SOLVENT CDC13  
NS 4  
DS 2  
SWH 8012.820 Hz  
FIDRES 0.122266 Hz  
AQ 4.0894465 sec  
RG 187.77  
DW 62.400 usec  
DE 6.50 usec  
TE 296.1 K  
D1 1.00000000 sec  
TD0 1

==== CHANNEL f1 =====  
SFO1 400.1324710 MHz  
NUC1 1H  
P1 14.50 usec  
PLW1 11.99499989 W

F2 - Processing parameters  
SI 65536  
SF 400.1300102 MHz  
WDW EM  
SSB 0  
LB 0.30 Hz  
GB 0  
PC 1.00

10 9 8 7 6 5 4 3 2 1 0 ppm

2.00  
1.09  
2.08  
2.01  
2.02  
1.03  
1.03  
1.10  
3.14  
0.97

S-164



—164.973  
—158.836  
135.702  
131.646  
128.506  
128.284  
127.035  
126.800  
—113.980  
77.475  
77.319  
77.001  
76.684  
75.468  
68.828  
—55.258

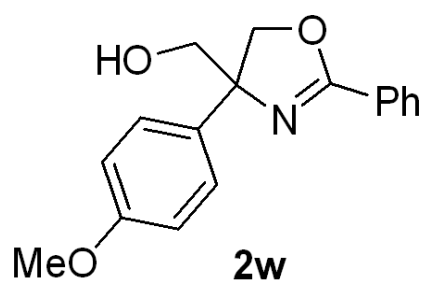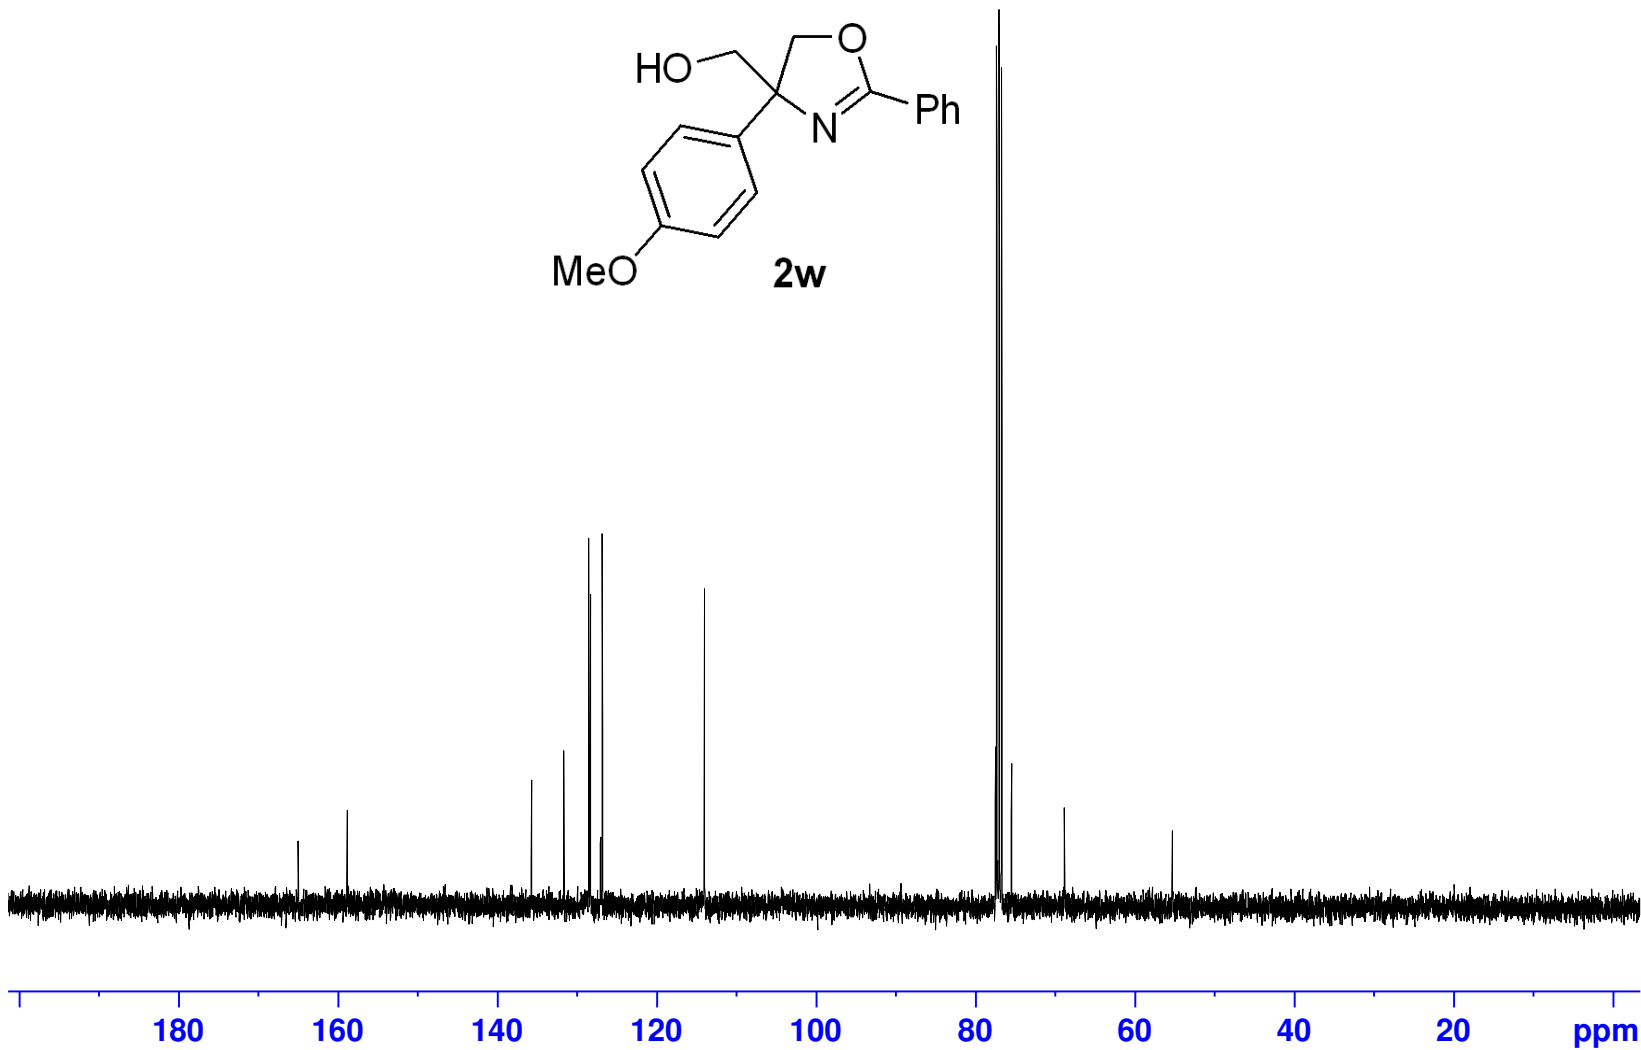

Current Data Parameters  
NAME czl-1-188C- C  
EXPNO 1  
PROCNO 1

F2 - Acquisition Parameters  
Date\_ 20170805  
Time 10.34  
INSTRUM spect  
PROBHD 5 mm PABBO BB/  
PULPROG zgpg30  
TD 65536  
SOLVENT CDC13  
NS 51  
DS 2  
SWH 24038.461 Hz  
FIDRES 0.366798 Hz  
AQ 1.3631488 sec  
RG 196.92  
DW 20.800 usec  
DE 6.50 usec  
TE 297.4 K  
D1 2.00000000 sec  
D11 0.03000000 sec  
TD0 1

==== CHANNEL f1 =====  
SFO1 100.6228298 MHz  
NUC1 13C  
P1 9.70 usec  
PLW1 46.98899841 W

==== CHANNEL f2 =====  
SFO2 400.1316005 MHz  
NUC2 1H  
CPDPRG[2] waltz16  
PCPD2 90.00 usec  
PLW2 11.99499989 W  
PLW12 0.34213999 W  
PLW13 0.27713001 W

F2 - Processing parameters  
SI 32768  
SF 100.6127729 MHz  
WDW EM  
SSB 0  
LB 1.00 Hz  
GB 0  
PC 1.40

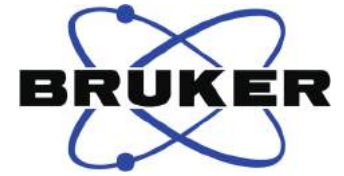

8.022  
8.012  
8.004  
8.000  
7.994  
7.990  
7.537  
7.524  
7.519  
7.503  
7.500  
7.462  
7.458  
7.450  
7.445  
7.438  
7.425  
7.410  
7.406  
7.326  
7.321  
7.313  
7.309  
7.294  
7.286  
7.281  
7.272  
7.260  
4.704  
4.684  
4.638  
4.617  
4.031  
4.003  
3.799  
3.771

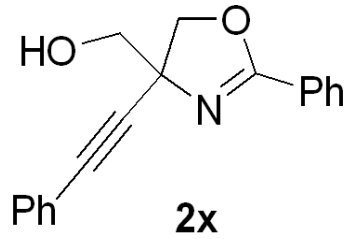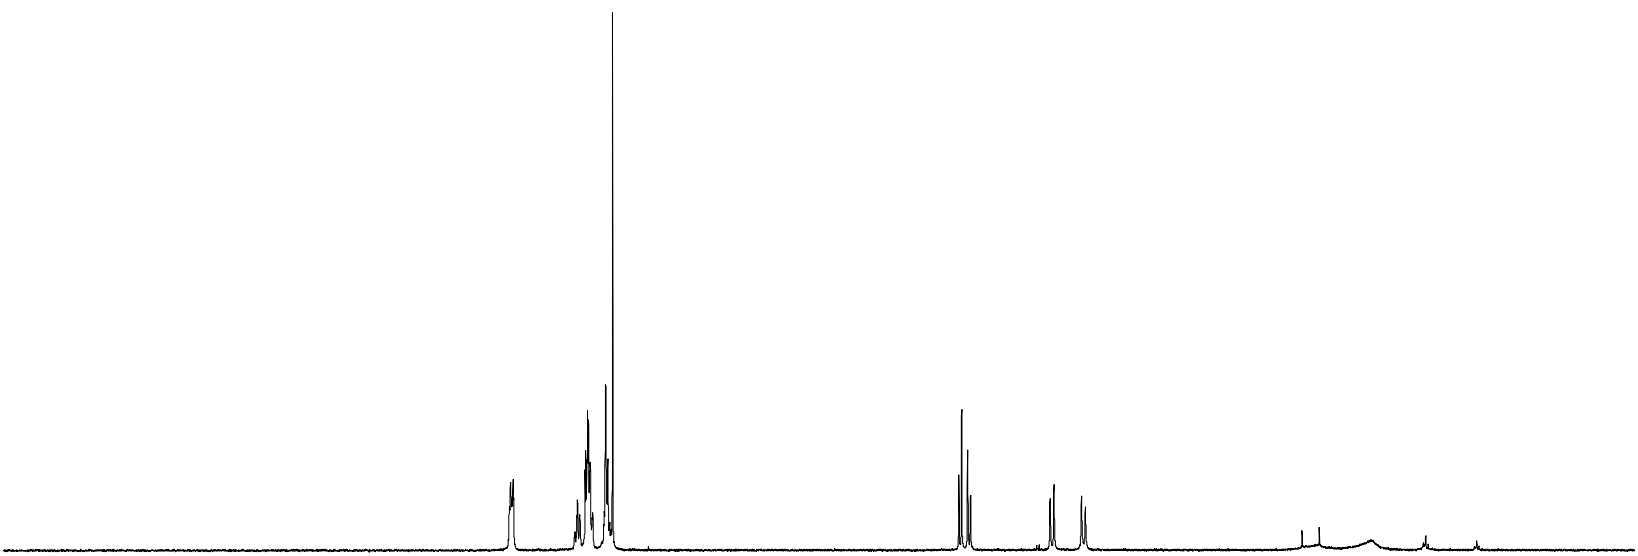

Current Data Parameters  
NAME czl-1-188-D H  
EXPNO 1  
PROCNO 1

F2 - Acquisition Parameters  
Date\_ 20170805  
Time 16.27  
INSTRUM spect  
PROBHD 5 mm PABBO BB/  
PULPROG zg30  
TD 65536  
SOLVENT CDCl3  
NS 4  
DS 2  
SWH 8012.820 Hz  
FIDRES 0.122266 Hz  
AQ 4.0894465 sec  
RG 196.92  
DW 62.400 usec  
DE 6.50 usec  
TE 296.1 K  
D1 1.00000000 sec  
TD0 1

==== CHANNEL f1 =====  
SFO1 400.1324710 MHz  
NUC1 1H  
P1 14.50 usec  
PLW1 11.99499989 W

F2 - Processing parameters  
SI 65536  
SF 400.1300102 MHz  
WDW EM  
SSB 0  
LB 0.30 Hz  
GB 0  
PC 1.00

11 10 9 8 7 6 5 4 3 2 1 ppm

2.04  
1.07  
4.03  
3.00  
1.05  
1.09  
1.04  
1.07

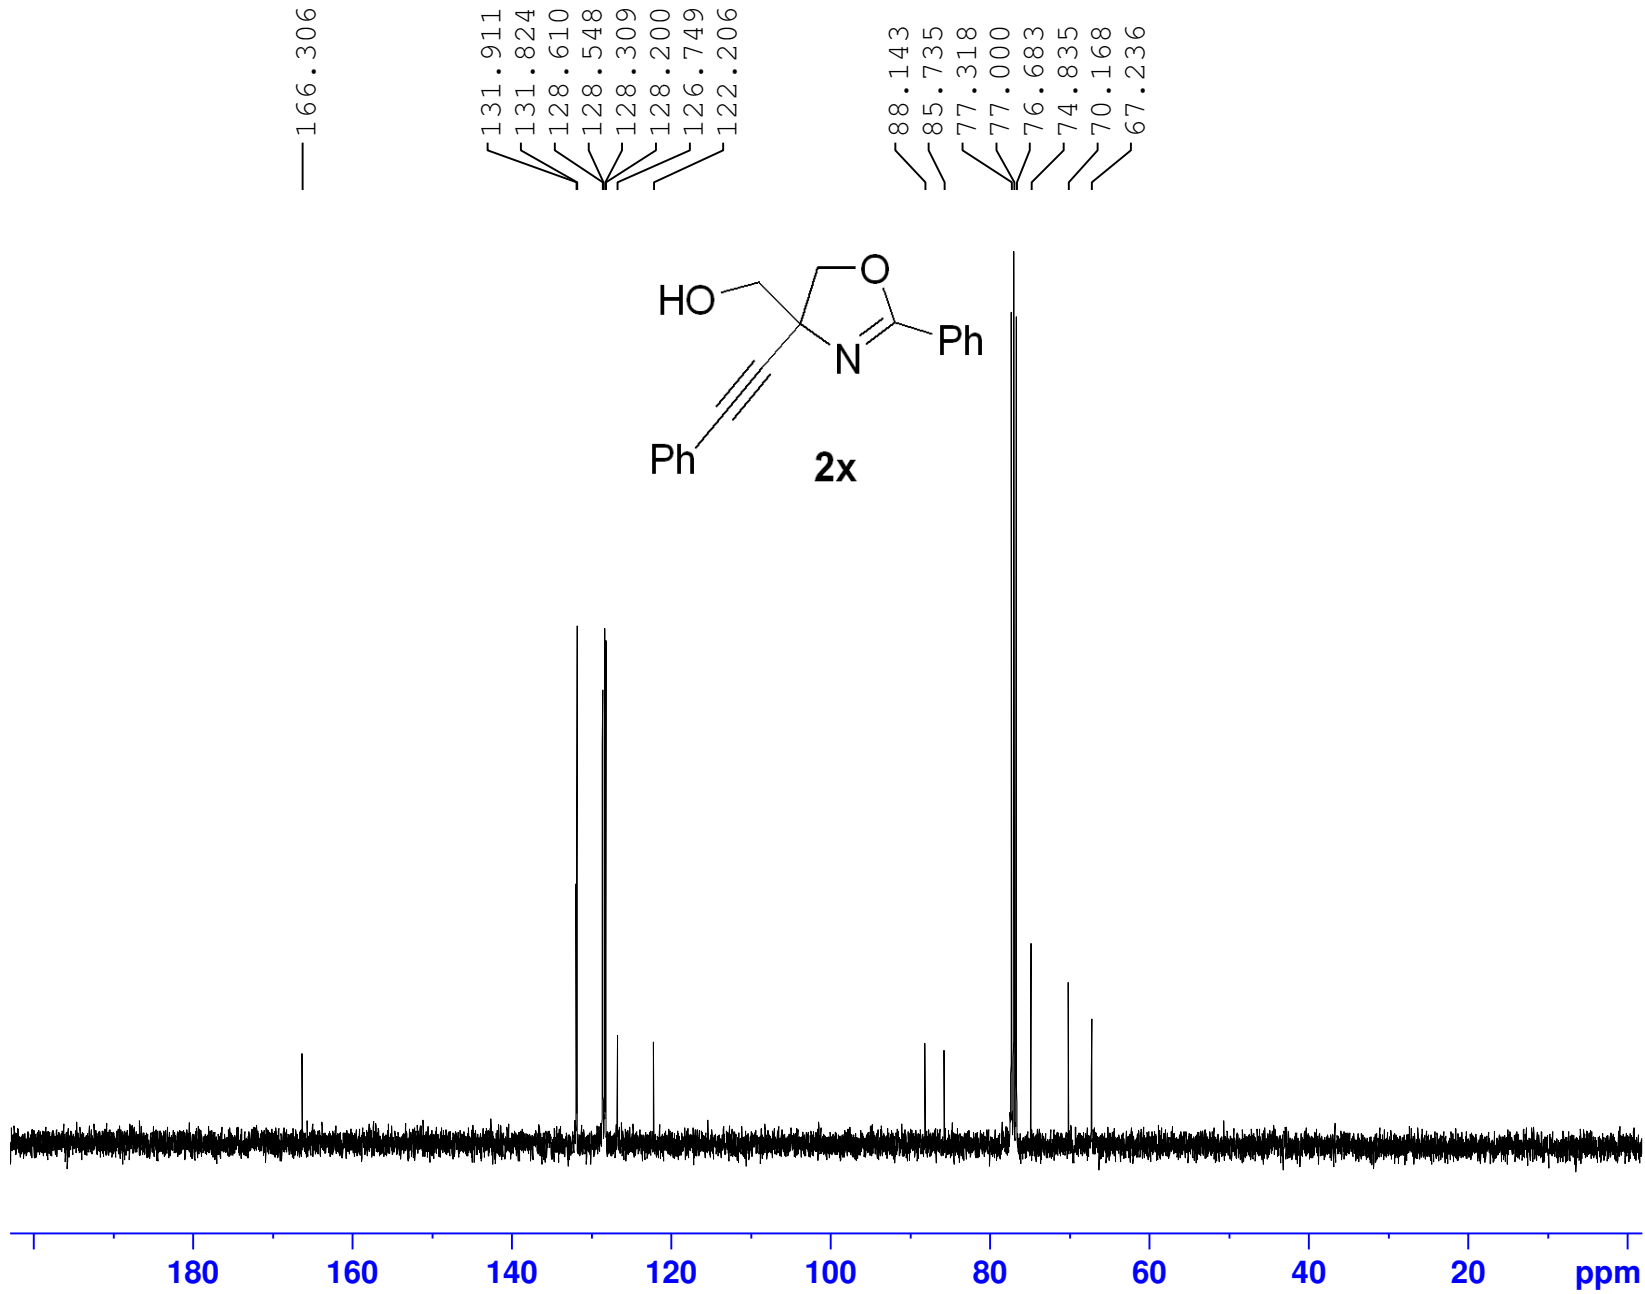

Current Data Parameters  
NAME czl-1-188D C  
EXPNO 1  
PROCNO 1

F2 - Acquisition Parameters  
Date\_ 20170805  
Time 10.29  
INSTRUM spect  
PROBHD 5 mm PABBO BB/  
PULPROG zgpg30  
TD 65536  
SOLVENT CDC13  
NS 50  
DS 2  
SWH 24038.461 Hz  
FIDRES 0.366798 Hz  
AQ 1.3631488 sec  
RG 196.92  
DW 20.800 usec  
DE 6.50 usec  
TE 297.4 K  
D1 2.00000000 sec  
D11 0.03000000 sec  
TD0 1

==== CHANNEL f1 =====  
SFO1 100.6228298 MHz  
NUC1 13C  
P1 9.70 usec  
PLW1 46.98899841 W

==== CHANNEL f2 =====  
SFO2 400.1316005 MHz  
NUC2 1H  
CPDPRG[2] waltz16  
PCPD2 90.00 usec  
PLW2 11.99499989 W  
PLW12 0.34213999 W  
PLW13 0.27713001 W

F2 - Processing parameters  
SI 32768  
SF 100.6127743 MHz  
WDW EM  
SSB 0  
LB 1.00 Hz  
GB 0  
PC 1.40



7.833  
7.817  
7.815  
7.460  
7.441  
7.423  
7.353  
7.334  
7.316  
7.260

4.507  
4.485  
4.473  
4.451  
4.128  
4.110  
4.092  
4.075  
3.831  
3.803  
3.665  
3.636  
2.828  
2.789  
2.682  
2.643

1.216  
1.198  
1.181

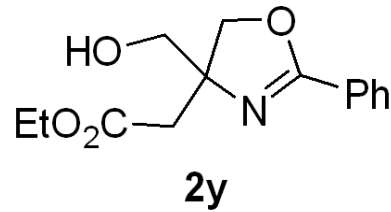

Current Data Parameters  
NAME czl-1-188-E H  
EXPNO 1  
PROCNO 1

F2 - Acquisition Parameters  
Date\_ 20170805  
Time 16.31  
INSTRUM spect  
PROBHD 5 mm PABBO BB/  
PULPROG zg30  
TD 65536  
SOLVENT CDC13  
NS 4  
DS 2  
SWH 8012.820 Hz  
FIDRES 0.122266 Hz  
AQ 4.0894465 sec  
RG 187.77  
DW 62.400 usec  
DE 6.50 usec  
TE 296.1 K  
D1 1.00000000 sec  
TD0 1

==== CHANNEL f1 =====  
SFO1 400.1324710 MHz  
NUC1 1H  
P1 14.50 usec  
PLW1 11.99499989 W

F2 - Processing parameters  
SI 65536  
SF 400.1300103 MHz  
WDW EM  
SSB 0  
LB 0.30 Hz  
GB 0  
PC 1.00

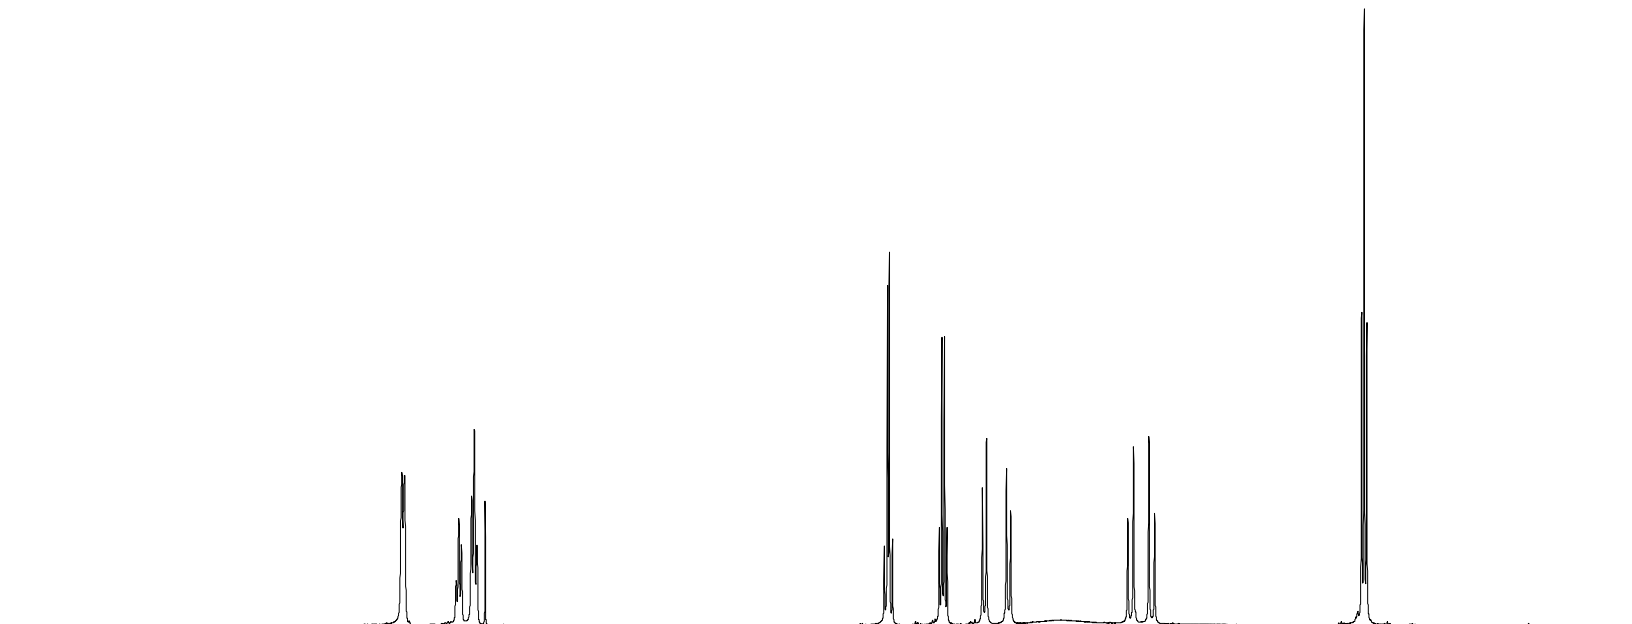

10 9 8 7 6 5 4 3 2 1 0 ppm

2.03  
1.05  
2.00

2.01  
2.02  
1.06  
1.07  
S-168

1.08  
1.06

3.08



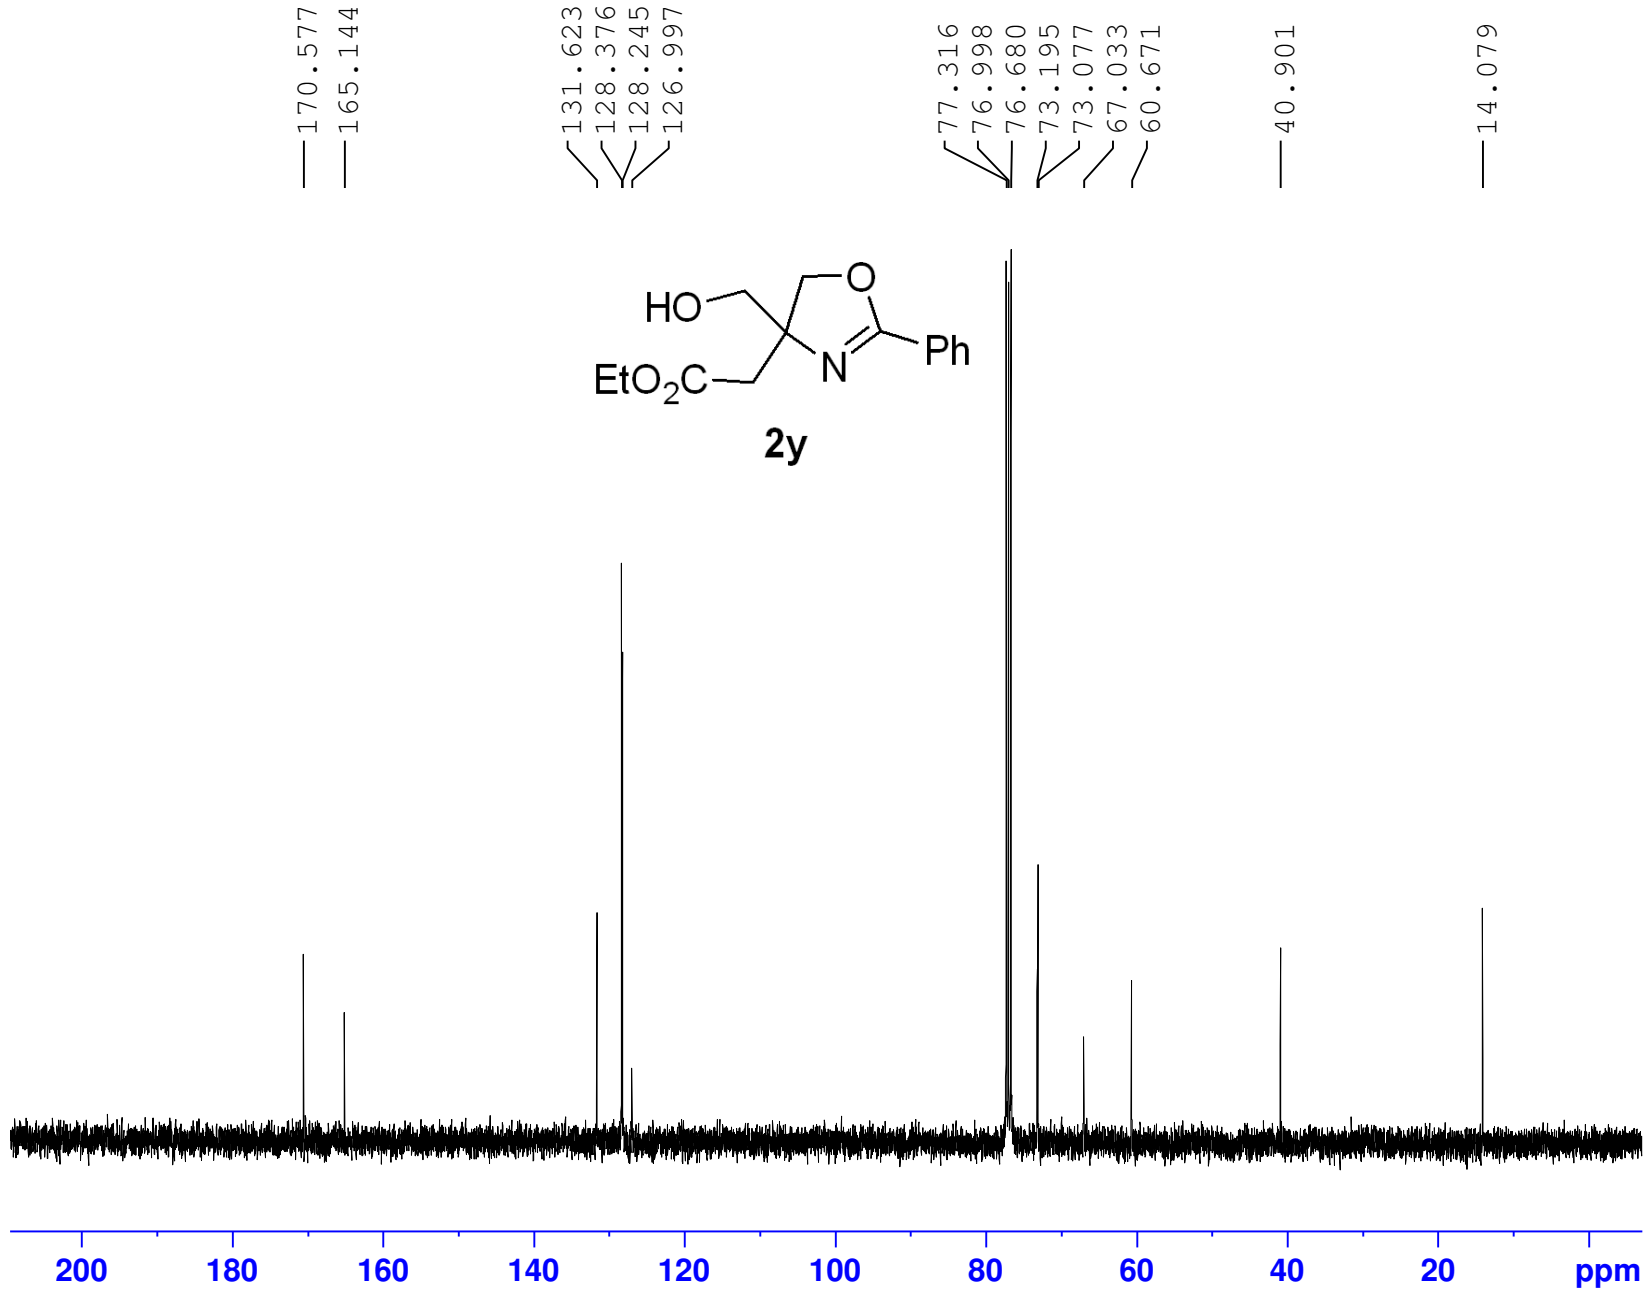

Current Data Parameters  
NAME czl-1-188E C  
EXPNO 1  
PROCNO 1

F2 - Acquisition Parameters  
Date\_ 20170805  
Time 10.16  
INSTRUM spect  
PROBHD 5 mm PABBO BB/  
PULPROG zgpg30  
TD 65536  
SOLVENT CDC13  
NS 60  
DS 2  
SWH 24038.461 Hz  
FIDRES 0.366798 Hz  
AQ 1.3631488 sec  
RG 196.92  
DW 20.800 usec  
DE 6.50 usec  
TE 297.5 K  
D1 2.00000000 sec  
D11 0.03000000 sec  
TD0 1

==== CHANNEL f1 =====  
SFO1 100.6228298 MHz  
NUC1 13C  
P1 9.70 usec  
PLW1 46.98899841 W

==== CHANNEL f2 =====  
SFO2 400.1316005 MHz  
NUC2 1H  
CPDPRG[2] waltz16  
PCPD2 90.00 usec  
PLW2 11.99499989 W  
PLW12 0.34213999 W  
PLW13 0.27713001 W

F2 - Processing parameters  
SI 32768  
SF 100.6127735 MHz  
WDW EM  
SSB 0  
LB 1.00 Hz  
GB 0  
PC 1.40



8.018  
8.000  
7.896  
7.560  
7.542  
7.433  
7.414  
7.399  
7.385  
7.382  
7.367  
7.260  
7.078  
7.067  
7.062  
7.033  
4.953  
4.936  
4.919  
4.904  
4.800  
4.783  
4.765  
4.713  
4.696  
4.679  
4.359  
4.343  
4.327  
3.995  
3.979  
3.963

— 1.729

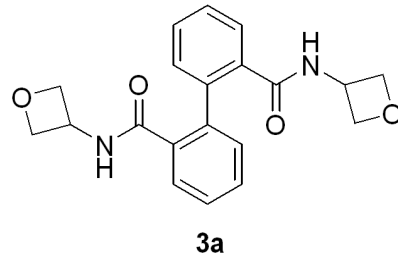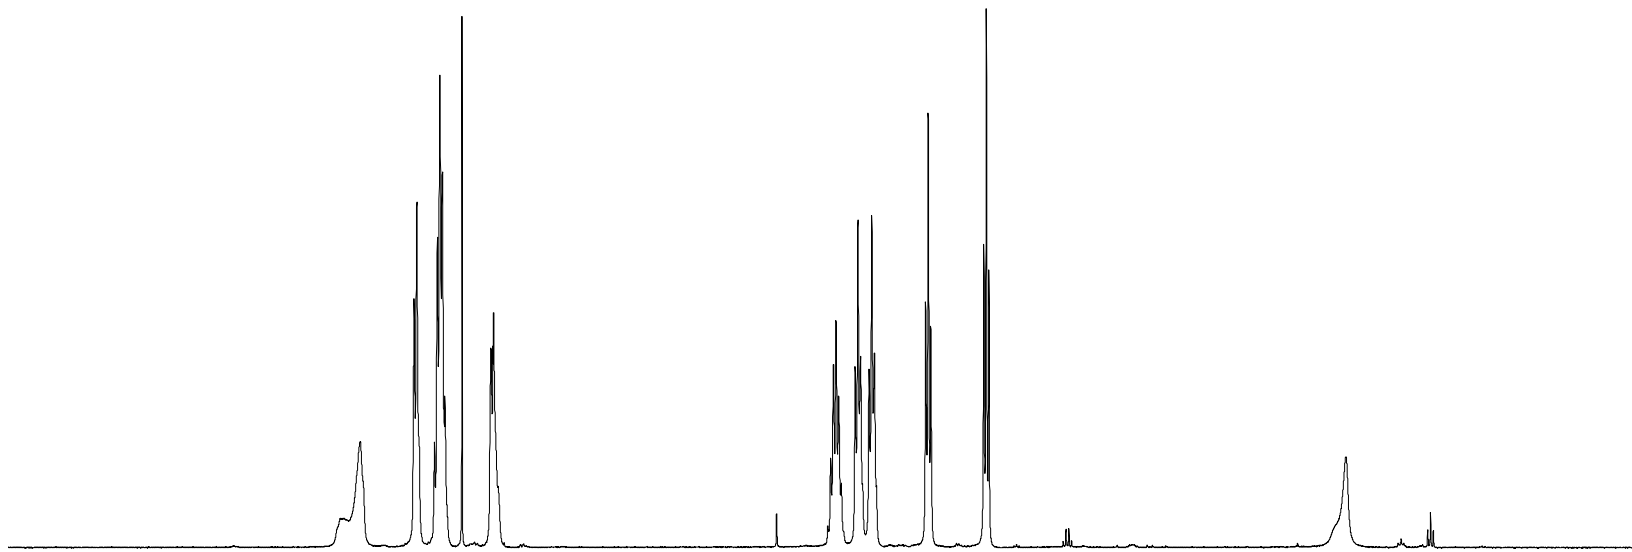

2.01  
2.06  
4.09  
2.02

2.10  
2.04  
2.04  
2.01  
2.00

S-170

Current Data Parameters  
NAME czl-2-5-SM  
EXPNO 1  
PROCNO 1

F2 - Acquisition Parameters  
Date\_ 20170826  
Time 10.11  
INSTRUM spect  
PROBHD 5 mm PABBO BB/  
PULPROG zg30  
TD 65536  
SOLVENT CDCl3  
NS 4  
DS 2  
SWH 8012.820 Hz  
FIDRES 0.122266 Hz  
AQ 4.0894465 sec  
RG 112.31  
DW 62.400 usec  
DE 6.50 usec  
TE 297.2 K  
D1 1.00000000 sec  
TD0 1

==== CHANNEL f1 =====  
SF01 400.1324710 MHz  
NUC1 1H  
P1 14.50 usec  
PLW1 11.99499989 W

F2 - Processing parameters  
SI 65536  
SF 400.1300102 MHz  
WDW EM  
SSB 0  
LB 0.30 Hz  
GB 0  
PC 1.00

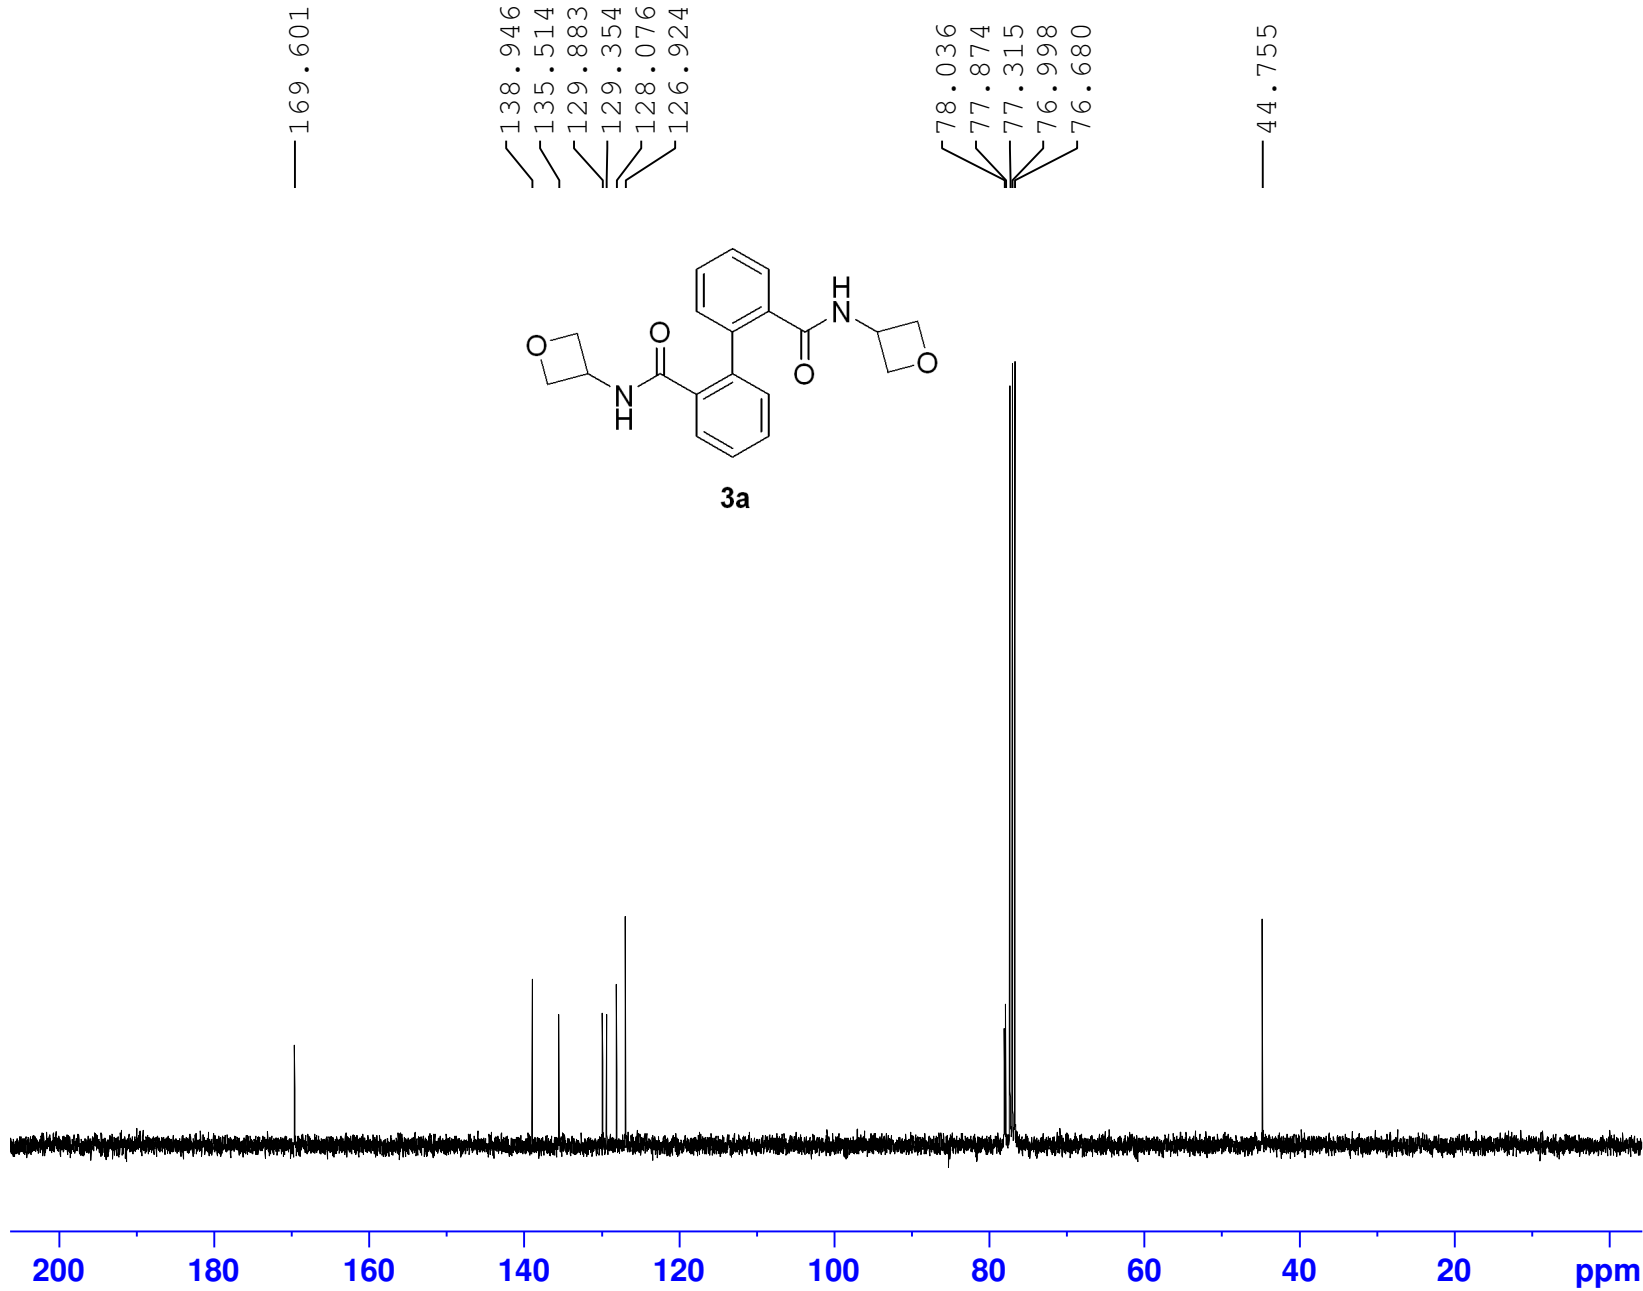

Current Data Parameters  
NAME czl-2-5-SM  
EXPNO 2  
PROCNO 1

F2 - Acquisition Parameters  
Date\_ 20170826  
Time 10.20  
INSTRUM spect  
PROBHD 5 mm PABBO BB/  
PULPROG zgpg30  
TD 65536  
SOLVENT CDC13  
NS 107  
DS 2  
SWH 24038.461 Hz  
FIDRES 0.366798 Hz  
AQ 1.3631488 sec  
RG 196.92  
DW 20.800 usec  
DE 6.50 usec  
TE 297.5 K  
D1 2.00000000 sec  
D11 0.03000000 sec  
TD0 1

==== CHANNEL f1 =====  
SFO1 100.6228298 MHz  
NUC1 13C  
P1 9.70 usec  
PLW1 46.98899841 W

==== CHANNEL f2 =====  
SFO2 400.1316005 MHz  
NUC2 1H  
CPDPRG[2] waltz16  
PCPD2 90.00 usec  
PLW2 11.99499989 W  
PLW12 0.34213999 W  
PLW13 0.27713001 W

F2 - Processing parameters  
SI 32768  
SF 100.6127737 MHz  
WDW EM  
SSB 0  
LB 1.00 Hz  
GB 0  
PC 1.40



Current Data Parameters  
NAME hh-3-410b-h-fr1  
EXPNO 2  
PROCNO 1

F2 - Acquisition Parameters  
Date\_ 20190411  
Time 13.31  
INSTRUM spect  
PROBHD 5 mm PABBO BB/  
PULPROG zg30  
TD 65536  
SOLVENT CDC13  
NS 4  
DS 0  
SWH 8012.820 Hz  
FIDRES 0.122266 Hz  
AQ 4.0894465 sec  
RG 142.88  
DW 62.400 usec  
DE 6.50 usec  
TE 297.9 K  
D1 1.00000000 sec  
TD0 1

==== CHANNEL f1 =====  
SFO1 400.1324710 MHz  
NUC1 1H  
P1 14.50 usec  
PLW1 11.99499989 W

F2 - Processing parameters  
SI 65536  
SF 400.1300106 MHz  
WDW EM  
SSB 0  
LB 0.30 Hz  
GB 0  
PC 1.00

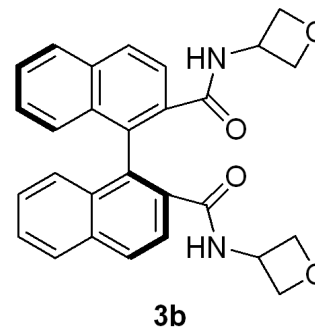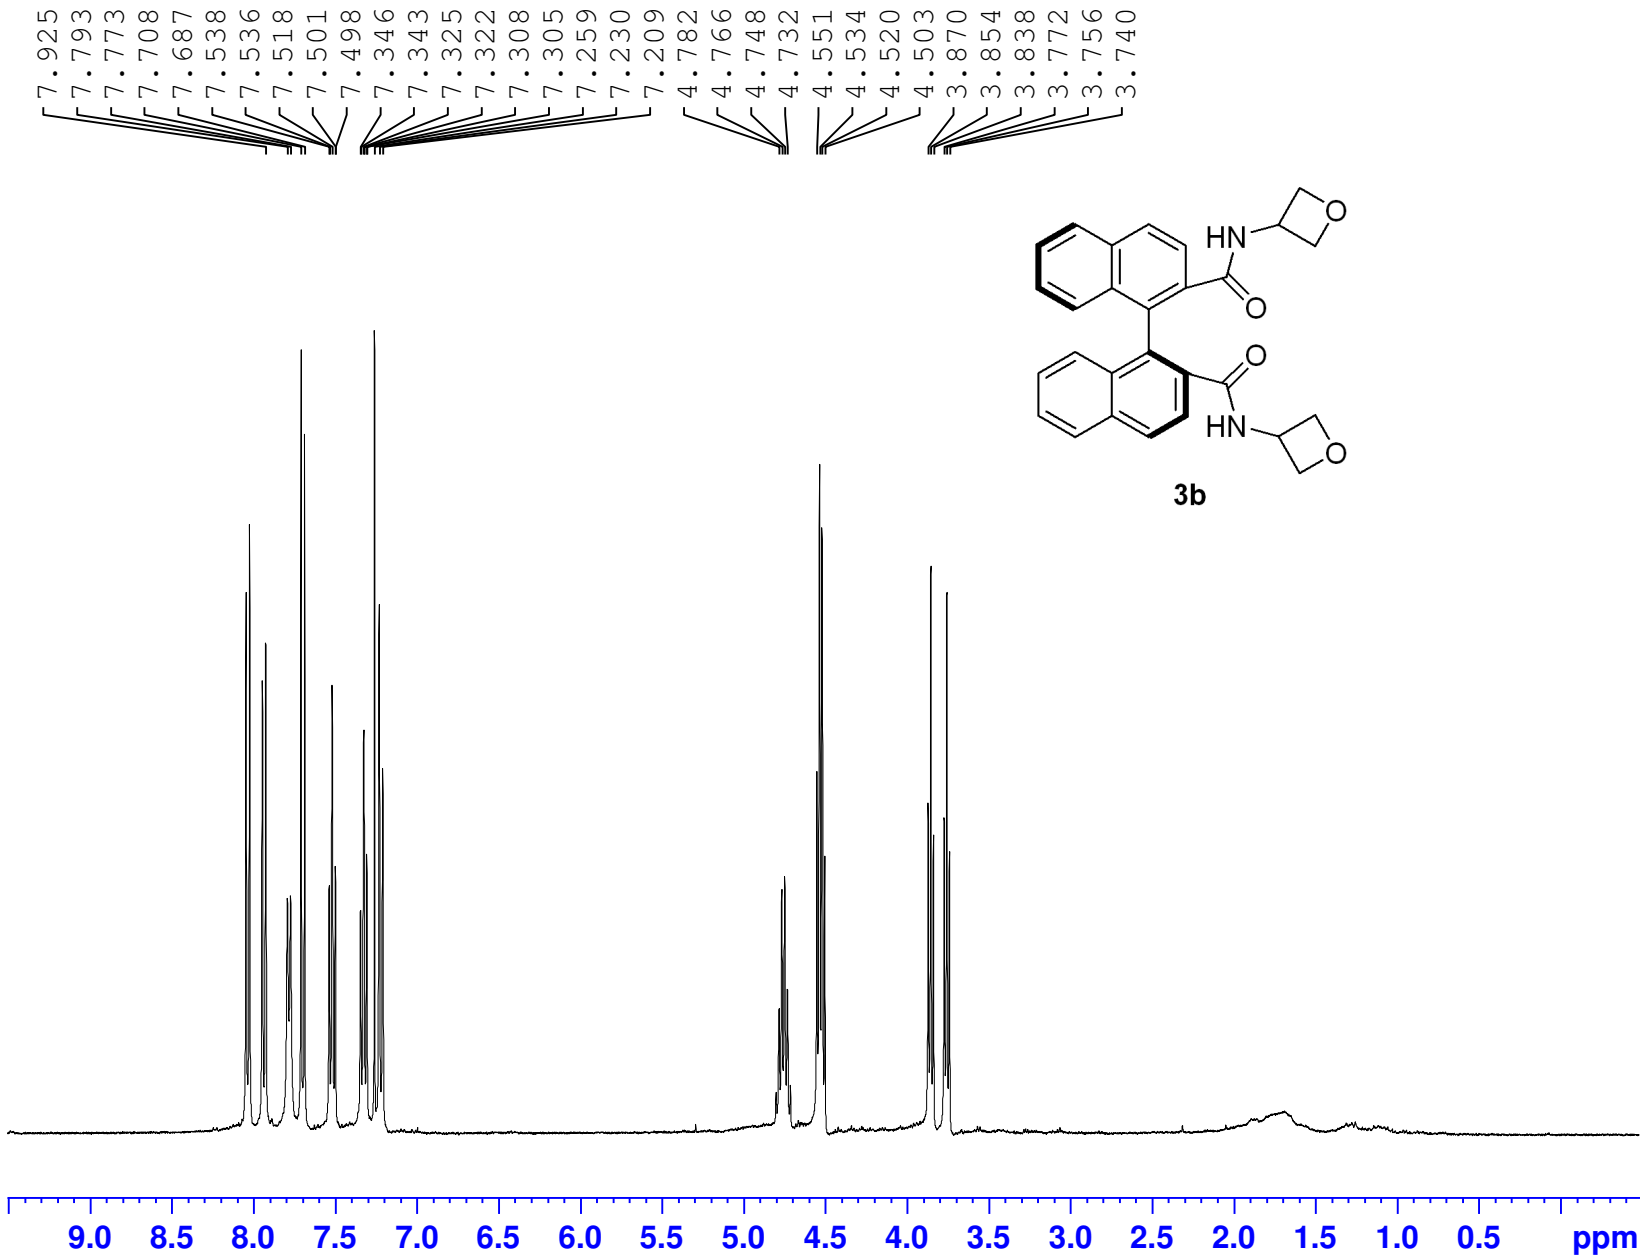

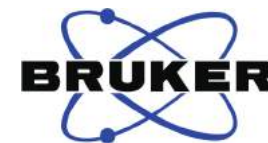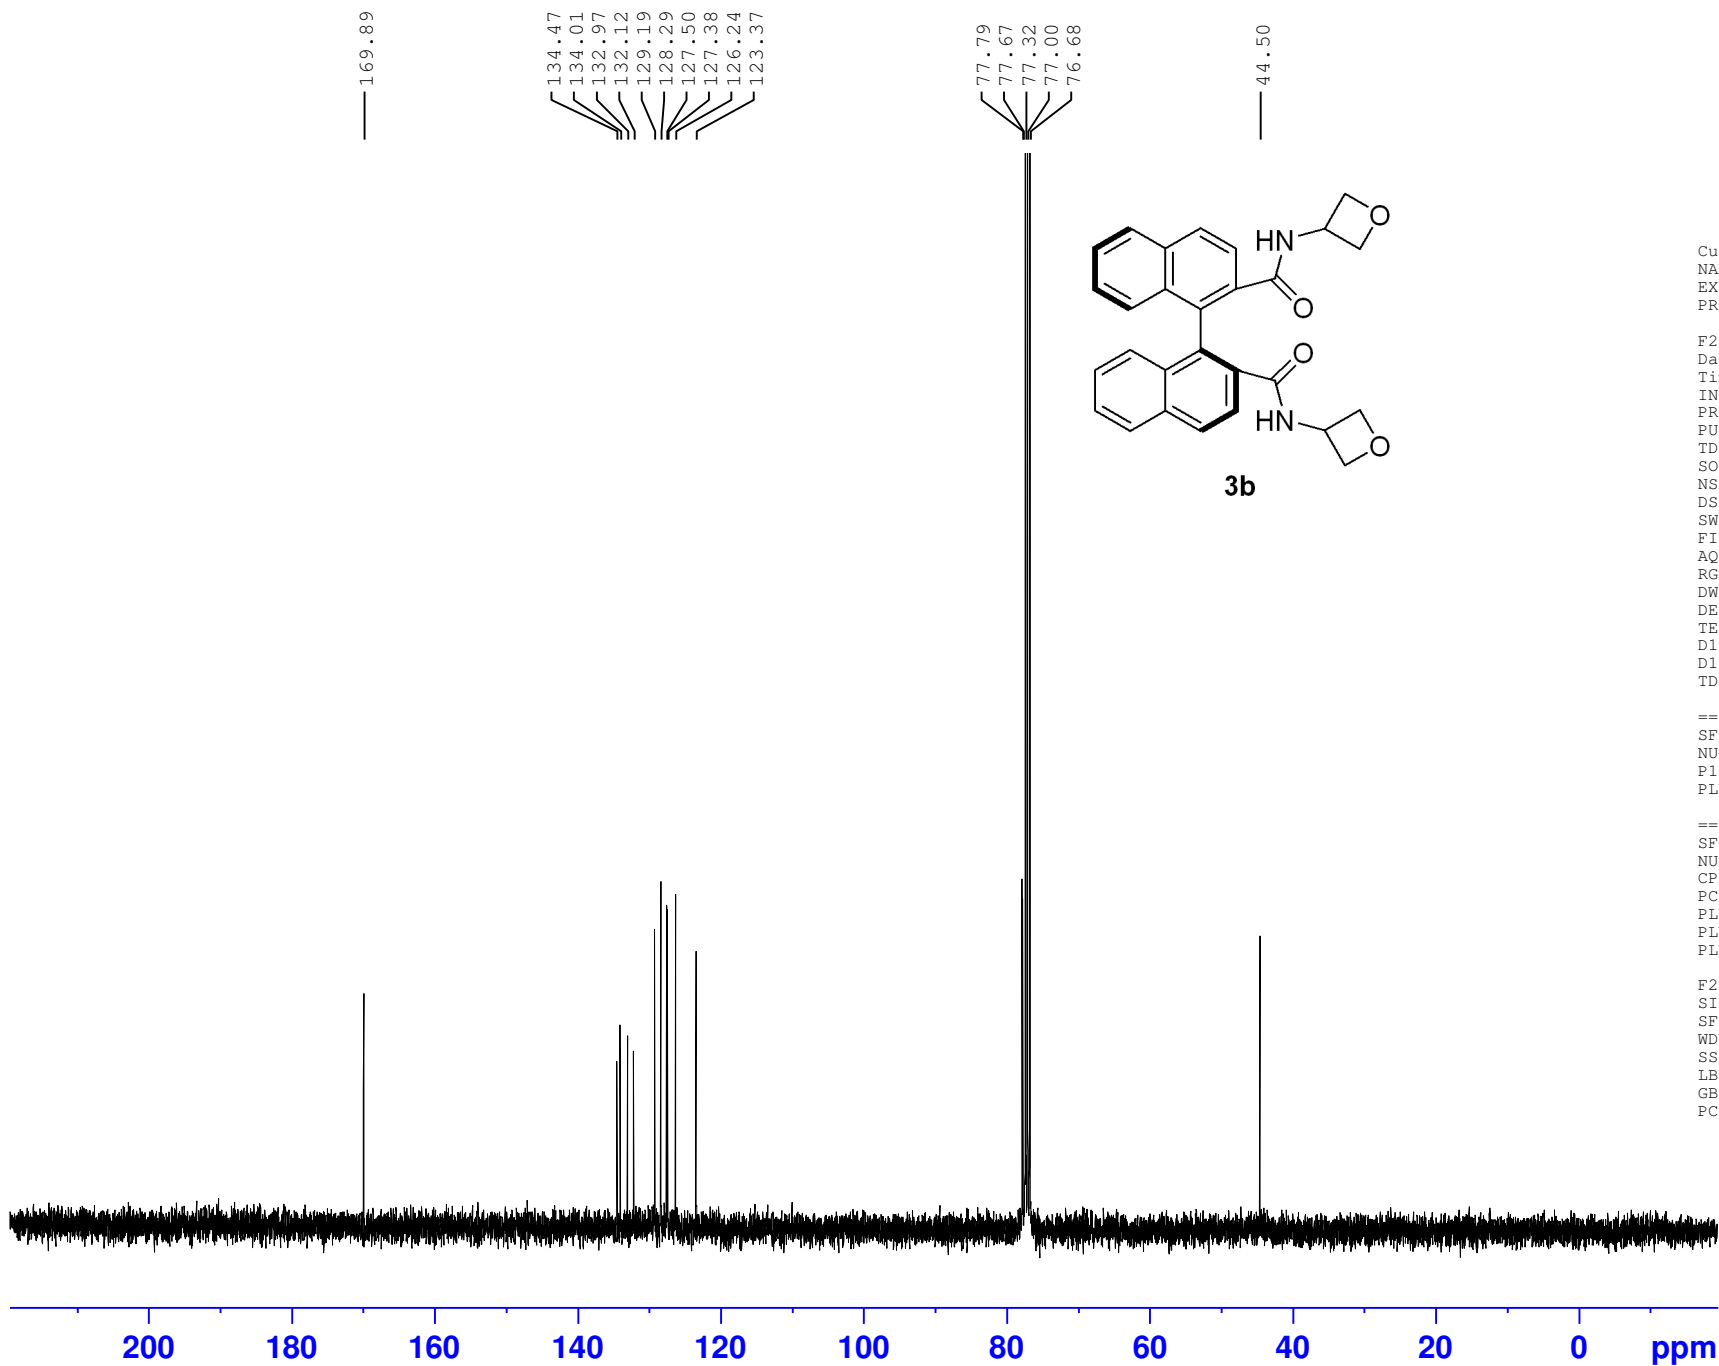

Current Data Parameters  
NAME hh-3-410c-c-fr1  
EXPNO 1  
PROCNO 1

F2 - Acquisition Parameters  
Date\_ 20190411  
Time 10.13  
INSTRUM spect  
PROBHD 5 mm PABBO BB/  
PULPROG zgpg30  
TD 65536  
SOLVENT CDCl3  
NS 135  
DS 0  
SWH 24038.461 Hz  
FIDRES 0.366798 Hz  
AQ 1.3631488 sec  
RG 196.92  
DW 20.800 usec  
DE 6.50 usec  
TE 299.4 K  
D1 2.0000000 sec  
D11 0.03000000 sec  
TD0 1

==== CHANNEL f1 =====  
SFO1 100.6228298 MHz  
NUC1 13C  
P1 9.70 usec  
PLW1 46.98899841 W

==== CHANNEL f2 =====  
SFO2 400.1316005 MHz  
NUC2 1H  
CPDPRG[2] waltz16  
PCPD2 90.00 usec  
PLW2 11.99499989 W  
PLW12 0.34213999 W  
PLW13 0.27713001 W

F2 - Processing parameters  
SI 32768  
SF 100.6127729 MHz  
WDW EM  
SSB 0  
LB 1.00 Hz  
GB 0  
PC 1.40



7.260  
7.195  
7.183

4.976  
4.958  
4.941  
4.928  
4.918  
4.902  
4.884  
4.490  
4.474  
4.459

1.471

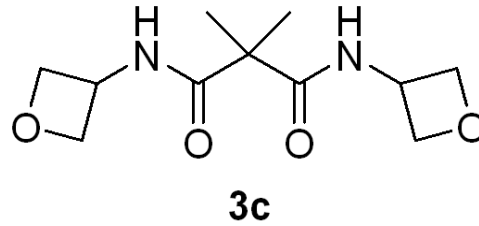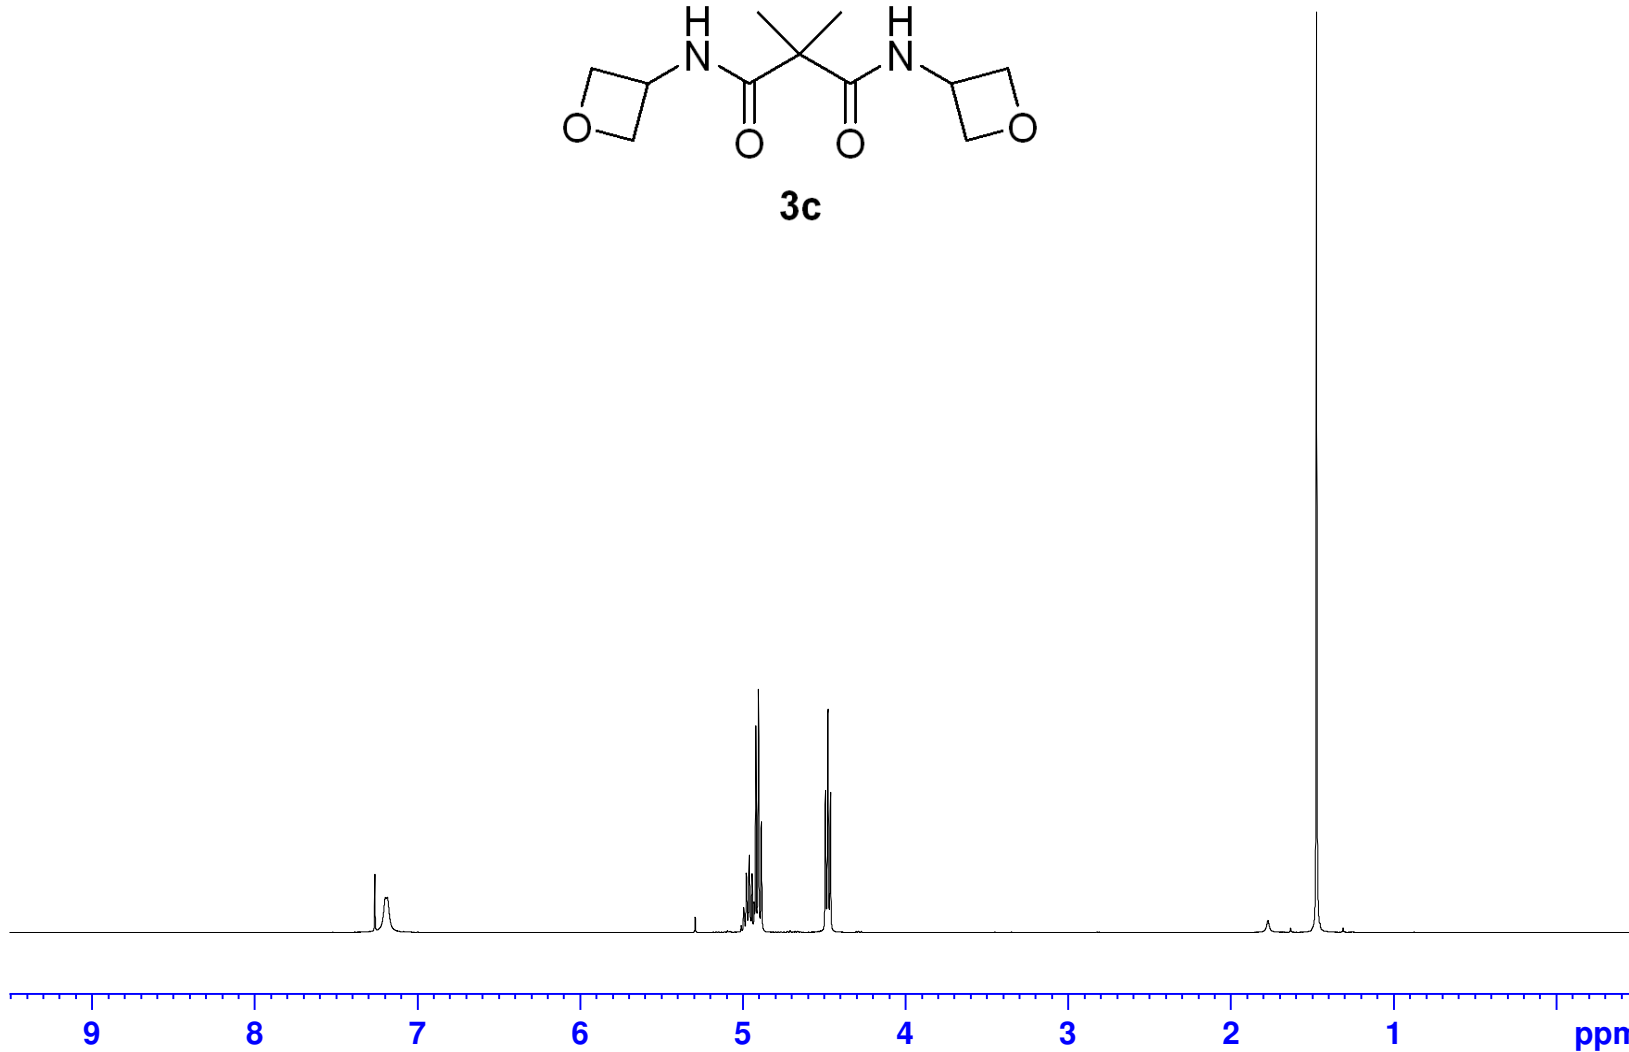

1.87

5.99

4.00

6.02

Current Data Parameters  
NAME hh-3-410a-h-fr1  
EXPNO 1  
PROCNO 1

F2 - Acquisition Parameters  
Date\_ 20190411  
Time 9.57  
INSTRUM spect  
PROBHD 5 mm PABBO BB/  
PULPROG zg30  
TD 65536  
SOLVENT CDC13  
NS 6  
DS 0  
SWH 8012.820 Hz  
FIDRES 0.122266 Hz  
AQ 4.0894465 sec  
RG 112.31  
DW 62.400 usec  
DE 6.50 usec  
TE 298.4 K  
D1 1.00000000 sec  
TD0 1

==== CHANNEL f1 =====  
SFO1 400.1324710 MHz  
NUC1 1H  
P1 14.50 usec  
PLW1 11.99499989 W

F2 - Processing parameters  
SI 65536  
SF 400.1300103 MHz  
WDW EM  
SSB 0  
LB 0.30 Hz  
GB 0  
PC 1.00

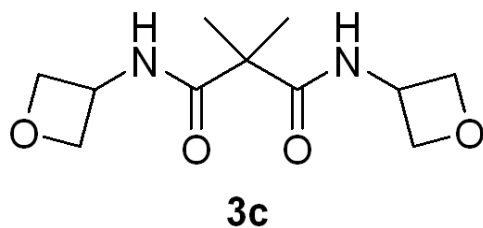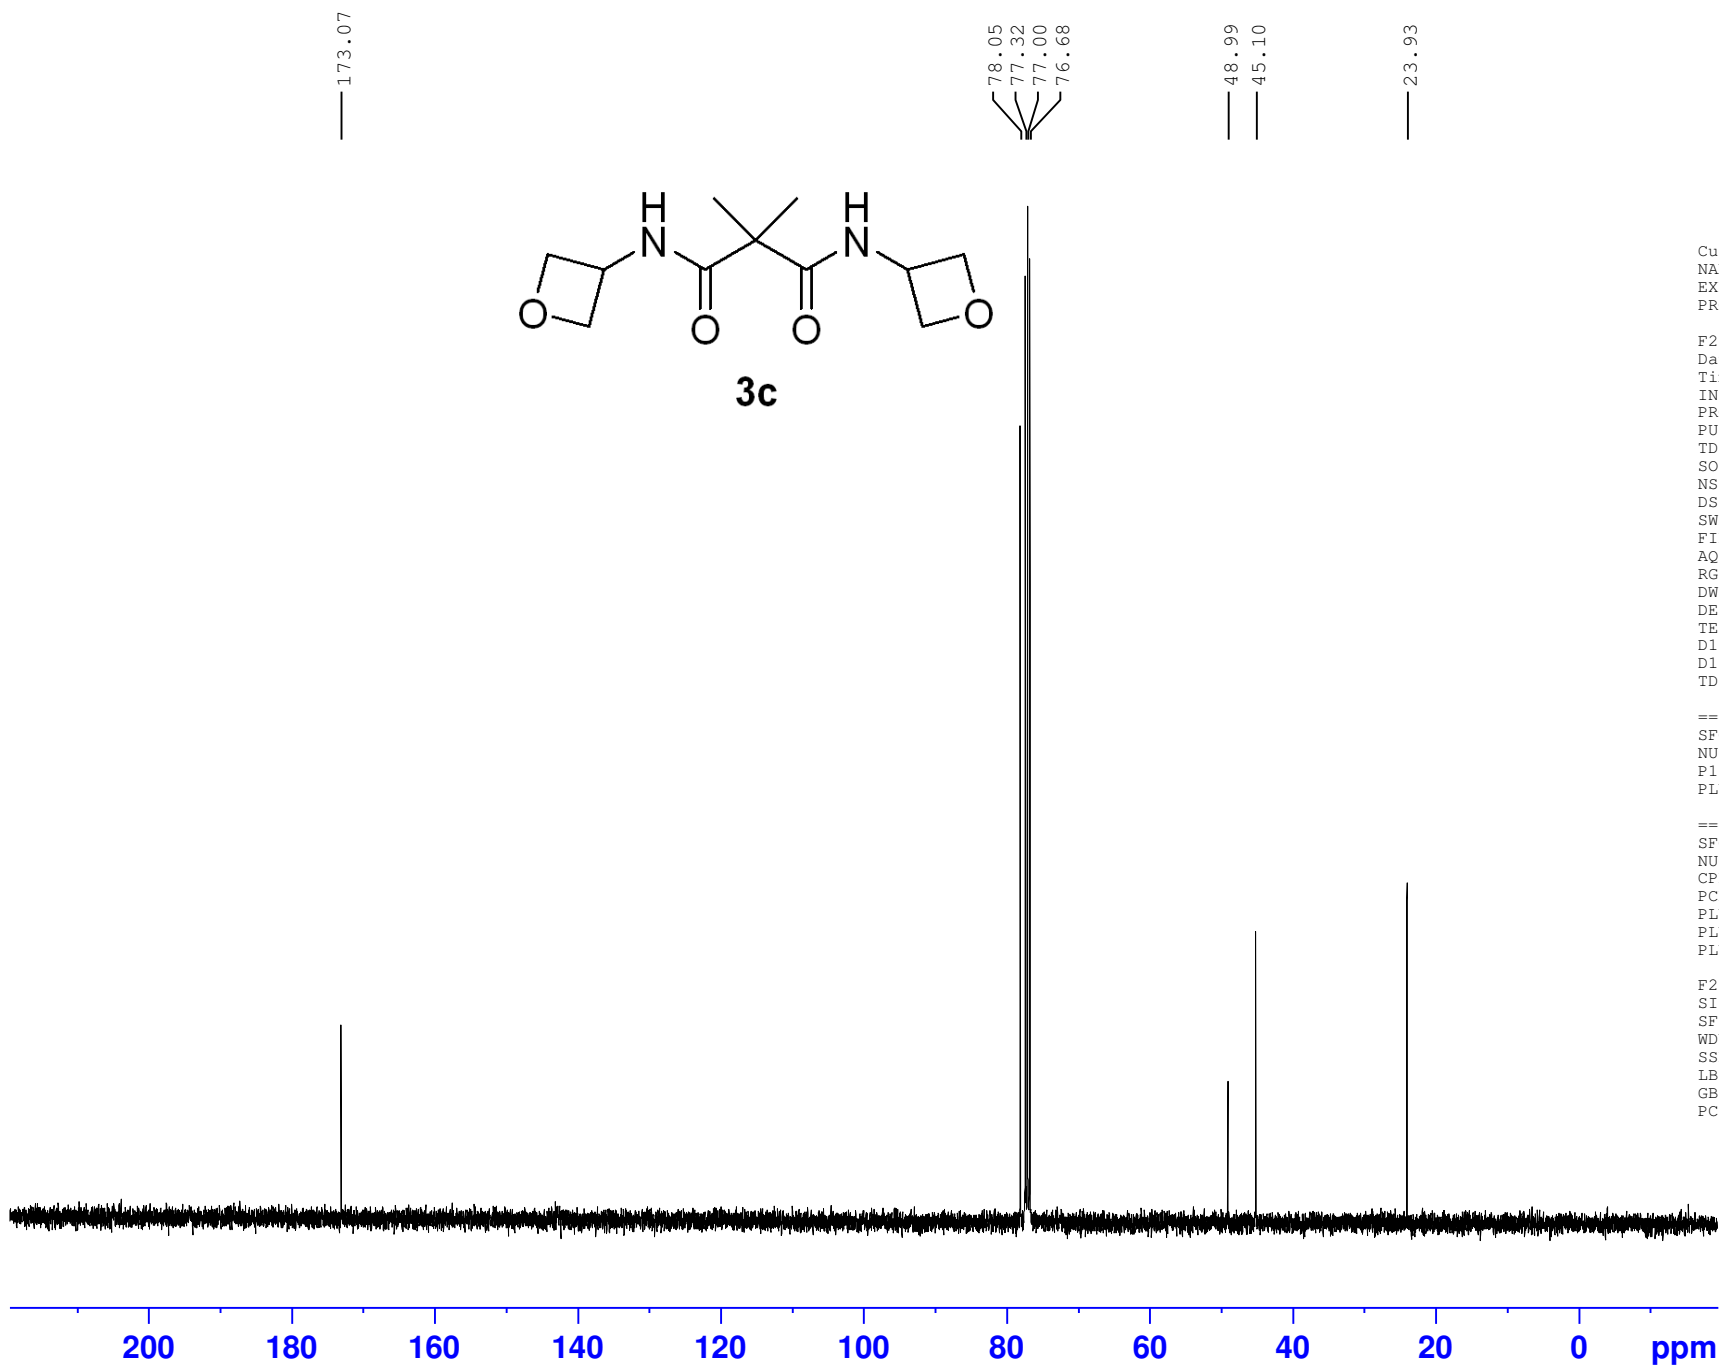

S-175

Current Data Parameters  
NAME hh-3-410a-c-fr1  
EXPNO 1  
PROCNO 1

F2 - Acquisition Parameters  
Date\_ 20190411  
Time 10.01  
INSTRUM spect  
PROBHD 5 mm PABBO BB/  
PULPROG zgpg30  
TD 65536  
SOLVENT CDCl3  
NS 75  
DS 0  
SWH 24038.461 Hz  
FIDRES 0.366798 Hz  
AQ 1.3631488 sec  
RG 196.92  
DW 20.800 usec  
DE 6.50 usec  
TE 299.4 K  
D1 2.0000000 sec  
D11 0.0300000 sec  
TD0 1

==== CHANNEL f1 =====  
SFO1 100.6228298 MHz  
NUC1 13C  
P1 9.70 usec  
PLW1 46.98899841 W

==== CHANNEL f2 =====  
SFO2 400.1316005 MHz  
NUC2 1H  
PCPD2 waltz16  
PLW2 90.00 usec  
PLW12 11.99499989 W  
PLW13 0.34213999 W  
PLW13 0.27713001 W

F2 - Processing parameters  
SI 32768  
SF 100.6127728 MHz  
WDW EM  
SSB 0  
LB 1.00 Hz  
GB 0  
PC 1.40



Current Data Parameters  
NAME 20181025-WJL-1-35 (H)  
EXPNO 1  
PROCNO 1

F2 - Acquisition Parameters  
Date\_ 20181025  
Time 22.39  
INSTRUM spect  
PROBHD 5 mm PABBO BB-  
PULPROG zg30  
TD 65536  
SOLVENT CDCl3  
NS 8  
DS 0  
SWH 8223.685 Hz  
FIDRES 0.125483 Hz  
AQ 3.9845889 sec  
RG 406  
DW 60.800 usec  
DE 6.00 usec  
TE 295.3 K  
D1 1.0000000 sec  
TD0 1

==== CHANNEL f1 =====  
NUC1 1H  
P1 15.80 usec  
PL1 -1.00 dB  
SFO1 400.1324710 MHz

F2 - Processing parameters  
SI 32768  
SF 400.1300095 MHz  
WDW EM  
SSB 0  
LB 0.30 Hz  
GB 0  
PC 1.00

7.30  
7.28  
7.26  
7.25  
7.23  
7.21  
7.10  
7.08

4.68  
4.67  
4.65  
4.58  
4.56  
4.54  
4.53  
4.52  
4.50  
4.48  
4.48  
4.21  
4.19  
4.18  
3.90  
3.89  
3.87  
3.04  
3.01  
2.99  
2.48  
2.45  
2.45  
2.42  
2.40  
2.34  
2.33  
2.32  
2.31  
2.30

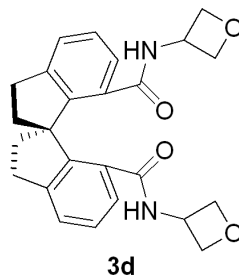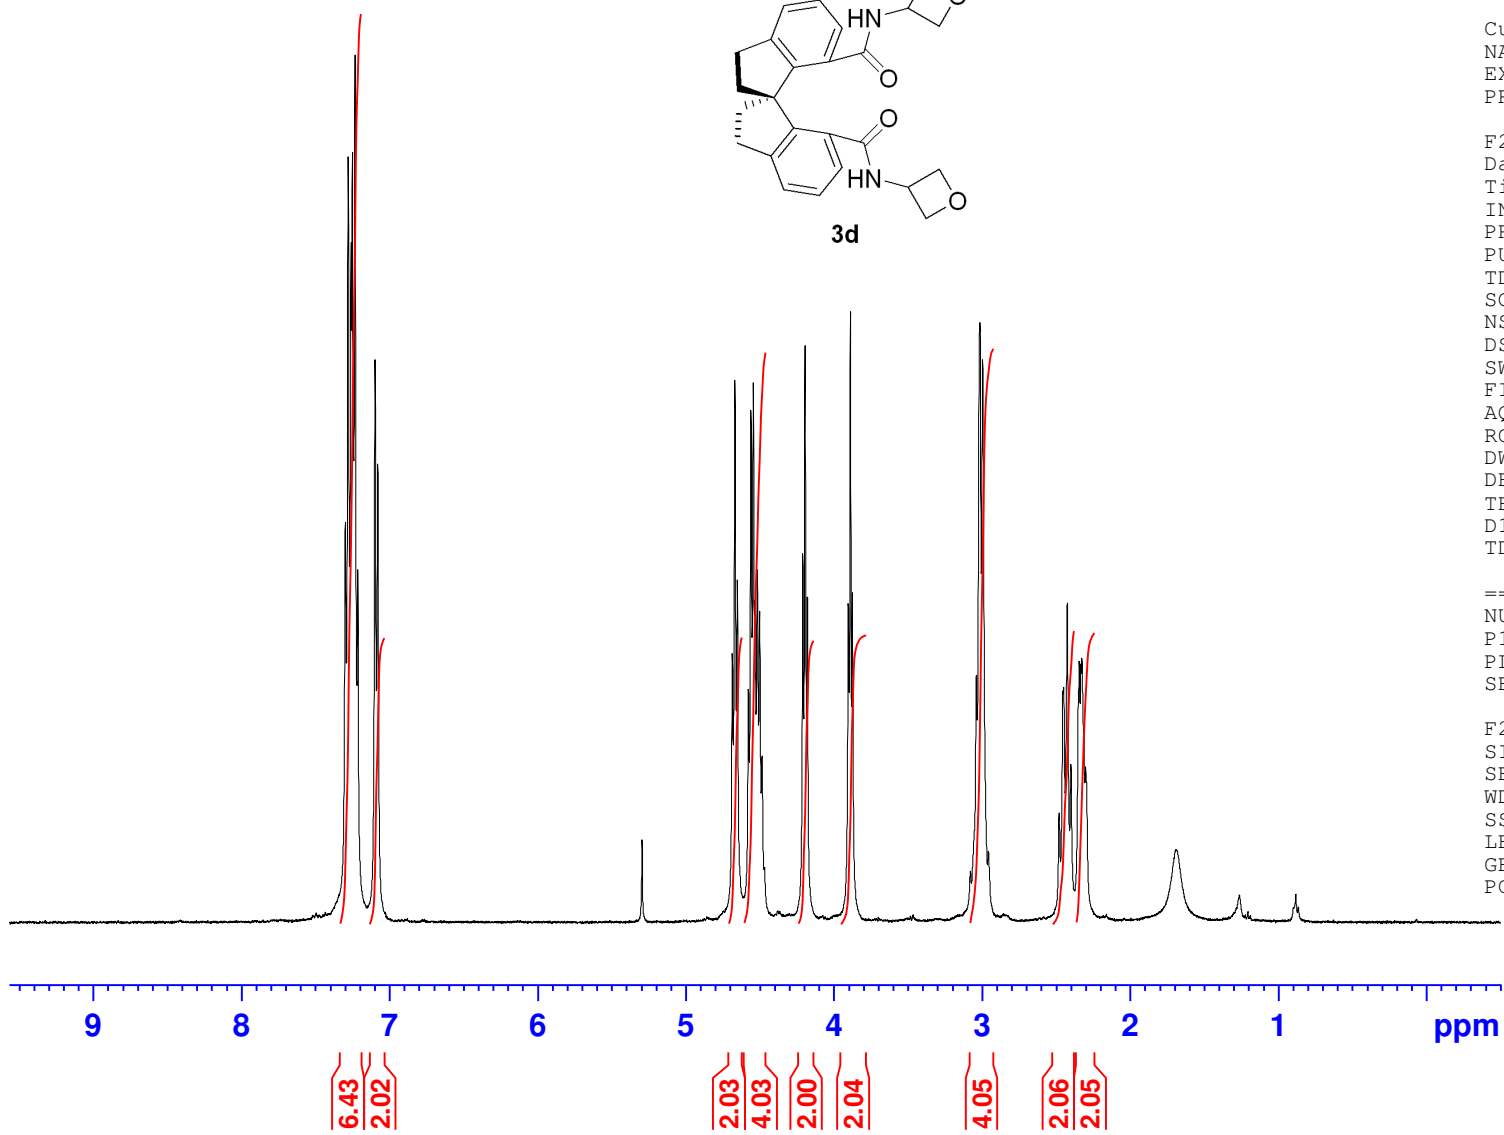





Current Data Parameters  
NAME 20181025-WJL-1-35  
EXPNO 2  
PROCNO 1

F2 - Acquisition Parameters  
Date\_ 20181025  
Time 22.13  
INSTRUM spect  
PROBHD 5 mm PABBO BB-  
PULPROG zgpg30  
TD 65536  
SOLVENT CDC13  
NS 112  
DS 2  
SWH 24038.461 Hz  
FIDRES 0.366798 Hz  
AQ 1.3631488 sec  
RG 90.5  
DW 20.800 usec  
DE 6.00 usec  
TE 295.5 K  
D1 2.0000000 sec  
d11 0.0300000 sec  
DELTA 1.89999998 sec  
TD0 1

==== CHANNEL f1 =====  
NUC1 13C  
P1 8.60 usec  
PL1 -3.00 dB  
SFO1 100.6228298 MHz

==== CHANNEL f2 =====  
CPDPRG[2] waltz16  
NUC2 1H  
PCPD2 80.00 usec  
PL12 14.39 dB  
PL13 18.00 dB  
PL2 -1.00 dB  
SFO2 400.1316005 MHz

F2 - Processing parameters  
SI 32768  
SF 100.6127792 MHz  
WDW EM  
SSB 0  
LB 1.00 Hz  
GB 0  
PC 1.40

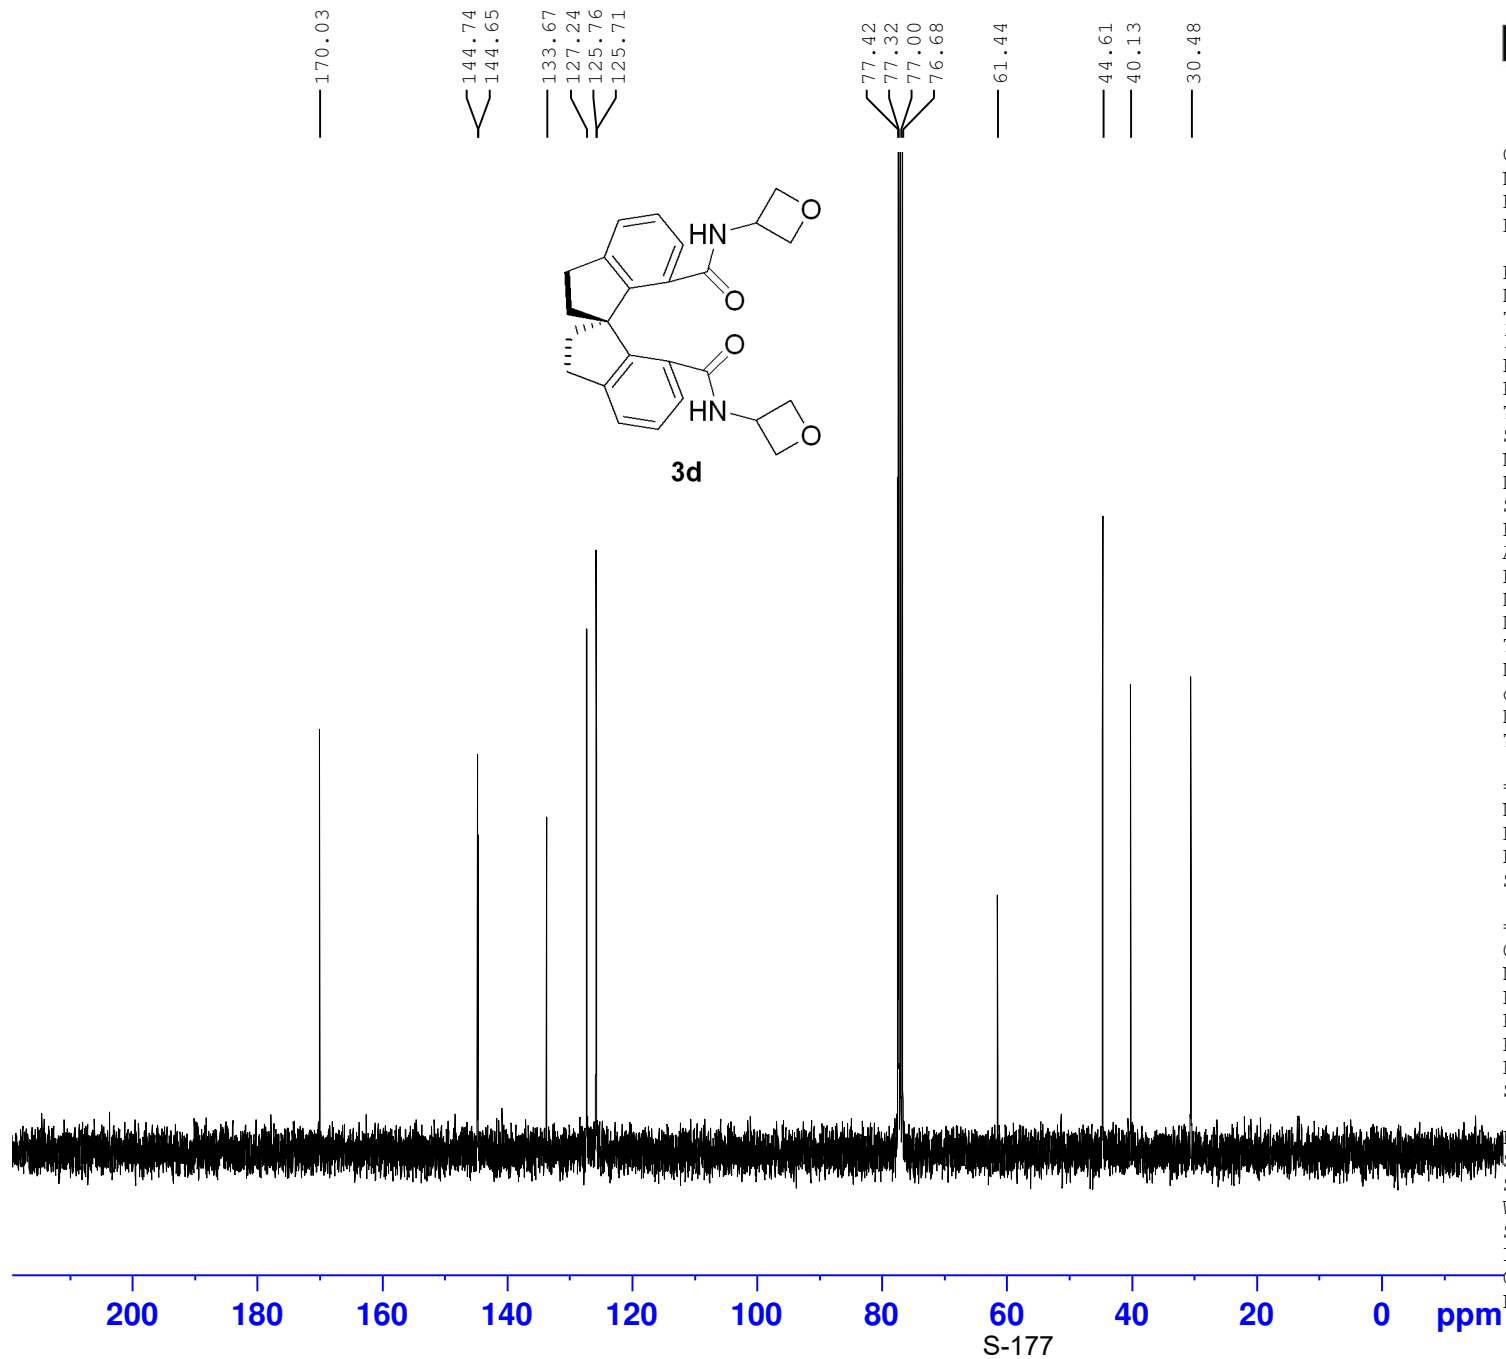



7.561  
7.545  
7.529  
7.527  
7.511  
7.508  
7.439  
7.436  
7.417  
7.407  
7.398  
7.388  
7.260  
4.207  
4.203  
4.181  
4.160  
4.157  
4.140  
4.122  
4.114  
4.096  
4.072  
4.070  
4.041  
4.038  
3.917  
3.897  
3.878  
3.384  
3.377  
3.352  
3.345

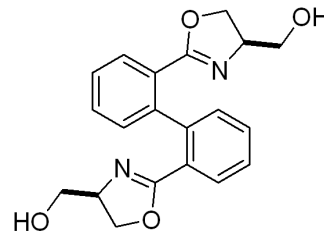

(±)-4a

Current Data Parameters  
NAME czl-2-5  
EXPNO 1  
PROCNO 1

F2 - Acquisition Parameters  
Date\_ 20170826  
Time 10.02  
INSTRUM spect  
PROBHD 5 mm PABBO BB/  
PULPROG zg30  
TD 65536  
SOLVENT CDC13  
NS 4  
DS 2  
SWH 8012.820 Hz  
FIDRES 0.122266 Hz  
AQ 4.0894465 sec  
RG 187.77  
DW 62.400 usec  
DE 6.50 usec  
TE 297.5 K  
D1 1.00000000 sec  
TD0 1

==== CHANNEL f1 =====  
SFO1 400.1324710 MHz  
NUC1 1H  
P1 14.50 usec  
PLW1 11.99499989 W

F2 - Processing parameters  
SI 65536  
SF 400.1300105 MHz  
WDW EM  
SSB 0  
LB 0.30 Hz  
GB 0  
PC 1.00

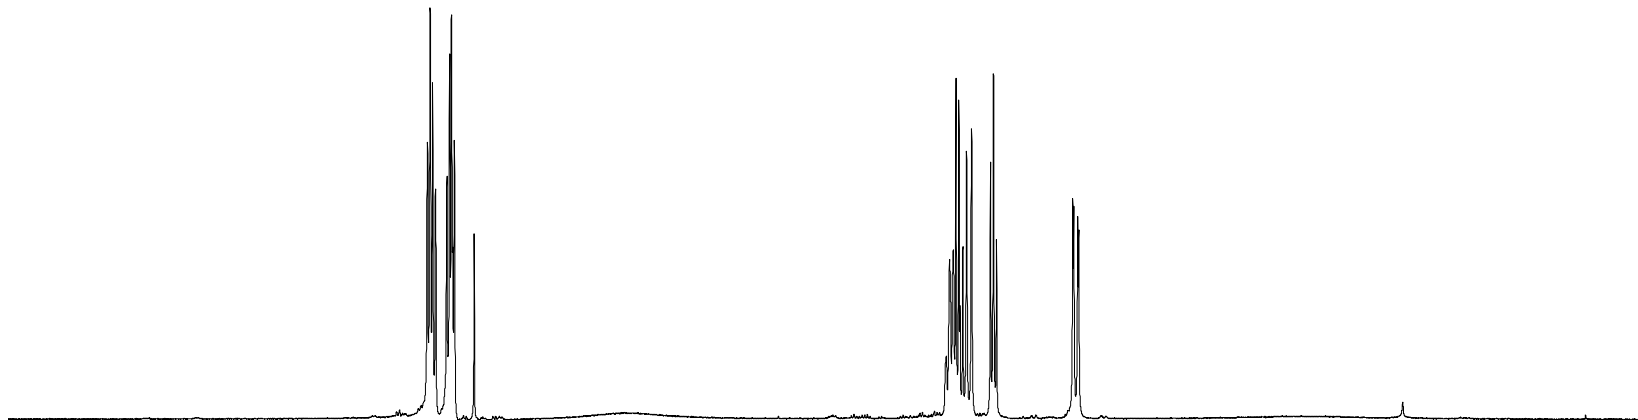

10 9 8 7 6 5 4 3 2 1 ppm

4.06  
4.03

6.04  
2.00  
2.05

S-178

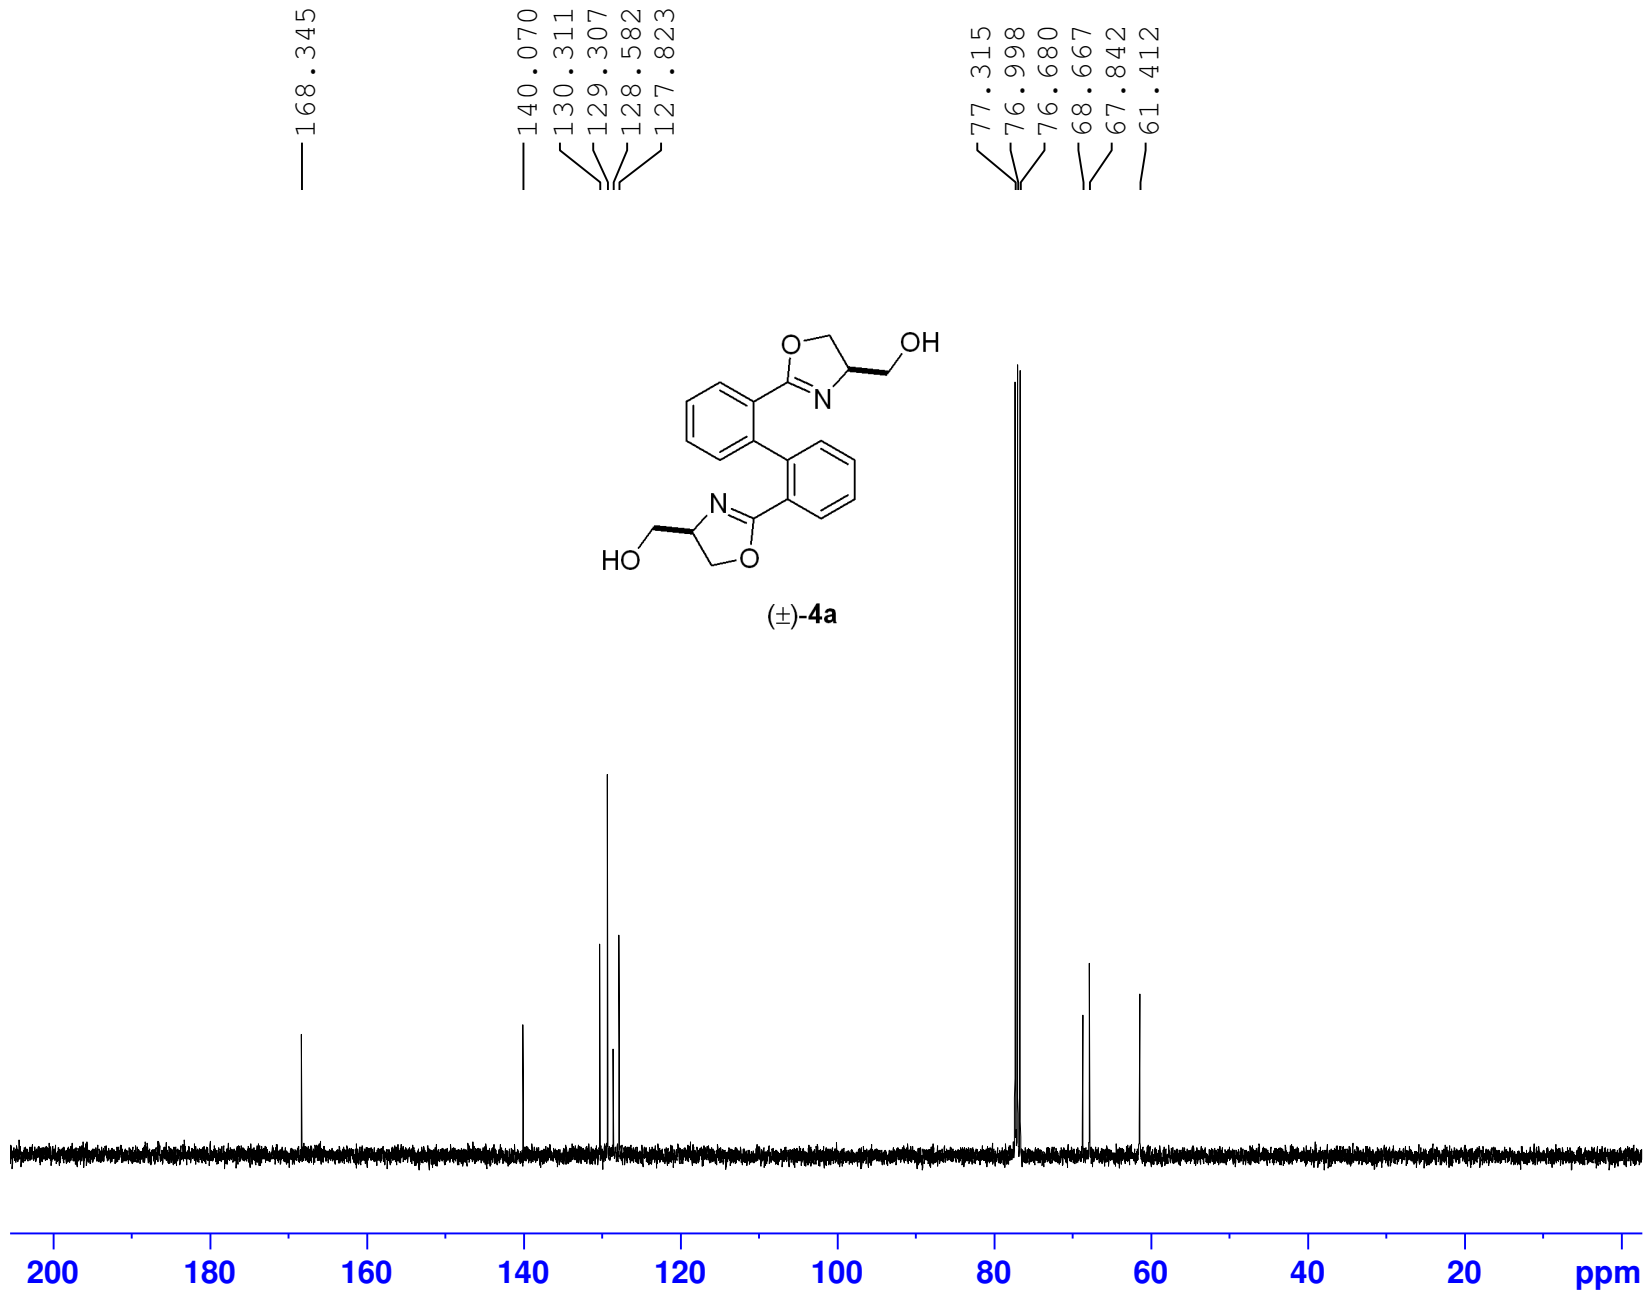

Current Data Parameters  
NAME czl-2-5  
EXPNO 2  
PROCNO 1

F2 - Acquisition Parameters  
Date\_ 20170826  
Time 10.07  
INSTRUM spect  
PROBHD 5 mm PABBO BB/  
PULPROG zgpg30  
TD 65536  
SOLVENT CDC13  
NS 78  
DS 2  
SWH 24038.461 Hz  
FIDRES 0.366798 Hz  
AQ 1.3631488 sec  
RG 196.92  
DW 20.800 usec  
DE 6.50 usec  
TE 297.8 K  
D1 2.00000000 sec  
D11 0.03000000 sec  
TD0 1

==== CHANNEL f1 =====  
SFO1 100.6228298 MHz  
NUC1 13C  
P1 9.70 usec  
PLW1 46.98899841 W

==== CHANNEL f2 =====  
SFO2 400.1316005 MHz  
NUC2 1H  
CPDPRG[2] waltz16  
PCPD2 90.00 usec  
PLW2 11.99499989 W  
PLW12 0.34213999 W  
PLW13 0.27713001 W

F2 - Processing parameters  
SI 32768  
SF 100.6127736 MHz  
WDW EM  
SSB 0  
LB 1.00 Hz  
GB 0  
PC 1.40



Current Data Parameters  
NAME hh-2-97B-h-fr1  
EXPNO 3  
PROCNO 1

F2 - Acquisition Parameters  
Date\_ 20181201  
Time 10.06  
INSTRUM spect  
PROBHD 5 mm PABBO BB/  
PULPROG zg30  
TD 65536  
SOLVENT Acetone  
NS 6  
DS 0  
SWH 8012.820 Hz  
FIDRES 0.122266 Hz  
AQ 4.0894465 sec  
RG 88.84  
DW 62.400 usec  
DE 6.50 usec  
TE 298.0 K  
D1 1.00000000 sec  
TD0 1

==== CHANNEL f1 =====  
SFO1 400.1324710 MHz  
NUC1 1H  
P1 14.50 usec  
PLW1 11.99499989 W

F2 - Processing parameters  
SI 65536  
SF 400.1300056 MHz  
WDW EM  
SSB 0  
LB 0.30 Hz  
GB 0  
PC 1.00

7.686  
7.608  
7.605  
7.591  
7.588  
7.585  
7.570  
7.567  
7.397  
7.394  
7.380  
7.376  
7.373  
7.359  
7.356  
7.255  
7.234  
4.145  
4.141  
4.137  
4.133  
4.119  
4.116  
3.972  
3.952  
3.947  
3.927  
3.868  
3.863  
3.837  
3.832  
3.560  
3.540  
3.519  
3.228  
3.220  
3.197  
3.189  
2.090  
2.059  
2.054  
2.048

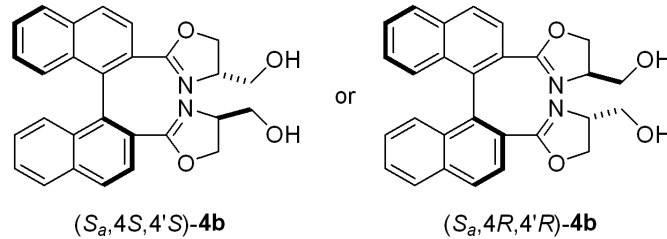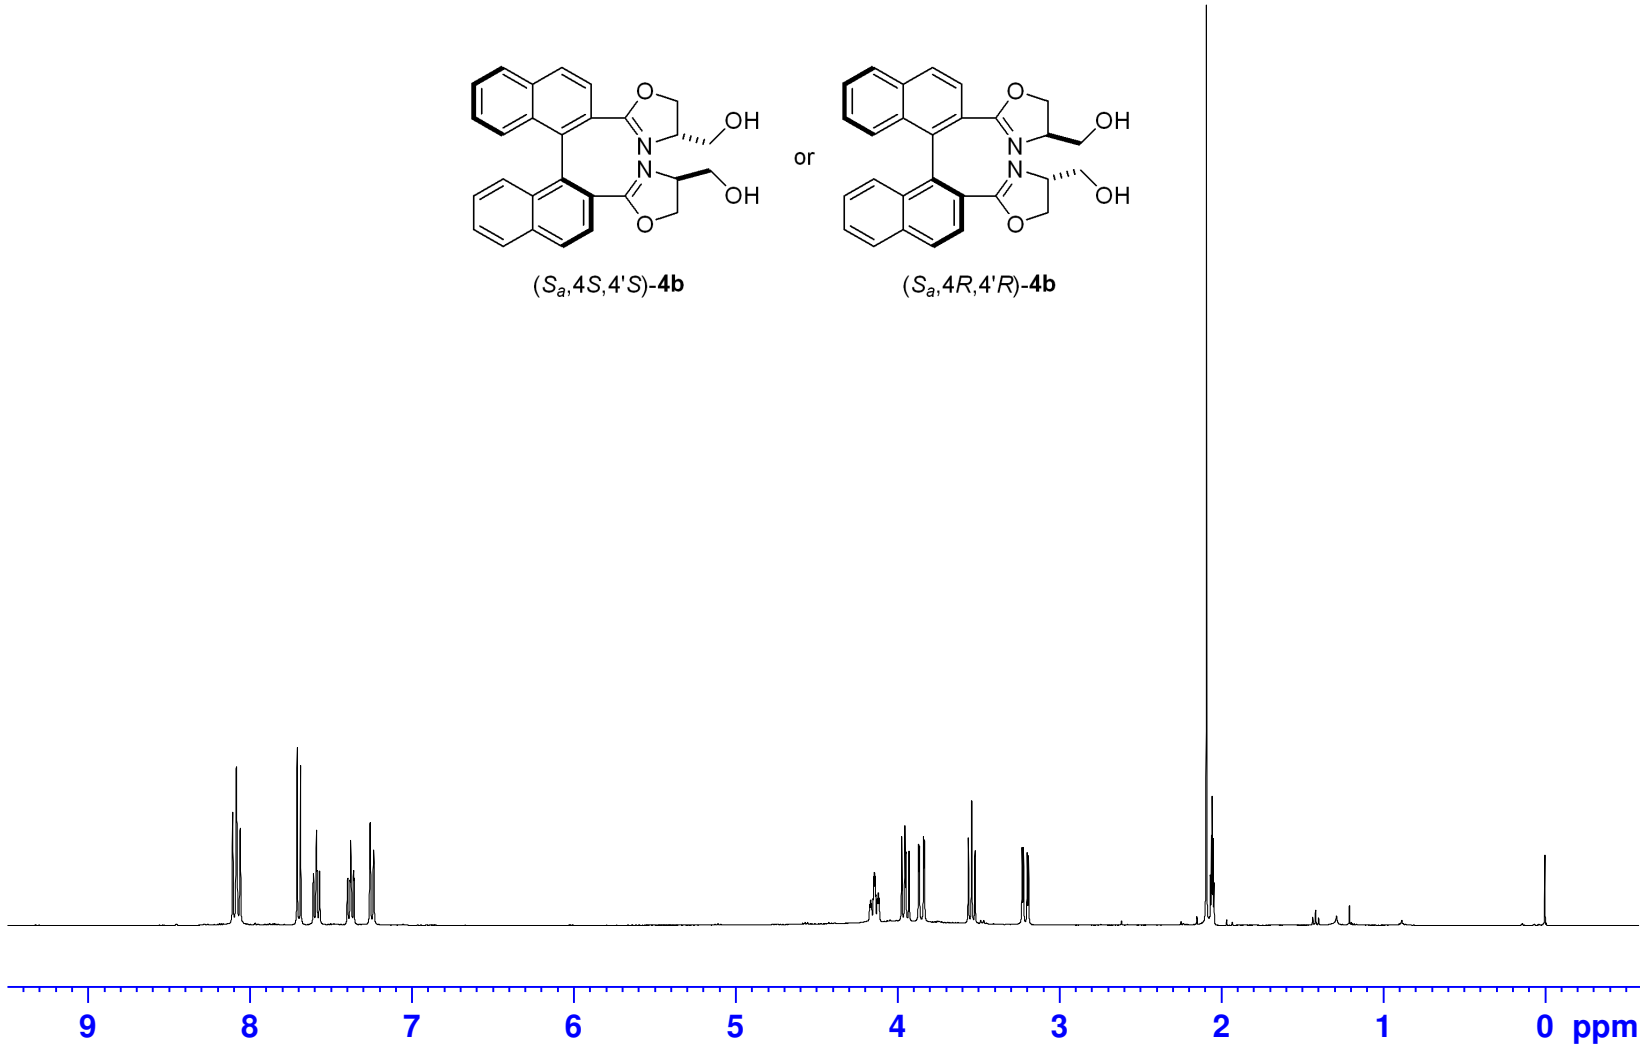

2.03  
0.98  
1.03  
1.00  
0.98

1.11  
1.11  
1.08  
1.04  
1.00

0.86

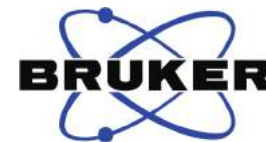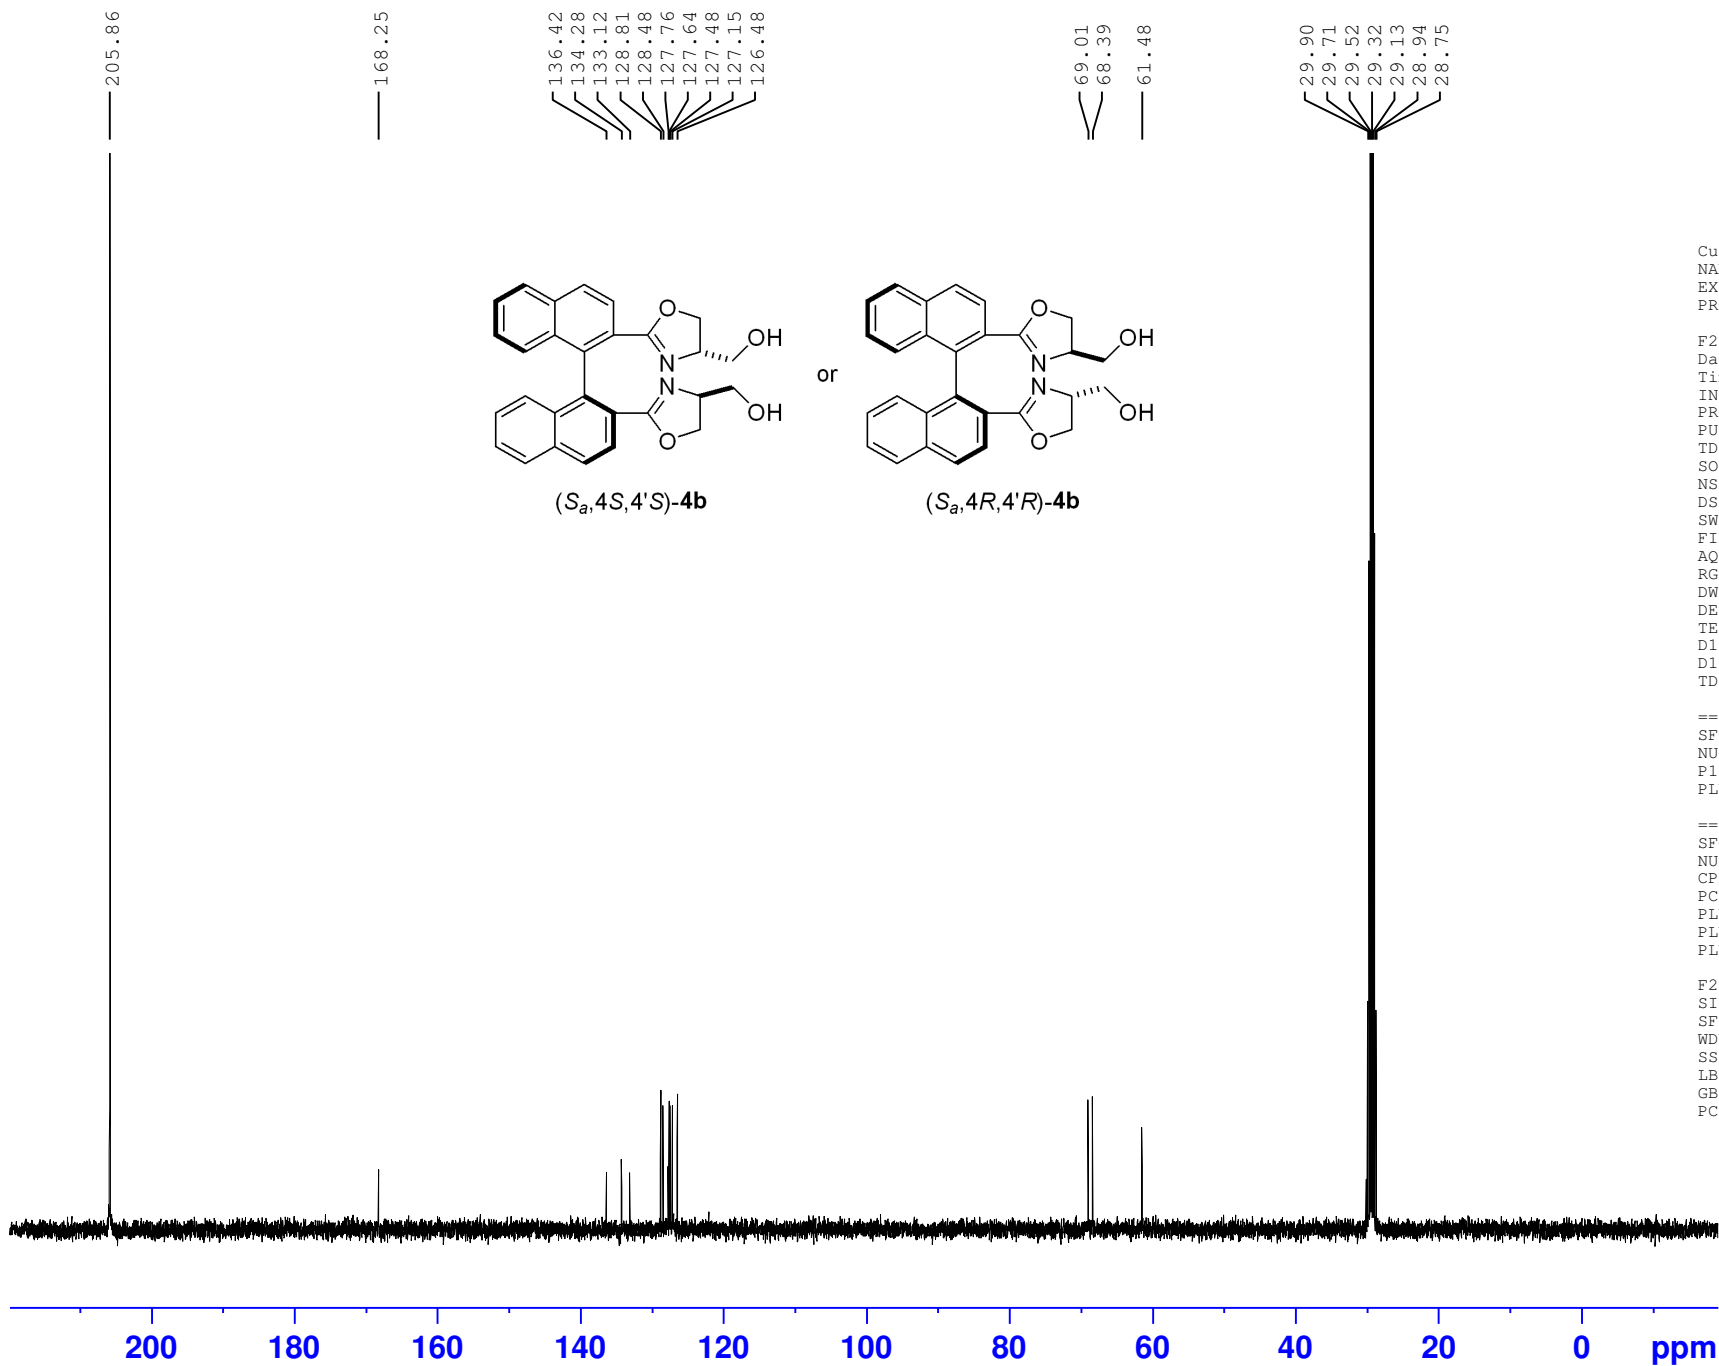

Current Data Parameters  
NAME hh-2-97B-c-fr1  
EXPNO 4  
PROCNO 1

F2 - Acquisition Parameters  
Date\_ 20181201  
Time 10.29  
INSTRUM spect  
PROBHD 5 mm PABBO BB/  
PULPROG zgpg30  
TD 65536  
SOLVENT Acetone  
NS 38  
DS 0  
SWH 24038.461 Hz  
FIDRES 0.366798 Hz  
AQ 1.3631488 sec  
RG 196.92  
DW 20.800 usec  
DE 6.50 usec  
TE 298.4 K  
D1 2.0000000 sec  
D11 0.0300000 sec  
TD0 1

==== CHANNEL f1 =====  
SFO1 100.6228298 MHz  
NUC1 13C  
P1 9.70 usec  
PLW1 46.98899841 W

==== CHANNEL f2 =====  
SFO2 400.1316005 MHz  
NUC2 1H  
CPDPRG[2] waltz16  
PCPD2 90.00 usec  
PLW2 11.99499989 W  
PLW12 0.34213999 W  
PLW13 0.27713001 W

F2 - Processing parameters  
SI 32768  
SF 100.6127344 MHz  
WDW EM  
SSB 0  
LB 1.00 Hz  
GB 0  
PC 1.40



4.328  
4.313  
4.302  
4.293  
4.211  
4.200  
4.184  
3.659  
3.628  
3.557  
3.546  
3.530  
3.518  
2.090  
2.065  
2.059  
2.054  
2.048  
2.043  
1.461

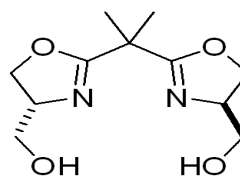

Current Data Parameters  
NAME hh-2-97-h-fr1  
EXPNO 4  
PROCNO 1

F2 - Acquisition Parameters  
Date\_ 20181201  
Time 19.57  
INSTRUM spect  
PROBHD 5 mm PABBO BB/  
PULPROG zg30  
TD 65536  
SOLVENT Acetone  
NS 6  
DS 0  
SWH 8012.820 Hz  
FIDRES 0.122266 Hz  
AQ 4.0894465 sec  
RG 103.52  
DW 62.400 usec  
DE 6.50 usec  
TE 297.3 K  
D1 1.00000000 sec  
TD0 1

==== CHANNEL f1 =====  
SFO1 400.1324710 MHz  
NUC1 1H  
P1 14.50 usec  
PLW1 11.99499989 W

F2 - Processing parameters  
SI 65536  
SF 400.1300056 MHz  
WDW EM  
SSB 0  
LB 0.30 Hz  
GB 0  
PC 1.00

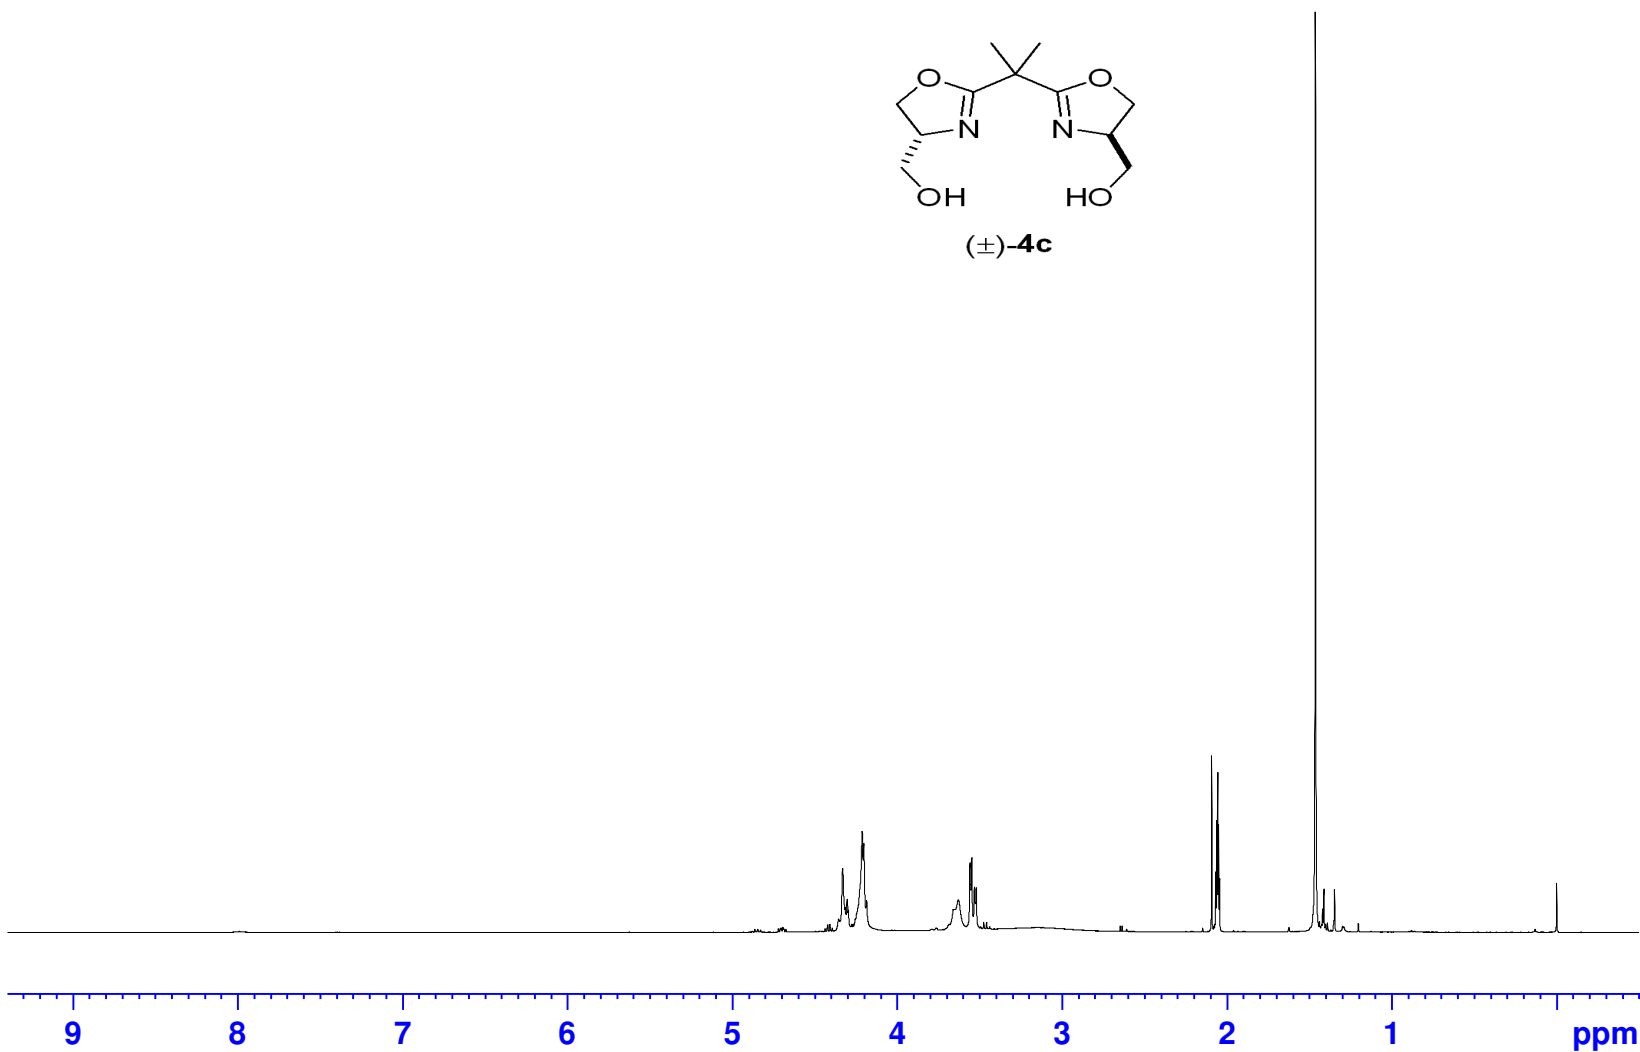

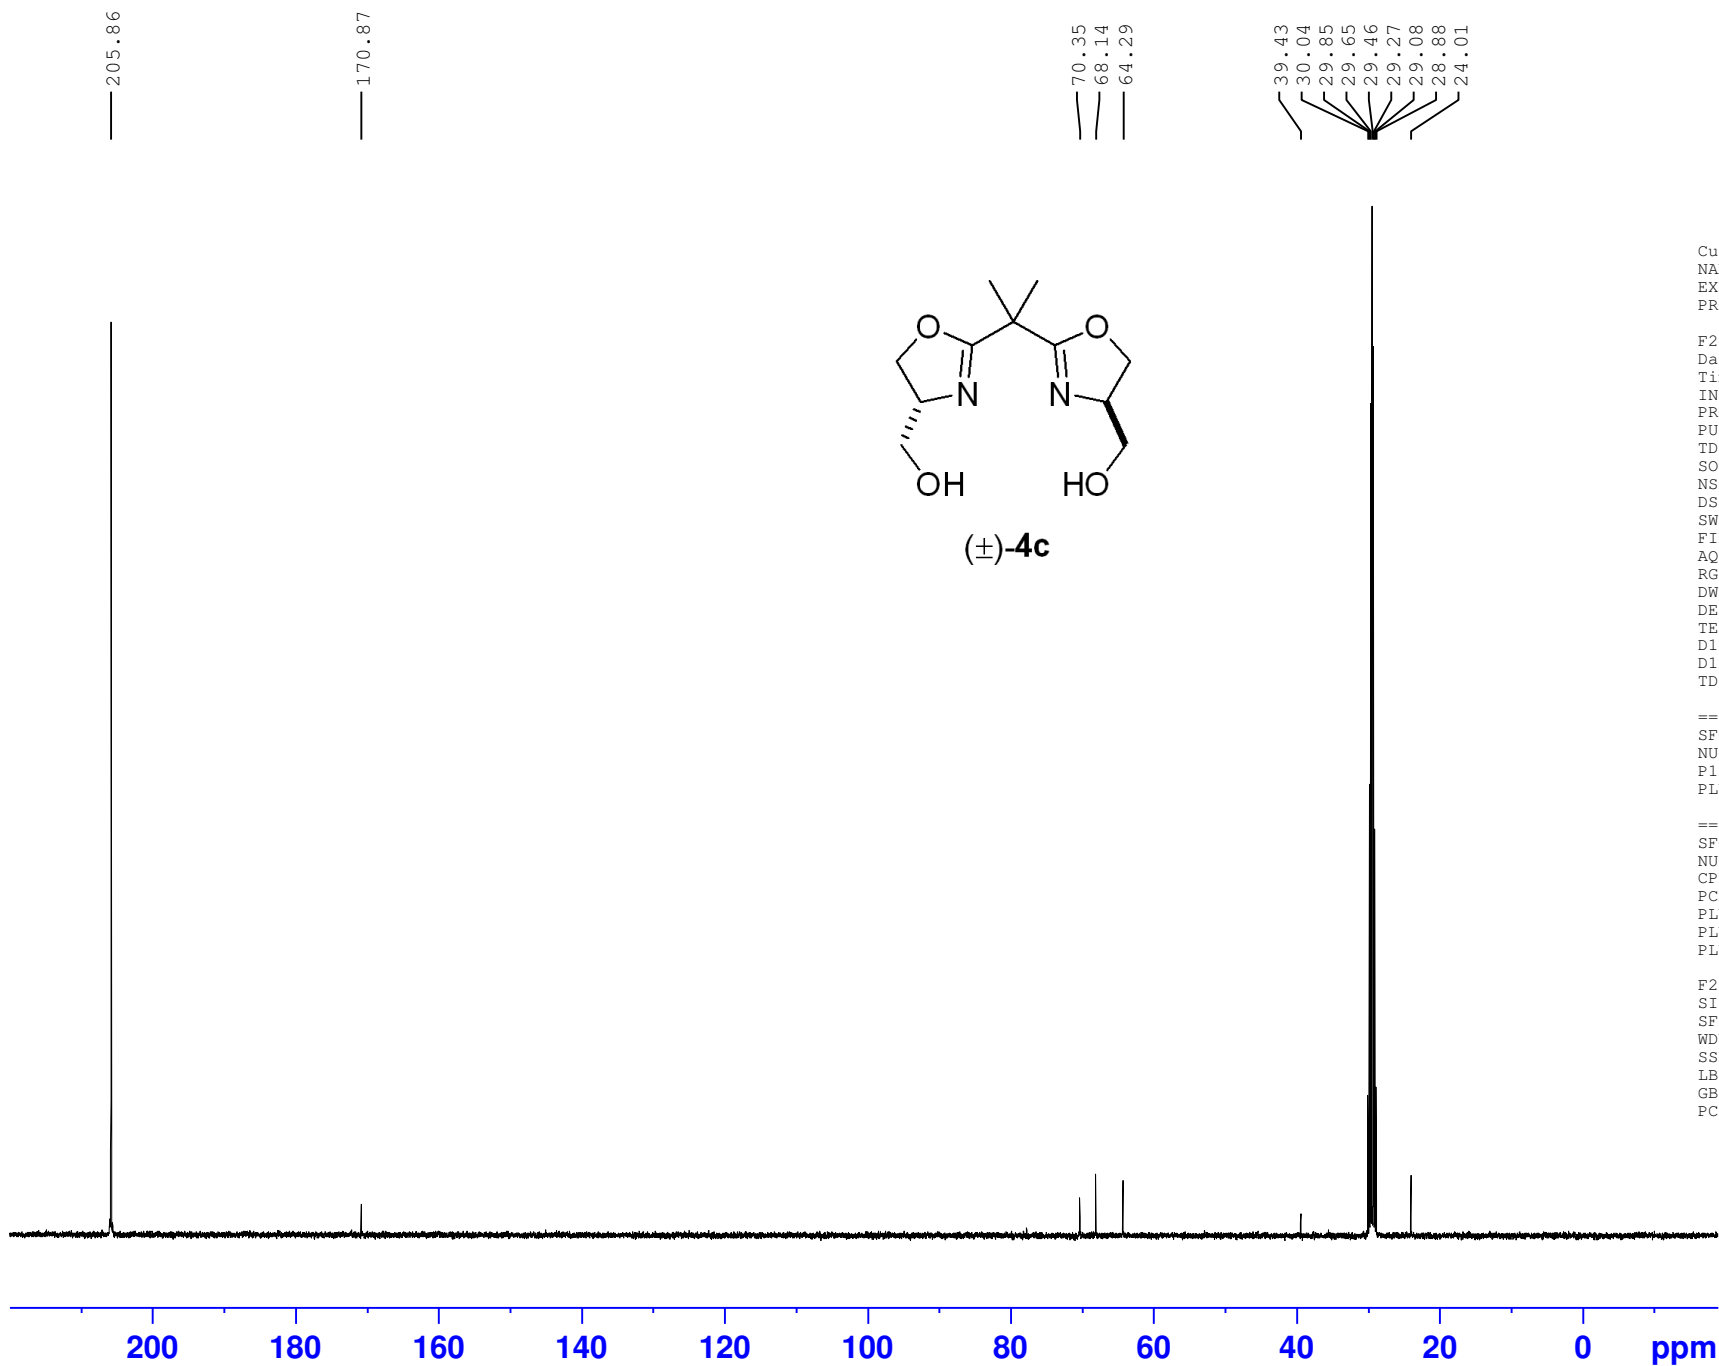

Current Data Parameters  
NAME hh-2-97-c-fr1  
EXPNO 4  
PROCNO 1

F2 - Acquisition Parameters  
Date\_ 20181201  
Time 20.14  
INSTRUM spect  
PROBHD 5 mm PABBO BB/  
PULPROG zgpg30  
TD 65536  
SOLVENT Acetone  
NS 244  
DS 0  
SWH 24038.461 Hz  
FIDRES 0.366798 Hz  
AQ 1.3631488 sec  
RG 196.92  
DW 20.800 usec  
DE 6.50 usec  
TE 298.5 K  
D1 2.0000000 sec  
D11 0.0300000 sec  
TDO 1

==== CHANNEL f1 =====  
SFO1 100.6228298 MHz  
NUC1 13C  
P1 9.70 usec  
PLW1 46.98899841 W

==== CHANNEL f2 =====  
SFO2 400.1316005 MHz  
NUC2 1H  
PCPD2 waltz16  
PLW2 90.00 usec  
PLW12 11.99499989 W  
PLW13 0.34213999 W  
PLW13 0.27713001 W

F2 - Processing parameters  
SI 32768  
SF 100.6127172 MHz  
WDW EM  
SSB 0  
LB 1.00 Hz  
GB 0  
PC 1.40



4.323  
4.306  
4.303  
4.284  
4.226  
4.209  
4.194  
4.176  
4.165  
4.160  
3.605  
3.595  
3.578  
3.571  
3.542  
3.532  
3.514  
3.509  
3.504  
2.090  
2.059  
2.054  
2.048  
1.478  
1.452  
1.422

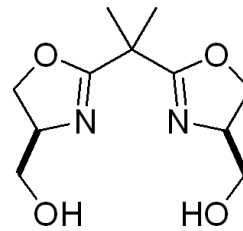

meso-4c

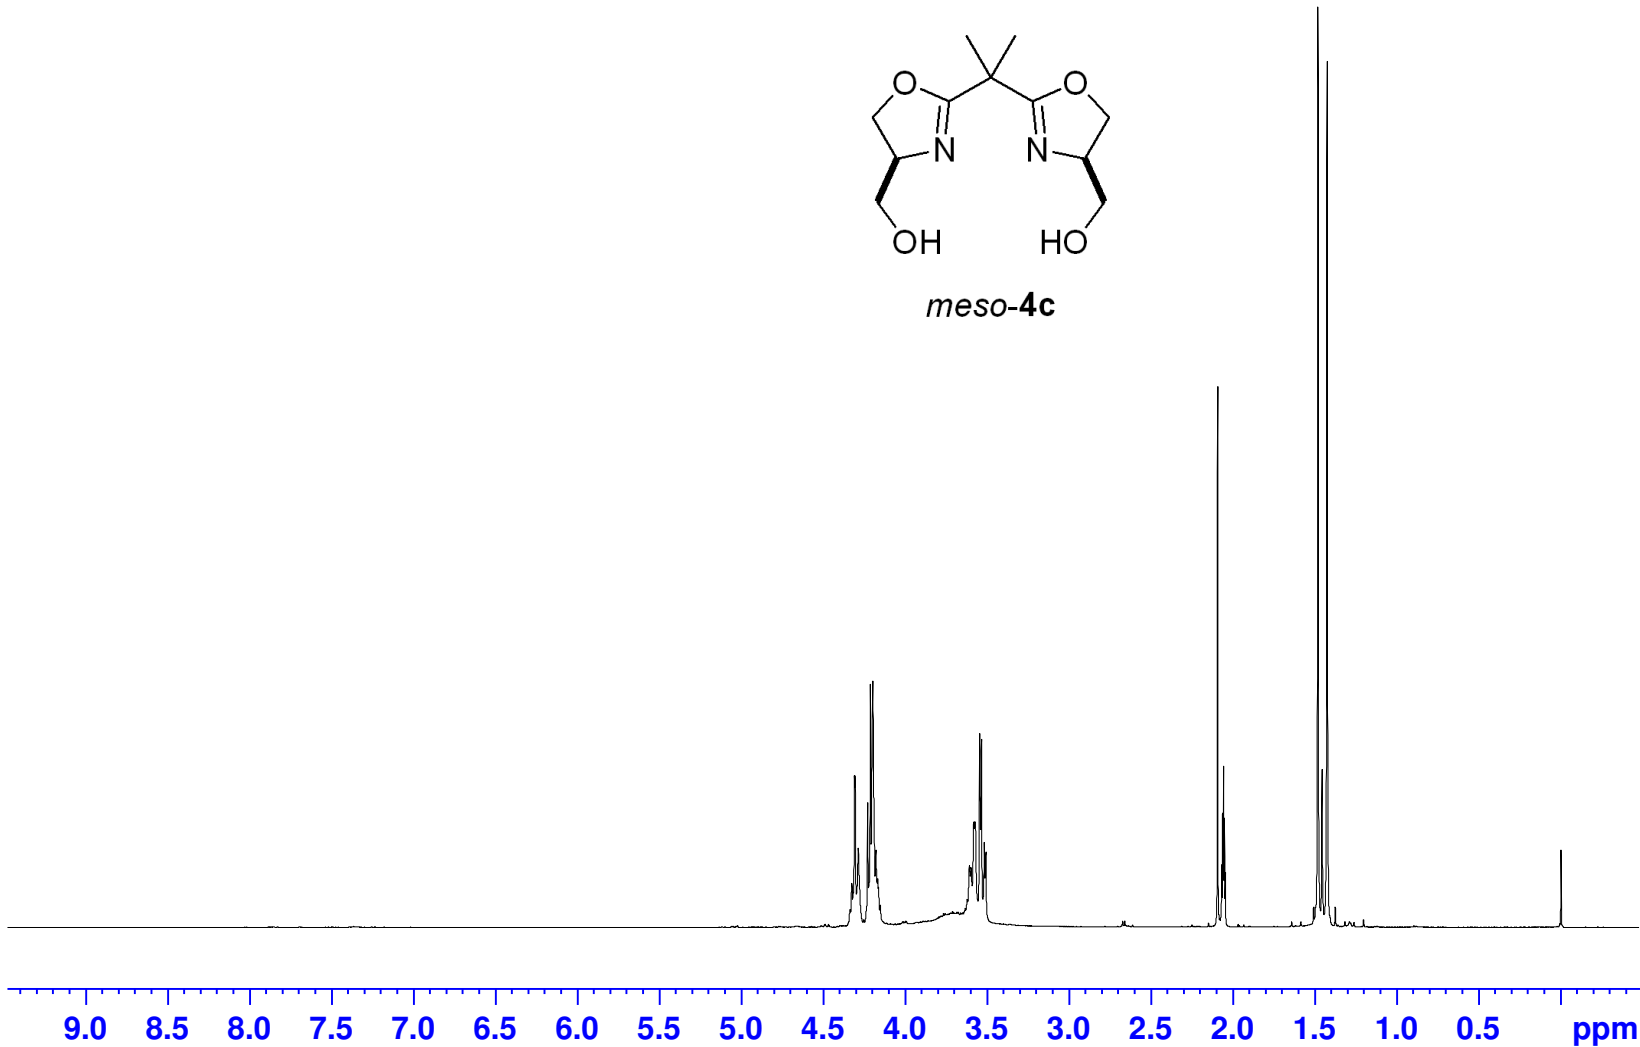

Current Data Parameters  
NAME hh-2-97-h-fr2  
EXPNO 2  
PROCNO 1

F2 - Acquisition Parameters  
Date\_ 20181201  
Time 14.14  
INSTRUM spect  
PROBHD 5 mm PABBO BB/  
PULPROG zg30  
TD 65536  
SOLVENT Acetone  
NS 5  
DS 0  
SWH 8012.820 Hz  
FIDRES 0.122266 Hz  
AQ 4.0894465 sec  
RG 82.92  
DW 62.400 usec  
DE 6.50 usec  
TE 295.9 K  
D1 1.00000000 sec  
TD0 1

==== CHANNEL f1 =====  
SFO1 400.1324710 MHz  
NUC1 1H  
P1 14.50 usec  
PLW1 11.99499989 W

F2 - Processing parameters  
SI 65536  
SF 400.1300056 MHz  
WDW EM  
SSB 0  
LB 0.30 Hz  
GB 0  
PC 1.00



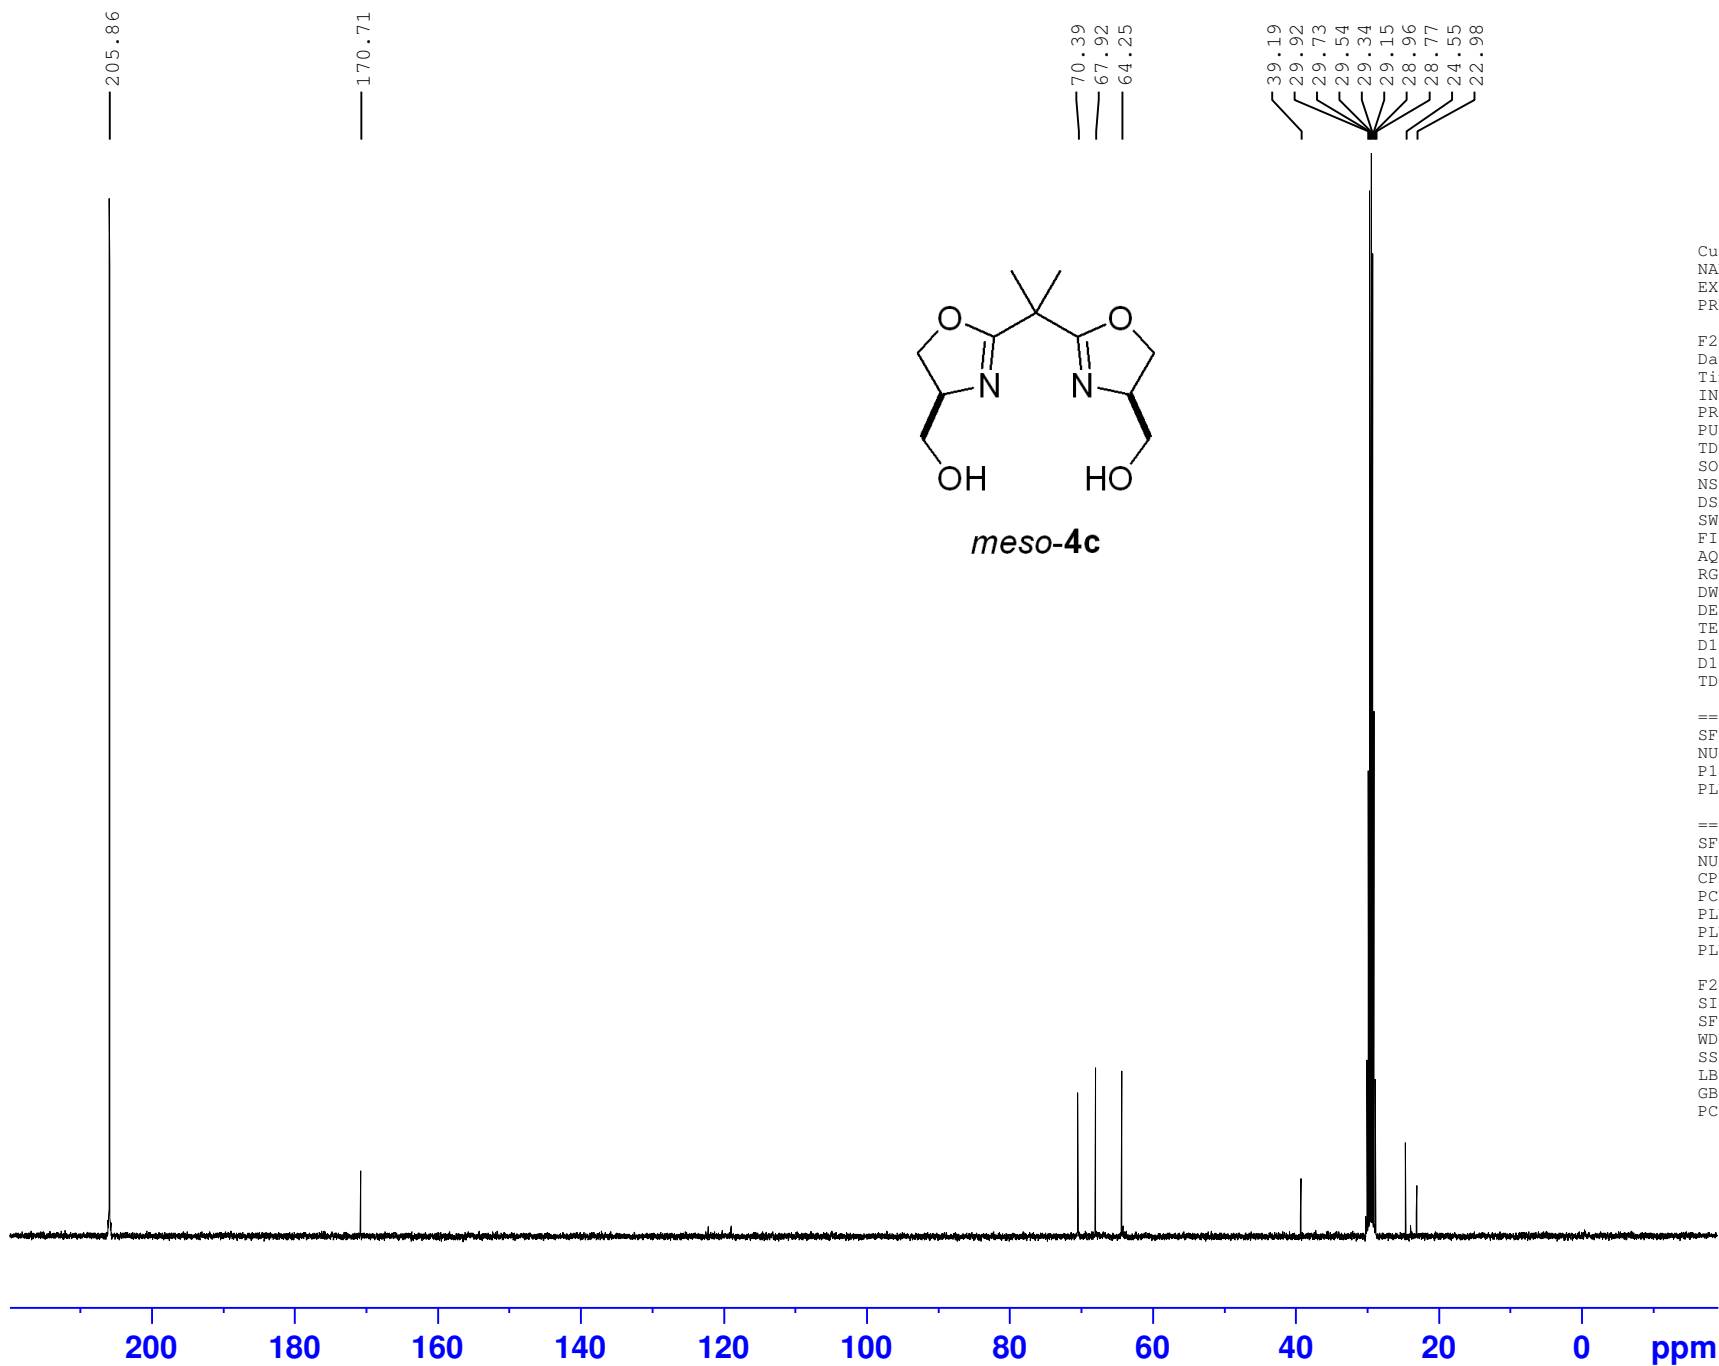

Current Data Parameters  
NAME hh-2-97-c-fr2  
EXPNO 1  
PROCNO 1

F2 - Acquisition Parameters  
Date\_ 20181201  
Time 14.26  
INSTRUM spect  
PROBHD 5 mm PABBO BB/  
PULPROG zgpg30  
TD 65536  
SOLVENT Acetone  
NS 200  
DS 0  
SWH 24038.461 Hz  
FIDRES 0.366798 Hz  
AQ 1.3631488 sec  
RG 196.92  
DW 20.800 usec  
DE 6.50 usec  
TE 296.9 K  
D1 2.0000000 sec  
D11 0.03000000 sec  
TDO 1

==== CHANNEL f1 =====  
SFO1 100.6228298 MHz  
NUC1 13C  
P1 9.70 usec  
PLW1 46.98899841 W

==== CHANNEL f2 =====  
SFO2 400.1316005 MHz  
NUC2 1H  
CPDPRG[2] waltz16  
PCPD2 90.00 usec  
PLW2 11.99499989 W  
PLW12 0.34213999 W  
PLW13 0.27713001 W

F2 - Processing parameters  
SI 32768  
SF 100.6127317 MHz  
WDW EM  
SSB 0  
LB 1.00 Hz  
GB 0  
PC 1.40



7.562  
7.543  
7.424  
7.405  
7.273  
7.260  
7.254  
7.236  
5.825  
4.104  
4.073  
4.070  
4.057  
4.040  
4.035  
4.033  
4.028  
4.011  
3.997  
3.972  
3.329  
3.322  
3.298  
3.291  
3.075  
3.063  
3.050  
3.036  
3.028  
3.015  
2.998  
2.977  
2.958  
2.937  
2.449  
2.421  
2.399  
2.372  
2.294  
2.277  
2.265  
2.247

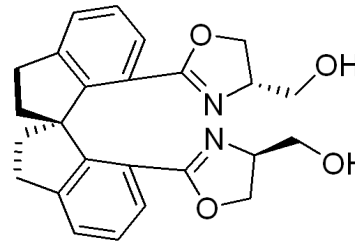

(*R<sub>a</sub>*,4*S*,4'*S*)-4d

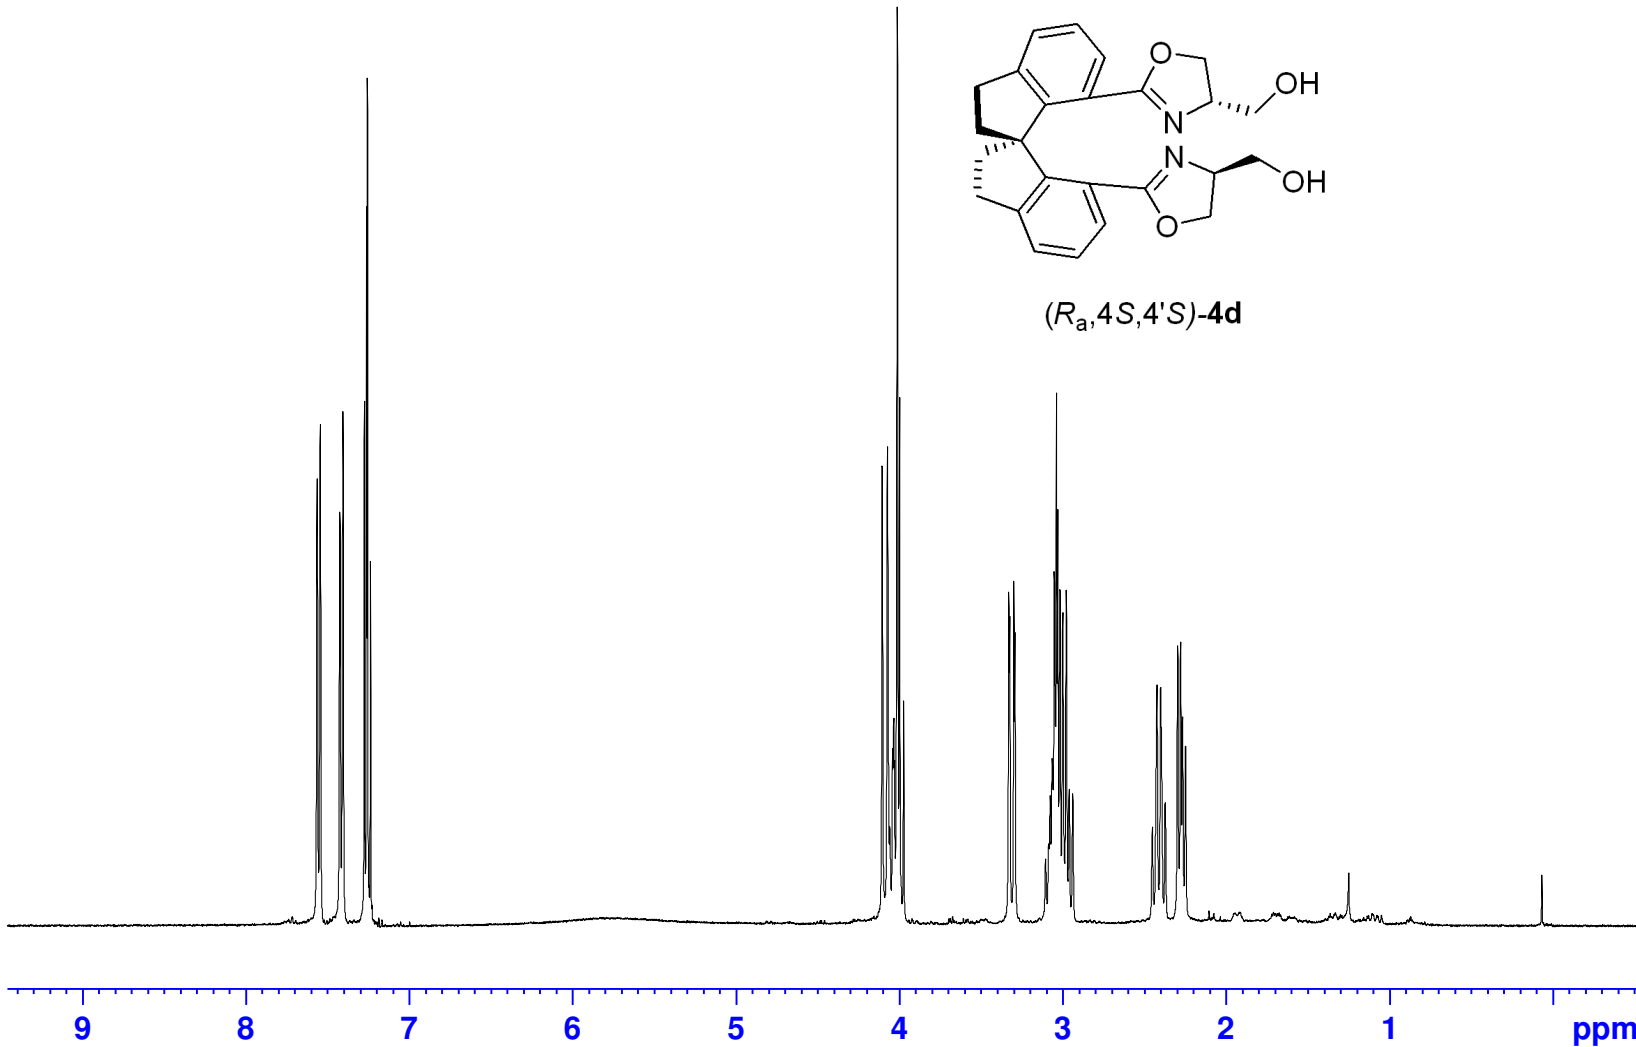

Current Data Parameters  
NAME hh-2-106A-h-fr1  
EXPNO 2  
PROCNO 1

F2 - Acquisition Parameters  
Date\_ 20181203  
Time 19.16  
INSTRUM spect  
PROBHD 5 mm PABBO BB/  
PULPROG zg30  
TD 65536  
SOLVENT CDC13  
NS 4  
DS 0  
SWH 8012.820 Hz  
FIDRES 0.122266 Hz  
AQ 4.0894465 sec  
RG 142.88  
DW 62.400 usec  
DE 6.50 usec  
TE 295.5 K  
D1 1.00000000 sec  
TD0 1

==== CHANNEL f1 =====  
SFO1 400.1324710 MHz  
NUC1 1H  
P1 14.50 usec  
PLW1 11.99499989 W

F2 - Processing parameters  
SI 65536  
SF 400.1300102 MHz  
WDW EM  
SSB 0  
LB 0.30 Hz  
GB 0  
PC 1.00

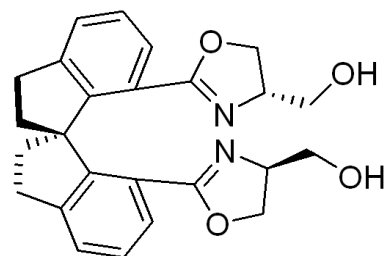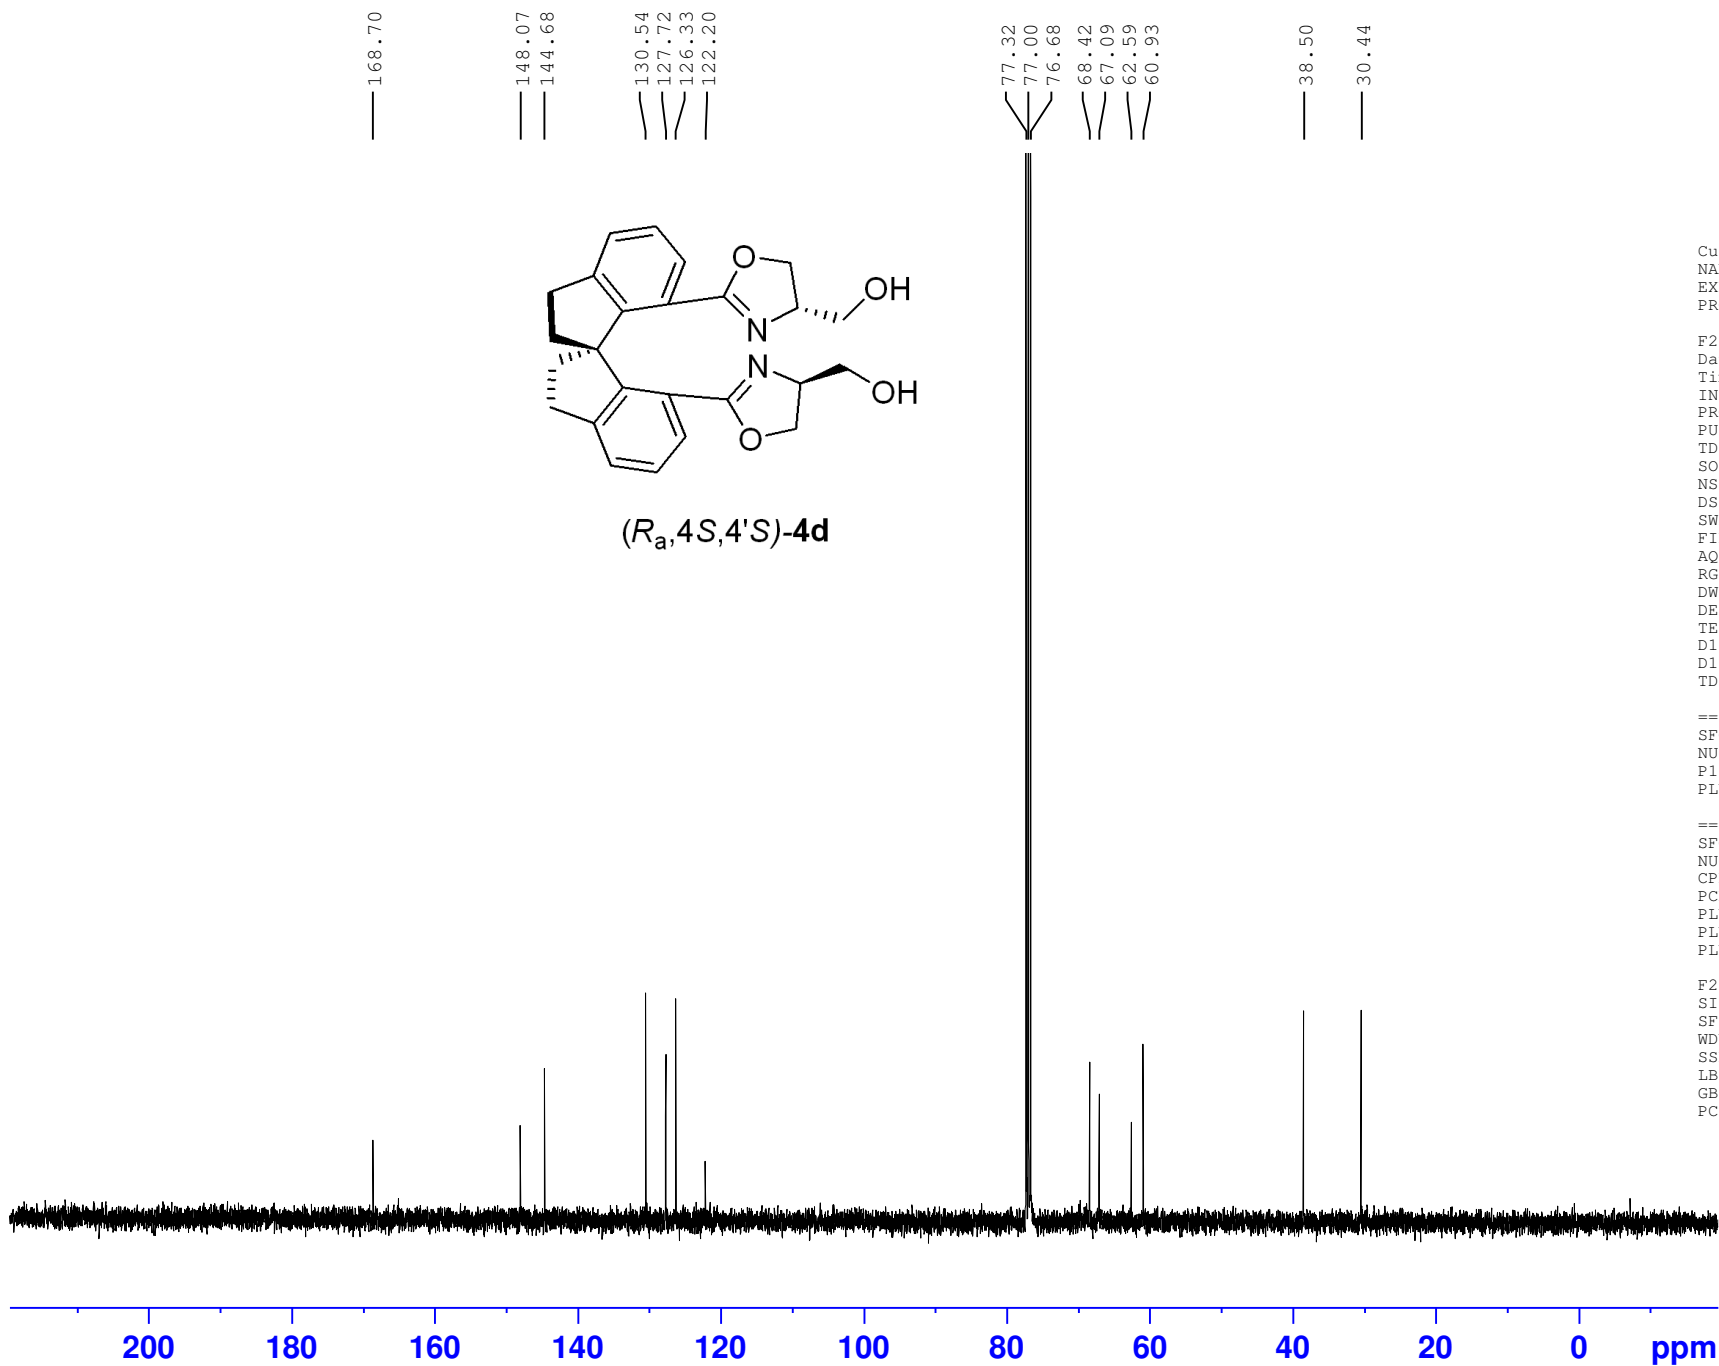

Current Data Parameters  
NAME hh-2-106A-c-fr1  
EXPNO 2  
PROCNO 1

F2 - Acquisition Parameters  
Date\_ 20181203  
Time 19.23  
INSTRUM spect  
PROBHD 5 mm PABBO BB/  
PULPROG zgpg30  
TD 65536  
SOLVENT CDCl3  
NS 110  
DS 0  
SWH 24038.461 Hz  
FIDRES 0.366798 Hz  
AQ 1.3631488 sec  
RG 196.92  
DW 20.800 usec  
DE 6.50 usec  
TE 296.6 K  
D1 2.0000000 sec  
D11 0.0300000 sec  
TD0 1

==== CHANNEL f1 =====  
SFO1 100.6228298 MHz  
NUC1 13C  
P1 9.70 usec  
PLW1 46.98899841 W

==== CHANNEL f2 =====  
SFO2 400.1316005 MHz  
NUC2 1H  
CPDPRG[2] waltz16  
PCPD2 90.00 usec  
PLW2 11.99499989 W  
PLW12 0.34213999 W  
PLW13 0.27713001 W

F2 - Processing parameters  
SI 32768  
SF 100.6127722 MHz  
WDW EM  
SSB 0  
LB 1.00 Hz  
GB 0  
PC 1.40



7.652  
7.633  
7.525  
7.506  
7.397  
7.380  
7.366  
7.260  
7.227  
7.222  
7.208  
7.203  
7.189  
7.184  
3.958  
3.940  
3.934  
3.922  
3.916  
3.910  
3.885  
3.880  
3.368  
3.358  
3.354  
3.343  
3.299  
3.289  
3.269  
3.259  
3.145  
3.126  
3.122  
3.103  
3.048  
3.041  
3.021  
2.997  
2.988  
2.975  
2.966  
2.938  
2.919  
2.913  
2.894  
2.477  
2.260  
2.242

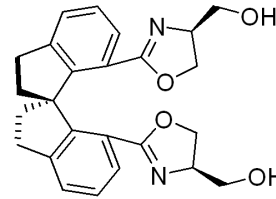

**(R<sub>a</sub>,4S,4'R)-4d**

or

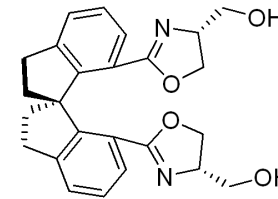

**(R<sub>a</sub>,4R,4'S)-4d**

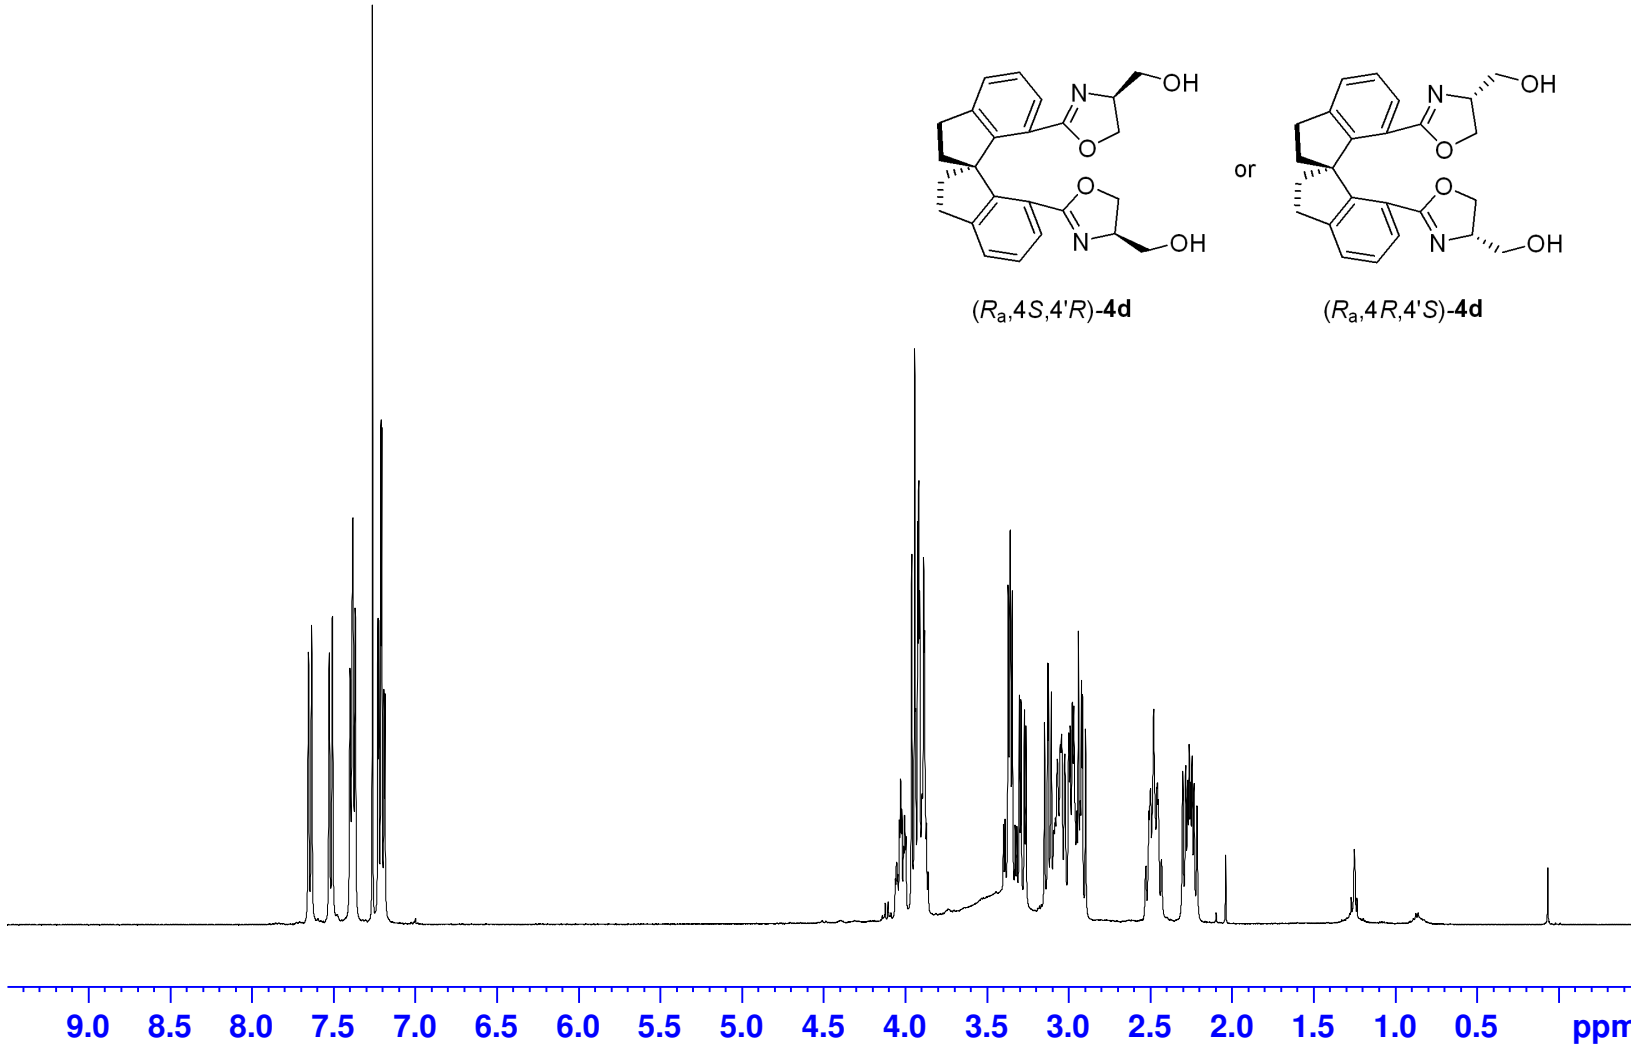

Current Data Parameters  
NAME hh-2-106A-h-fr2  
EXPNO 5  
PROCNO 1

F2 - Acquisition Parameters  
Date\_ 20181208  
Time 12.59  
INSTRUM spect  
PROBHD 5 mm PABBO BB/  
PULPROG zg30  
TD 65536  
SOLVENT CDC13  
NS 5  
DS 0  
SWH 8012.820 Hz  
FIDRES 0.122266 Hz  
AQ 4.0894465 sec  
RG 82.92  
DW 62.400 usec  
DE 6.50 usec  
TE 295.6 K  
D1 1.00000000 sec  
TD0 1

==== CHANNEL f1 =====  
SFO1 400.1324710 MHz  
NUC1 1H  
P1 14.50 usec  
PLW1 11.99499989 W

F2 - Processing parameters  
SI 65536  
SF 400.1300101 MHz  
WDW EM  
SSB 0  
LB 0.30 Hz  
GB 0  
PC 1.00

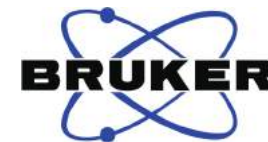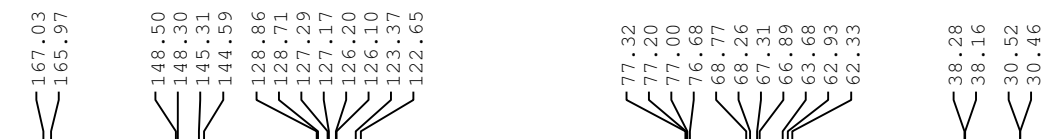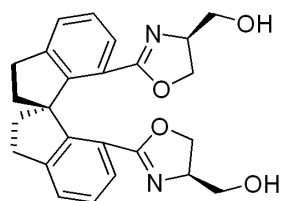

(*R<sub>a</sub>*,4*S*,4'*R*)-4d

or

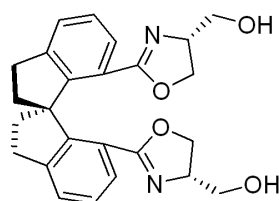

(*R<sub>a</sub>*,4*R*,4'*S*)-4d

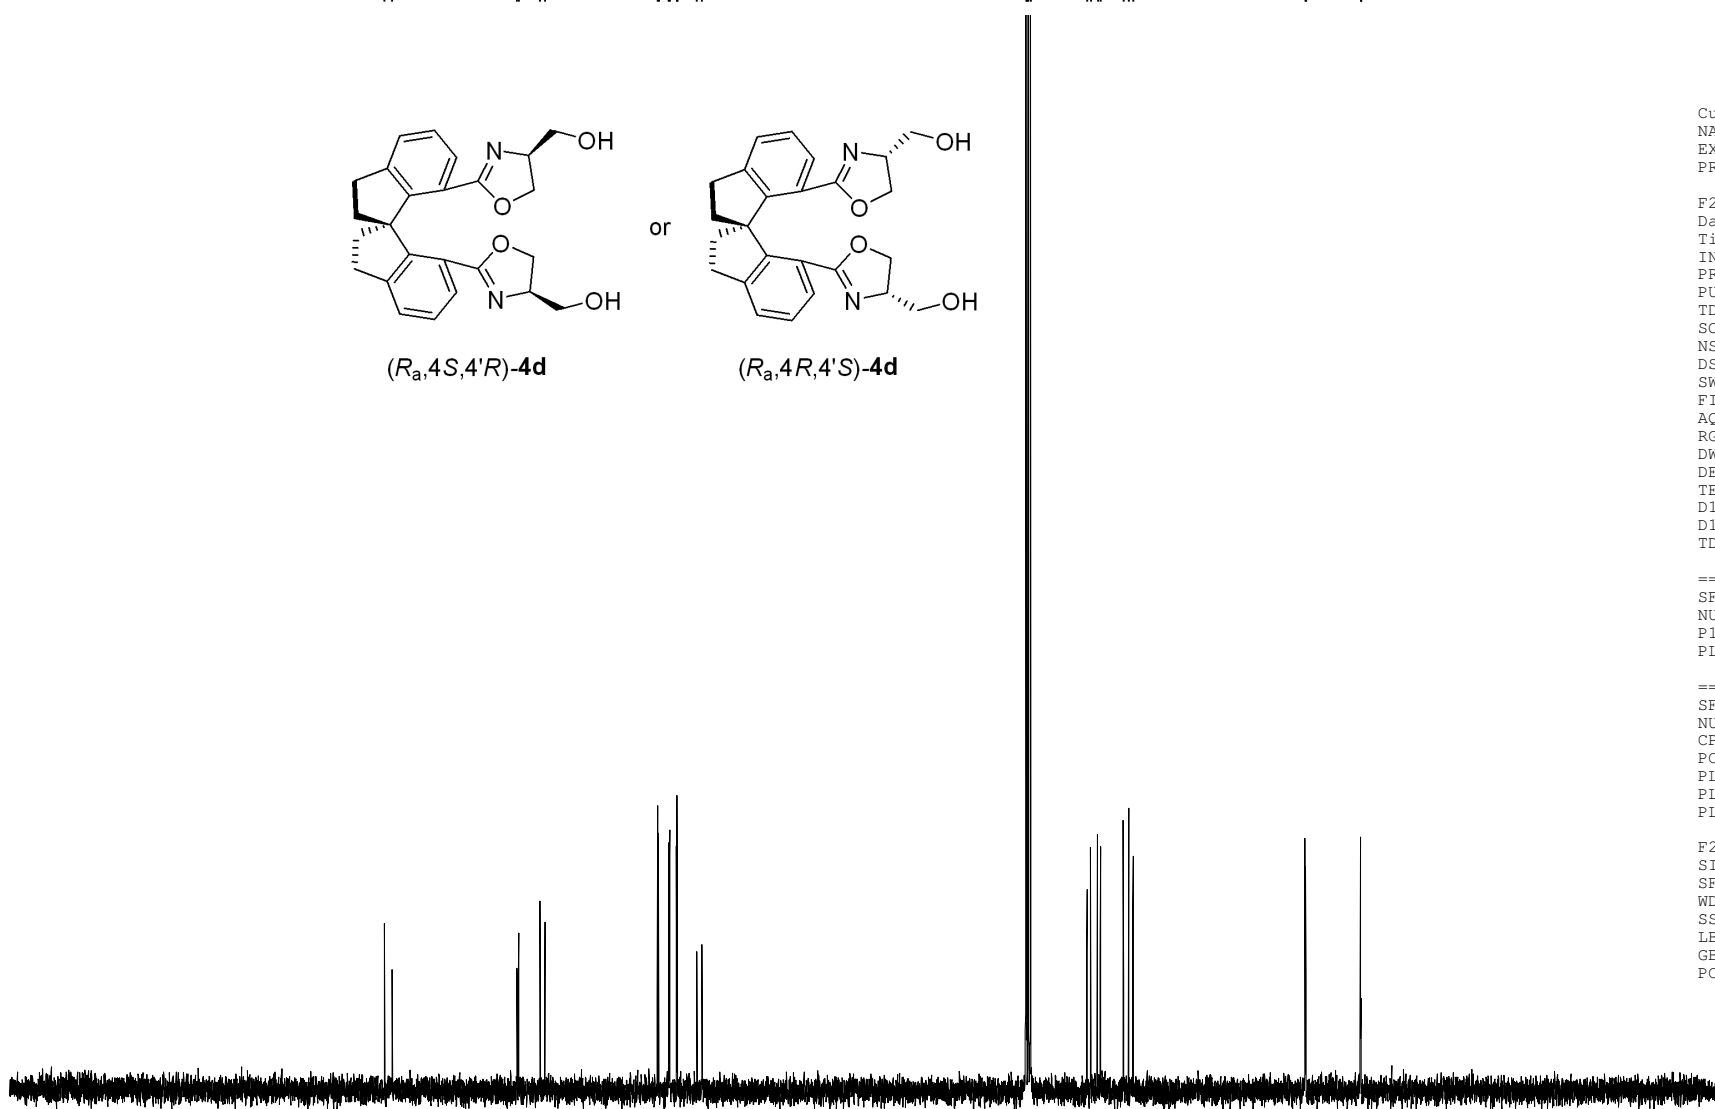

200 180 160 140 120 100 80 60 40 20 0 ppm

S-189

Current Data Parameters  
NAME hh-2-106A-c-fr2  
EXPNO 5  
PROCNO 1

F2 - Acquisition Parameters  
Date\_ 20181208  
Time 13.09  
INSTRUM spect  
PROBHD 5 mm PABBO BB/  
PULPROG zgpg30  
TD 65536  
SOLVENT CDCl3  
NS 159  
DS 0  
SWH 24038.461 Hz  
FIDRES 0.366798 Hz  
AQ 1.3631488 sec  
RG 196.92  
DW 20.800 usec  
DE 6.50 usec  
TE 296.6 K  
D1 2.0000000 sec  
D11 0.0300000 sec  
TD0 1

==== CHANNEL f1 =====  
SFO1 100.6228298 MHz  
NUC1 13C  
P1 9.70 usec  
PLW1 46.98899841 W

==== CHANNEL f2 =====  
SFO2 400.1316005 MHz  
NUC2 1H  
CPDPRG[2] waltz16  
PCPD2 90.00 usec  
PLW2 11.99499989 W  
PLW12 0.34213999 W  
PLW13 0.27713001 W

F2 - Processing parameters  
SI 32768  
SF 100.6127743 MHz  
WDW EM  
SSB 0  
LB 1.00 Hz  
GB 0  
PC 1.40



7.809  
7.791  
7.788  
7.485  
7.472  
7.467  
7.462  
7.448  
7.410  
7.391  
7.373  
7.260  
4.823  
4.811  
4.800  
4.789  
4.777  
4.767  
4.754  
4.049  
4.037  
4.021  
4.009  
3.806  
3.792  
3.778  
3.764  
3.452  
3.430  
3.425  
3.403  
3.345  
3.322  
3.318  
3.295  
3.087

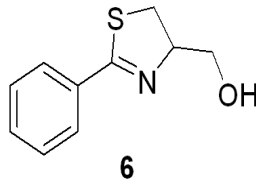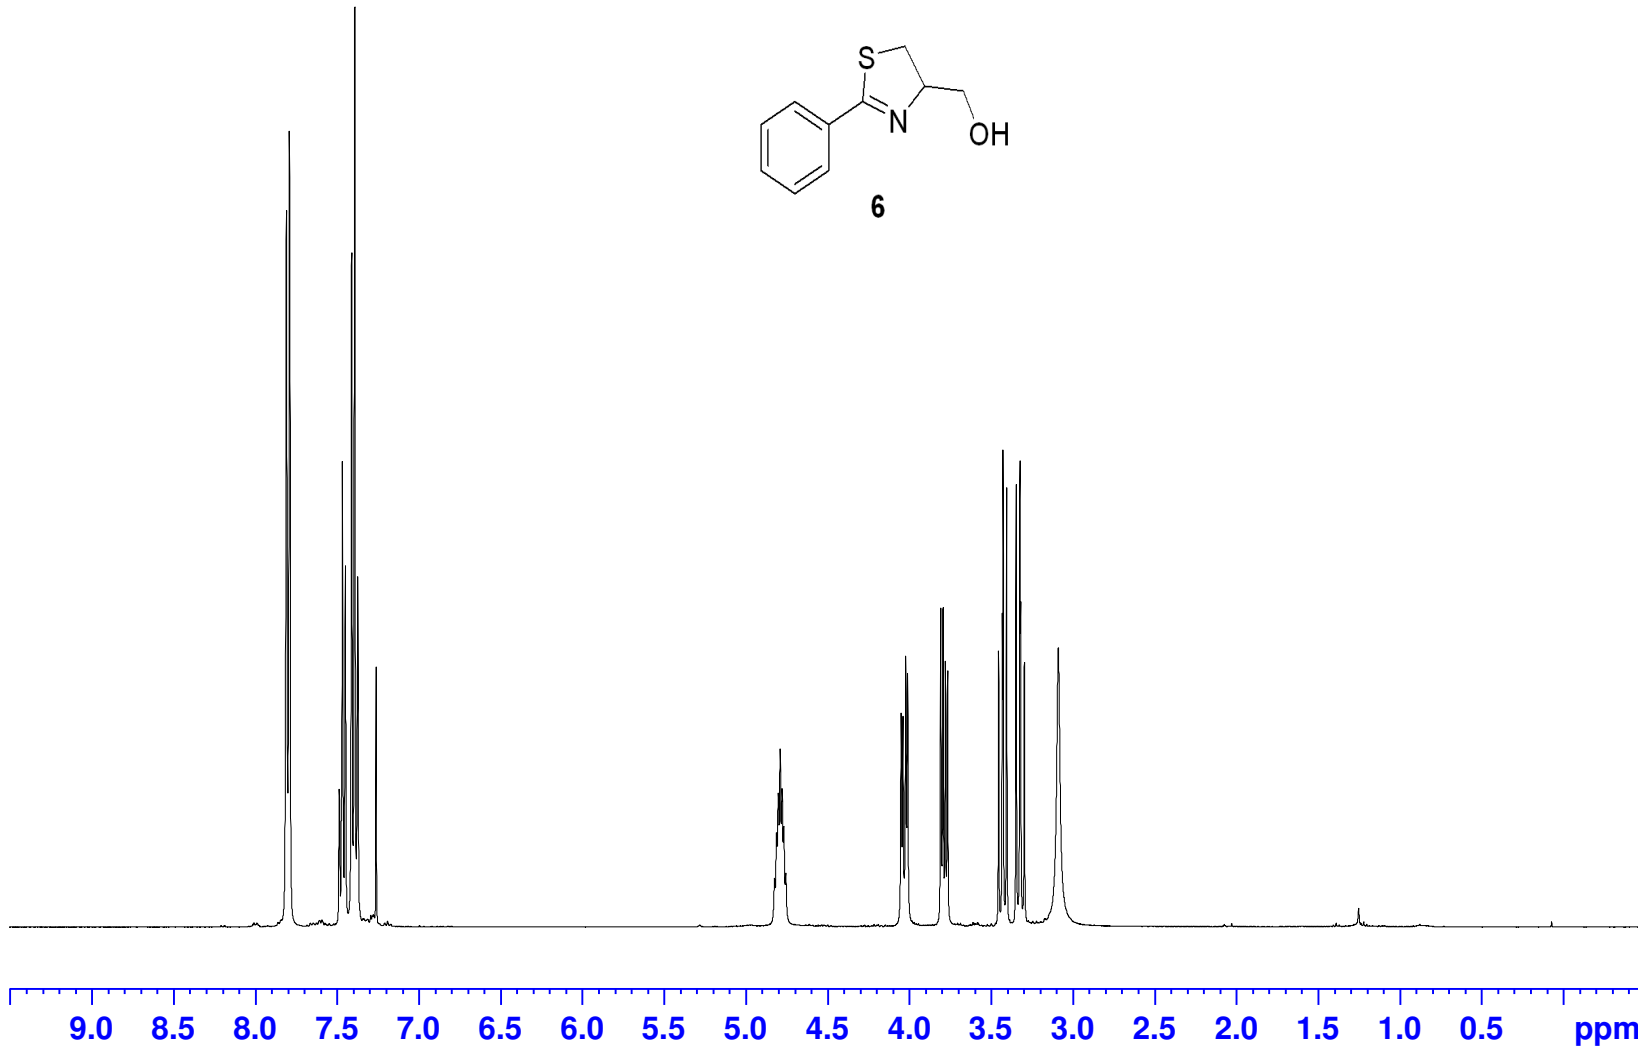

Current Data Parameters  
NAME hh-3-149-h-fr1  
EXPNO 1  
PROCNO 1

F2 - Acquisition Parameters  
Date\_ 20190704  
Time 15.43  
INSTRUM spect  
PROBHD 5 mm PABBO BB/  
PULPROG zg30  
TD 65536  
SOLVENT CDC13  
NS 10  
DS 0  
SWH 8012.820 Hz  
FIDRES 0.122266 Hz  
AQ 4.0894465 sec  
RG 103.52  
DW 62.400 usec  
DE 6.50 usec  
TE 295.4 K  
D1 1.00000000 sec  
TD0 1

==== CHANNEL f1 =====  
SFO1 400.1324710 MHz  
NUC1 1H  
P1 14.50 usec  
PLW1 11.99499989 W

F2 - Processing parameters  
SI 65536  
SF 400.1300101 MHz  
WDW EM  
SSB 0  
LB 0.30 Hz  
GB 0  
PC 1.00

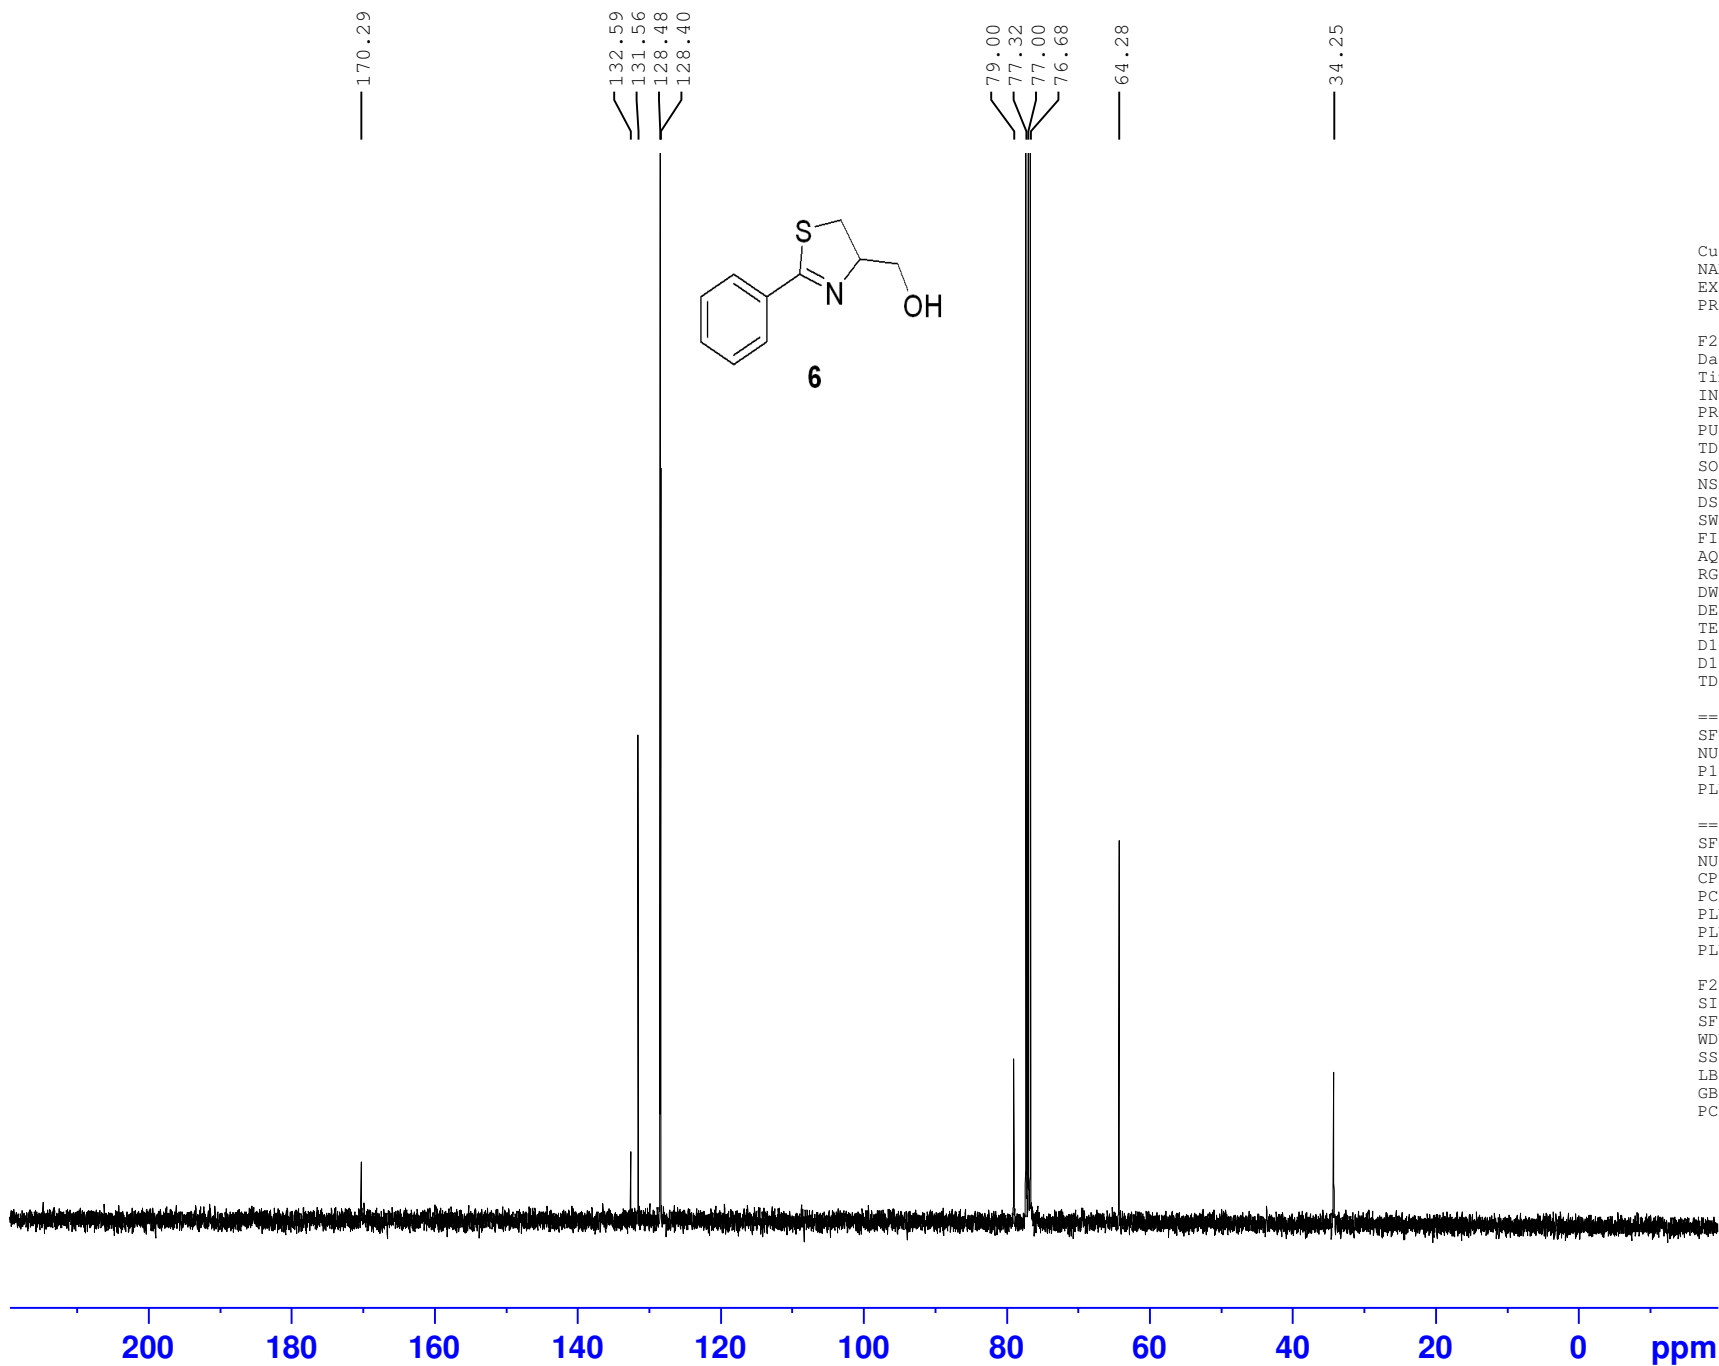

Current Data Parameters  
NAME hh-3-149-c-fr1  
EXPNO 4  
PROCNO 1

F2 - Acquisition Parameters  
Date\_ 20190704  
Time 15.56  
INSTRUM spect  
PROBHD 5 mm PABBO BB/  
PULPROG zgpg30  
TD 65536  
SOLVENT CDCl3  
NS 119  
DS 0  
SWH 24038.461 Hz  
FIDRES 0.366798 Hz  
AQ 1.3631488 sec  
RG 196.92  
DW 20.800 usec  
DE 6.50 usec  
TE 296.4 K  
D1 2.0000000 sec  
D11 0.03000000 sec  
TDO 1

==== CHANNEL f1 =====  
SFO1 100.6228298 MHz  
NUC1 13C  
P1 9.70 usec  
PLW1 46.98899841 W

==== CHANNEL f2 =====  
SFO2 400.1316005 MHz  
NUC2 1H  
CPDPRG[2] waltz16  
PCPD2 90.00 usec  
PLW2 11.99499989 W  
PLW12 0.34213999 W  
PLW13 0.27713001 W

F2 - Processing parameters  
SI 32768  
SF 100.6127751 MHz  
WDW EM  
SSB 0  
LB 1.00 Hz  
GB 0  
PC 1.40

7.899  
7.892  
7.889  
7.883  
7.396  
7.393  
7.377  
7.374  
7.366  
7.361  
7.355  
7.347  
7.343  
7.339  
7.331  
7.326  
7.323  
7.313  
7.309  
7.302  
7.298  
7.294  
7.286  
7.279  
7.275  
7.269  
7.260  
7.255  
6.959  
6.956  
6.949  
6.946  
6.940  
6.930  
4.336  
4.326  
4.309  
4.285  
4.181  
4.165  
3.686  
3.679  
3.657  
3.650  
3.330  
3.321  
3.301  
3.292

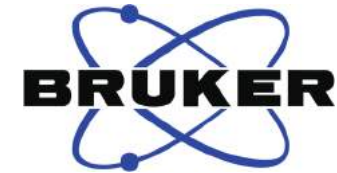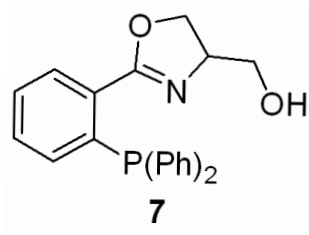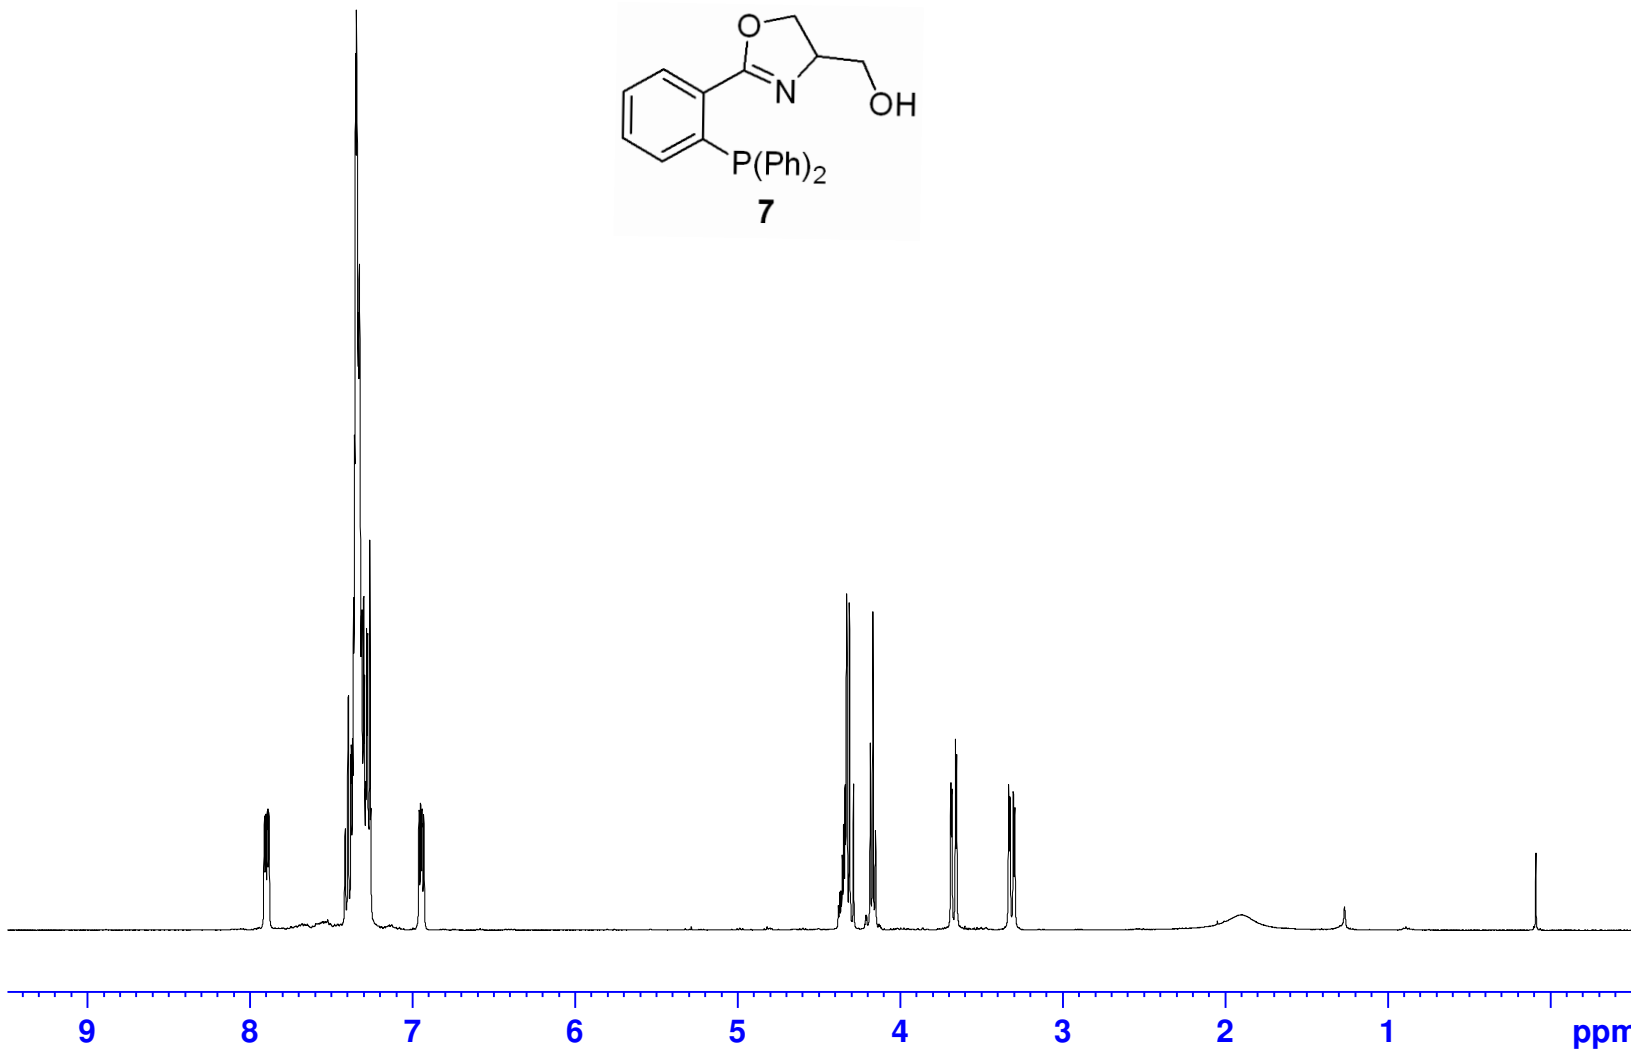

Current Data Parameters  
 NAME hh-2-160-h-fr1  
 EXPNO 2  
 PROCNO 1

F2 - Acquisition Parameters  
 Date\_ 20181229  
 Time 13.25  
 INSTRUM spect  
 PROBHD 5 mm PABBO BB/  
 PULPROG zg30  
 TD 65536  
 SOLVENT CDC13  
 NS 4  
 DS 0  
 SWH 8012.820 Hz  
 FIDRES 0.122266 Hz  
 AQ 4.0894465 sec  
 RG 39.46  
 DW 62.400 usec  
 DE 6.50 usec  
 TE 295.4 K  
 D1 1.00000000 sec  
 TD0 1

===== CHANNEL f1 =====  
 SFO1 400.1324710 MHz  
 NUC1 1H  
 P1 14.50 usec  
 PLW1 11.99499989 W

F2 - Processing parameters  
 SI 65536  
 SF 400.1300103 MHz  
 WDW EM  
 SSB 0  
 LB 0.30 Hz  
 GB 0  
 PC 1.00

S-192





164.45  
164.43  
138.92  
138.70  
138.35  
138.28  
137.46  
137.37  
134.39  
134.18  
133.39  
133.19  
131.51  
131.31  
130.70  
129.67  
129.64  
128.79  
128.66  
128.57  
128.50  
128.26

77.32  
77.20  
77.00  
76.68  
68.83  
68.43  
63.98

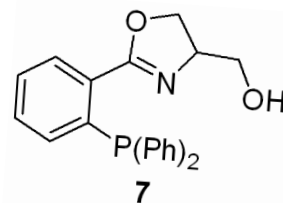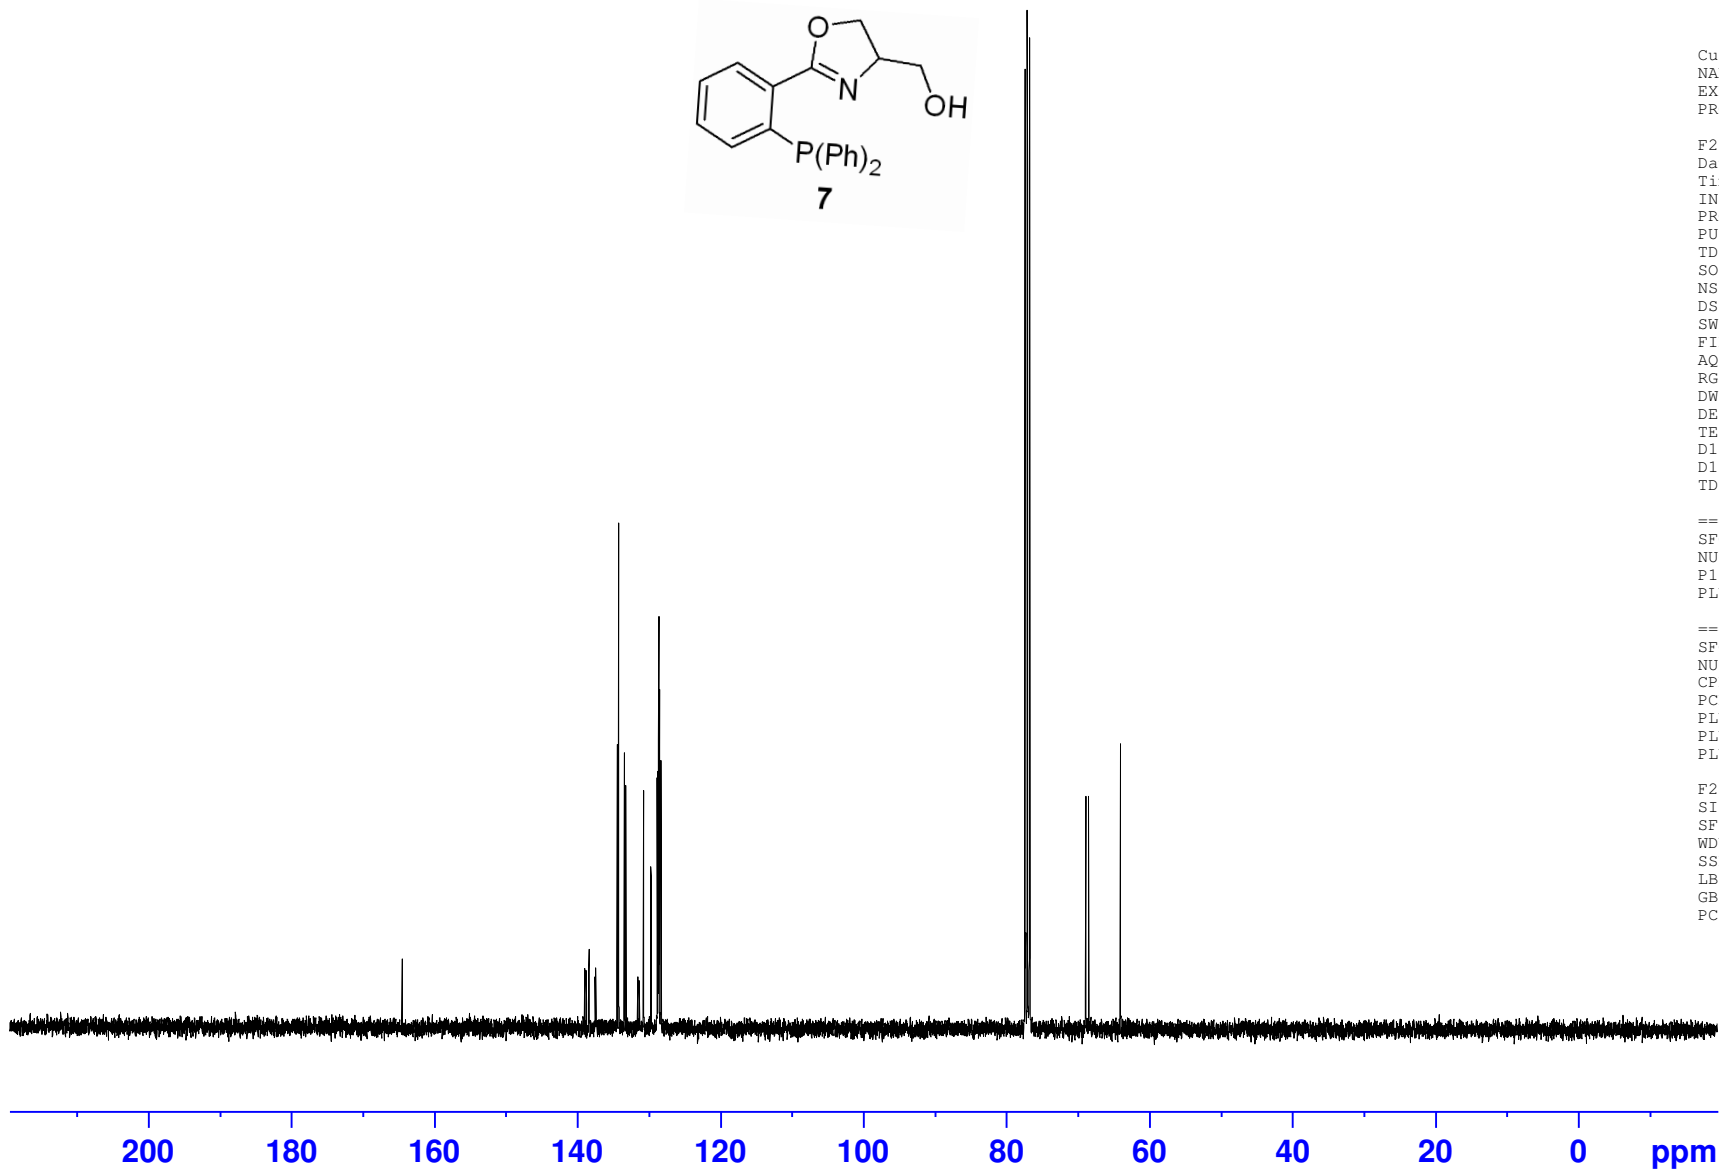

S-193

Current Data Parameters  
NAME hh-2-160-c-fr1  
EXPNO 1  
PROCNO 1

F2 - Acquisition Parameters  
Date\_ 20181228  
Time 21.23  
INSTRUM spect  
PROBHD 5 mm PABBO BB/  
PULPROG zgpg30  
TD 65536  
SOLVENT CDCl3  
NS 100  
DS 0  
SWH 24038.461 Hz  
FIDRES 0.366798 Hz  
AQ 1.3631488 sec  
RG 196.92  
DW 20.800 usec  
DE 6.50 usec  
TE 296.5 K  
D1 2.0000000 sec  
D11 0.0300000 sec  
TDO 1

==== CHANNEL f1 =====  
SFO1 100.6228298 MHz  
NUC1 13C  
P1 9.70 usec  
PLW1 46.98899841 W

==== CHANNEL f2 =====  
SFO2 400.1316005 MHz  
NUC2 1H  
CPDPRG[2] waltz16  
PCPD2 90.00 usec  
PLW2 11.99499989 W  
PLW12 0.34213999 W  
PLW13 0.27713001 W

F2 - Processing parameters  
SI 32768  
SF 100.6127766 MHz  
WDW EM  
SSB 0  
LB 1.00 Hz  
GB 0  
PC 1.40



Current Data Parameters  
NAME hh-2-160-p-frl  
EXPNO 1  
PROCNO 1

F2 - Acquisition Parameters  
Date\_ 20181229  
Time 13.28  
INSTRUM spect  
PROBHD 5 mm PABBO BB/  
PULPROG zgpg30  
TD 65536  
SOLVENT CDC13  
NS 1  
DS 0  
SWH 64102.563 Hz  
FIDRES 0.978127 Hz  
AQ 0.5111808 sec  
RG 196.92  
DW 7.800 usec  
DE 6.50 usec  
TE 295.4 K  
D1 2.0000000 sec  
D11 0.0300000 sec  
TD0 1

=====  
CHANNEL f1  
SFO1 161.9674942 MHz  
NUC1 31P  
P1 14.70 usec  
PLW1 11.99499989 W

=====  
CHANNEL f2  
SFO2 400.1316005 MHz  
NUC2 1H  
CPDPRG[2] waltz16  
PCPD2 90.00 usec  
PLW2 11.99499989 W  
PLW12 0.34213999 W  
PLW13 0.27713001 W

F2 - Processing parameters  
SI 32768  
SF 161.9755930 MHz  
WDW EM  
SSB 0  
LB 1.00 Hz  
GB 0  
PC 1.40

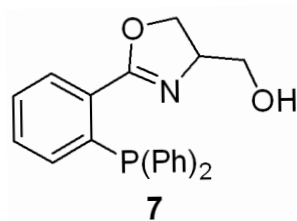

-6.59

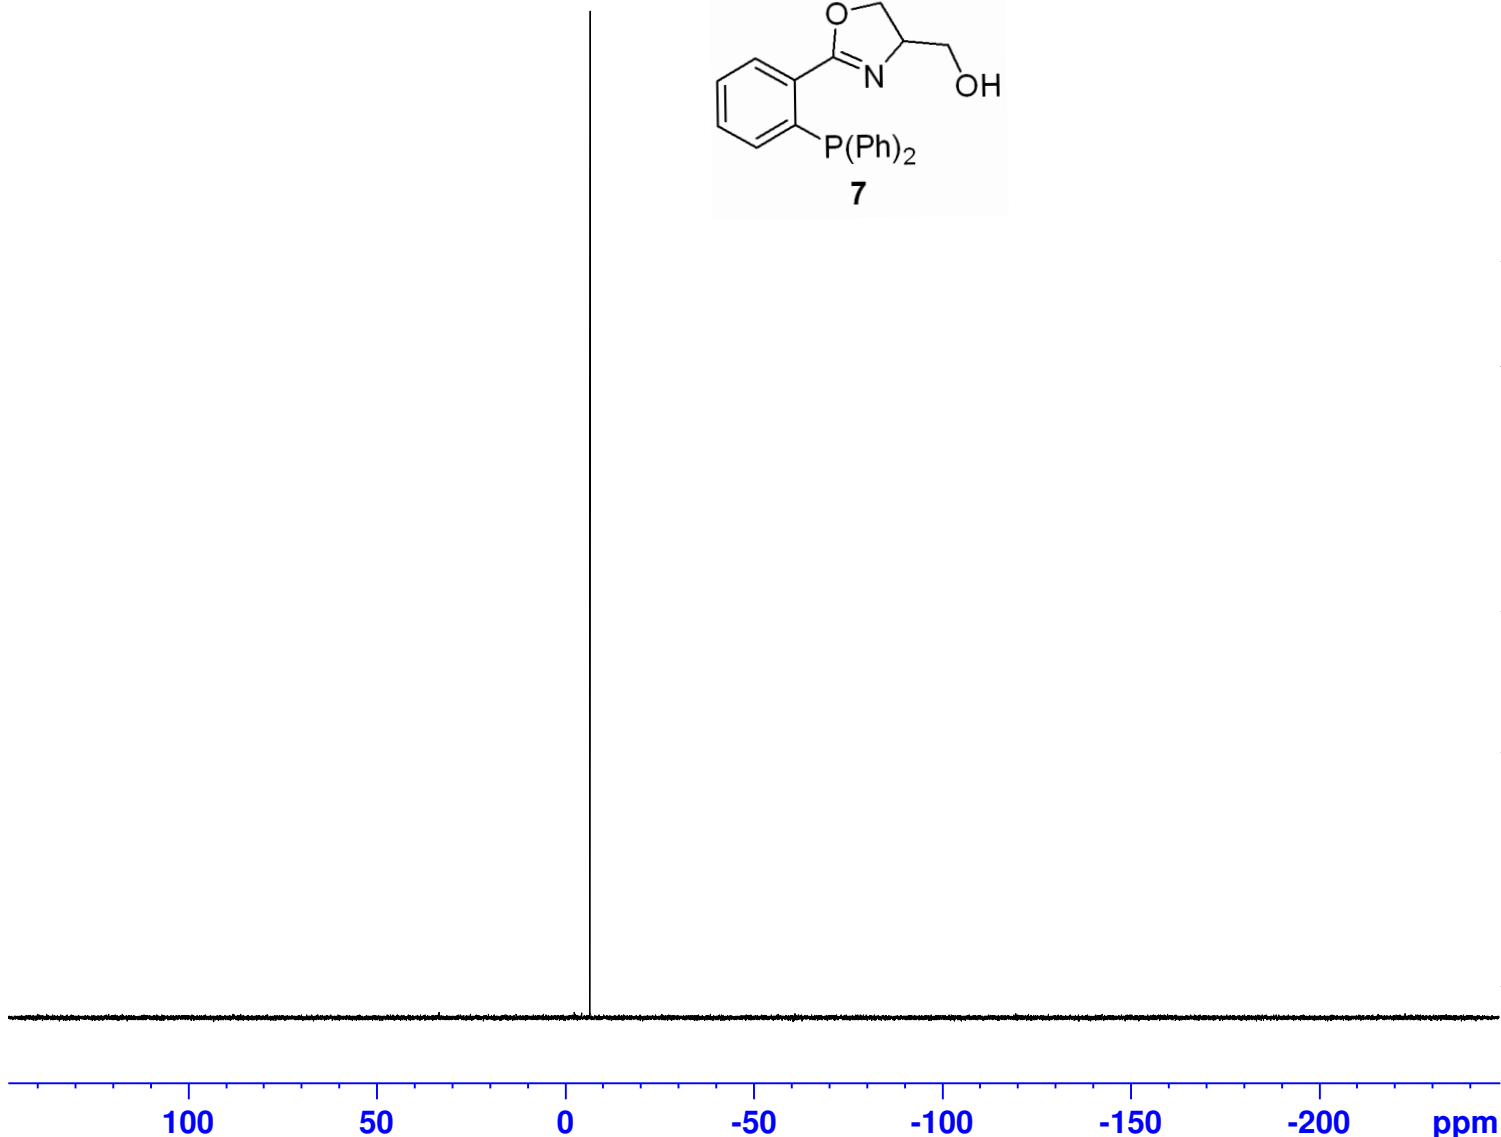

S-194



7.310  
7.308  
7.295  
7.286  
7.278  
7.274  
7.260  
7.251  
7.241  
7.239  
7.234  
7.229  
7.225  
7.221  
7.218  
7.213  
7.207  
7.190  
6.511  
6.472  
6.372  
6.350  
6.332  
6.311  
4.283  
4.277  
4.256  
3.982  
3.955  
3.761  
3.712  
3.526

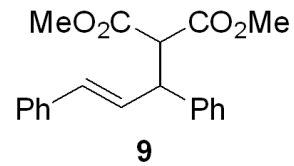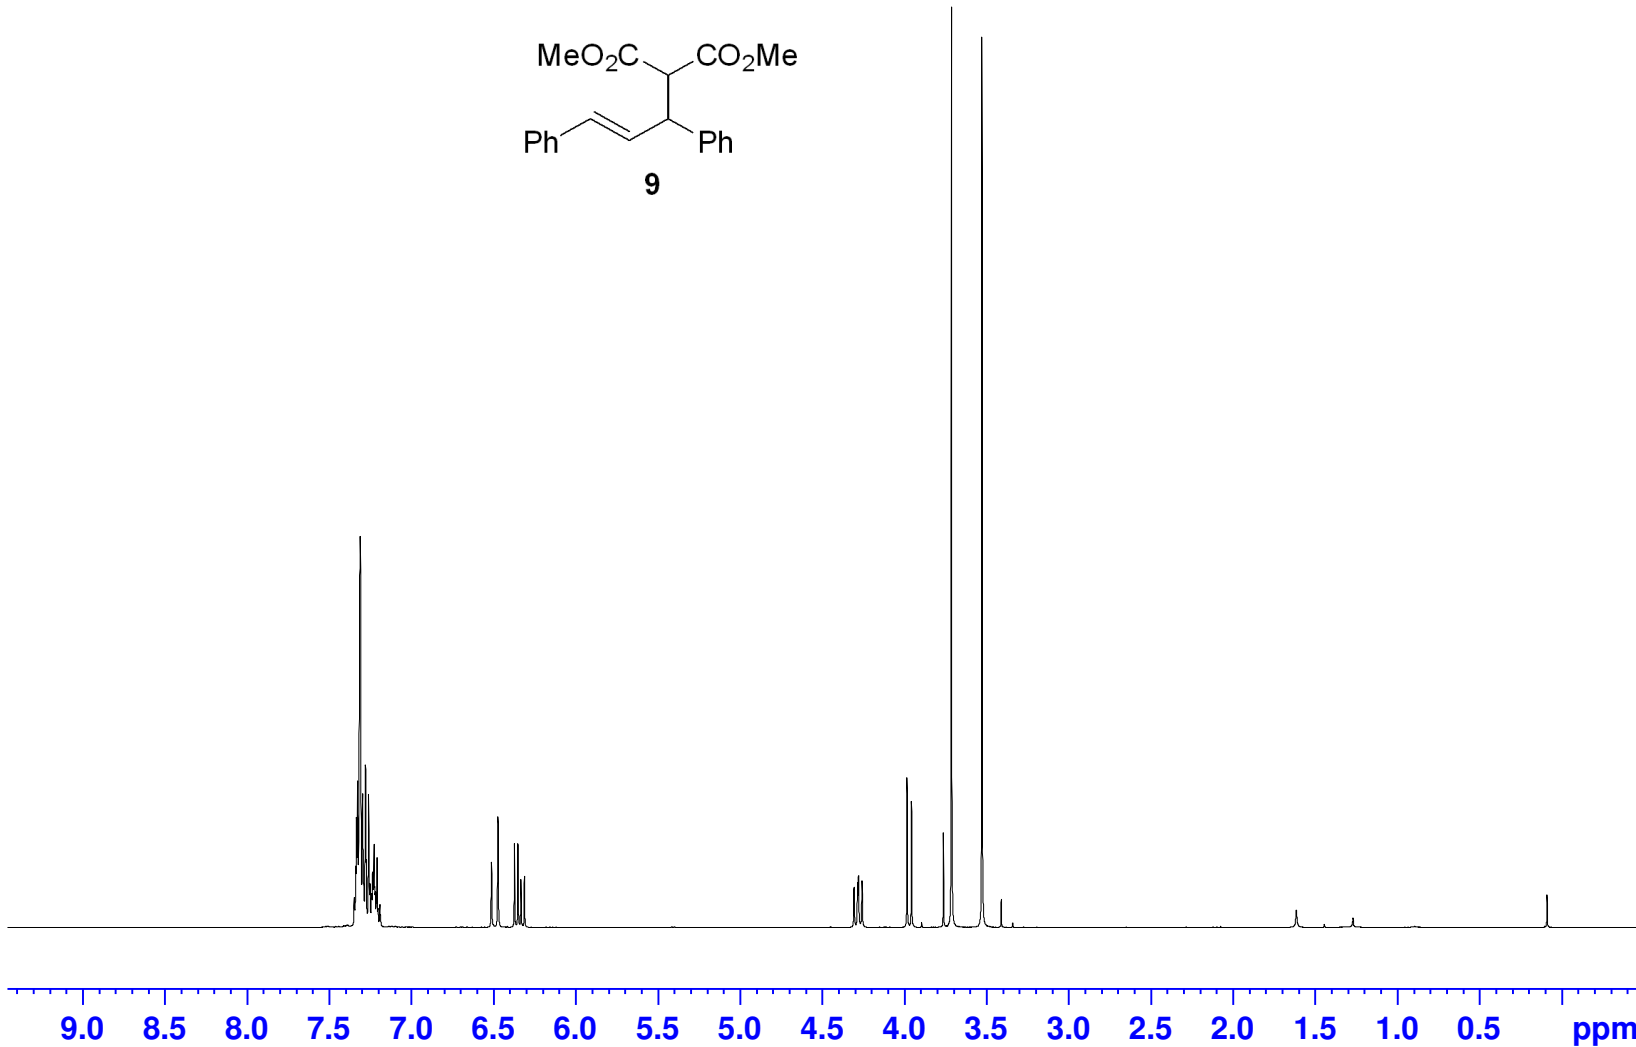

Current Data Parameters  
NAME hh-2-185-h-fr1  
EXPNO 1  
PROCNO 1

F2 - Acquisition Parameters  
Date\_ 20190109  
Time 16.08  
INSTRUM spect  
PROBHD 5 mm PABBO BB/  
PULPROG zg30  
TD 65536  
SOLVENT CDC13  
NS 6  
DS 0  
SWH 8012.820 Hz  
FIDRES 0.122266 Hz  
AQ 4.0894465 sec  
RG 70.97  
DW 62.400 usec  
DE 6.50 usec  
TE 295.4 K  
D1 1.00000000 sec  
TD0 1

==== CHANNEL f1 =====  
SFO1 400.1324710 MHz  
NUC1 1H  
P1 14.50 usec  
PLW1 11.99499989 W

F2 - Processing parameters  
SI 65536  
SF 400.1300102 MHz  
WDW EM  
SSB 0  
LB 0.30 Hz  
GB 0  
PC 1.00



168.16  
167.74

140.12  
136.77  
131.79  
129.06  
128.69  
128.44  
127.83  
127.54  
127.13  
126.35

77.31  
77.00  
76.68

57.60  
52.60  
52.42  
49.16

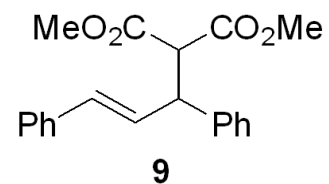

Current Data Parameters  
NAME hh-2-185-c-fr1  
EXPNO 1  
PROCNO 1

F2 - Acquisition Parameters  
Date\_ 20190109  
Time 20.11  
INSTRUM spect  
PROBHD 5 mm PABBO BB/  
PULPROG zgpg30  
TD 65536  
SOLVENT CDCl3  
NS 66  
DS 0  
SWH 24038.461 Hz  
FIDRES 0.366798 Hz  
AQ 1.3631488 sec  
RG 196.92  
DW 20.800 usec  
DE 6.50 usec  
TE 296.1 K  
D1 2.0000000 sec  
D11 0.0300000 sec  
TDO 1

==== CHANNEL f1 =====  
SFO1 100.6228298 MHz  
NUC1 13C  
P1 9.70 usec  
PLW1 46.98899841 W

==== CHANNEL f2 =====  
SFO2 400.1316005 MHz  
NUC2 1H  
PCPD2 waltz16  
PCPD2 90.00 usec  
PLW2 11.99499989 W  
PLW12 0.34213999 W  
PLW13 0.27713001 W

F2 - Processing parameters  
SI 32768  
SF 100.6127758 MHz  
WDW EM  
SSB 0  
LB 1.00 Hz  
GB 0  
PC 1.40

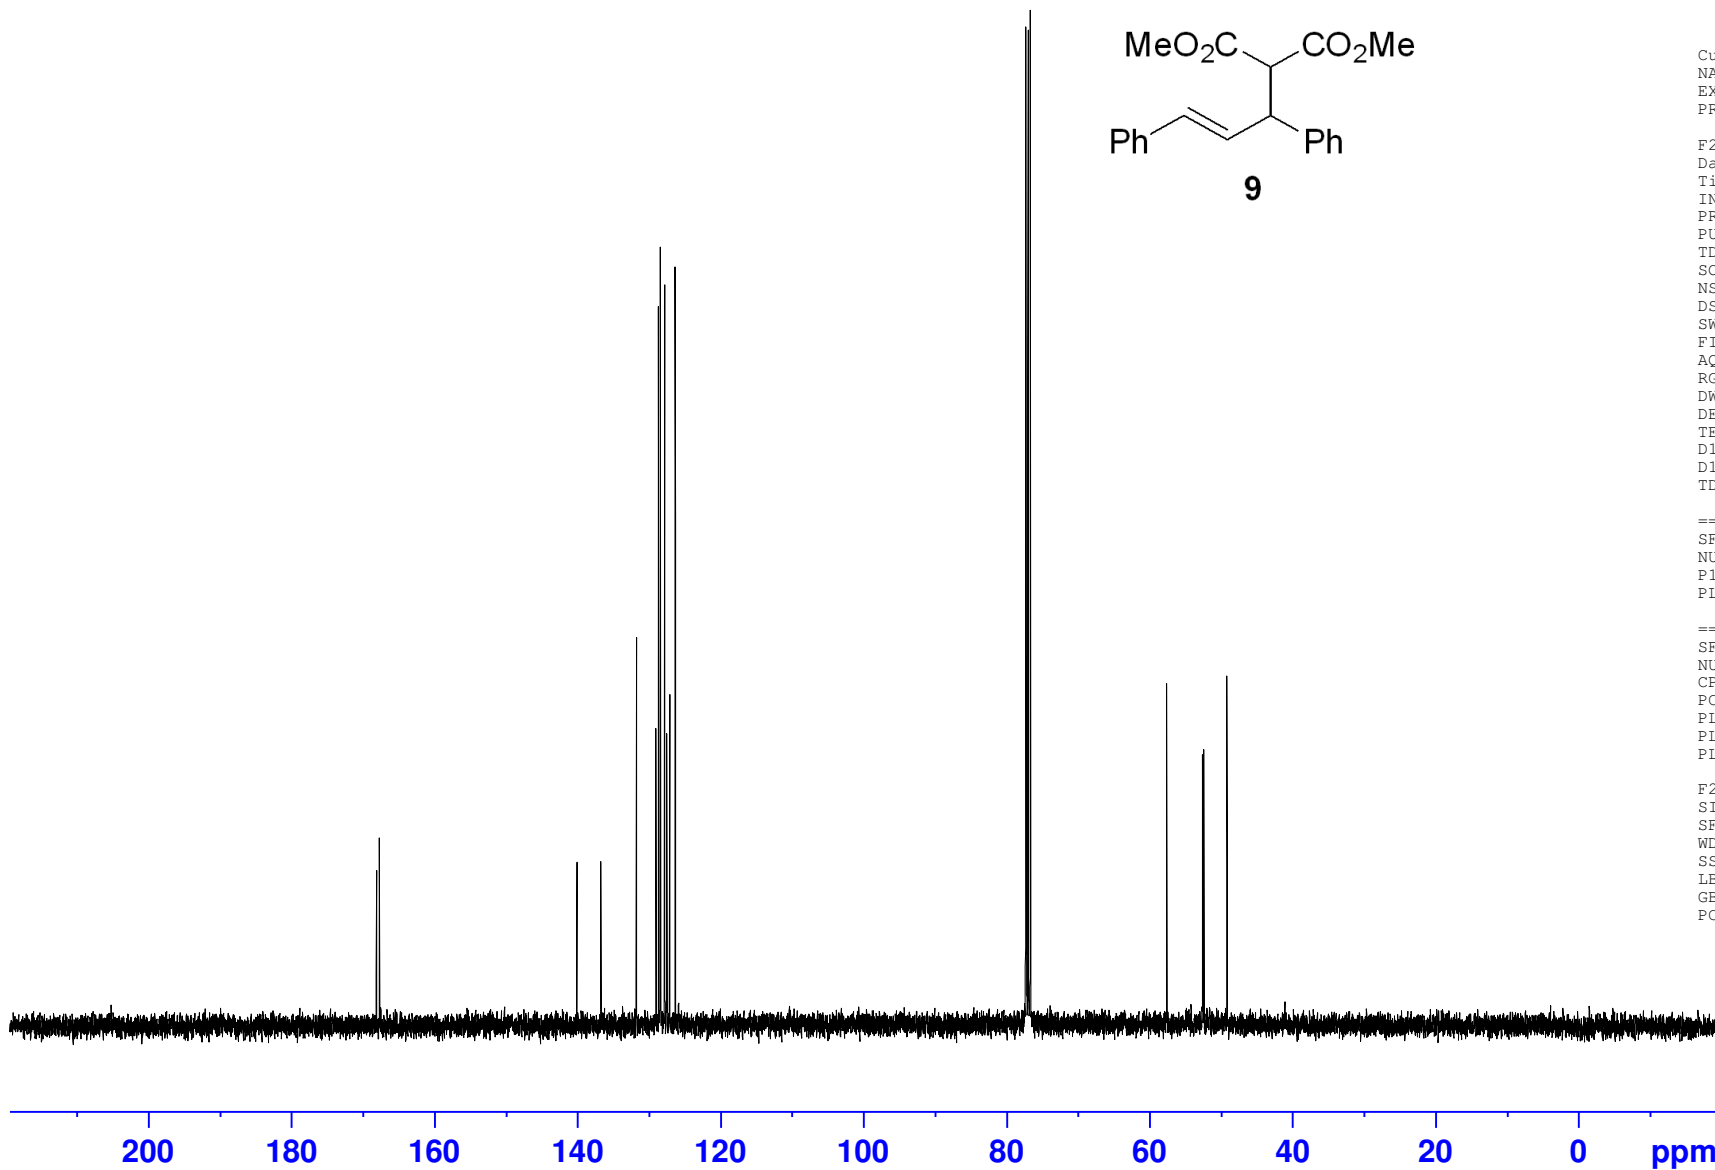



7.520  
7.503  
7.333  
7.314  
7.260  
7.144  
7.126  
7.107  
3.960  
3.834  
3.824  
3.810  
3.800  
3.753  
3.731  
3.720  
3.709  
3.698  
3.687  
3.331  
3.308  
3.285  
3.263  
3.244  
3.081  
3.069  
3.049  
3.042  
3.022  
2.992  
2.970  
2.953  
2.931  
2.695  
2.668  
2.644  
2.617  
2.260  
2.242  
2.231  
2.212  
1.027

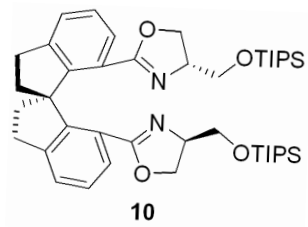

Current Data Parameters  
NAME hh-3-38-h-fr1  
EXPNO 2  
PROCNO 1

F2 - Acquisition Parameters  
Date\_ 20190215  
Time 19.59  
INSTRUM spect  
PROBHD 5 mm PABBO BB/  
PULPROG zg30  
TD 65536  
SOLVENT CDC13  
NS 6  
DS 0  
SWH 8012.820 Hz  
FIDRES 0.122266 Hz  
AQ 4.0894465 sec  
RG 82.92  
DW 62.400 usec  
DE 6.50 usec  
TE 296.2 K  
D1 1.00000000 sec  
TD0 1

==== CHANNEL f1 =====  
SFO1 400.1324710 MHz  
NUC1 1H  
P1 14.50 usec  
PLW1 11.99499989 W

F2 - Processing parameters  
SI 65536  
SF 400.1300102 MHz  
WDW EM  
SSB 0  
LB 0.30 Hz  
GB 0  
PC 1.00

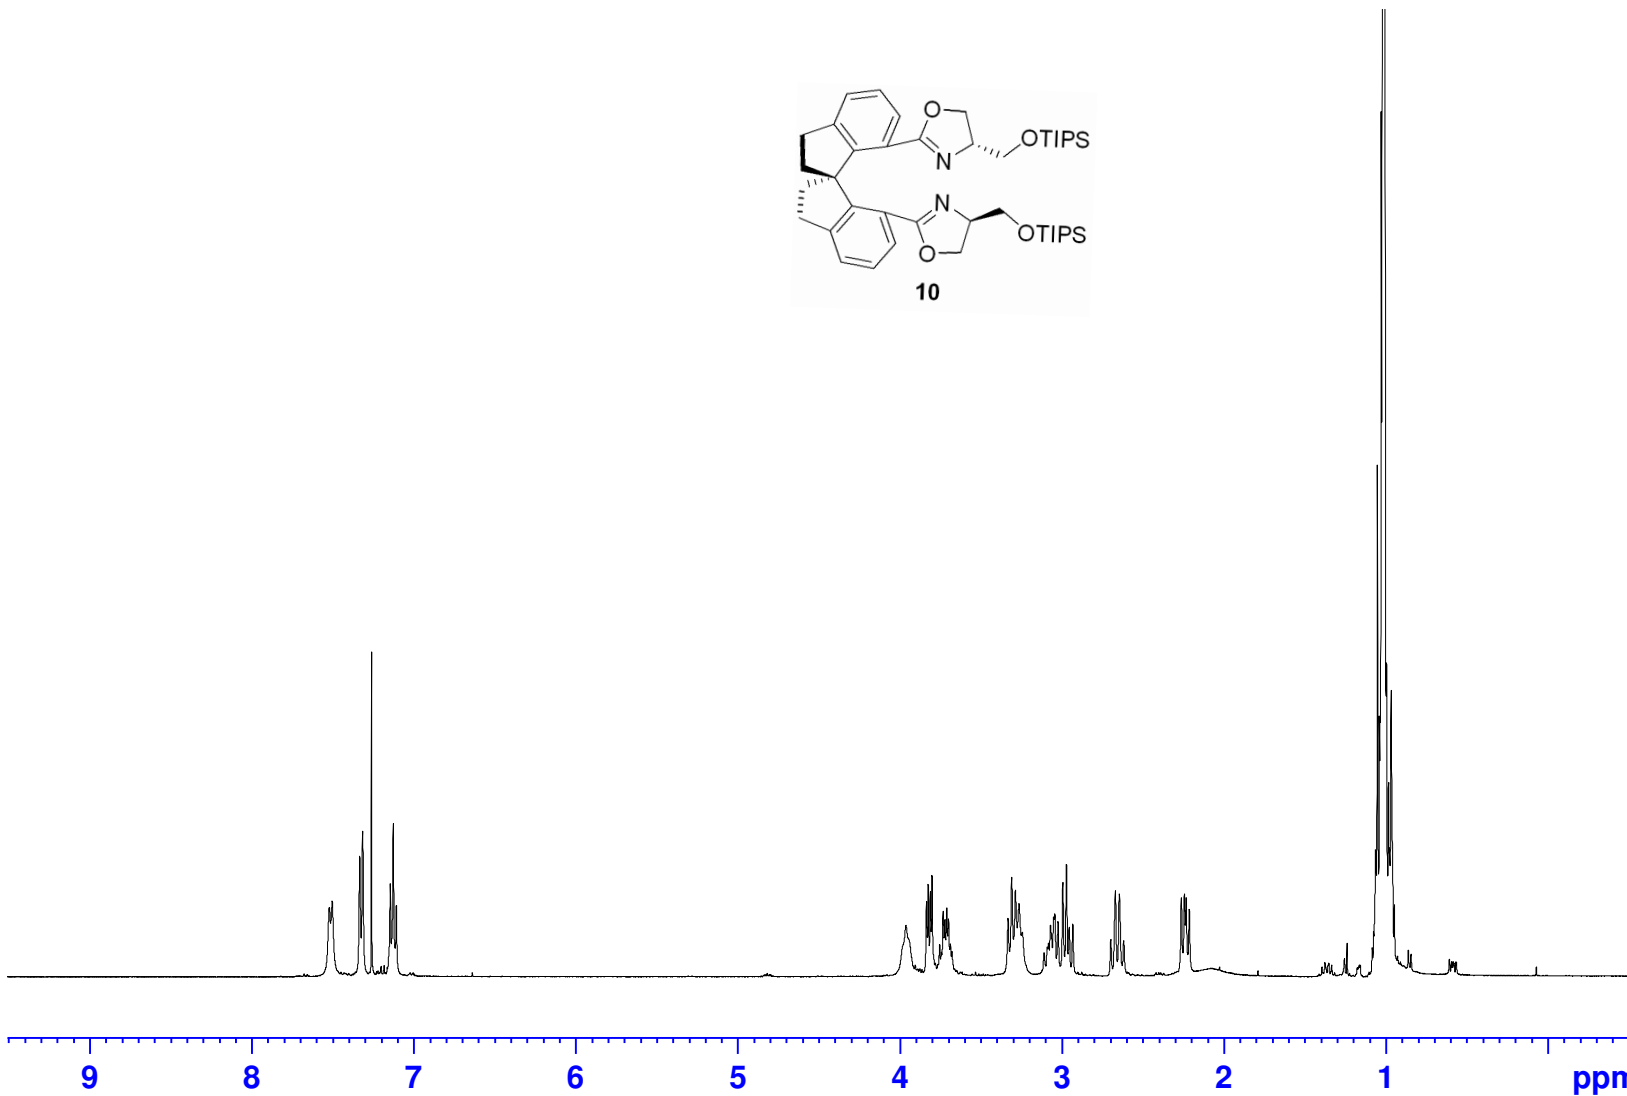

1.77  
1.94  
1.94

1.75  
1.89  
2.09  
3.68  
4.14  
2.00  
2.04

42.87

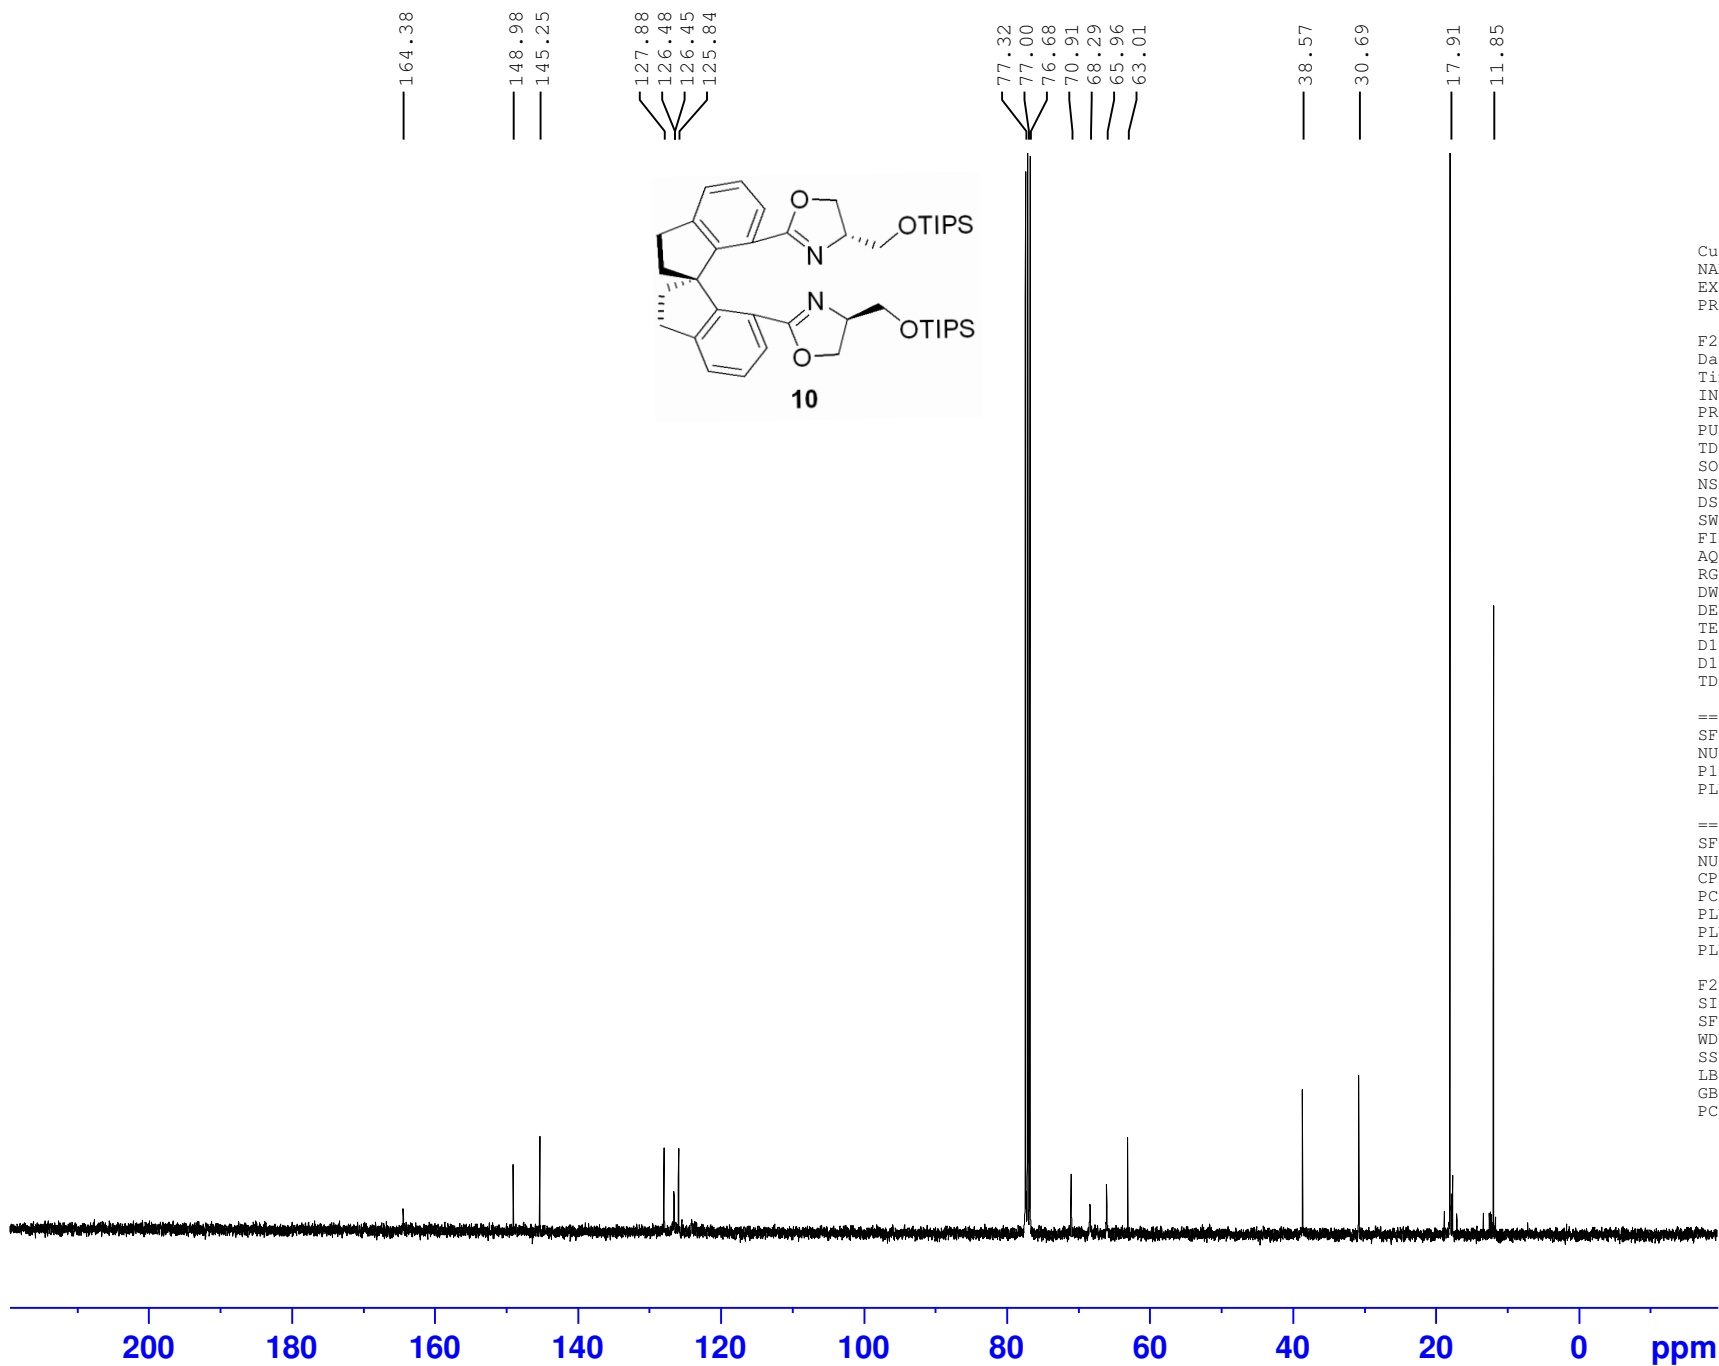

Current Data Parameters  
NAME hh-3-38-c-fr1  
EXPNO 2  
PROCNO 1

F2 - Acquisition Parameters  
Date\_ 20190216  
Time 12.50  
INSTRUM spect  
PROBHD 5 mm PABBO BB/  
PULPROG zgpg30  
TD 65536  
SOLVENT CDCl3  
NS 426  
DS 0  
SWH 24038.461 Hz  
FIDRES 0.366798 Hz  
AQ 1.3631488 sec  
RG 196.92  
DW 20.800 usec  
DE 6.50 usec  
TE 297.5 K  
D1 2.0000000 sec  
D11 0.0300000 sec  
TDO 1

=====  
CHANNEL f1  
SFO1 100.6228298 MHz  
NUC1 13C  
P1 9.70 usec  
PLW1 46.98899841 W

=====  
CHANNEL f2  
SFO2 400.1316005 MHz  
NUC2 1H  
PCPD2 waltz16  
PLW2 90.00 usec  
PLW12 11.99499989 W  
PLW13 0.34213999 W  
PLW13 0.27713001 W

F2 - Processing parameters  
SI 32768  
SF 100.6127714 MHz  
WDW EM  
SSB 0  
LB 1.00 Hz  
GB 0  
PC 1.40

7.369  
7.366  
7.348  
7.346  
7.288  
7.283  
7.269  
7.258  
7.249  
7.176  
7.158  
7.140

5.044  
5.028  
5.013  
4.997  
4.981

— 3.478

1.282  
1.267  
1.240  
1.224  
0.931  
0.911  
0.892  
0.626  
0.622  
0.608  
0.602  
0.588  
0.582

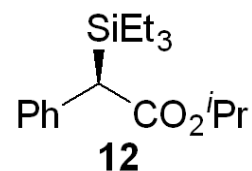

Current Data Parameters  
NAME hh-3-97B-h-fr1  
EXPNO 1  
PROCNO 1

F2 - Acquisition Parameters  
Date\_ 20190413  
Time 19.11  
INSTRUM spect  
PROBHD 5 mm PABBO BB/  
PULPROG zg30  
TD 65536  
SOLVENT CDCl3  
NS 4  
DS 0  
SWH 8012.820 Hz  
FIDRES 0.122266 Hz  
AQ 4.0894465 sec  
RG 70.97  
DW 62.400 usec  
DE 6.50 usec  
TE 297.8 K  
D1 1.00000000 sec  
TD0 1

==== CHANNEL f1 =====  
SFO1 400.1324710 MHz  
NUC1 1H  
P1 14.50 usec  
PLW1 11.99499989 W

F2 - Processing parameters  
SI 65536  
SF 400.1300109 MHz  
WDW EM  
SSB 0  
LB 0.30 Hz  
GB 0  
PC 1.00

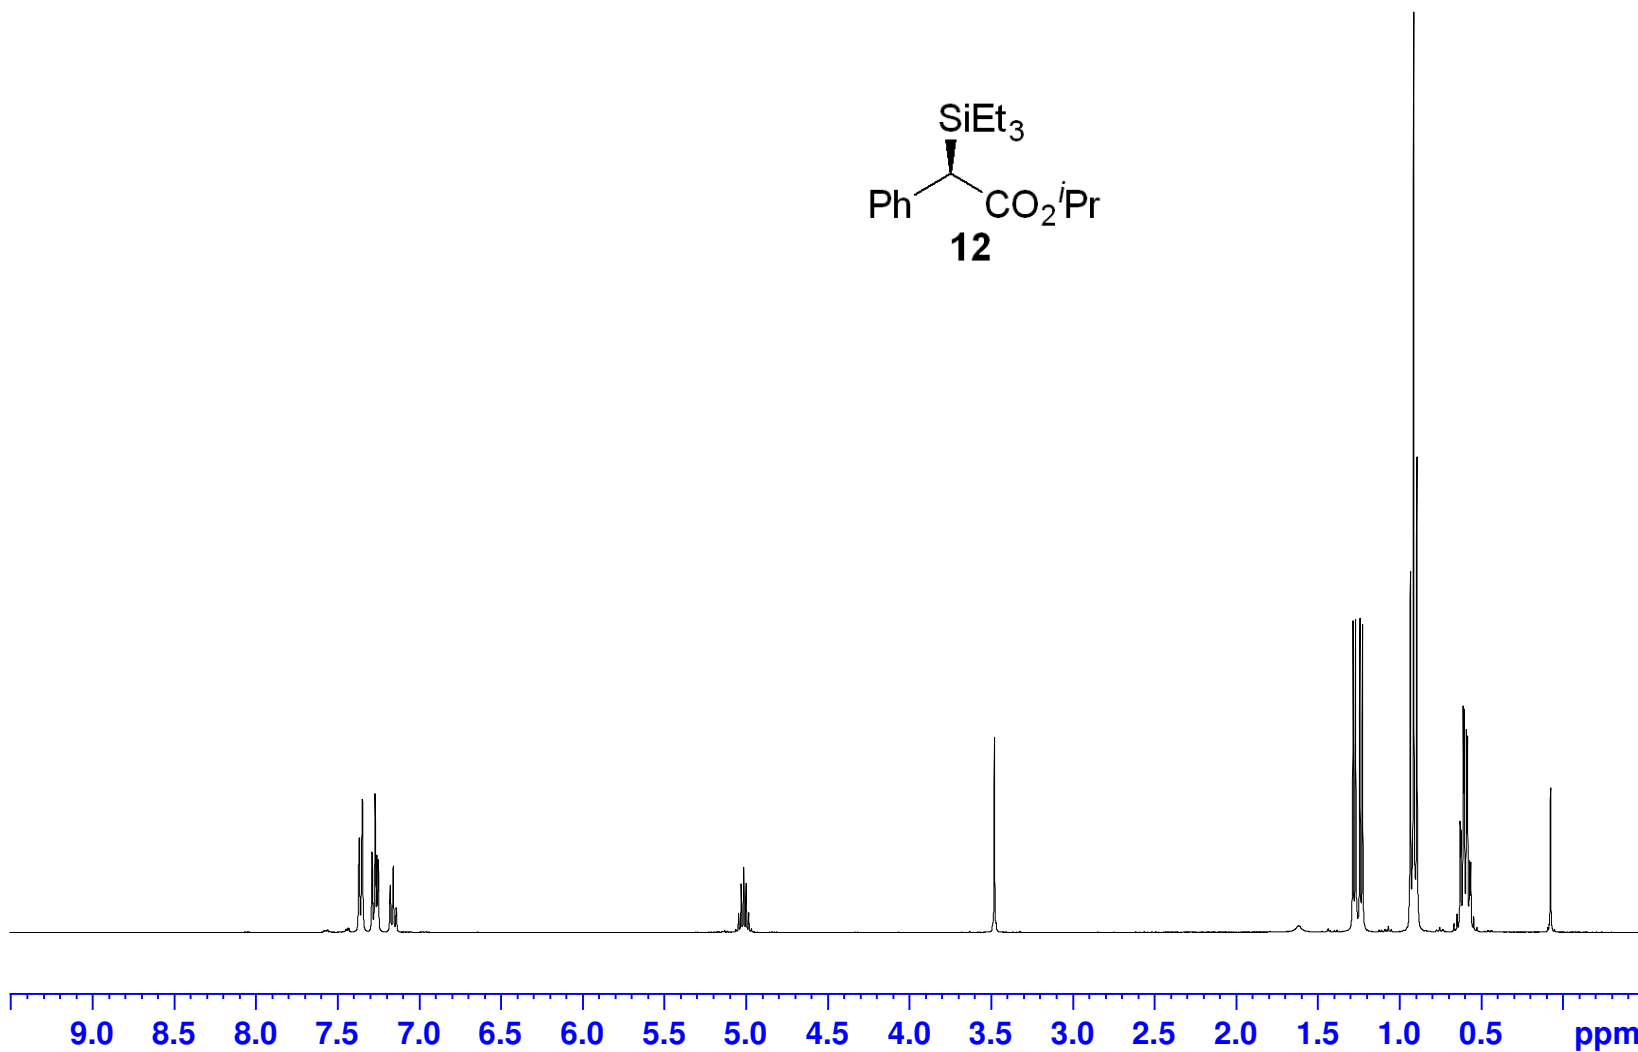

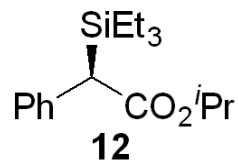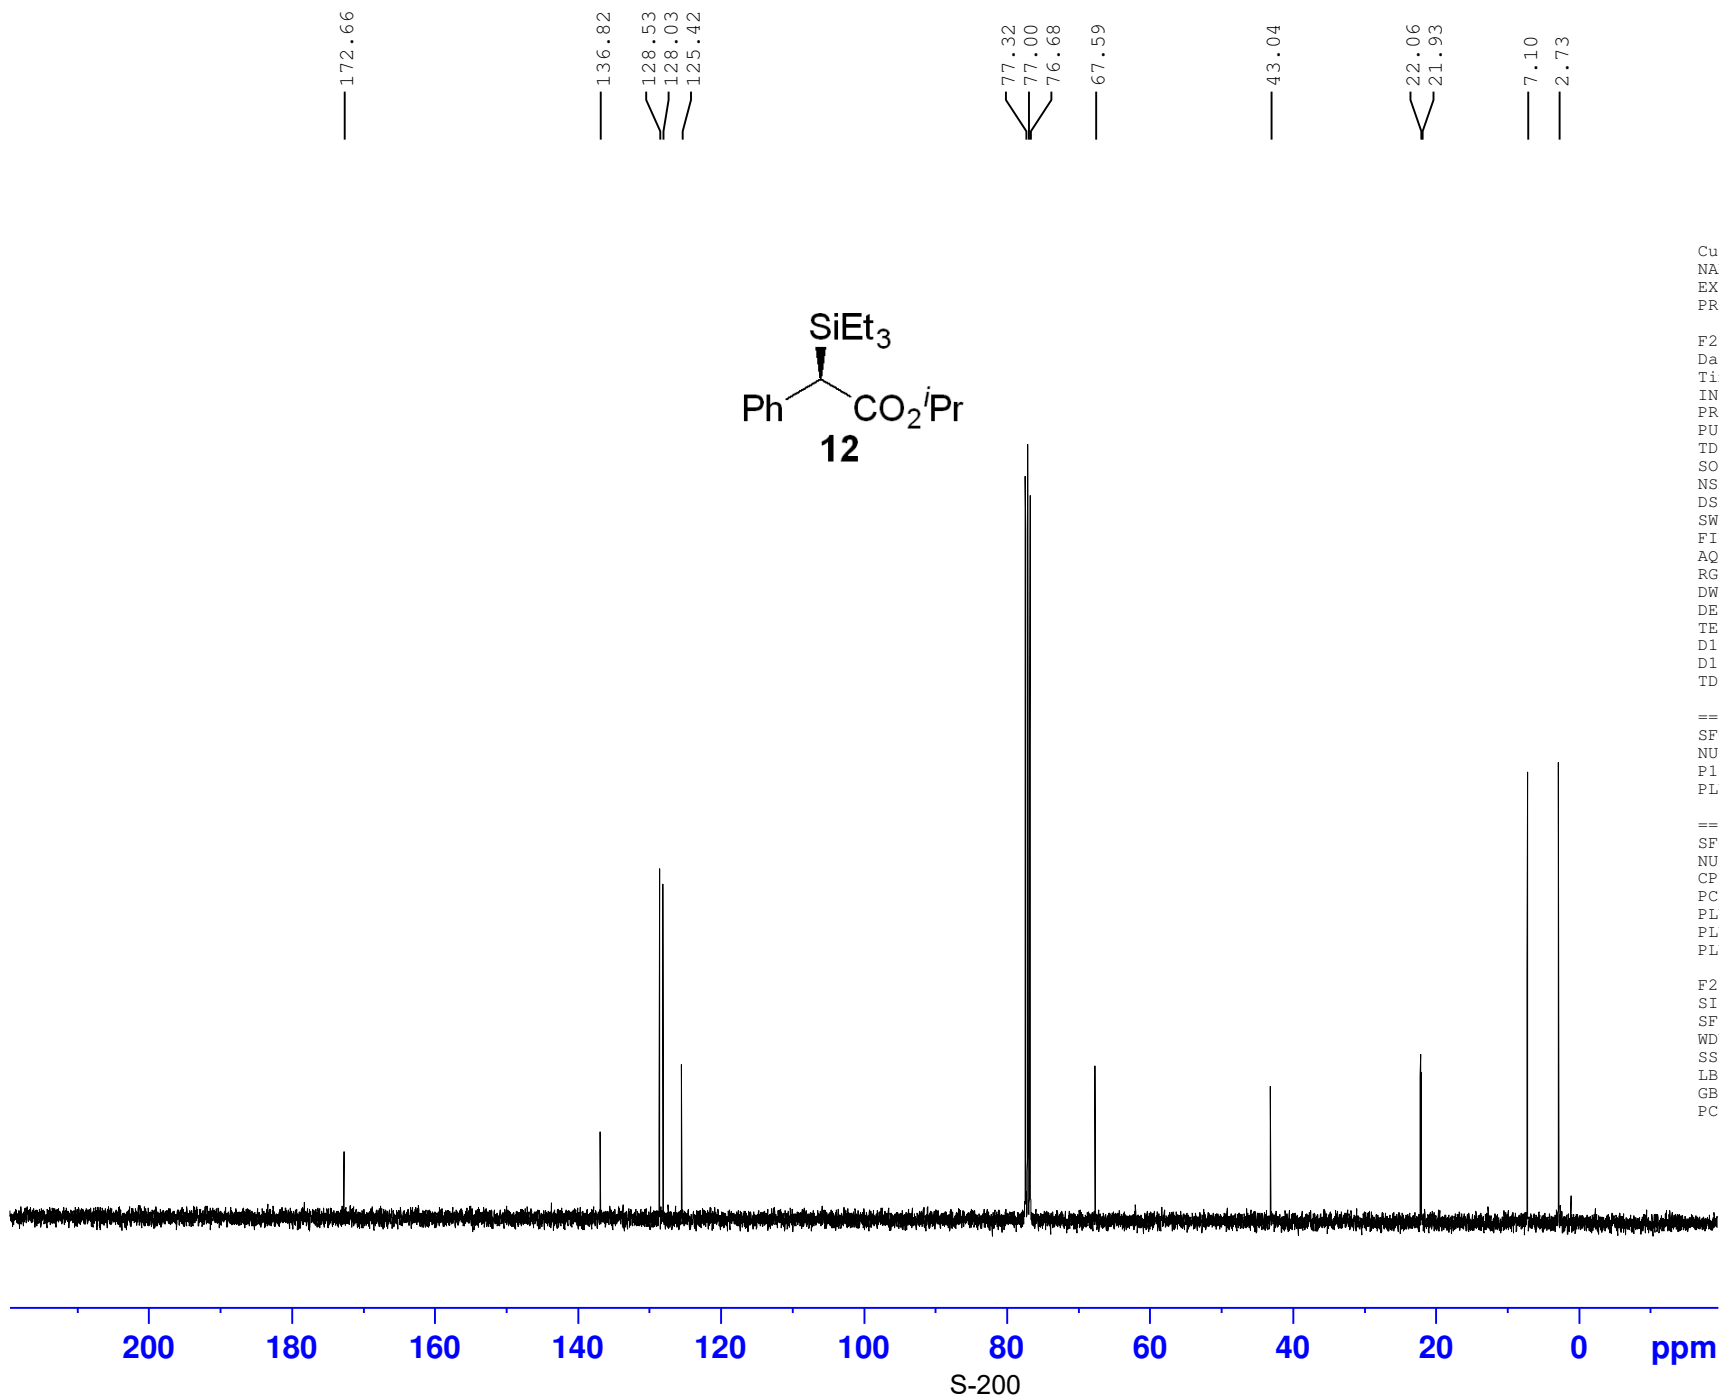

Current Data Parameters  
NAME hh-3-97B-c-fr1  
EXPNO 2  
PROCNO 1

F2 - Acquisition Parameters  
Date\_ 20190413  
Time 19.15  
INSTRUM spect  
PROBHD 5 mm PABBO BB/  
PULPROG zgpg30  
TD 65536  
SOLVENT CDCl3  
NS 63  
DS 0  
SWH 24038.461 Hz  
FIDRES 0.366798 Hz  
AQ 1.3631488 sec  
RG 196.92  
DW 20.800 usec  
DE 6.50 usec  
TE 298.7 K  
D1 2.0000000 sec  
D11 0.0300000 sec  
TD0 1

==== CHANNEL f1 =====  
SFO1 100.6228298 MHz  
NUC1 13C  
P1 9.70 usec  
PLW1 46.98899841 W

==== CHANNEL f2 =====  
SFO2 400.1316005 MHz  
NUC2 1H  
PCPDG[2] waltz16  
PCPD2 90.00 usec  
PLW2 11.99499989 W  
PLW12 0.34213999 W  
PLW13 0.27713001 W

F2 - Processing parameters  
SI 32768  
SF 100.6127715 MHz  
WDW EM  
SSB 0  
LB 1.00 Hz  
GB 0  
PC 1.40





Current Data Parameters  
NAME hh-1-6-h-frl  
EXPNO 7  
PROCNO 1

F2 - Acquisition Parameters  
Date\_ 20190624  
Time 8.49  
INSTRUM spect  
PROBHD 5 mm PABBO BB-  
PULPROG zg30  
TD 32768  
SOLVENT CDCl3  
NS 8  
DS 2  
SWH 8012.820 Hz  
FIDRES 0.244532 Hz  
AQ 2.0447233 sec  
RG 100.49  
DW 62.400 usec  
DE 6.50 usec  
TE 295.4 K  
D1 1.00000000 sec  
TD0 1

==== CHANNEL f1 =====  
NUC1 1H  
P1 9.90 usec  
PLW1 23.00000000 W  
SFO1 400.1932015 MHz

F2 - Processing parameters  
SI 65536  
SF 400.1900151 MHz  
WDW EM  
SSB 0  
LB 0.30 Hz  
GB 0  
PC 0.50

7.66  
7.65  
7.64  
7.63  
7.39  
7.39  
7.37  
7.37  
7.37  
7.35  
7.26  
7.01  
7.00  
6.98  
6.89  
6.89  
6.87  
6.85  
6.85  
4.49  
4.48  
4.48  
4.47  
4.46  
4.44  
4.44  
4.37  
4.35  
4.34  
4.33  
4.32  
4.32  
3.89  
3.88  
3.86  
3.85  
3.85  
3.70  
3.70  
3.69  
3.67  
3.66

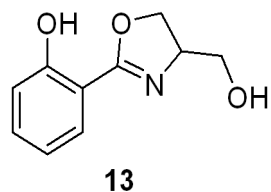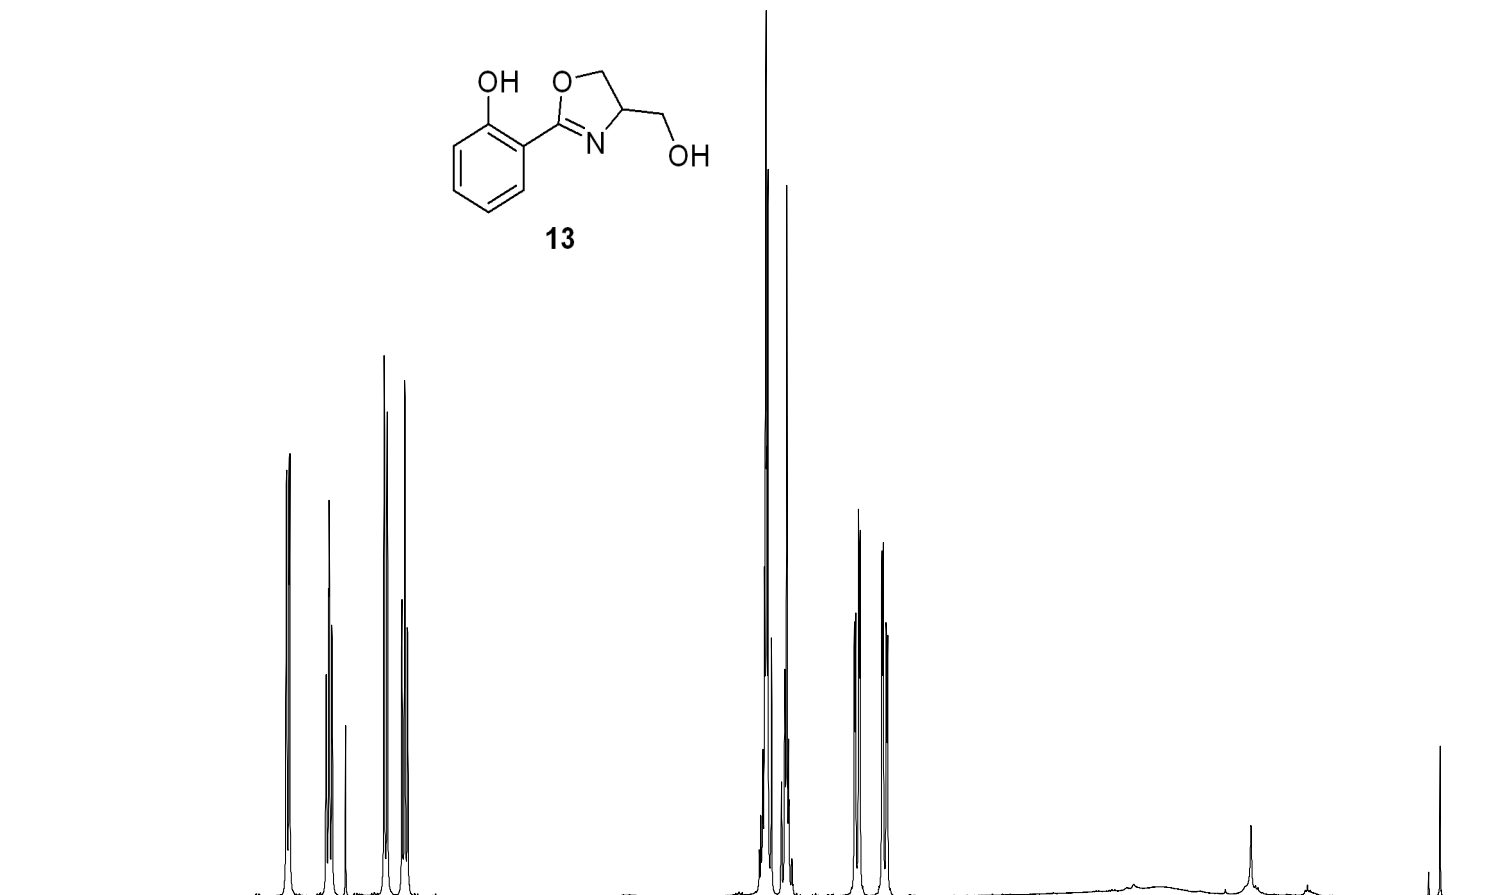

9.0 8.5 8.0 7.5 7.0 6.5 6.0 5.5 5.0 4.5 4.0 3.5 3.0 2.5 2.0 1.5 1.0 0.5 ppm

1.00  
1.02  
1.01  
1.03

2.14  
1.07  
1.08  
1.07



Current Data Parameters  
NAME hh-1-6-c-frl  
EXPNO 8  
PROCNO 1

F2 - Acquisition Parameters  
Date\_ 20190624  
Time 8.54  
INSTRUM spect  
PROBHD 5 mm PABBO BB-  
PULPROG zgpg30  
TD 65536  
SOLVENT CDC13  
NS 31  
DS 4  
SWH 24038.461 Hz  
FIDRES 0.366798 Hz  
AQ 1.3631488 sec  
RG 193.13  
DW 20.800 usec  
DE 6.50 usec  
TE 295.8 K  
D1 2.0000000 sec  
D11 0.0300000 sec  
TD0 1

=====  
CHANNEL f1  
NUC1 13C  
P1 9.90 usec  
PLW1 53.0000000 W  
SFO1 100.6379178 MHz

=====  
CHANNEL f2  
CPDPRG[2] waltz16  
NUC2 1H  
PCPD2 90.00 usec  
PLW2 14.0000000 W  
PLW12 0.35839999 W  
PLW13 0.29030001 W  
SFO2 400.1916008 MHz

F2 - Processing parameters  
SI 32768  
SF 100.6278646 MHz  
WDW EM  
SSB 0  
LB 1.00 Hz  
GB 0  
PC 1.40

166.81  
159.68

133.59  
128.15  
118.76  
116.66  
110.36

77.32  
77.00  
76.68  
68.52  
66.83  
63.88

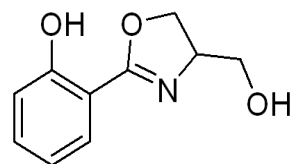

13

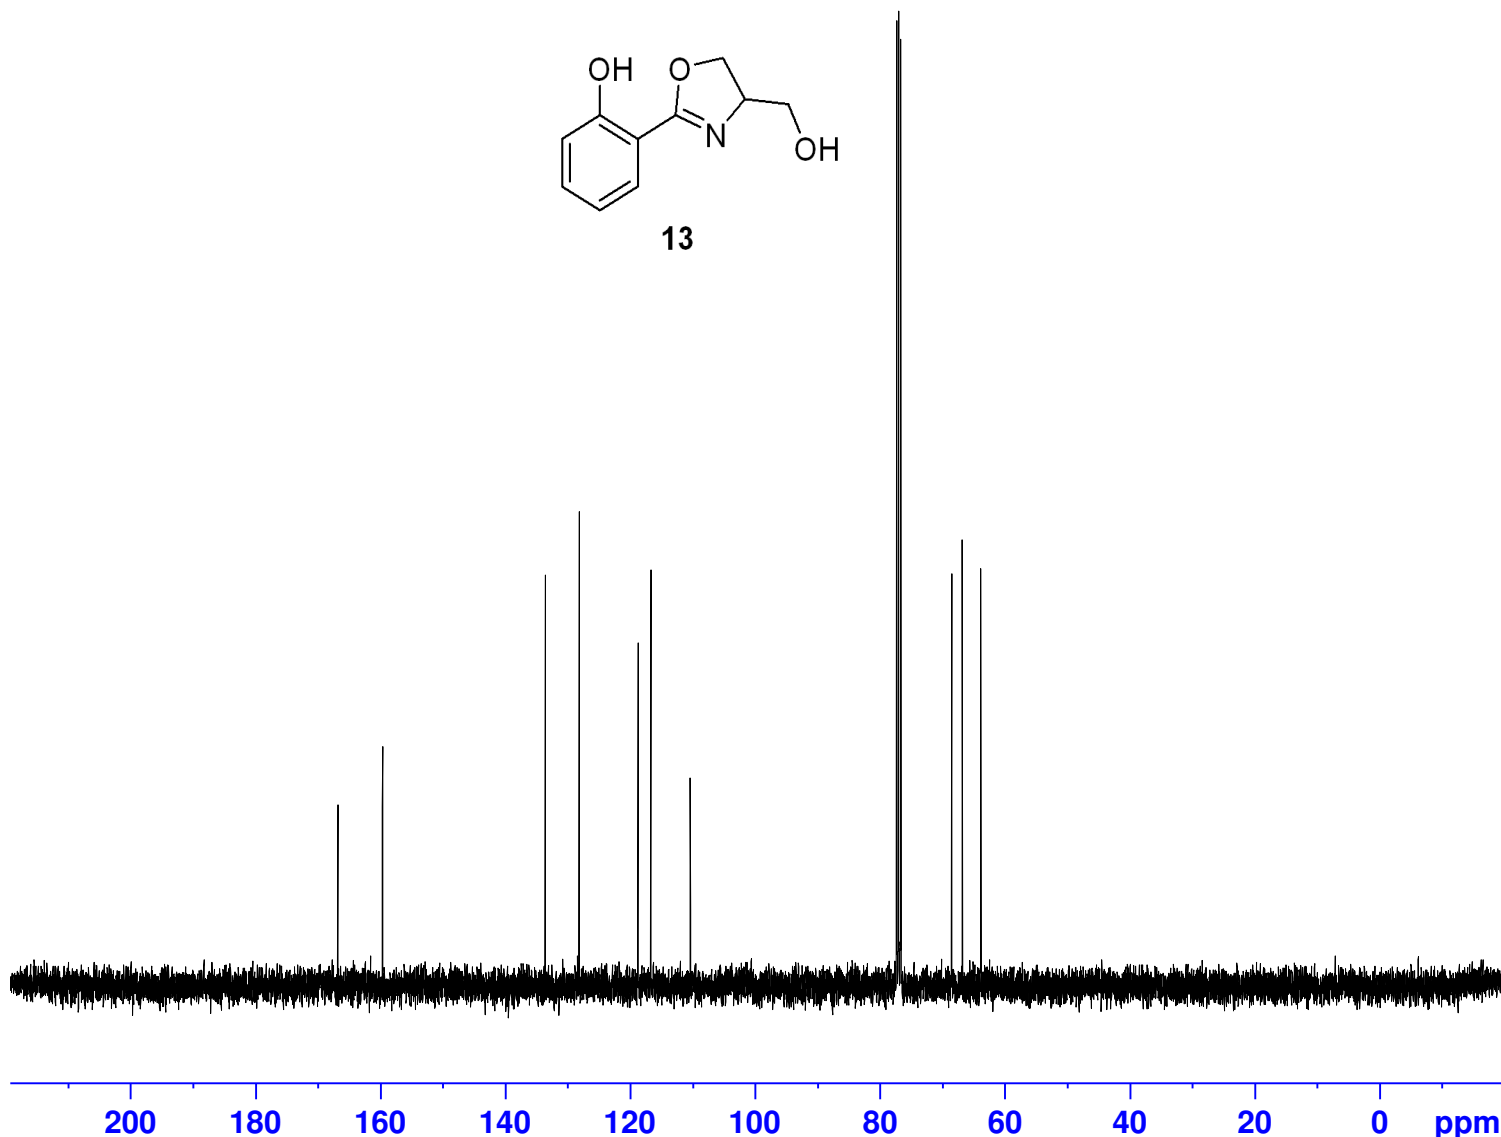

S-202



7.893  
7.682  
7.663  
7.414  
7.395  
7.377  
6.963  
6.943  
6.903  
6.884  
6.866

4.980  
4.650  
4.639

3.310

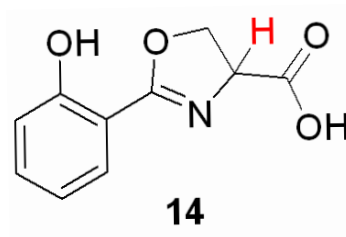

Current Data Parameters  
NAME hh-3-151-h-fr1  
EXPNO 2  
PROCNO 1

F2 - Acquisition Parameters  
Date\_ 20190705  
Time 14.45  
INSTRUM spect  
PROBHD 5 mm PABBO BB/  
PULPROG zg30  
TD 65536  
SOLVENT MeOD  
NS 6  
DS 0  
SWH 8012.820 Hz  
FIDRES 0.122266 Hz  
AQ 4.0894465 sec  
RG 112.31  
DW 62.400 usec  
DE 6.50 usec  
TE 295.0 K  
D1 1.00000000 sec  
TD0 1

==== CHANNEL f1 =====  
SFO1 400.1324710 MHz  
NUC1 1H  
P1 14.50 usec  
PLW1 11.99499989 W

F2 - Processing parameters  
SI 65536  
SF 400.1300082 MHz  
WDW EM  
SSB 0  
LB 0.30 Hz  
GB 0  
PC 1.00

H<sub>2</sub>O & H

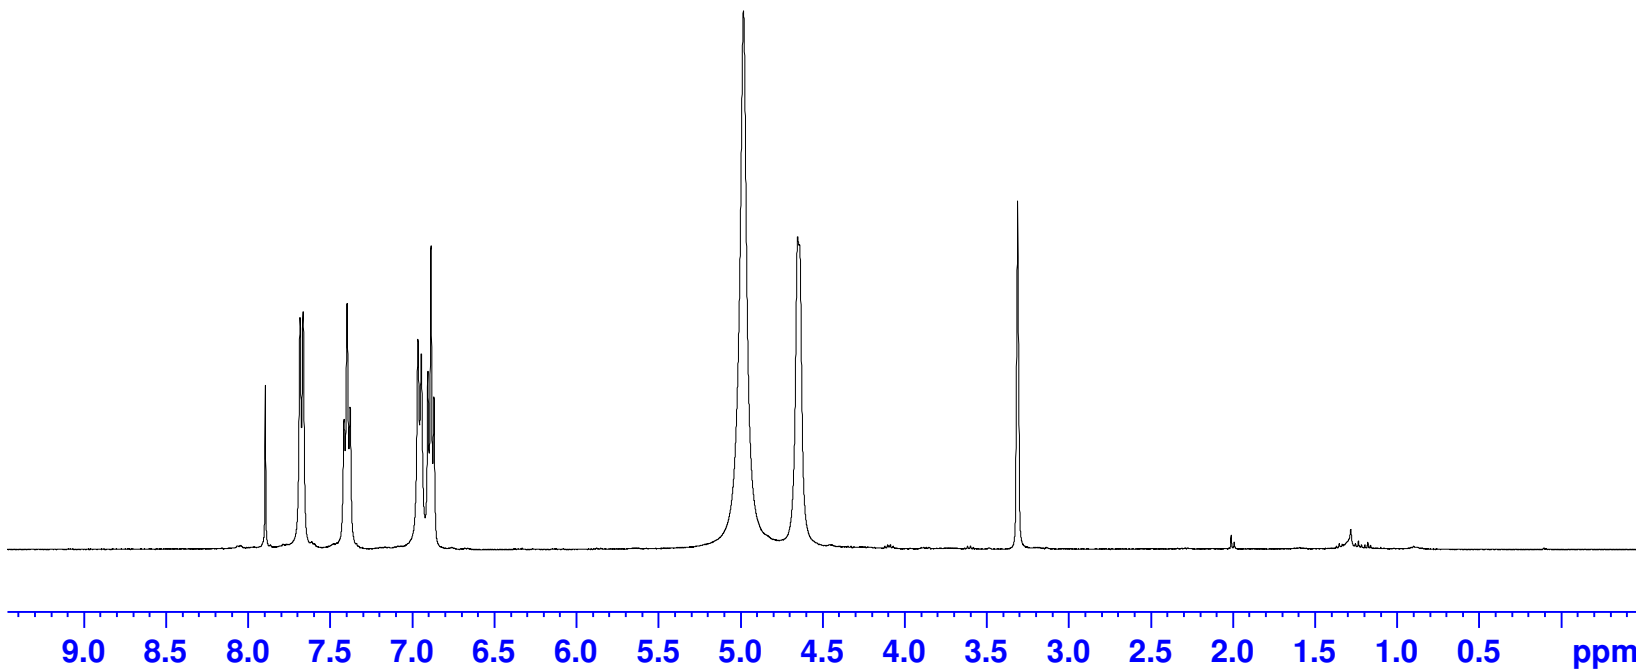



Current Data Parameters  
NAME hh-3-151-c-crude  
EXPNO 2  
PROCNO 1

F2 - Acquisition Parameters  
Date\_ 20190708  
Time 20.29  
INSTRUM spect  
PROBHD 5 mm PABBO BB/  
PULPROG zgpg30  
TD 65536  
SOLVENT MeOD  
NS 231  
DS 0  
SWH 24038.461 Hz  
FIDRES 0.366798 Hz  
AQ 1.3631488 sec  
RG 196.92  
DW 20.800 usec  
DE 6.50 usec  
TE 296.3 K  
D1 2.0000000 sec  
D11 0.03000000 sec  
TD0 1

=====  
CHANNEL f1  
SFO1 100.6228298 MHz  
NUC1 13C  
P1 9.70 usec  
PLW1 46.98899841 W

=====  
CHANNEL f2  
SFO2 400.1316005 MHz  
NUC2 1H  
PCPD2 waltz16  
PLW2 90.00 usec  
PLW12 11.99499989 W  
PLW13 0.34213999 W  
PLW13 0.27713001 W

F2 - Processing parameters  
SI 32768  
SF 100.6126285 MHz  
WDW EM  
SSB 0  
LB 1.00 Hz  
GB 0  
PC 1.40

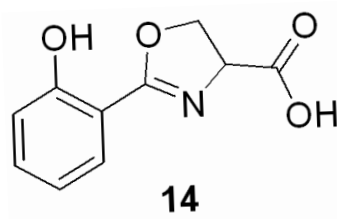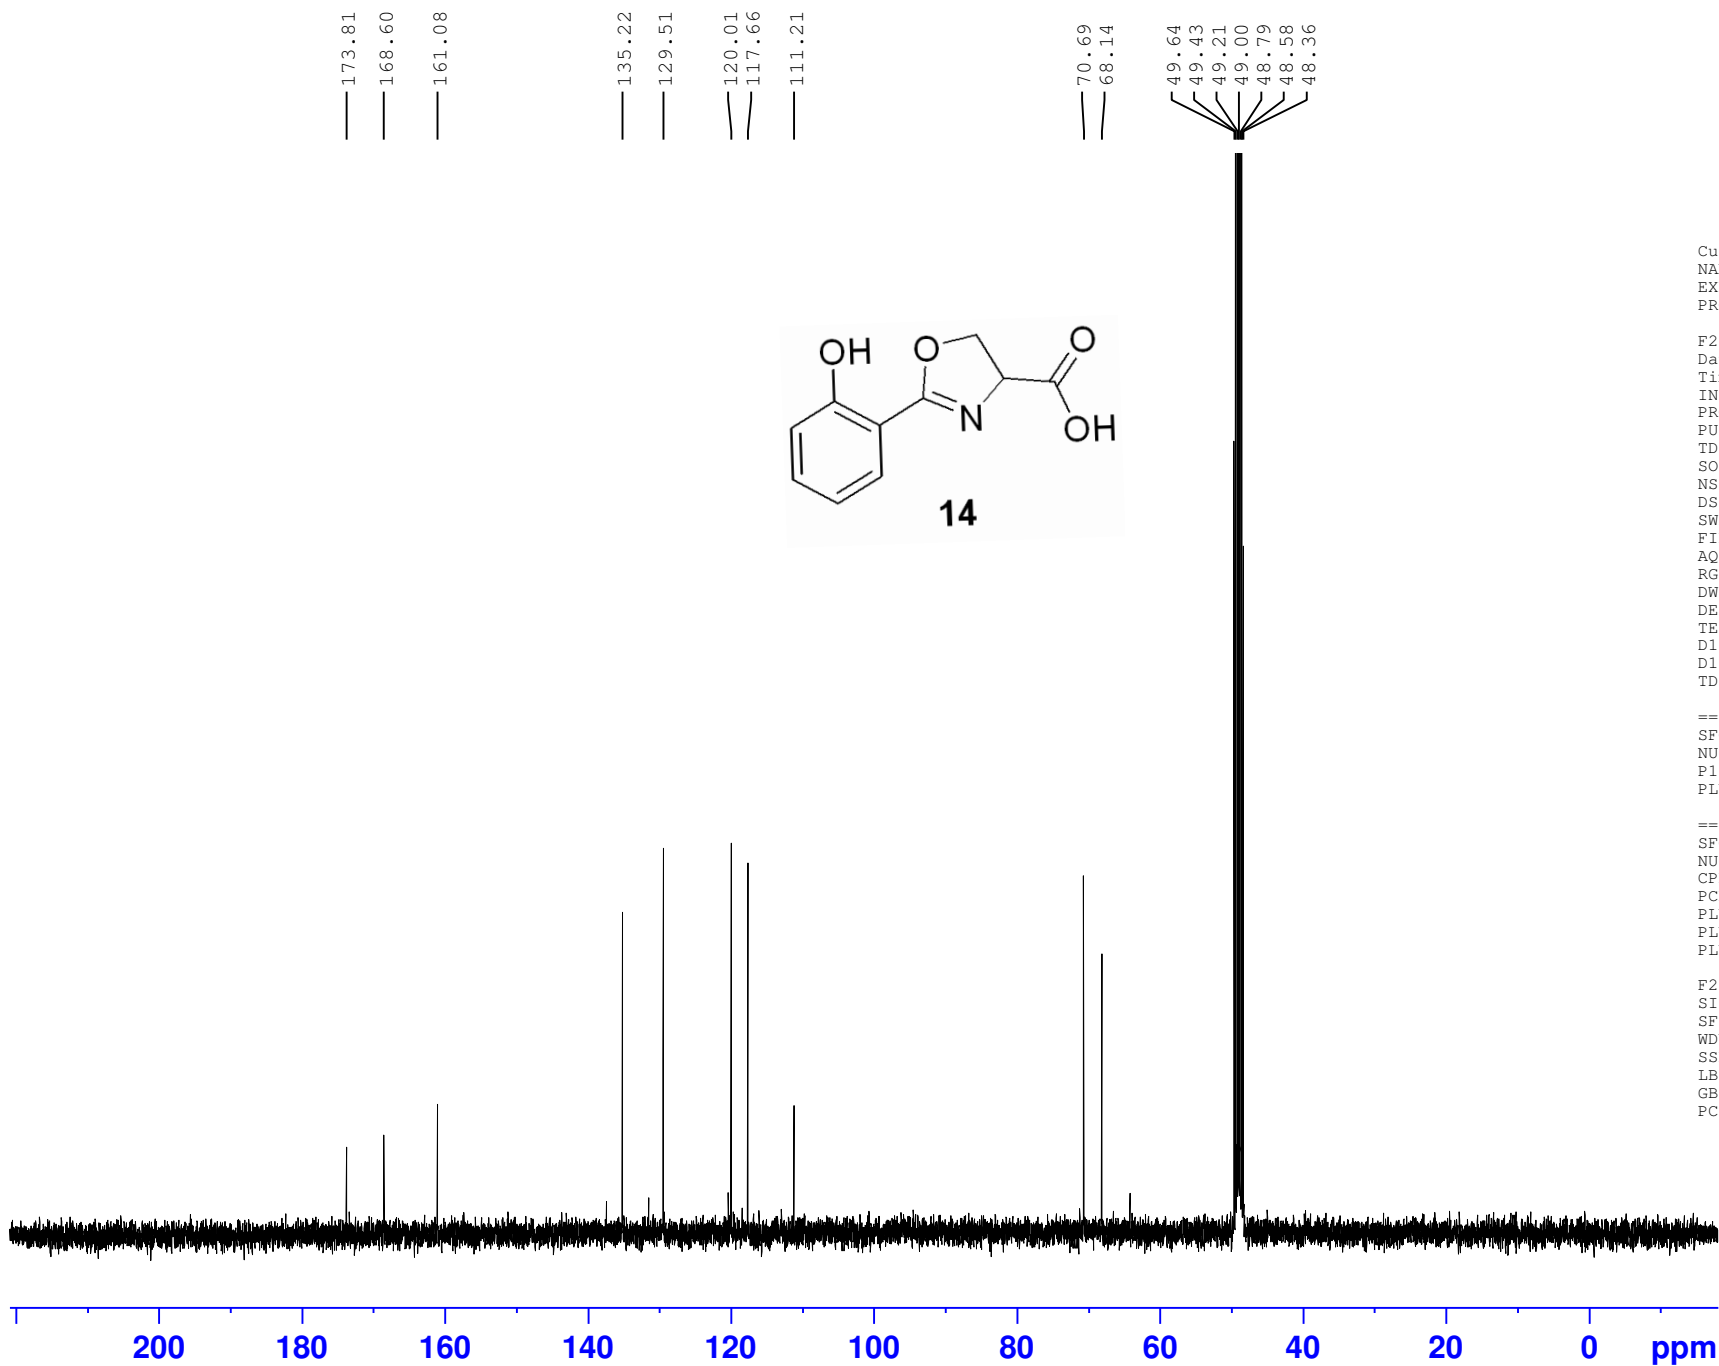

— 11.457

7.696  
7.692  
7.676  
7.672  
7.446  
7.442  
7.425  
7.407  
7.403  
7.260  
7.034  
7.013  
6.928  
6.926  
6.908  
6.890  
6.483  
6.025  
4.966  
4.945  
4.940  
4.919  
4.694  
4.672  
4.669

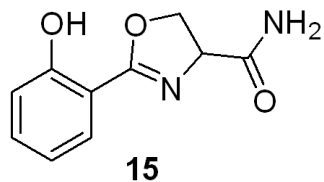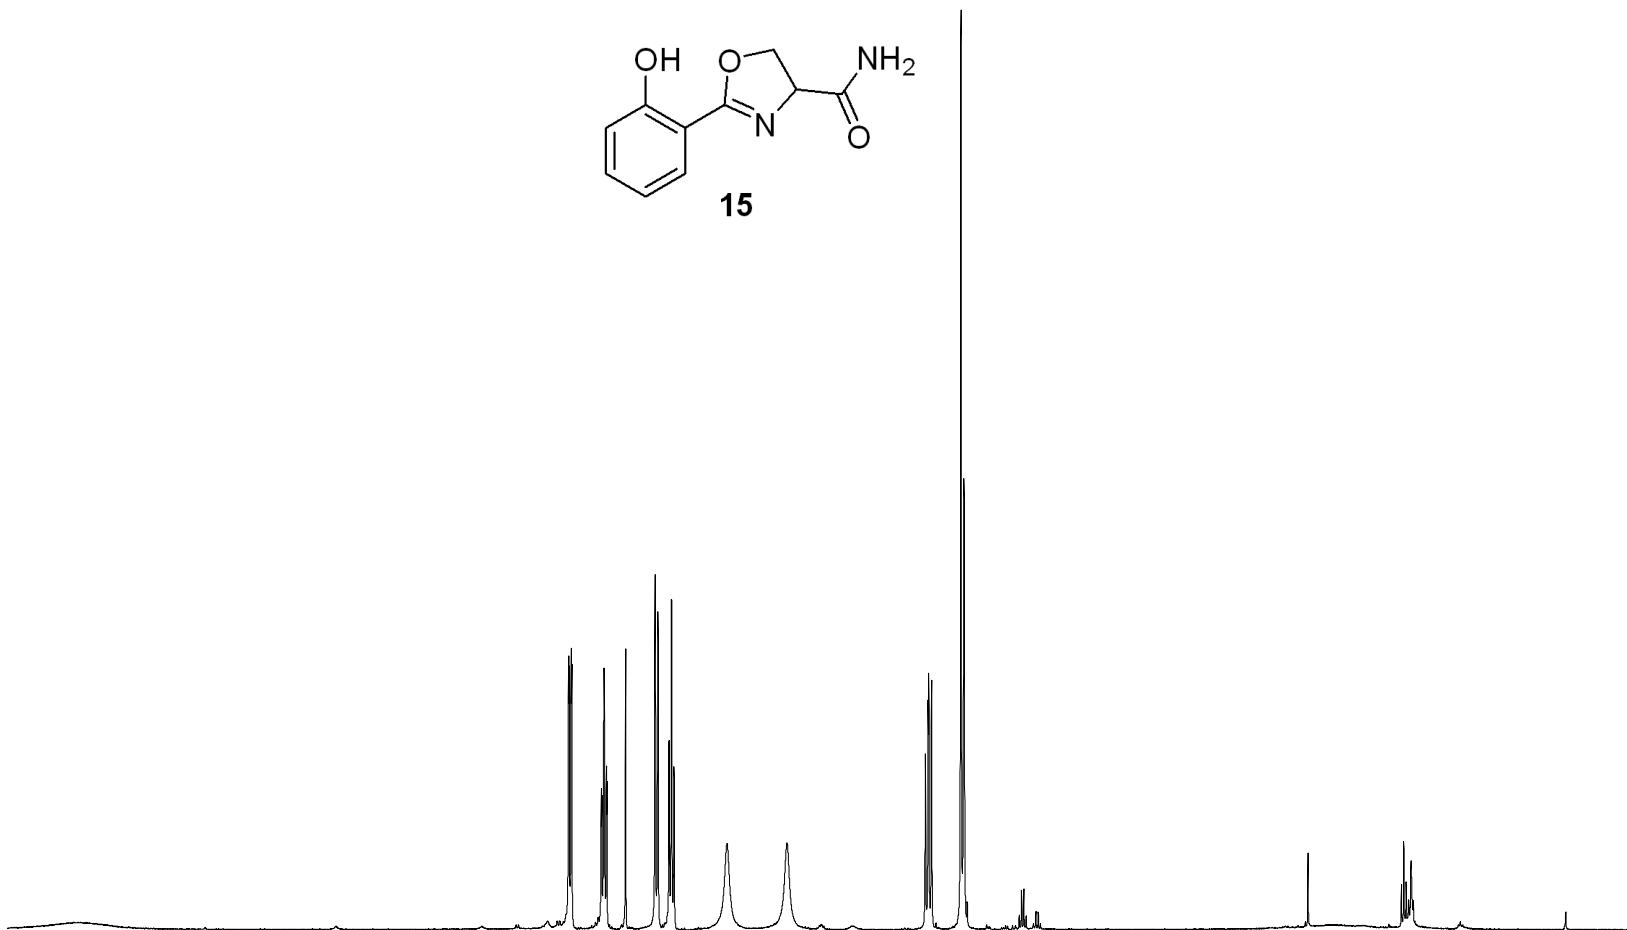

11 10 9 8 7 6 5 4 3 2 1 ppm

0.84  
1.06  
1.04  
1.03  
1.03  
0.91  
0.90  
1.00  
2.00

Current Data Parameters  
NAME hh-3-161-h-fr1  
EXPNO 1  
PROCNO 1

F2 - Acquisition Parameters  
Date\_ 20190711  
Time 19.09  
INSTRUM spect  
PROBHD 5 mm PABBO BB/  
PULPROG zg30  
TD 65536  
SOLVENT CDC13  
NS 4  
DS 0  
SWH 8012.820 Hz  
FIDRES 0.122266 Hz  
AQ 4.0894465 sec  
RG 142.88  
DW 62.400 usec  
DE 6.50 usec  
TE 295.2 K  
D1 1.00000000 sec  
TD0 1

==== CHANNEL f1 =====  
SFO1 400.1324710 MHz  
NUC1 1H  
P1 14.50 usec  
PLW1 11.99499989 W

F2 - Processing parameters  
SI 65536  
SF 400.1300102 MHz  
WDW EM  
SSB 0  
LB 0.30 Hz  
GB 0  
PC 1.00

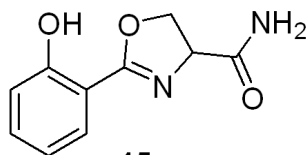

15

173.23  
167.96  
159.68  
134.44  
128.56  
119.22  
116.90  
109.81  
77.32  
77.00  
76.68  
69.58  
67.56

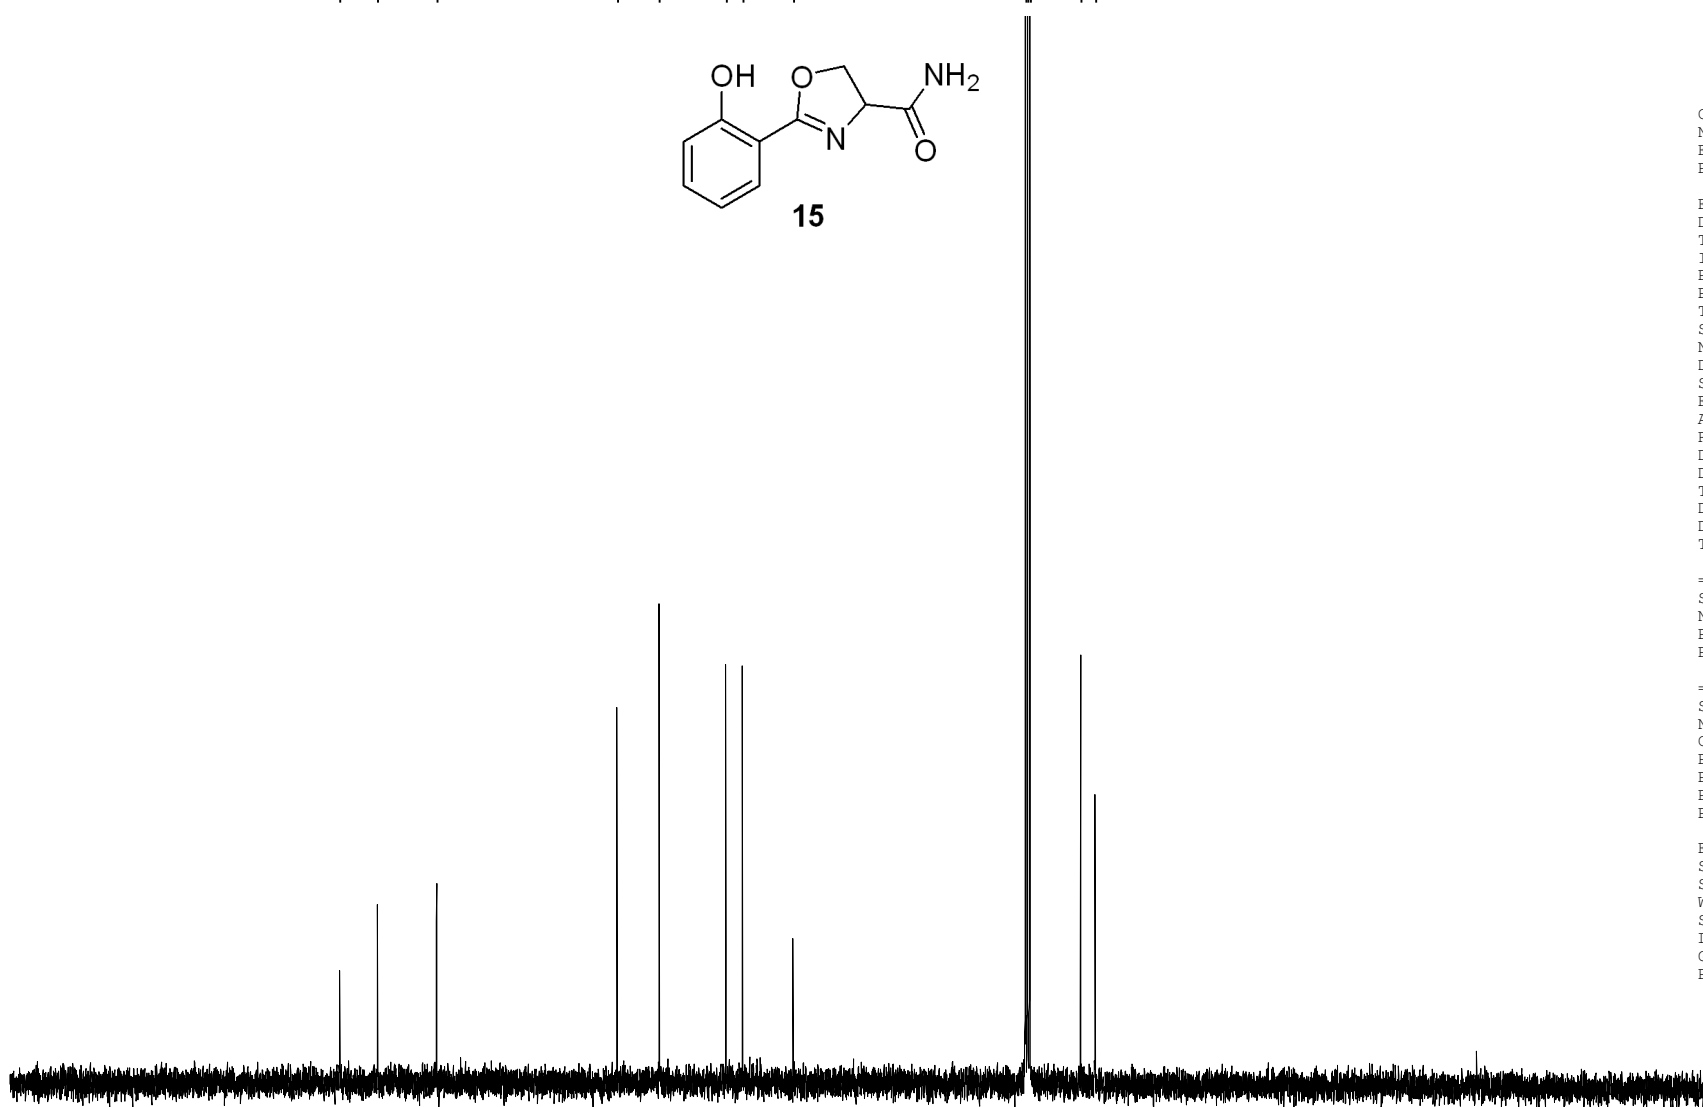

Current Data Parameters  
NAME hh-3-161-c-fr1  
EXPNO 1  
PROCNO 1

F2 - Acquisition Parameters  
Date\_ 20190711  
Time 19.19  
INSTRUM spect  
PROBHD 5 mm PABBO BB/  
PULPROG zgpg30  
TD 65536  
SOLVENT CDCl3  
NS 150  
DS 0  
SWH 24038.461 Hz  
FIDRES 0.366798 Hz  
AQ 1.3631488 sec  
RG 196.92  
DW 20.800 usec  
DE 6.50 usec  
TE 296.3 K  
D1 2.0000000 sec  
D11 0.0300000 sec  
TD0 1

==== CHANNEL f1 =====  
SFO1 100.6228298 MHz  
NUC1 13C  
P1 9.70 usec  
PLW1 46.98899841 W

==== CHANNEL f2 =====  
SFO2 400.1316005 MHz  
NUC2 1H  
PCPDG[2] waltz16  
PCPD2 90.00 usec  
PLW2 11.99499989 W  
PLW12 0.34213999 W  
PLW13 0.27713001 W

F2 - Processing parameters  
SI 32768  
SF 100.6127736 MHz  
WDW EM  
SSB 0  
LB 1.00 Hz  
GB 0  
PC 1.40

200 180 160 140 120 100 80 60 40 20 0 ppm

S-206
